# Supplementary material for: Nanoscale Two-Dimensional FeII- and CoII-Based Metal–Organic Frameworks of Porphyrin Ligand for the Photodynamic Therapy of Breast Cancer
Source: MDPI journal article supplement (doi:10.3390/molecules28052125), 2023-02-24
Supplement: s1 [file s1]

*Supplementary Material for*

# **Nanoscale Two-dimensional Fe<sup>II</sup>- and Co<sup>II</sup>-Based Metal–Organic Frameworks of Porphyrin Ligand for the Photodynamic Therapy of Breast Cancer**

**Qing Li <sup>1,‡</sup>, Bo-Wei Xu <sup>1,‡</sup>, Yi-Min Zou <sup>2</sup>, Ru-Jie Niu <sup>1</sup>, Jin-Xiang Chen <sup>2,\*</sup>, Wen-Hua Zhang <sup>1,\*</sup> and David J. Young <sup>3</sup>**

<sup>1</sup> College of Chemistry, Chemical Engineering, and Materials Science, Soochow University, Suzhou 215123, China

<sup>2</sup> NMPA Key Laboratory for Research and Evaluation of Drug Metabolism, Guangdong Provincial Key Laboratory of New Drug Screening, School of Pharmaceutical Sciences, Southern Medical University, Guangzhou 510515, China

<sup>3</sup> College of Engineering, Information Technology & Environment, Charles Darwin University, Darwin, Northern Territory 0810, Australia

<sup>‡</sup> These authors contributed equally to this work

<sup>\*</sup> Correspondence: whzhang@suda.edu.cn (W.-H.Z.); jxchen@smu.edu.cn (J.-X.C.)

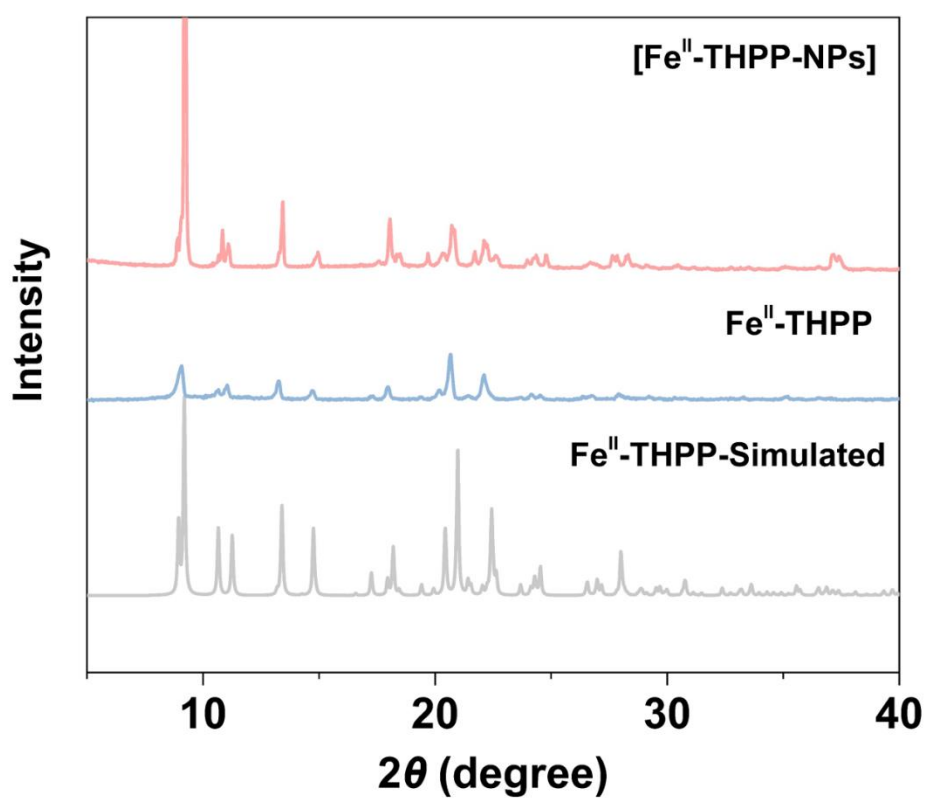

**Figure S1.** The PXRD patterns of the  $[\text{Fe}^{\text{II}}\text{-THPP-NPs}]$  (light-red),  $\text{Fe}^{\text{II}}\text{-THPP}$  (experimental, light-blue), and  $\text{Fe}^{\text{II}}\text{-THPP}$  (simulated, gray), showing the good consistency of these diffraction patterns and thus the shared structure connectivity of these materials.

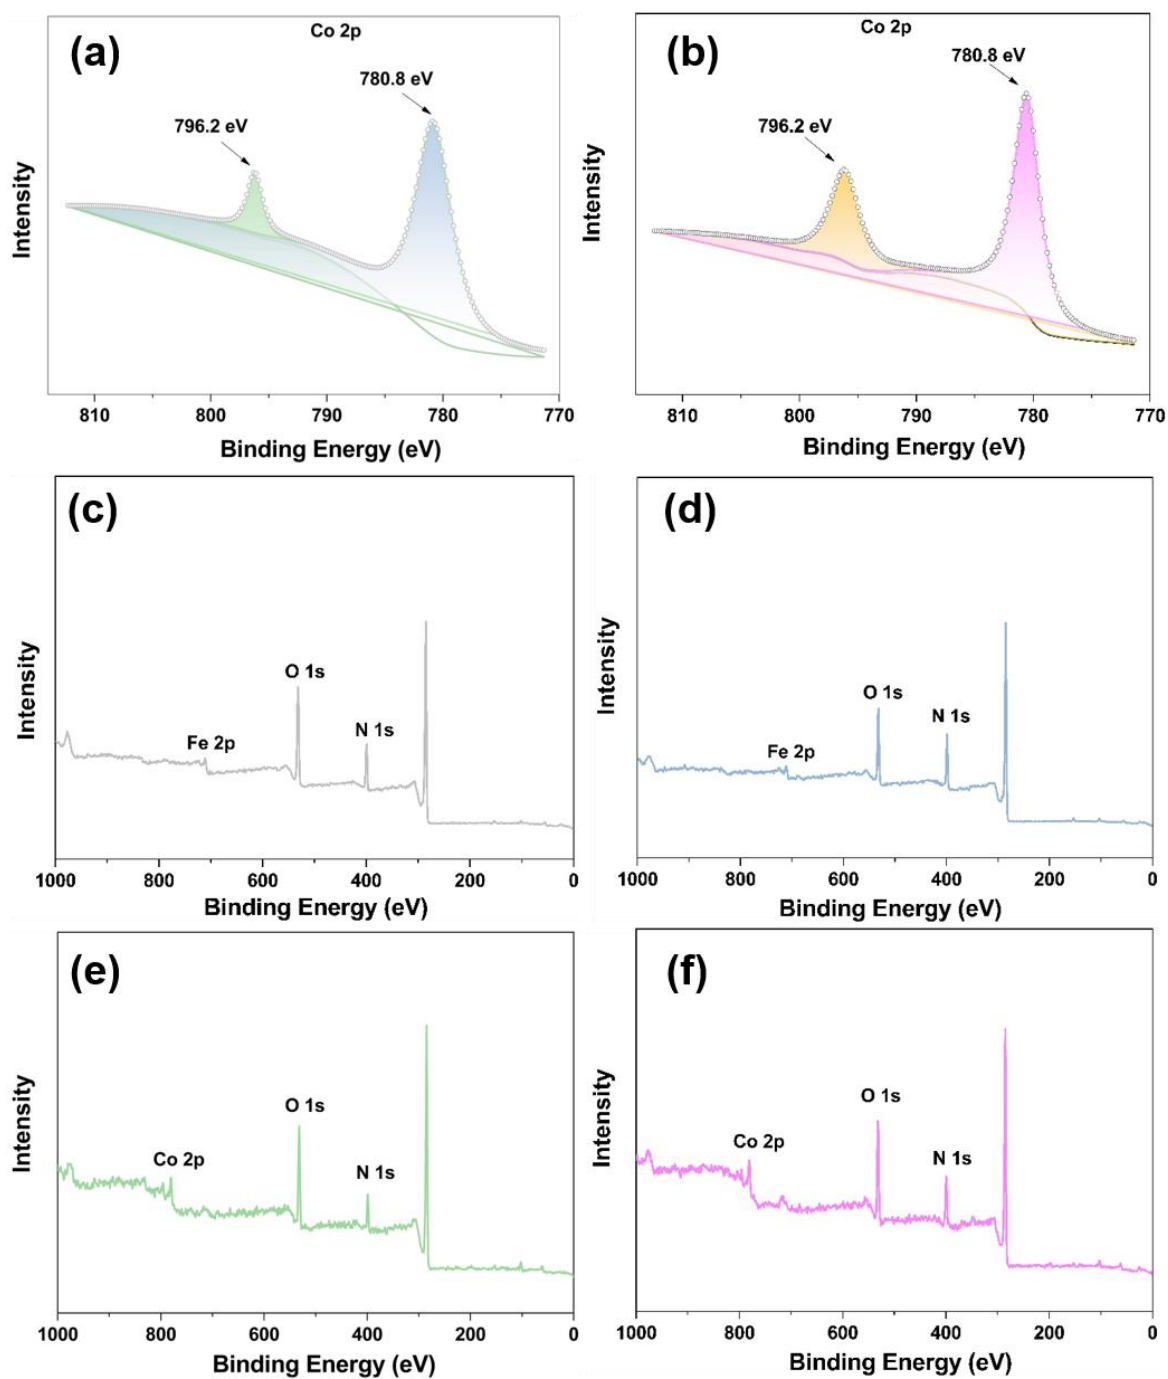

**Figure S2.** The Co 2p XPS spectra of [Co<sup>II</sup>-THPP-flower] (a) and [Co<sup>II</sup>-THPP-film] (b), showing binding energies at 780.8 eV (Co 2p<sub>3/2</sub>) and 796.2 eV (Co 2p<sub>1/2</sub>) (a, b). The full XPS spectra of Fe<sup>II</sup>-THPP (c), [Fe<sup>II</sup>-THPP-NPs] (d), [Co<sup>II</sup>-THPP-flower] (e) and [Co<sup>II</sup>-THPP-film] (f).

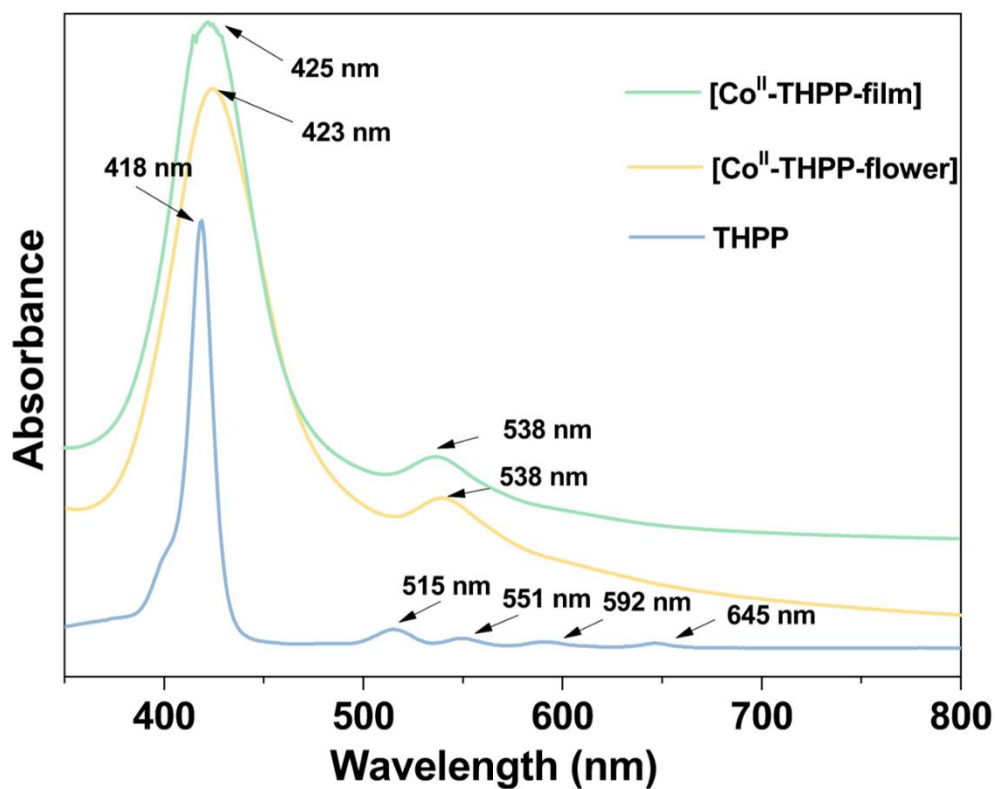

**Figure S3.** UV-Vis absorption spectra of the free-based ligand THPP (light-blue), [Co<sup>II</sup>-THPP-flower] (light orange) and [Co<sup>II</sup>-THPP-film] (light green) in MeOH solution.

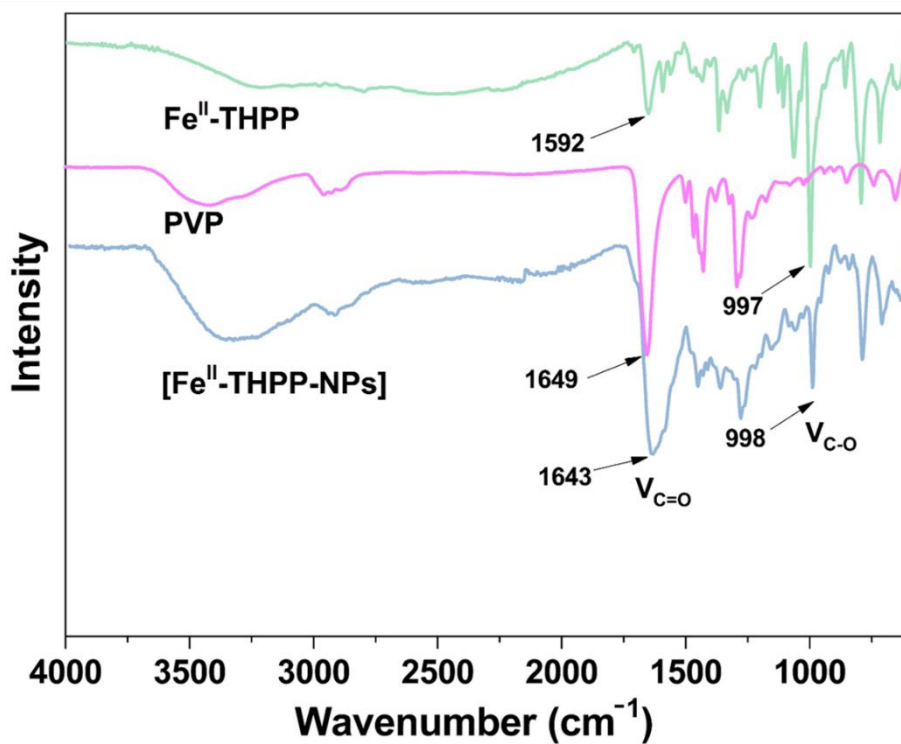

**Figure S4.** FT-IR spectra of PVP, Fe<sup>II</sup>-THPP, and [Fe<sup>II</sup>-THPP-NPs], showing the successful coating of PVP onto the surface of Fe<sup>II</sup>-THPP.

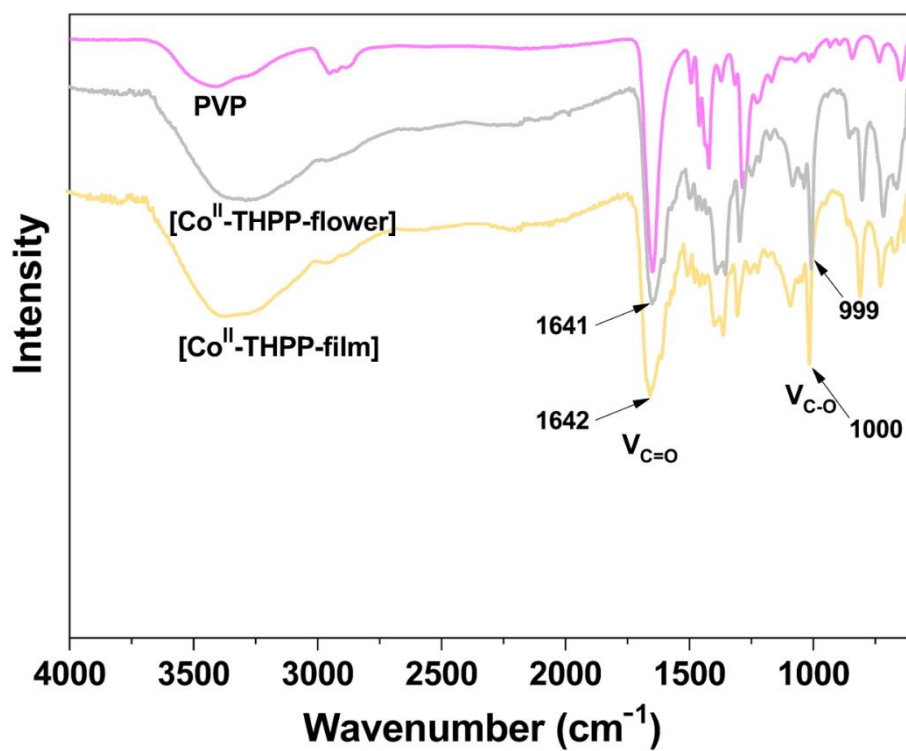

**Figure S5.** A comparison of the FT-IR spectra of PVP, [Co<sup>II</sup>-THPP-flower] and [Co<sup>II</sup>-THPP-film], showing the successful coating of PVP on the surface of [Co<sup>II</sup>-THPP-flower] and [Co<sup>II</sup>-THPP-film].

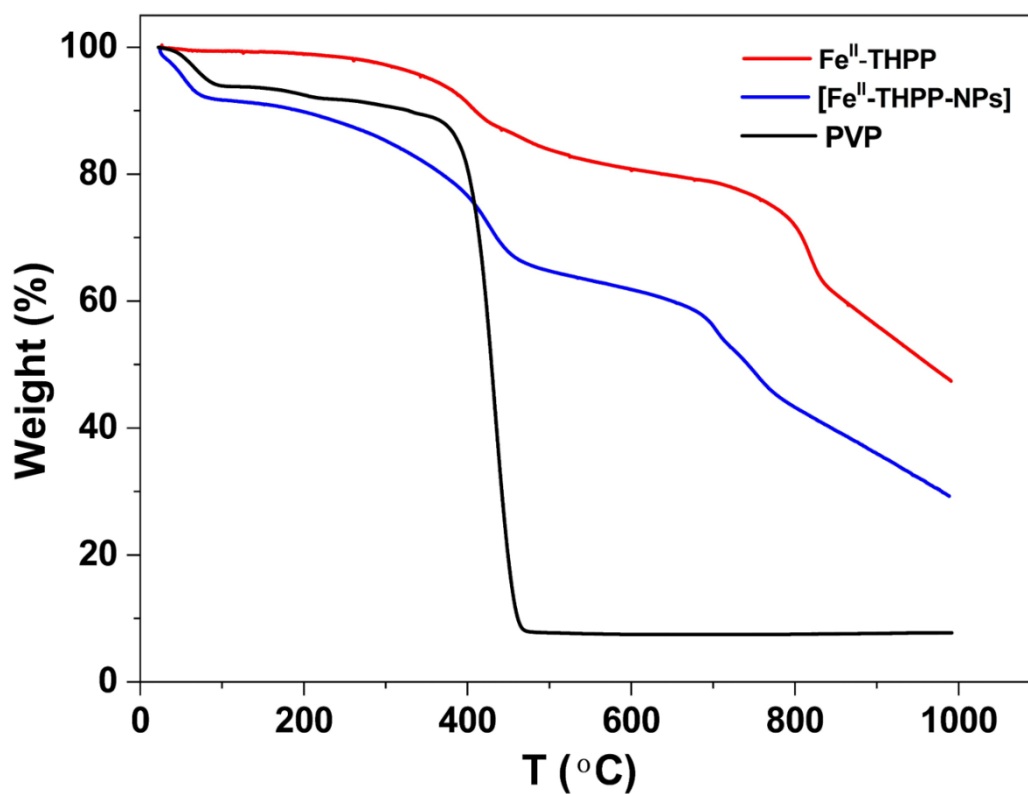

**Figure S6.** TGA curves of PVP (black), Fe<sup>II</sup>-THPP (red), and [Fe<sup>II</sup>-THPP-NPs] (blue) heated up to 1000°C.

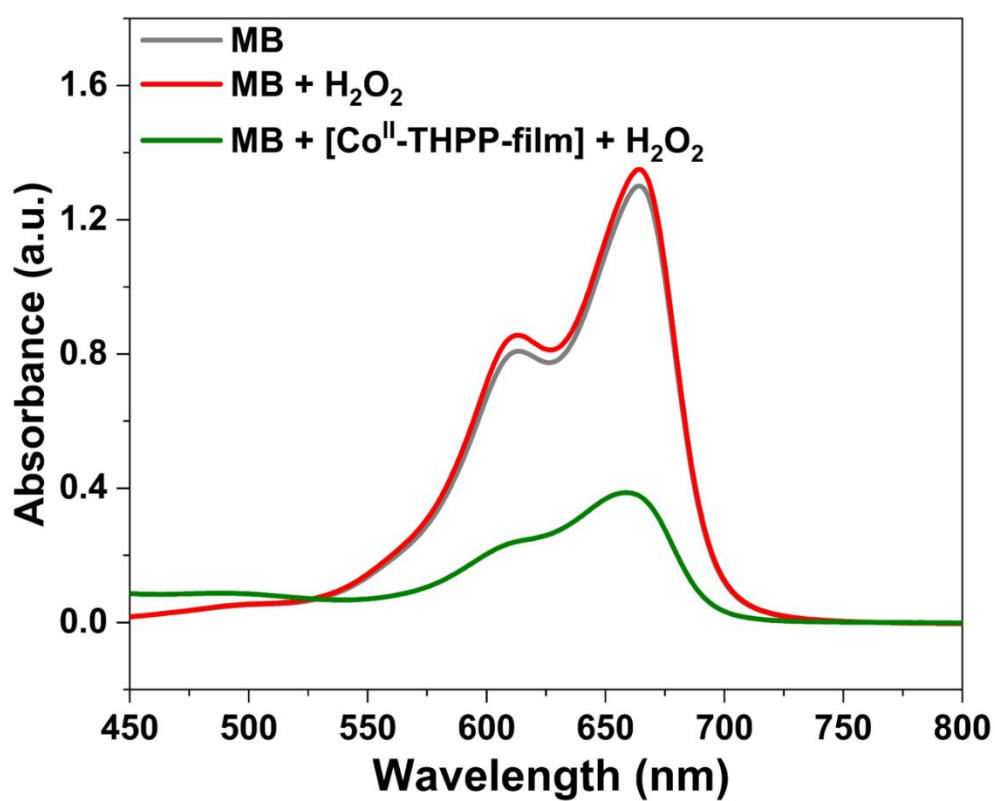

**Figure S7.** UV-Vis absorption spectra of MB, MB with H<sub>2</sub>O<sub>2</sub>, and MB with H<sub>2</sub>O<sub>2</sub> in the presence of [Co<sup>II</sup>-THPP-film] after incubation in PBS buffer for 30 min.

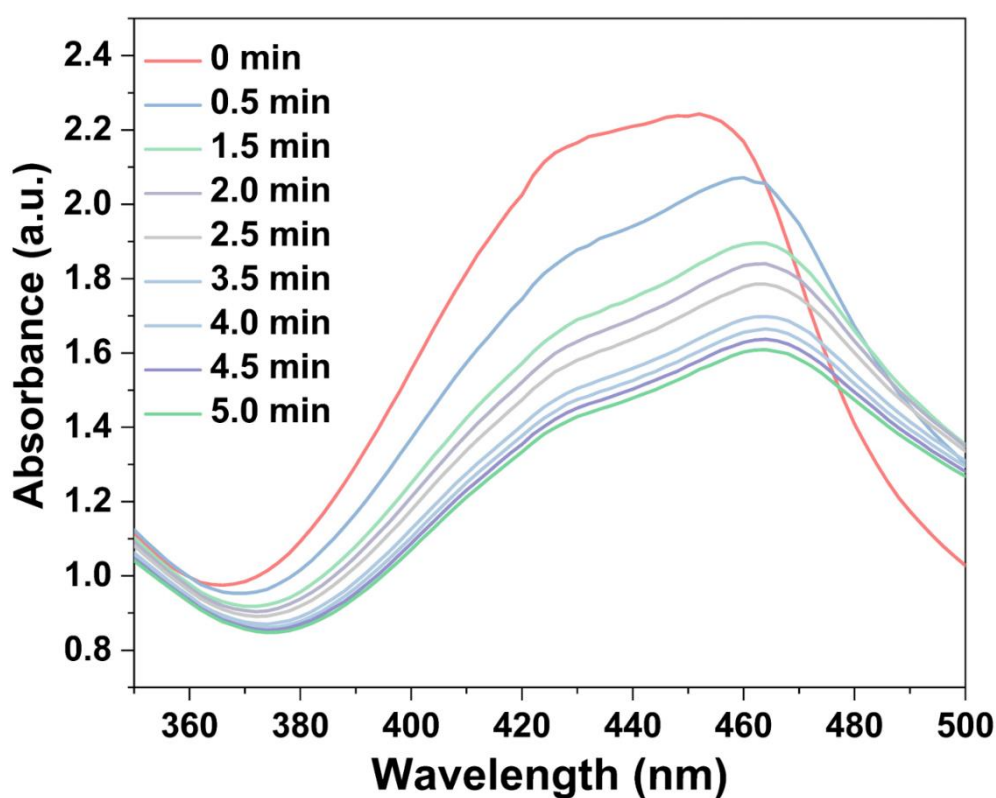

**Figure S8.** DPBF absorption changes in the presence of [Co<sup>II</sup>-THPP-film].

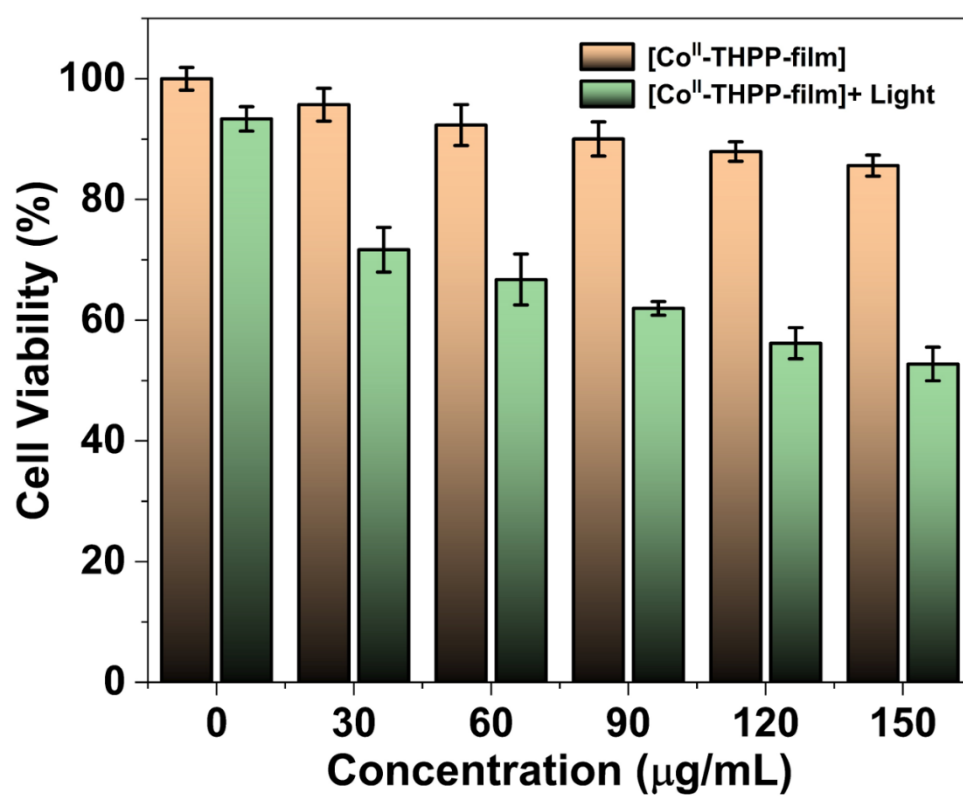

**Figure S9.** The cell viability of 4T1 cells treated with different concentrations of [Co<sup>II</sup>-THPP-film] in the absence/presence of 660 nm laser (220 mW cm<sup>-2</sup>) irradiation. Data are represented as means  $\pm$  SD; n = 5.
