# Supplementary material for: Nanoscale Two-Dimensional FeII- and CoII-Based Metal–Organic Frameworks of Porphyrin Ligand for the Photodynamic Therapy of Breast Cancer
Source: Molecules. 2023 Feb 24;28(5):2125. doi: 10.3390/molecules28052125 (PMC10003974; doi:10.3390/molecules28052125)
Supplement: Supplementary file 1 [file molecules-28-02125-s001.zip › FE-THPP.cif]

 
data_FE-THPP

_audit_update_record
;
2023-01-16 # Formatted by publCIF
;
 
_audit_creation_method            'SHELXL-2016/6'
_shelx_SHELXL_version_number      '2016/6'
_chemical_name_systematic         ?
_chemical_name_common             ?
_chemical_melting_point           ?
_chemical_formula_moiety         
 'C44 H32 Fe N8 O4' 
_chemical_formula_sum
 'C44 H32 Fe N8 O4' 
_chemical_formula_weight          792.62

loop_
 _atom_type_symbol
 _atom_type_description
 _atom_type_scat_dispersion_real
 _atom_type_scat_dispersion_imag
 _atom_type_scat_source
 'C'  'C'   0.0137   0.0067
 'International Tables Vol C Tables 4.2.6.8 and 6.1.1.4'
 'H'  'H'   0.0000   0.0000
 'International Tables Vol C Tables 4.2.6.8 and 6.1.1.4'
 'Fe'  'Fe'  -0.2673   2.5550
 'International Tables Vol C Tables 4.2.6.8 and 6.1.1.4'
 'N'  'N'   0.0241   0.0134
 'International Tables Vol C Tables 4.2.6.8 and 6.1.1.4'
 'O'  'O'   0.0389   0.0241
 'International Tables Vol C Tables 4.2.6.8 and 6.1.1.4'
 
_space_group_crystal_system       monoclinic
_space_group_IT_number            14
_space_group_name_H-M_alt         'P 21/c'
_space_group_name_Hall            '-P 2ybc'
 
_shelx_space_group_comment
;
The symmetry employed for this shelxl refinement is uniquely defined
by the following loop, which should always be used as a source of
symmetry information in preference to the above space-group names.
They are only intended as comments.
;
 
loop_
 _space_group_symop_operation_xyz
 'x, y, z'
 '-x, y+1/2, -z+1/2'
 '-x, -y, -z'
 'x, -y-1/2, z-1/2'
 
_cell_length_a                    9.8772(4)
_cell_length_b                    9.1364(3)
_cell_length_c                    20.2948(7)
_cell_angle_alpha                 90
_cell_angle_beta                  103.3415(17)
_cell_angle_gamma                 90
_cell_volume                      1782.02(11)
_cell_formula_units_Z             2
_cell_measurement_temperature     153(2)
_cell_measurement_reflns_used      7753
_cell_measurement_theta_min        4.64
_cell_measurement_theta_max       60.59
 
_exptl_crystal_description        block
_exptl_crystal_colour             purple
_exptl_crystal_density_meas       ?
_exptl_crystal_density_method     ?
_exptl_crystal_density_diffrn     1.477          
_exptl_crystal_F_000              820
_exptl_transmission_factor_min    ?
_exptl_transmission_factor_max    ?
_exptl_crystal_size_max           0.150
_exptl_crystal_size_mid           0.100
_exptl_crystal_size_min           0.080
_exptl_absorpt_coefficient_mu     2.653
_shelx_estimated_absorpt_T_min    0.692
_shelx_estimated_absorpt_T_max    0.816
_exptl_absorpt_correction_type   multi-scan
_exptl_absorpt_correction_T_min  0.0664
_exptl_absorpt_correction_T_max  0.1550
_exptl_absorpt_process_details
;
 SADABS 2016/2: Krause, L., Herbst-Irmer, R., Sheldrick G.M. & Stalke D.,
 J. Appl. Cryst. 48 (2015) 3-10
;
_exptl_absorpt_special_details    ?
_diffrn_ambient_temperature       153(2)
_diffrn_radiation_wavelength      1.34138
_diffrn_radiation_type            GaK\a
_diffrn_source                    ?
_diffrn_measurement_device_type  'Bruker APEX-II CCD'
_diffrn_measurement_method       '\f and \w scans'
_diffrn_detector_area_resol_mean  ?
_diffrn_standards_number          0
_diffrn_standards_interval_count  0
_diffrn_standards_interval_time   0
_diffrn_standards_decay_%         0
_diffrn_reflns_number             14711
_diffrn_reflns_av_unetI/netI      0.0409
_diffrn_reflns_av_R_equivalents   0.0436
_diffrn_reflns_limit_h_min        -12
_diffrn_reflns_limit_h_max        12
_diffrn_reflns_limit_k_min        -11
_diffrn_reflns_limit_k_max        10
_diffrn_reflns_limit_l_min        -26
_diffrn_reflns_limit_l_max        26
_diffrn_reflns_theta_min          3.895
_diffrn_reflns_theta_max          60.651
_diffrn_reflns_theta_full         53.594
_diffrn_measured_fraction_theta_max   0.998
_diffrn_measured_fraction_theta_full  0.998
_diffrn_reflns_Laue_measured_fraction_max    0.998
_diffrn_reflns_Laue_measured_fraction_full   0.998
_diffrn_reflns_point_group_measured_fraction_max   0.998
_diffrn_reflns_point_group_measured_fraction_full  0.998
_reflns_number_total              4087
_reflns_number_gt                 3254
_reflns_threshold_expression      'I > 2\s(I)'
_reflns_Friedel_coverage          0.000
_reflns_Friedel_fraction_max      .
_reflns_Friedel_fraction_full     .
 
_reflns_special_details
;
 Reflections were merged by SHELXL according to the crystal
 class for the calculation of statistics and refinement.
 
 _reflns_Friedel_fraction is defined as the number of unique
 Friedel pairs measured divided by the number that would be
 possible theoretically, ignoring centric projections and
 systematic absences.
;
 
_computing_data_collection        'Bruker Apex II'
_computing_cell_refinement        'Bruker Apex II'
_computing_data_reduction         'Bruker Apex II'
_computing_structure_solution     'SHELXL-2016/6 (Sheldrick, 2016)'
_computing_structure_refinement   'SHELXL-2016/6 (Sheldrick, 2016)'
_computing_molecular_graphics     'SHELXL-2016/6 (Sheldrick, 2016)'
_computing_publication_material   'publCIF (Westrip, 2010)'
_refine_special_details           ?
_refine_ls_structure_factor_coef  Fsqd
_refine_ls_matrix_type            full
_refine_ls_weighting_scheme       calc
_refine_ls_weighting_details
'w=1/[\s^2^(Fo^2^)+(0.1218P)^2^+0.3618P] where P=(Fo^2^+2Fc^2^)/3'
_atom_sites_solution_primary      ?
_atom_sites_solution_secondary    ?
_atom_sites_solution_hydrogens    mixed
_refine_ls_hydrogen_treatment     mixed
_refine_ls_extinction_method      none
_refine_ls_extinction_coef        .
_refine_ls_number_reflns          4087
_refine_ls_number_parameters      263
_refine_ls_number_restraints      1
_refine_ls_R_factor_all           0.0716
_refine_ls_R_factor_gt            0.0533
_refine_ls_wR_factor_ref          0.1834
_refine_ls_wR_factor_gt           0.1627
_refine_ls_goodness_of_fit_ref    1.048
_refine_ls_restrained_S_all       1.048
_refine_ls_shift/su_max           0.000
_refine_ls_shift/su_mean          0.000
 
loop_
 _atom_site_label
 _atom_site_type_symbol
 _atom_site_fract_x
 _atom_site_fract_y
 _atom_site_fract_z
 _atom_site_U_iso_or_equiv
 _atom_site_adp_type
 _atom_site_occupancy
 _atom_site_site_symmetry_order  
 _atom_site_calc_flag
 _atom_site_refinement_flags_posn
 _atom_site_refinement_flags_adp
 _atom_site_refinement_flags_occupancy
 _atom_site_disorder_assembly
 _atom_site_disorder_group
Fe1 Fe 0.500000 0.500000 0.500000 0.0397(2) Uani 1 2 d S . P . .
O1 O 0.6651(2) 0.1317(2) 0.97046(10) 0.0484(5) Uani 1 1 d . . . . .
H1 H 0.721(4) 0.170(4) 1.004(2) 0.073 Uiso 1 1 d . U . . .
O2 O 1.1056(4) 1.3450(3) 0.67202(16) 0.0980(11) Uani 1 1 d . . . . .
H2 H 1.148543 1.424874 0.674301 0.147 Uiso 1 1 calc R U . . .
N1 N 0.4446(2) 0.3163(2) 0.54566(10) 0.0395(5) Uani 1 1 d . . . . .
N2 N 0.6366(2) 0.5601(2) 0.58958(10) 0.0392(5) Uani 1 1 d . . . . .
N3 N 0.7713(3) 0.1337(3) 0.81129(13) 0.0591(7) Uani 1 1 d . . . . .
N4 N 0.8030(3) 1.1922(3) 0.57110(14) 0.0554(6) Uani 1 1 d . U . . .
C1 C 0.3497(3) 0.2127(3) 0.51646(13) 0.0405(5) Uani 1 1 d . . . . .
C2 C 0.3295(3) 0.1106(3) 0.56802(14) 0.0505(7) Uani 1 1 d . . . . .
H2A H 0.268086 0.029103 0.561573 0.061 Uiso 1 1 calc R U . . .
C3 C 0.4151(3) 0.1534(3) 0.62733(14) 0.0494(7) Uani 1 1 d . . . . .
H3 H 0.425286 0.107153 0.670126 0.059 Uiso 1 1 calc R U . . .
C4 C 0.4877(3) 0.2822(3) 0.61303(12) 0.0406(5) Uani 1 1 d . . . . .
C5 C 0.5866(3) 0.3582(3) 0.66121(12) 0.0408(5) Uani 1 1 d . . . . .
C6 C 0.6527(3) 0.4885(3) 0.65032(13) 0.0416(6) Uani 1 1 d . . . . .
C7 C 0.7441(3) 0.5732(3) 0.70221(13) 0.0508(7) Uani 1 1 d . . . . .
H7 H 0.774269 0.547348 0.748633 0.061 Uiso 1 1 calc R U . . .
C8 C 0.7789(3) 0.6956(3) 0.67282(14) 0.0503(7) Uani 1 1 d . . . . .
H8 H 0.836078 0.773105 0.694759 0.060 Uiso 1 1 calc R U . . .
C9 C 0.7127(3) 0.6865(3) 0.60190(13) 0.0423(6) Uani 1 1 d . . . . .
C10 C 0.7199(3) 0.7935(3) 0.55223(13) 0.0413(6) Uani 1 1 d . . . . .
C11 C 0.6241(3) 0.2939(3) 0.73125(13) 0.0416(6) Uani 1 1 d . . . . .
C12 C 0.5492(3) 0.3245(3) 0.77891(13) 0.0470(6) Uani 1 1 d . . . . .
H12 H 0.470351 0.387033 0.767849 0.056 Uiso 1 1 calc R U . . .
C13 C 0.5889(3) 0.2638(3) 0.84318(14) 0.0471(6) Uani 1 1 d . . . . .
H13 H 0.539650 0.286923 0.876877 0.056 Uiso 1 1 calc R U . . .
C14 C 0.6998(3) 0.1705(3) 0.85728(12) 0.0417(6) Uani 1 1 d . . . . .
C15 C 0.7339(4) 0.1978(4) 0.74985(15) 0.0596(8) Uani 1 1 d . . . . .
H15 H 0.786441 0.175363 0.717425 0.072 Uiso 1 1 calc R U . . .
C16 C 0.7497(3) 0.0976(3) 0.92549(13) 0.0475(6) Uani 1 1 d . . . . .
H16A H 0.750566 -0.009822 0.919127 0.057 Uiso 1 1 calc R U . . .
H16B H 0.846312 0.129198 0.945600 0.057 Uiso 1 1 calc R U . . .
C17 C 0.8025(3) 0.9287(3) 0.57411(13) 0.0434(6) Uani 1 1 d . . . . .
C18 C 0.9410(3) 0.9305(3) 0.60738(16) 0.0549(7) Uani 1 1 d . . . . .
H18 H 0.990193 0.841326 0.618917 0.066 Uiso 1 1 calc R U . . .
C19 C 1.0083(4) 1.0645(4) 0.62400(17) 0.0649(9) Uani 1 1 d . . . . .
H19 H 1.102687 1.067924 0.648397 0.078 Uiso 1 1 calc R U . . .
C20 C 0.9347(4) 1.1919(3) 0.60420(16) 0.0576(7) Uani 1 1 d . U . . .
C21 C 0.7385(3) 1.0638(3) 0.55872(15) 0.0478(6) Uani 1 1 d . . . . .
H21 H 0.641873 1.064599 0.537925 0.057 Uiso 1 1 calc R U . . .
C22 C 0.9979(5) 1.3454(4) 0.6167(2) 0.0783(11) Uani 1 1 d . . . . .
H22B H 1.031221 1.377552 0.576630 0.094 Uiso 1 1 calc R U . . .
H22A H 0.925936 1.415306 0.623672 0.094 Uiso 1 1 calc R U . . .
 
loop_
 _atom_site_aniso_label
 _atom_site_aniso_U_11
 _atom_site_aniso_U_22
 _atom_site_aniso_U_33
 _atom_site_aniso_U_23
 _atom_site_aniso_U_13
 _atom_site_aniso_U_12
Fe1 0.0577(4) 0.0311(3) 0.0271(3) 0.00193(18) 0.0037(2) -0.0063(2)
O1 0.0650(12) 0.0459(10) 0.0333(9) 0.0001(8) 0.0094(8) -0.0017(9)
O2 0.119(2) 0.0794(18) 0.0766(18) 0.0113(15) -0.0163(17) -0.0424(18)
N1 0.0531(12) 0.0323(10) 0.0304(10) 0.0016(7) 0.0045(9) -0.0011(8)
N2 0.0544(12) 0.0325(10) 0.0282(10) 0.0012(8) 0.0042(8) -0.0020(9)
N3 0.0677(16) 0.0704(17) 0.0410(13) 0.0164(12) 0.0164(12) 0.0243(13)
N4 0.0703(14) 0.0412(12) 0.0540(15) -0.0014(10) 0.0132(11) -0.0101(11)
C1 0.0539(14) 0.0315(11) 0.0345(12) 0.0012(9) 0.0068(10) -0.0036(10)
C2 0.0681(18) 0.0422(13) 0.0397(14) 0.0041(11) 0.0096(12) -0.0141(13)
C3 0.0715(18) 0.0400(13) 0.0347(13) 0.0059(11) 0.0081(12) -0.0099(13)
C4 0.0574(15) 0.0327(11) 0.0302(12) 0.0033(9) 0.0070(10) -0.0012(10)
C5 0.0555(14) 0.0360(11) 0.0288(11) 0.0037(9) 0.0056(10) 0.0022(10)
C6 0.0564(15) 0.0375(13) 0.0285(12) 0.0011(9) 0.0048(10) -0.0017(10)
C7 0.0720(18) 0.0460(15) 0.0290(12) 0.0028(11) 0.0009(11) -0.0079(13)
C8 0.0661(18) 0.0447(14) 0.0351(13) -0.0016(11) 0.0014(12) -0.0104(12)
C9 0.0563(15) 0.0352(12) 0.0325(12) -0.0001(9) 0.0046(10) -0.0025(10)
C10 0.0529(15) 0.0324(11) 0.0367(13) 0.0000(9) 0.0065(11) -0.0035(10)
C11 0.0562(15) 0.0368(12) 0.0300(12) 0.0016(9) 0.0061(10) -0.0029(11)
C12 0.0619(16) 0.0421(13) 0.0355(13) 0.0041(10) 0.0083(12) 0.0075(12)
C13 0.0669(17) 0.0415(13) 0.0354(13) 0.0050(10) 0.0171(12) 0.0084(12)
C14 0.0554(15) 0.0370(12) 0.0311(12) 0.0027(9) 0.0069(10) -0.0004(11)
C15 0.075(2) 0.070(2) 0.0359(14) 0.0137(13) 0.0191(14) 0.0221(16)
C16 0.0588(16) 0.0476(14) 0.0355(13) 0.0085(11) 0.0094(11) 0.0070(12)
C17 0.0553(15) 0.0371(13) 0.0362(13) -0.0008(10) 0.0075(11) -0.0095(11)
C18 0.0594(17) 0.0491(16) 0.0513(17) 0.0048(13) 0.0030(13) -0.0056(13)
C19 0.0569(18) 0.083(2) 0.0479(17) 0.0066(16) -0.0028(14) -0.0231(17)
C20 0.0750(15) 0.0516(16) 0.0447(16) 0.0004(13) 0.0107(13) -0.0172(15)
C21 0.0565(16) 0.0383(13) 0.0480(15) -0.0006(11) 0.0106(12) -0.0067(12)
C22 0.087(3) 0.068(2) 0.070(2) 0.0035(19) 0.000(2) -0.032(2)
 
_geom_special_details
;
 All esds (except the esd in the dihedral angle between two l.s. planes)
 are estimated using the full covariance matrix.  The cell esds are taken
 into account individually in the estimation of esds in distances, angles
 and torsion angles; correlations between esds in cell parameters are only
 used when they are defined by crystal symmetry.  An approximate (isotropic)
 treatment of cell esds is used for estimating esds involving l.s. planes.
;
 
loop_
 _geom_bond_atom_site_label_1
 _geom_bond_atom_site_label_2
 _geom_bond_distance
 _geom_bond_site_symmetry_2
 _geom_bond_publ_flag
Fe1 N1 2.052(2) . ?
Fe1 N1 2.052(2) 3_666 ?
Fe1 N2 2.073(2) 3_666 ?
Fe1 N2 2.073(2) . ?
Fe1 O1 2.217(2) 2_656 ?
Fe1 O1 2.217(2) 4_565 ?
O1 C16 1.408(3) . ?
O1 H1 0.85(4) . ?
O2 C22 1.356(5) . ?
O2 H2 0.8400 . ?
N1 C1 1.368(3) . ?
N1 C4 1.371(3) . ?
N2 C9 1.369(3) . ?
N2 C6 1.372(3) . ?
N3 C14 1.337(4) . ?
N3 C15 1.350(4) . ?
N4 C20 1.319(4) . ?
N4 C21 1.331(4) . ?
C1 C10 1.406(4) 3_666 ?
C1 C2 1.450(4) . ?
C2 C3 1.359(4) . ?
C2 H2A 0.9500 . ?
C3 C4 1.441(4) . ?
C3 H3 0.9500 . ?
C4 C5 1.398(4) . ?
C5 C6 1.400(4) . ?
C5 C11 1.503(3) . ?
C6 C7 1.443(4) . ?
C7 C8 1.349(4) . ?
C7 H7 0.9500 . ?
C8 C9 1.439(4) . ?
C8 H8 0.9500 . ?
C9 C10 1.417(4) . ?
C10 C17 1.491(3) . ?
C11 C12 1.375(4) . ?
C11 C15 1.378(4) . ?
C12 C13 1.388(4) . ?
C12 H12 0.9500 . ?
C13 C14 1.365(4) . ?
C13 H13 0.9500 . ?
C14 C16 1.513(3) . ?
C15 H15 0.9500 . ?
C16 H16A 0.9900 . ?
C16 H16B 0.9900 . ?
C17 C18 1.378(4) . ?
C17 C21 1.389(4) . ?
C18 C19 1.397(5) . ?
C18 H18 0.9500 . ?
C19 C20 1.382(5) . ?
C19 H19 0.9500 . ?
C20 C22 1.532(5) . ?
C21 H21 0.9500 . ?
C22 H22B 0.9900 . ?
C22 H22A 0.9900 . ?
 
loop_
 _geom_angle_atom_site_label_1
 _geom_angle_atom_site_label_2
 _geom_angle_atom_site_label_3
 _geom_angle
 _geom_angle_site_symmetry_1
 _geom_angle_site_symmetry_3
 _geom_angle_publ_flag
N1 Fe1 N1 180.0 . 3_666 ?
N1 Fe1 N2 89.53(8) . 3_666 ?
N1 Fe1 N2 90.47(8) 3_666 3_666 ?
N1 Fe1 N2 90.47(8) . . ?
N1 Fe1 N2 89.53(8) 3_666 . ?
N2 Fe1 N2 180.00(12) 3_666 . ?
N1 Fe1 O1 91.87(8) . 2_656 ?
N1 Fe1 O1 88.13(8) 3_666 2_656 ?
N2 Fe1 O1 90.60(8) 3_666 2_656 ?
N2 Fe1 O1 89.40(8) . 2_656 ?
N1 Fe1 O1 88.13(8) . 4_565 ?
N1 Fe1 O1 91.87(8) 3_666 4_565 ?
N2 Fe1 O1 89.40(8) 3_666 4_565 ?
N2 Fe1 O1 90.60(8) . 4_565 ?
O1 Fe1 O1 180.00(9) 2_656 4_565 ?
C16 O1 Fe1 129.71(17) . 2_646 ?
C16 O1 H1 104(3) . . ?
Fe1 O1 H1 113(3) 2_646 . ?
C22 O2 H2 109.5 . . ?
C1 N1 C4 107.4(2) . . ?
C1 N1 Fe1 126.74(16) . . ?
C4 N1 Fe1 125.65(17) . . ?
C9 N2 C6 107.1(2) . . ?
C9 N2 Fe1 127.06(16) . . ?
C6 N2 Fe1 125.35(17) . . ?
C14 N3 C15 117.3(3) . . ?
C20 N4 C21 117.9(3) . . ?
N1 C1 C10 125.9(2) . 3_666 ?
N1 C1 C2 109.1(2) . . ?
C10 C1 C2 125.0(2) 3_666 . ?
C3 C2 C1 107.0(2) . . ?
C3 C2 H2A 126.5 . . ?
C1 C2 H2A 126.5 . . ?
C2 C3 C4 107.0(2) . . ?
C2 C3 H3 126.5 . . ?
C4 C3 H3 126.5 . . ?
N1 C4 C5 126.2(2) . . ?
N1 C4 C3 109.4(2) . . ?
C5 C4 C3 124.4(2) . . ?
C4 C5 C6 126.1(2) . . ?
C4 C5 C11 116.6(2) . . ?
C6 C5 C11 117.4(2) . . ?
N2 C6 C5 125.9(2) . . ?
N2 C6 C7 108.9(2) . . ?
C5 C6 C7 125.2(2) . . ?
C8 C7 C6 107.6(2) . . ?
C8 C7 H7 126.2 . . ?
C6 C7 H7 126.2 . . ?
C7 C8 C9 106.9(2) . . ?
C7 C8 H8 126.5 . . ?
C9 C8 H8 126.5 . . ?
N2 C9 C10 124.5(2) . . ?
N2 C9 C8 109.6(2) . . ?
C10 C9 C8 125.9(2) . . ?
C1 C10 C9 125.8(2) 3_666 . ?
C1 C10 C17 115.9(2) 3_666 . ?
C9 C10 C17 118.2(2) . . ?
C12 C11 C15 117.0(2) . . ?
C12 C11 C5 122.1(2) . . ?
C15 C11 C5 120.9(2) . . ?
C11 C12 C13 119.9(3) . . ?
C11 C12 H12 120.0 . . ?
C13 C12 H12 120.0 . . ?
C14 C13 C12 119.0(3) . . ?
C14 C13 H13 120.5 . . ?
C12 C13 H13 120.5 . . ?
N3 C14 C13 122.6(2) . . ?
N3 C14 C16 114.5(2) . . ?
C13 C14 C16 122.9(2) . . ?
N3 C15 C11 124.1(3) . . ?
N3 C15 H15 118.0 . . ?
C11 C15 H15 118.0 . . ?
O1 C16 C14 112.3(2) . . ?
O1 C16 H16A 109.2 . . ?
C14 C16 H16A 109.2 . . ?
O1 C16 H16B 109.2 . . ?
C14 C16 H16B 109.2 . . ?
H16A C16 H16B 107.9 . . ?
C18 C17 C21 116.6(3) . . ?
C18 C17 C10 124.7(3) . . ?
C21 C17 C10 118.7(3) . . ?
C17 C18 C19 119.5(3) . . ?
C17 C18 H18 120.3 . . ?
C19 C18 H18 120.3 . . ?
C20 C19 C18 118.6(3) . . ?
C20 C19 H19 120.7 . . ?
C18 C19 H19 120.7 . . ?
N4 C20 C19 122.7(3) . . ?
N4 C20 C22 113.5(3) . . ?
C19 C20 C22 123.8(3) . . ?
N4 C21 C17 124.6(3) . . ?
N4 C21 H21 117.7 . . ?
C17 C21 H21 117.7 . . ?
O2 C22 C20 110.3(3) . . ?
O2 C22 H22B 109.6 . . ?
C20 C22 H22B 109.6 . . ?
O2 C22 H22A 109.6 . . ?
C20 C22 H22A 109.6 . . ?
H22B C22 H22A 108.1 . . ?
 
_refine_diff_density_max    0.741
_refine_diff_density_min   -0.500
_refine_diff_density_rms    0.190

_shelx_res_file
;
TITL Fe-THPP
    FE-THPP.res
    created by SHELXL-2016/6 at 14:20:01 on 16-Jan-2023
CELL 1.34138 9.8772 9.1364 20.2948 90 103.3415 90
ZERR 2 0.0004 0.0003 0.0007 0 0.0017 0
LATT 1
SYMM -X,0.5+Y,0.5-Z
SFAC C H Fe N O
UNIT 88 64 2 16 8
DELU 0.001 0.001 C20 N4

L.S. 20
PLAN  99
fmap 2 53
BOND $H
acta
size 0.08 0.10 0.15
temp -120

WGHT    0.121800    0.361800
FVAR       0.63523
FE1   3    0.500000    0.500000    0.500000    10.50000    0.05774    0.03111 =
         0.02715    0.00193    0.00370   -0.00633
O1    5    0.665060    0.131721    0.970456    11.00000    0.06502    0.04587 =
         0.03331    0.00006    0.00944   -0.00167
H1    2    0.720534    0.169603    1.004151    11.00000   -1.50000
O2    5    1.105552    1.345025    0.672019    11.00000    0.11903    0.07936 =
         0.07664    0.01134   -0.01627   -0.04240
AFIX 147
H2    2    1.148543    1.424874    0.674301    11.00000   -1.50000
AFIX   0
N1    4    0.444626    0.316260    0.545663    11.00000    0.05307    0.03233 =
         0.03044    0.00162    0.00447   -0.00113
N2    4    0.636649    0.560139    0.589584    11.00000    0.05444    0.03247 =
         0.02816    0.00125    0.00422   -0.00203
N3    4    0.771307    0.133682    0.811286    11.00000    0.06773    0.07037 =
         0.04096    0.01636    0.01643    0.02427
N4    4    0.802991    1.192205    0.571102    11.00000    0.07033    0.04119 =
         0.05402   -0.00144    0.01318   -0.01010
C1    1    0.349691    0.212652    0.516456    11.00000    0.05393    0.03150 =
         0.03447    0.00117    0.00680   -0.00361
C2    1    0.329528    0.110550    0.568018    11.00000    0.06814    0.04221 =
         0.03974    0.00413    0.00963   -0.01405
AFIX  43
H2A   2    0.268086    0.029103    0.561573    11.00000   -1.20000
AFIX   0
C3    1    0.415149    0.153370    0.627331    11.00000    0.07152    0.04001 =
         0.03474    0.00591    0.00813   -0.00993
AFIX  43
H3    2    0.425286    0.107153    0.670126    11.00000   -1.20000
AFIX   0
C4    1    0.487658    0.282154    0.613028    11.00000    0.05737    0.03267 =
         0.03022    0.00328    0.00701   -0.00122
C5    1    0.586645    0.358154    0.661215    11.00000    0.05555    0.03605 =
         0.02877    0.00367    0.00560    0.00223
C6    1    0.652734    0.488540    0.650322    11.00000    0.05636    0.03745 =
         0.02851    0.00112    0.00484   -0.00171
C7    1    0.744092    0.573176    0.702212    11.00000    0.07200    0.04603 =
         0.02900    0.00279    0.00085   -0.00791
AFIX  43
H7    2    0.774269    0.547348    0.748633    11.00000   -1.20000
AFIX   0
C8    1    0.778856    0.695634    0.672823    11.00000    0.06606    0.04468 =
         0.03509   -0.00163    0.00138   -0.01041
AFIX  43
H8    2    0.836078    0.773105    0.694759    11.00000   -1.20000
AFIX   0
C9    1    0.712721    0.686531    0.601899    11.00000    0.05632    0.03523 =
         0.03249   -0.00007    0.00462   -0.00250
C10   1    0.719897    0.793467    0.552228    11.00000    0.05287    0.03241 =
         0.03672   -0.00001    0.00650   -0.00354
C11   1    0.624086    0.293892    0.731249    11.00000    0.05620    0.03679 =
         0.02998    0.00162    0.00612   -0.00290
C12   1    0.549178    0.324485    0.778906    11.00000    0.06185    0.04212 =
         0.03547    0.00409    0.00832    0.00753
AFIX  43
H12   2    0.470351    0.387033    0.767849    11.00000   -1.20000
AFIX   0
C13   1    0.588914    0.263848    0.843179    11.00000    0.06686    0.04145 =
         0.03544    0.00499    0.01706    0.00843
AFIX  43
H13   2    0.539650    0.286923    0.876877    11.00000   -1.20000
AFIX   0
C14   1    0.699847    0.170540    0.857275    11.00000    0.05537    0.03696 =
         0.03112    0.00266    0.00685   -0.00042
C15   1    0.733869    0.197824    0.749850    11.00000    0.07548    0.07045 =
         0.03587    0.01374    0.01910    0.02214
AFIX  43
H15   2    0.786441    0.175363    0.717425    11.00000   -1.20000
AFIX   0
C16   1    0.749747    0.097579    0.925489    11.00000    0.05880    0.04761 =
         0.03551    0.00849    0.00941    0.00698
AFIX  23
H16A  2    0.750566   -0.009822    0.919127    11.00000   -1.20000
H16B  2    0.846312    0.129198    0.945600    11.00000   -1.20000
AFIX   0
C17   1    0.802525    0.928691    0.574106    11.00000    0.05533    0.03712 =
         0.03624   -0.00079    0.00751   -0.00953
C18   1    0.940963    0.930499    0.607380    11.00000    0.05938    0.04913 =
         0.05134    0.00480    0.00302   -0.00560
AFIX  43
H18   2    0.990193    0.841326    0.618917    11.00000   -1.20000
AFIX   0
C19   1    1.008287    1.064465    0.623998    11.00000    0.05690    0.08272 =
         0.04790    0.00660   -0.00285   -0.02307
AFIX  43
H19   2    1.102687    1.067924    0.648397    11.00000   -1.20000
AFIX   0
C20   1    0.934702    1.191939    0.604204    11.00000    0.07501    0.05157 =
         0.04465    0.00042    0.01073   -0.01721
C21   1    0.738459    1.063806    0.558724    11.00000    0.05645    0.03834 =
         0.04800   -0.00059    0.01060   -0.00673
AFIX  43
H21   2    0.641873    1.064599    0.537925    11.00000   -1.20000
AFIX   0
C22   1    0.997939    1.345378    0.616726    11.00000    0.08715    0.06841 =
         0.07032    0.00348   -0.00040   -0.03184
AFIX  23
H22B  2    1.031221    1.377552    0.576630    11.00000   -1.20000
H22A  2    0.925936    1.415306    0.623672    11.00000   -1.20000
AFIX   0
HKLF 4


REM  Fe-THPP
REM R1 =  0.0533 for    3254 Fo > 4sig(Fo)  and  0.0716 for all    4087 data
REM    263 parameters refined using      1 restraints

END

WGHT      0.1249      0.3180

REM Highest difference peak  0.741,  deepest hole -0.500,  1-sigma level  0.190
Q1    1   0.9997  1.4171  0.6678  11.00000  0.05    0.74
Q2    1   1.0853  1.2683  0.6394  11.00000  0.05    0.65
Q3    1   0.7278  0.2869  0.7570  11.00000  0.05    0.49
Q4    1   1.0089  1.1566  0.6229  11.00000  0.05    0.49
Q5    1   0.8802  0.1541  0.8205  11.00000  0.05    0.47
Q6    1   1.0690  0.9966  0.6236  11.00000  0.05    0.46
Q7    1   0.8632  0.2141  0.7385  11.00000  0.05    0.44
Q8    1   0.9400  0.1285  0.7819  11.00000  0.05    0.42
Q9    1   0.9609  0.0597  0.7598  11.00000  0.05    0.42
Q10   1   0.9423  0.1449  0.7184  11.00000  0.05    0.41
Q11   1   0.9814  1.4265  0.7398  11.00000  0.05    0.41
Q12   1   0.8439  0.2174  0.7764  11.00000  0.05    0.41
Q13   1   0.9067  0.0917  0.7396  11.00000  0.05    0.41
Q14   1   0.7592  0.1809  0.7777  11.00000  0.05    0.40
Q15   1   0.8622  0.0604  0.8042  11.00000  0.05    0.40
Q16   1   0.9363  0.2391  0.7942  11.00000  0.05    0.40
Q17   1   1.0100  1.0779  0.7231  11.00000  0.05    0.40
Q18   1   0.9135  0.7377  0.6862  11.00000  0.05    0.39
Q19   1   0.9130  0.5014  0.7457  11.00000  0.05    0.39
Q20   1   0.9347  0.7670  0.7226  11.00000  0.05    0.39
Q21   1   0.9060  0.6940  0.6994  11.00000  0.05    0.38
Q22   1   0.8304  0.6107  0.6974  11.00000  0.05    0.38
Q23   1   0.9694  0.6143  0.7476  11.00000  0.05    0.37
Q24   1   0.9723  0.8150  0.7445  11.00000  0.05    0.37
Q25   1   0.9669  1.4369  0.5857  11.00000  0.05    0.37
Q26   1   0.9279  0.2443  0.7593  11.00000  0.05    0.37
Q27   1   0.7919  0.2288  0.8171  11.00000  0.05    0.37
Q28   1   0.8615  0.4540  0.7267  11.00000  0.05    0.36
Q29   1   0.9257  0.5897  0.6891  11.00000  0.05    0.36
Q30   1   0.9521  0.2537  0.7255  11.00000  0.05    0.36
Q31   1   0.9974  0.9801  0.6825  11.00000  0.05    0.34
Q32   1   0.8754  0.4056  0.7567  11.00000  0.05    0.34
Q33   1   1.0361  1.2610  0.7043  11.00000  0.05    0.34
Q34   1   1.0259  0.8854  0.7228  11.00000  0.05    0.34
Q35   1   0.9162  0.8739  0.7452  11.00000  0.05    0.33
Q36   1   0.9195  0.9201  0.7022  11.00000  0.05    0.33
Q37   1   0.8820  0.0268  0.7198  11.00000  0.05    0.33
Q38   1   0.8724  0.3059  0.7053  11.00000  0.05    0.33
Q39   1   0.7587  0.6560  0.6974  11.00000  0.05    0.32
Q40   1   0.9654  1.5405  0.6458  11.00000  0.05    0.32
Q41   1   1.1635  1.5255  0.7372  11.00000  0.05    0.32
Q42   1   0.7979  0.1229  0.7237  11.00000  0.05    0.30
Q43   1   1.1364  1.2218  0.6956  11.00000  0.05    0.30
Q44   1   0.9351  0.8427  0.6642  11.00000  0.05    0.29
Q45   1   0.8718  0.9072  0.5852  11.00000  0.05    0.29
Q46   1   0.9682  0.8727  0.5989  11.00000  0.05    0.29
Q47   1   0.8562  0.8407  0.7276  11.00000  0.05    0.29
Q48   1   0.8599  1.1630  0.6150  11.00000  0.05    0.27
Q49   1   0.7397  0.5570  0.7201  11.00000  0.05    0.27
Q50   1   1.0872  1.5451  0.6442  11.00000  0.05    0.27
Q51   1   0.7445  0.5046  0.6790  11.00000  0.05    0.27
Q52   1   0.6883  0.2422  0.8547  11.00000  0.05    0.27
Q53   1   0.6209  0.3332  0.7613  11.00000  0.05    0.27
Q54   1   0.9203  0.9764  0.6480  11.00000  0.05    0.26
Q55   1   0.8060  0.9617  0.7196  11.00000  0.05    0.26
Q56   1   1.0571  0.8823  0.6790  11.00000  0.05    0.25
Q57   1   0.9441  1.2357  0.6129  11.00000  0.05    0.25
Q58   1   0.5930  0.3146  0.8166  11.00000  0.05    0.24
Q59   1   0.4230  0.3427  0.7594  11.00000  0.05    0.24
Q60   1   0.9985  0.6552  0.6234  11.00000  0.05    0.23
Q61   1   0.7848  0.0181  0.8165  11.00000  0.05    0.22
Q62   1   1.2414  1.4175  0.7523  11.00000  0.05    0.22
Q63   1   1.1363  0.9618  0.6813  11.00000  0.05    0.22
Q64   1   0.7792  0.8525  0.5651  11.00000  0.05    0.21
Q65   1   1.2403  1.3550  0.6978  11.00000  0.05    0.21
Q66   1   0.8584  0.0720  0.9368  11.00000  0.05    0.20
Q67   1   0.8227  0.5815  0.7972  11.00000  0.05    0.19
Q68   1   0.9414  0.9544  0.5624  11.00000  0.05    0.19
Q69   1   0.7065  0.4809  0.7428  11.00000  0.05    0.19
Q70   1   1.2806  1.3490  0.7413  11.00000  0.05    0.17
Q71   1   1.0711  1.5160  0.5861  11.00000  0.05    0.17
Q72   1   0.3133  0.3829  0.7248  11.00000  0.05    0.17
Q73   1   0.7412  0.6507  0.7850  11.00000  0.05    0.17
Q74   1   0.8441  1.3024  0.5894  11.00000  0.05    0.17
Q75   1   0.8186  1.0137  0.6611  11.00000  0.05    0.17
Q76   1   0.6145  0.1877  0.8401  11.00000  0.05    0.16
Q77   1   0.6186  0.4200  0.6579  11.00000  0.05    0.16
Q78   1   0.6713  0.3336  0.6805  11.00000  0.05    0.16
Q79   1   0.7605  0.9976  0.6033  11.00000  0.05    0.16
Q80   1   0.8054  1.2924  0.6412  11.00000  0.05    0.15
Q81   1   0.7804  1.0788  0.6007  11.00000  0.05    0.15
Q82   1   0.3405  0.3618  0.7782  11.00000  0.05    0.15
Q83   1   0.9770  0.1589  0.9187  11.00000  0.05    0.14
Q84   1   1.1918  1.3624  0.6354  11.00000  0.05    0.14
Q85   1   0.9077  1.5243  0.5801  11.00000  0.05    0.14
Q86   1   1.2414  1.1579  0.6665  11.00000  0.05    0.13
Q87   1   0.4091  0.2115  0.7732  11.00000  0.05    0.13
Q88   1   0.3868  0.4238  0.7739  11.00000  0.05    0.12
Q89   1   0.3537  0.1034  0.6827  11.00000  0.05    0.12
Q90   1   0.3620  0.1919  0.6811  11.00000  0.05    0.10
Q91   1   1.2745  1.3314  0.6464  11.00000  0.05    0.10
Q92   1   0.6660  0.0889  0.7834  11.00000  0.05    0.10
Q93   1   0.4623  0.2210  0.6271  11.00000  0.05    0.10
Q94   1   0.6550  0.5034  0.6273  11.00000  0.05    0.10
Q95   1   0.5285  0.3364  0.6429  11.00000  0.05    0.09
Q96   1   0.3990  0.5540  0.7742  11.00000  0.05    0.09
Q97   1   0.3354  0.1372  0.6036  11.00000  0.05    0.08
Q98   1   0.2943  0.2454  0.6426  11.00000  0.05    0.08
Q99   1   0.3372  0.1980  0.7125  11.00000  0.05    0.08
;
_shelx_res_checksum   64427

_shelx_hkl_file
;
  -1   0   0 -0.1488 0.21991   8
  -2   0   0 779.188 36.6232   8
   2   0   0 701.210 37.1371   5
   2   0   0 755.692 36.5845   8
  -2   0   0 765.857 37.2098   5
  -3   0   0 1119.88 53.6471   8
  -3   0   0 1078.89 54.4491   5
  -4   0   0 2191.34 108.037  10
  -4   0   0 2193.51 108.649   5
  -4   0   0 2270.32 109.570   8
  -5   0   0 31.7279 3.96756   3
  -5   0   0 32.7957 3.46935   8
  -5   0   0 38.5513 4.10929  10
  -6   0   0 10.9723 3.12113  10
  -6   0   0 14.1475 3.15939   3
  -6   0   0 11.3916 2.31209   8
  -7   0   0 179.472 11.3207   3
  -7   0   0 149.745 9.97500   8
  -7   0   0 166.816 11.0888  10
   8   0   0 85.1184 7.16966   4
  -8   0   0 80.3151 6.57328   8
  -8   0   0 90.0847 8.20352   3
   9   0   0 6.63294 3.20547   4
  -9   0   0 3.81081 4.10473   3
 -10   0   0 9.29290 4.61878   3
  10   0   0 6.37374 3.36752   6
  11   0   0 -0.0908 2.55064   6
  12   0   0 13.0585 3.34216   6
   0  -1   0 -0.0217 0.34347   8
   0   1   0 0.22350 0.38353   8
   1  -1   0 157.779 8.51980   8
  -1  -1   0 169.925 8.60266   5
   1   1   0 174.982 8.68081   5
  -1   1   0 162.115 8.54941   8
  -2  -1   0 177.567 9.47707   5
  -2  -1   0 172.455 8.65859   8
   2  -1   0 166.175 9.15063   8
  -2   1   0 175.547 9.23305   8
   2   1   0 173.903 9.60369   5
  -3  -1   0 61.0428 4.56750  10
  -3  -1   0 69.1655 5.01056   5
  -3  -1   0 67.4820 3.82848   8
  -3   1   0 65.0341 4.44950   8
  -3   1   0 55.7125 5.07197   5
  -3   1   0 57.4427 4.24814  10
   3   1   0 65.7990 5.17746   5
  -4  -1   0 102.933 5.62652   8
  -4  -1   0 96.6633 6.52157  10
  -4  -1   0 96.9930 6.80060   5
  -4   1   0 95.5153 7.21655   5
  -4   1   0 94.1726 6.19468   8
  -4   1   0 92.0937 6.22090  10
   4   1   0 86.8594 7.06133   5
  -5  -1   0 14.4629 2.09193   8
  -5  -1   0 13.0106 2.89016   3
  -5  -1   0 15.3036 3.22435  10
  -5   1   0 12.7792 2.47001   8
  -5   1   0 14.8345 3.00971   3
  -5   1   0 11.1356 2.64640  10
  -6  -1   0 105.552 6.77226   8
   6  -1   0 95.9102 7.21375   4
  -6  -1   0 108.867 7.92331   3
  -6  -1   0 109.104 7.99301  10
  -6   1   0 110.323 7.91195  10
  -6   1   0 116.624 7.53173   8
  -6   1   0 119.599 8.11102   3
   7  -1   0 11.5116 3.19231   4
  -7  -1   0 20.1514 4.27902   3
  -7  -1   0 9.73450 2.15061   8
  -7   1   0 14.3738 2.92607   8
  -7   1   0 16.7684 3.53889  10
  -7   1   0 20.8238 4.28485   3
   8  -1   0 10.3822 3.27620   4
  -8  -1   0 7.41262 4.01738   3
  -8   1   0 0.19271 2.89923   8
  -8   1   0 13.9751 4.31013   3
   9  -1   0 6.49010 3.71699   6
  -9  -1   0 6.10070 4.08473   3
  -9   1   0 4.81927 3.92308   3
  10  -1   0 2.02956 3.21758   6
 -10  -1   0 -0.2046 3.92624   3
  10   1   0 -1.1199 2.93120   4
 -10   1   0 2.52557 3.78928   3
  11  -1   0 1.11109 2.61026   6
  11   1   0 3.94179 2.68384   6
 -11   1   0 2.42507 3.40482   3
 -12  -1   0 1.02170 1.62461   9
  12  -1   0 4.22024 3.30324   6
  12   1   0 2.65261 2.18058   6
   0  -2   0 2428.11 116.874   1
  -1  -2   0 463.304 21.8962   5
   1   2   0 439.447 21.9617   5
   1   2   0 438.919 21.2965   8
  -1   2   0 417.767 21.9019   8
   2   2   0 352.884 17.7984   5
  -2   2   0 331.084 17.5235   8
  -3  -2   0 20.9043 2.93730   5
  -3   2   0 18.6301 2.21210  10
  -3   2   0 21.5057 2.76576   8
   3   2   0 19.6775 3.03682   5
  -4  -2   0 255.874 13.7747   5
  -4  -2   0 259.341 12.1705   8
  -4   2   0 217.957 13.1157   3
   4   2   0 256.450 14.2605   5
  -4   2   0 260.886 13.5626   8
  -4   2   0 210.373 14.1595   5
  -4   2   0 232.262 13.0476  10
  -5  -2   0 117.931 7.78786   3
  -5  -2   0 121.587 6.46515   8
  -5   2   0 115.834 7.87427   8
  -5   2   0 117.832 7.80831   3
   5   2   0 112.880 8.70717   5
  -6  -2   0 340.598 17.0892   8
  -6  -2   0 343.928 18.7368   3
  -6   2   0 352.798 18.8244   3
   6   2   0 303.957 19.4385   5
  -6   2   0 348.815 18.7066   8
  -6   2   0 329.233 18.4032  10
   7  -2   0 258.187 15.8283   6
  -7  -2   0 282.060 15.9327   3
  -7   2   0 268.589 15.5050  10
  -7   2   0 277.260 16.0850   3
  -7   2   0 251.318 15.4636   8
   8  -2   0 167.593 11.7880   6
  -8  -2   0 186.875 12.2148   3
  -8   2   0 160.684 11.8094   3
  -9  -2   0 19.3722 5.21246   3
   9  -2   0 7.35111 3.82617   6
  -9   2   0 14.0544 4.63161   3
  10  -2   0 1.91323 3.38143   6
  10   2   0 1.33174 2.97749   4
 -10   2   0 0.28705 3.70330   3
  11  -2   0 0.83110 3.06703   6
 -11  -2   0 1.91282 2.25626   9
 -11   2   0 1.07588 3.24132   3
  11   2   0 4.59008 2.63996   4
  12  -2   0 17.9328 3.14206   6
 -12  -2   0 16.0360 2.30703   9
  12   2   0 18.8714 2.56377   6
   0   3   0 0.87584 1.17532   5
   0   3   0 0.14153 0.90527   8
  -1   3   0 22.9168 2.61819   8
   1   3   0 21.7488 1.70358   8
   1   3   0 21.7129 2.59170   5
  -2  -3   0 54.7153 3.97329   5
  -2   3   0 55.3095 4.21773   8
   2   3   0 51.7684 4.96298   5
   3  -3   0 781.471 39.8556   6
  -3  -3   0 805.369 39.6563   5
   3   3   0 850.141 40.2034   5
  -3   3   0 829.963 39.8528   8
  -3   3   0 705.177 39.0153  10
   4  -3   0 19.1555 2.96857   6
  -4  -3   0 10.7899 2.36191   3
  -4  -3   0 11.6655 2.25748   5
  -4   3   0 17.1271 3.00871   8
  -4   3   0 13.9335 2.14717  10
   4   3   0 14.0988 2.95695   5
  -4   3   0 16.7667 2.61919   3
  -5  -3   0 22.3171 3.24965   3
   5  -3   0 22.5047 2.54685   2
   5  -3   0 14.1755 3.27719   6
  -5   3   0 14.7988 2.97869   3
  -5   3   0 11.3294 2.65519  10
  -5   3   0 18.4581 3.32248   8
   5   3   0 11.8964 3.07720   5
   6  -3   0 214.361 13.0988   6
  -6  -3   0 210.593 12.8525   3
  -6   3   0 229.418 13.0122   3
  -6   3   0 201.586 12.2384  10
  -6   3   0 210.987 12.8844   8
   6   3   0 198.511 13.5826   5
   7  -3   0 3.32602 3.26410   6
  -7  -3   0 0.56684 2.84396   3
  -7   3   0 -2.4262 1.83544  10
  -7   3   0 5.51229 3.27072   3
  -7   3   0 1.52047 2.31097   8
   8  -3   0 -0.9069 3.06802   6
  -8   3   0 0.35232 3.19532   3
   9  -3   0 19.8956 4.41172   6
  -9   3   0 25.1818 5.01869   3
  10  -3   0 4.30786 3.48596   6
 -10  -3   0 0.55183 2.41720   9
 -10   3   0 1.31194 3.38874   3
 -11  -3   0 1.57295 2.43405   9
  11  -3   0 1.83034 3.18402   6
 -11   3   0 1.84823 3.11678   3
  11   3   0 1.60507 2.47319   4
 -12  -3   0 -2.8234 1.48389   9
  12  -3   0 -0.5183 2.05068   6
   0   4   0 117.112 6.88350   5
   0   4   0 106.686 6.45318   8
   1  -4   0 941.023 50.1772   6
   1  -4   0 967.294 49.6979   2
   1   4   0 1075.25 50.0596   5
  -1   4   0 1043.65 49.9242   8
   1   4   0 1026.70 49.1560   8
  -2  -4   0 558.142 26.8385   5
   2  -4   0 514.686 26.0318   9
   2  -4   0 499.729 27.1935   6
  -2  -4   0 509.698 26.9567   6
  -2  -4   0 514.266 26.1060   9
   2  -4   0 515.678 26.6074   2
  -2   4   0 545.754 27.0703   8
   2   4   0 563.552 27.2316   5
   3  -4   0 678.740 32.5764   9
   3  -4   0 671.449 33.1560   2
   3  -4   0 675.047 33.9418   6
  -3  -4   0 647.905 32.6193   9
  -3  -4   0 680.521 33.4789   5
   3   4   0 686.430 34.0551   5
  -3   4   0 578.905 32.6221  10
  -3   4   0 682.417 33.7931   8
   4  -4   0 130.530 8.64116   6
   4  -4   0 136.656 7.56841   2
  -4  -4   0 125.654 7.18182   9
  -4   4   0 114.931 7.65435   3
  -4   4   0 113.967 7.19897  10
   4   4   0 124.249 8.80016   5
  -4   4   0 132.273 8.58843   8
   5  -4   0 243.993 14.4523   6
  -5  -4   0 265.181 13.4125   9
   5  -4   0 249.022 13.2164   2
  -5   4   0 235.185 13.7660   3
  -5   4   0 251.861 14.4711   8
   5   4   0 229.039 14.7729   5
  -5   4   0 226.596 13.1995  10
  -6  -4   0 184.088 9.71987   9
   6  -4   0 167.797 9.51483   2
   6  -4   0 177.523 11.4808   6
  -6   4   0 167.340 10.6995   3
  -6   4   0 161.425 10.9338   8
  -6   4   0 153.613 9.78696  10
   6   4   0 153.969 11.3937   5
   7  -4   0 211.139 14.1043   6
  -7  -4   0 229.412 12.6419   9
  -7   4   0 228.822 13.8571   3
   8  -4   0 83.9718 8.46924   6
  -8  -4   0 97.3851 6.99613   9
  -8   4   0 86.3620 8.11516   3
   9  -4   0 99.7563 9.24592   6
  -9  -4   0 113.062 7.70890   9
  -9   4   0 109.580 9.14140   3
  10  -4   0 9.28070 4.90871   6
 -10   4   0 8.19752 3.62356   3
 -11  -4   0 2.41821 2.05370   9
  11  -4   0 -0.0398 2.47910   6
  11   4   0 4.16767 2.65061   4
 -11   4   0 -1.7318 2.50500   3
   0  -5   0 0.16124 1.66029   6
   0  -5   0 -0.8954 1.49951   2
   0  -5   0 -0.7763 0.93717   9
   0   5   0 0.04885 1.06744   8
   0   5   0 1.37071 1.47572   5
  -1  -5   0 397.197 20.5593   9
  -1  -5   0 410.882 21.1792   2
   1  -5   0 417.455 21.3075   2
   1  -5   0 412.446 20.5438   9
   1  -5   0 393.322 21.8512   6
  -1  -5   0 392.571 21.6703   6
   1   5   0 404.618 20.4832   8
  -1   5   0 420.586 21.5003   5
   1   5   0 437.336 21.6622   5
  -1   5   0 421.991 21.4250   8
   2  -5   0 7.28639 2.53583   6
  -2  -5   0 7.55937 1.56162   9
   2  -5   0 7.75172 1.46612   9
   2  -5   0 6.31941 2.08890   2
  -2  -5   0 5.07026 2.12161   6
  -2  -5   0 8.54027 1.85617   2
   2   5   0 6.96045 2.27129   5
  -2   5   0 10.7386 2.44365   8
   3  -5   0 65.0046 5.84921   6
  -3  -5   0 69.9069 4.63255   2
   3  -5   0 62.6309 4.24805   9
  -3  -5   0 68.5108 4.50452   9
  -3  -5   0 65.1947 5.26982   6
   3  -5   0 68.8215 5.10336   2
  -3   5   0 63.2797 5.52772   8
   3   5   0 61.1028 5.62234   5
   4  -5   0 36.7303 4.02553   2
  -4  -5   0 36.8666 3.80744   9
   4  -5   0 37.1428 4.94499   6
  -4   5   0 27.9047 3.53208   3
   4   5   0 44.0034 4.87785   5
  -4   5   0 41.9606 4.81006   8
  -5  -5   0 4.78334 1.98347   9
   5  -5   0 4.45663 2.11120   2
   5  -5   0 7.29464 3.31487   6
  -5   5   0 2.11720 2.43242   3
  -5   5   0 9.54383 2.76378   8
   5   5   0 8.49024 3.05778   5
   6  -5   0 86.4044 6.12434   2
   6  -5   0 84.1530 7.94521   6
  -6  -5   0 92.9170 6.21912   9
   6   5   0 84.0015 8.06689   5
  -6   5   0 77.4267 6.78569   3
  -7  -5   0 45.5367 4.91924   9
   7  -5   0 40.1124 5.79807   6
  -7   5   0 41.7404 5.47426   3
   8  -5   0 8.84710 3.98854   6
  -8  -5   0 9.10634 2.84726   9
  -8   5   0 6.50867 3.12579   3
  -9  -5   0 1.18695 2.55085   9
   9  -5   0 2.74578 3.59690   6
  -9   5   0 4.28995 2.99035   3
  10  -5   0 1.89672 2.98285   6
 -10  -5   0 0.39443 2.34445   9
 -10   5   0 1.46563 2.68660   3
  11  -5   0 4.20579 3.18794   6
 -11  -5   0 2.39026 1.70926   9
  11   5   0 -3.8874 1.85565   4
   0  -6   0 887.920 42.5217   2
   0  -6   0 843.630 43.1186   6
   0  -6   0 851.879 41.6044   9
   0   6   0 812.299 42.6861   5
   0   6   0 841.288 42.0791   8
  -1  -6   0 479.997 23.8325   2
  -1  -6   0 463.941 24.4459   6
   1  -6   0 469.889 24.6431   6
  -1  -6   0 464.065 22.9857   9
   1  -6   0 462.739 22.9473   9
  -1   6   0 441.018 23.9900   5
   1   6   0 434.031 24.2452   5
  -1   6   0 467.228 23.8732   8
   1   6   0 442.092 22.7494   8
   2  -6   0 323.866 18.6439   6
  -2  -6   0 328.860 17.5547   2
  -2  -6   0 318.286 18.1153   6
   2  -6   0 338.252 17.7817   2
  -2  -6   0 343.199 17.0639   9
   2  -6   0 344.782 16.8606   9
  -2   6   0 330.633 18.0173   8
   2   6   0 309.477 18.1499   5
  -2   6   0 322.448 17.9828   5
   3  -6   0 178.409 11.5306   6
   3  -6   0 174.454 10.5092   2
  -3  -6   0 169.786 10.0343   2
  -3  -6   0 185.811 10.8277   6
   3  -6   0 171.010 9.48783   9
  -3  -6   0 174.898 9.72954   9
  -3   6   0 179.542 10.9587   8
   3   6   0 164.032 11.0489   5
   4  -6   0 48.1142 4.92694   2
   4  -6   0 45.8397 5.68264   6
  -4  -6   0 42.2793 4.73596   6
  -4  -6   0 42.3519 4.07317   9
  -4   6   0 48.3218 4.30511   3
  -4   6   0 40.9377 4.80798   8
   4   6   0 44.4522 5.54650   5
   5  -6   0 140.921 10.3310   6
   5  -6   0 129.606 8.67768   2
  -5  -6   0 135.195 8.20278   9
  -5   6   0 131.567 8.49639   3
   6  -6   0 72.1227 7.40548   6
   6  -6   0 71.1822 5.69017   2
  -6   6   0 60.0929 5.67913   3
  -7  -6   0 5.40947 2.73698   9
   7  -6   0 2.40078 3.41110   6
  -7   6   0 3.35246 2.53360   3
   8  -6   0 7.94335 3.71296   6
  -8  -6   0 2.95370 2.44713   9
  -8   6   0 3.84630 2.70941   3
   9  -6   0 -1.4286 2.89236   6
  -9  -6   0 1.00488 2.27031   9
  -9   6   0 -1.2342 2.22394   3
 -10  -6   0 25.6197 3.09766   9
  10  -6   0 27.7308 4.34220   6
   0  -7   0 -1.4729 2.17031   2
   0  -7   0 -0.2116 1.40560   9
   0  -7   0 4.33513 2.72136   6
   0   7   0 0.82910 1.86057   5
   0   7   0 -0.4606 1.38971   8
   1  -7   0 10.2095 3.29868   6
   1  -7   0 12.8045 3.07953   2
  -1  -7   0 12.4881 2.96845   2
  -1  -7   0 15.5490 3.56784   6
  -1  -7   0 15.2326 2.25888   9
   1  -7   0 10.4243 1.99233   9
   1   7   0 15.8005 2.88561   5
  -1   7   0 11.6834 2.44801   8
  -1   7   0 10.2278 2.55401   5
  -2  -7   0 4.48215 2.66532   6
   2  -7   0 2.19495 2.50003   2
  -2  -7   0 2.99528 1.74839   9
   2  -7   0 8.59286 2.02441   9
   2  -7   0 1.99043 2.92937   6
  -2  -7   0 2.57277 2.16438   2
   2   7   0 2.17366 2.06298   5
  -2   7   0 5.56109 2.49357   5
  -2   7   0 1.34686 1.77419   8
   3  -7   0 0.23176 2.41215   2
   3  -7   0 1.03087 1.67056   9
   3  -7   0 2.55983 2.95823   6
  -3  -7   0 0.75208 1.78807   2
  -3  -7   0 -1.7552 2.23881   6
  -3  -7   0 1.67146 1.76066   9
   3   7   0 -0.3757 2.13787   5
  -4  -7   0 13.5522 2.61223   9
   4  -7   0 9.43079 3.97521   6
   4  -7   0 7.50887 2.98164   2
  -5  -7   0 10.7189 2.57009   9
   5  -7   0 15.9811 3.57941   2
   5  -7   0 20.3603 4.67159   6
  -6  -7   0 0.14361 2.11237   9
   6  -7   0 0.02591 3.35815   6
  -6   7   0 2.65768 3.07359   3
  -7  -7   0 44.2457 4.59760   9
   7  -7   0 28.7345 5.28116   6
  -7   7   0 31.9875 3.90461   3
   8  -7   0 1.42522 6.82648   6
  -8  -7   0 2.32811 2.82685   9
  -8   7   0 0.26523 2.51770   3
  -9  -7   0 -1.5902 2.13989   9
   9  -7   0 -0.9238 2.96730   6
 -10  -7   0 11.5195 1.95749   9
  10  -7   0 5.21047 2.69871   6
   0  -8   0 174.338 9.55648   9
   0  -8   0 177.657 11.0126   2
   0  -8   0 154.670 11.4182   6
   1  -8   0 169.185 10.8853   2
   1  -8   0 178.673 11.8625   6
  -1  -8   0 161.460 11.1308   6
  -1  -8   0 167.531 10.7071   2
   1  -8   0 159.157 9.35832   9
  -1  -8   0 165.778 9.45787   9
   2  -8   0 220.728 12.1609   9
   2  -8   0 247.250 17.5647   6
  -2  -8   0 219.202 13.8153   6
  -2  -8   0 216.703 13.1583   2
  -2  -8   0 235.710 12.3373   9
  -3  -8   0 43.7846 4.26357   9
  -3  -8   0 37.3225 5.02446   6
   3  -8   0 43.0652 5.99224   6
   3  -8   0 37.4179 4.85486   2
  -4  -8   0 9.75851 2.35775   9
   4  -8   0 5.14439 3.97307   6
   4  -8   0 3.21732 2.77698   2
  -5  -8   0 55.3844 4.96399   9
   5  -8   0 65.4576 7.45004   6
   5  -8   0 54.2874 5.67761   2
   6  -8   0 77.4047 8.11423   6
  -6  -8   0 80.3017 5.89327   9
   7  -8   0 30.2632 5.52881   6
  -7  -8   0 36.8856 3.86684   9
   8  -8   0 14.1538 3.94297   6
  -8  -8   0 11.5170 2.24508   9
   9  -8   0 -0.2783 3.19681   6
  -9  -8   0 1.92079 1.45336   9
   0  -9   0 3.28768 3.12817   6
   0  -9   0 2.05224 2.65232   2
   0  -9   0 1.70992 1.88871   9
   1  -9   0 62.5968 6.97338   6
  -1  -9   0 66.3319 6.08933   2
   1  -9   0 59.7340 4.82965   9
  -1  -9   0 64.3393 4.91575   9
   1  -9   0 64.7200 6.20041   2
  -1  -9   0 62.9126 6.53174   6
   2  -9   0 61.0462 7.14393   6
  -2  -9   0 48.6431 6.18176   6
  -2  -9   0 52.5267 4.63672   9
   2  -9   0 57.0366 4.49320   9
   2  -9   0 62.2434 6.26448   2
  -3  -9   0 -3.4461 2.08972   6
  -3  -9   0 -1.8922 1.81502   9
   3  -9   0 -0.3331 2.77375   2
   3  -9   0 1.44026 3.59249   6
  -4  -9   0 3.42700 2.01190   9
   4  -9   0 3.64593 3.67173   6
  -5  -9   0 -3.3074 1.99409   9
   5  -9   0 0.91710 3.21172   6
  -6  -9   0 -1.5712 1.89265   9
   6  -9   0 -1.2524 2.89894   6
  -7  -9   0 12.8118 2.16148   9
   7  -9   0 9.33896 3.13527   6
   8  -9   0 2.34072 2.81171   6
  -8  -9   0 1.96518 1.47123   9
   0 -10   0 119.658 7.06731   9
   0 -10   0 116.164 9.13915   6
   1 -10   0 70.5255 4.78024   9
   1 -10   0 62.9498 6.83204   6
  -1 -10   0 69.4344 6.55749   6
  -1 -10   0 69.4268 4.90045   9
  -2 -10   0 3.81781 3.01743   6
   2 -10   0 2.58103 3.02723   6
  -3 -10   0 39.9051 3.59467   9
   3 -10   0 34.4857 5.09002   6
   4 -10   0 74.7913 7.21587   6
  -4 -10   0 70.8749 4.89757   9
   5 -10   0 90.1252 7.69344   6
  -5 -10   0 81.5693 5.31042   9
   6 -10   0 31.3134 4.22366   6
  -6 -10   0 27.8859 3.09341   9
   0 -11   0 -0.8429 1.07382   9
   0 -11   0 1.17861 2.19573   6
  -1 -11   0 2.57056 2.07861   6
   1 -11   0 0.76320 2.30461   6
  -1 -11   0 -1.1447 1.19272   9
  -2 -11   0 8.56474 1.68901   9
   2 -11   0 14.6696 3.43479   6
  -3 -11   0 9.01324 1.58144   9
   3 -11   0 9.11639 2.83527   6
  -4 -11   0 4.42356 1.20176   9
   4 -11   0 3.89592 3.33022   6
  12   0  -1 2.60000 2.83870   6
  11   0  -1 -1.6186 2.48423   6
 -10   0   1 -0.2057 3.75313   3
  10   0  -1 -6.1351 2.81597   4
  10   0  -1 -0.5645 2.79118   6
   9   0  -1 7.08635 3.09147   4
  -9   0   1 0.64741 3.75915   3
  -8   0   1 2.96376 2.25494   8
   8   0  -1 -4.9623 2.45925   4
  -8   0   1 4.68948 3.64299   3
  -7   0   1 -3.4091 2.57893   3
  -7   0   1 -1.3045 1.74029   8
  -6   0   1 0.55296 2.35928   3
  -6   0   1 -1.2181 1.41783   8
  -6   0   1 0.94525 2.27424  10
  -5   0   1 1.48191 1.91463  10
  -5   0   1 1.98296 1.81449   3
  -5   0   1 2.60016 2.07001   5
  -5   0   1 0.44109 1.48841   8
  -4   0   1 3.34473 1.81595   8
  -4   0   1 1.31930 1.54555  10
   4   0  -1 -0.3039 1.05306   8
  -4   0   1 0.54313 1.72178   5
  -3   0   1 -0.2393 1.60865   5
  -3   0   1 -0.3680 1.06607   8
  -3   0   1 0.57811 1.14483  10
   3   0  -1 0.14892 1.01005   8
  -2   0   1 0.70769 1.38143   5
   2   0  -1 0.31366 0.83913   8
  -2   0   1 -0.6229 0.83222   8
   1   0  -1 0.53706 0.54479   8
  -1   0   1 -0.0638 0.30644   8
   1   0   1 0.66939 0.73151   5
  -1   0  -1 -0.3988 0.79427   5
  -2   0  -1 0.58569 0.85945   8
   2   0   1 0.49121 1.55827   5
  -2   0  -1 -0.5331 1.46261   5
  -3   0  -1 0.06236 1.65352   5
  -3   0  -1 -0.2650 1.23334  10
  -3   0  -1 0.23164 1.07894   8
  -4   0  -1 -1.3186 1.59745  10
  -4   0  -1 -2.4306 1.66357   5
  -4   0  -1 -0.5868 1.23142   8
  -5   0  -1 1.68603 2.08084   3
  -5   0  -1 1.61893 2.06995  10
  -5   0  -1 -0.0520 1.41930   8
  -6   0  -1 2.78422 2.63095  10
  -6   0  -1 -1.9932 2.30232   3
  -6   0  -1 -0.9576 1.54079   8
  -7   0  -1 -3.4552 4.61354  10
  -7   0  -1 3.13303 2.08812   8
  -7   0  -1 1.96555 2.94509   3
   8   0   1 -0.1896 2.46795   4
  -8   0  -1 4.18336 2.54941   8
  -8   0  -1 -1.4628 3.30866   3
   9   0   1 4.46715 3.16406   4
  -9   0  -1 -7.2365 3.04960   3
 -10   0  -1 -2.5209 3.56347   3
  11   0   1 2.36601 2.83260   6
  12   0   1 -0.1745 1.92671   6
 -12  -1   1 2.99021 2.07605   9
  12   1  -1 5.01032 2.06188   6
  11  -1  -1 4.12377 2.96247   6
  11   1  -1 5.71920 2.90497   6
  11   1  -1 0.43619 2.80727   4
  10  -1  -1 0.24447 3.12975   6
 -10   1   1 -0.3651 3.78355   3
  10   1  -1 5.68823 3.11702   4
   9  -1  -1 18.4436 4.15275   6
   9  -1  -1 11.1500 4.09041   4
  -9  -1   1 26.6069 5.19523   3
  -9   1   1 26.8775 5.23859   3
   8  -1  -1 121.905 9.38220   4
  -8  -1   1 159.583 10.6472   3
  -8   1   1 156.925 10.7681   3
  -8   1   1 131.133 9.50937   8
   7  -1  -1 84.6417 7.03079   4
  -7  -1   1 88.3212 6.28021   8
  -7  -1   1 106.278 8.10622   3
  -7   1   1 101.316 7.89302   3
  -7   1   1 97.7420 7.20007   8
  -6  -1   1 127.857 7.82730   8
  -6  -1   1 132.363 8.96398   3
  -6   1   1 133.844 8.92705   3
  -6   1   1 127.442 8.60559  10
  -6   1   1 135.955 8.57988   8
  -5  -1   1 180.671 9.94852   8
  -5  -1   1 172.660 10.5154   3
  -5  -1   1 176.342 10.6349  10
  -5  -1   1 173.564 11.0791   5
  -5   1   1 172.255 10.4525   3
  -5   1   1 196.824 10.5174   8
  -5   1   1 170.722 10.3817  10
   4  -1  -1 205.888 11.3435   8
  -4  -1   1 203.140 11.9540   5
  -4  -1   1 206.834 11.6602  10
  -4  -1   1 223.508 10.9452   8
  -4   1   1 197.733 12.3410   5
  -4   1   1 219.361 11.5108   8
  -4   1   1 191.292 11.2978  10
   4   1  -1 200.858 12.1261   5
  -3  -1   1 1094.93 49.3678   8
   3  -1  -1 994.872 49.7614   8
  -3  -1   1 982.624 49.9100  10
  -3  -1   1 1098.33 50.2495   5
  -3   1   1 937.046 50.4445   5
   3   1  -1 1002.58 49.2443   8
  -3   1   1 1095.01 49.8992   8
   3   1  -1 1017.41 50.2932   5
  -3   1   1 906.191 49.6144  10
   2   1  -1 4512.17 217.900   1
   0  -1  -1 2019.85 97.5111   1
  -1  -1  -1 3614.69 174.421   1
  -2  -1  -1 1040.27 49.6157   5
  -2  -1  -1 989.900 48.7746   8
  -2   1  -1 1012.97 49.3057   8
   2   1   1 1071.75 49.8208   5
  -2   1  -1 931.300 49.7673   5
  -3  -1  -1 44.2755 2.81685   8
  -3  -1  -1 34.6686 3.52244  10
  -3  -1  -1 41.2107 3.98225   5
  -3   1  -1 43.1863 4.33574   5
  -3   1  -1 37.1949 3.30088  10
   3   1   1 39.0522 4.19832   5
  -3   1  -1 45.8565 4.89999   8
  -4  -1  -1 28.1765 3.59122  10
  -4  -1  -1 33.4956 3.86571   5
  -4  -1  -1 29.1840 2.64160   8
  -4   1  -1 35.6685 3.45916   8
   4   1   1 22.2776 3.67819   5
  -4   1  -1 29.2331 3.37809  10
  -4   1  -1 33.3033 3.32737   3
  -5  -1  -1 1020.83 50.1251  10
  -5  -1  -1 973.800 49.8096   3
  -5  -1  -1 1014.60 49.0005   8
  -5   1  -1 1051.39 49.7134   8
   5   1   1 928.256 50.6949   5
  -5   1  -1 992.218 49.9064   3
  -5   1  -1 991.102 49.8801  10
  -6  -1  -1 300.923 16.7917   3
   6  -1   1 261.939 15.8952   4
  -6  -1  -1 302.499 15.6623   8
  -6  -1  -1 313.183 17.0866  10
  -6   1  -1 305.786 16.8191  10
  -6   1  -1 296.417 16.8000   3
  -6   1  -1 279.390 17.2990   8
  -7  -1  -1 120.755 7.67481   8
  -7  -1  -1 125.438 9.40056  10
   7  -1   1 111.155 8.30993   4
  -7  -1  -1 125.621 9.21262   3
  -7   1  -1 132.990 9.33127   3
  -7   1  -1 116.017 8.36510   8
  -7   1  -1 129.882 9.37590  10
  -8  -1  -1 178.985 12.3208   3
  -8   1  -1 173.680 12.4070   3
  -8   1  -1 168.177 13.2119   8
  -8   1  -1 182.553 12.0826  10
  -9  -1  -1 4.98283 4.08237   3
  -9   1  -1 1.30889 3.83400   3
 -10  -1  -1 12.8920 4.28912   3
  10  -1   1 9.47134 3.63075   6
  10   1   1 -0.0356 2.98050   4
 -10   1  -1 11.1957 4.43100   3
  11  -1   1 4.17619 2.92130   6
  11   1   1 9.27979 3.15212   6
 -11   1  -1 12.9452 4.46058   3
  12  -1   1 13.4969 2.98599   6
 -12  -1  -1 10.3094 2.27173   9
  12   1   1 13.4751 2.56906   6
  12  -2  -1 7.13807 2.47174   6
 -12  -2   1 3.04466 1.89897   9
  12   2  -1 3.35257 2.13483   6
 -11  -2   1 1.36096 2.14083   9
  11  -2  -1 2.57634 2.65490   6
  11   2  -1 0.24436 2.63050   4
 -11   2   1 1.91366 3.56258   3
  11   2  -1 -5.1752 2.15965   6
  10  -2  -1 24.2785 4.80291   6
  10   2  -1 27.9556 4.96014   4
 -10   2   1 27.8359 5.25268   3
   9  -2  -1 8.02051 3.44705   6
  -9   2   1 0.92592 3.68377   3
   8  -2  -1 9.00436 3.56695   6
  -8  -2   1 9.46295 3.98016   3
  -8   2   1 13.0065 4.27978   3
  -7  -2   1 40.8548 5.77947   3
   7  -2  -1 52.2190 5.11858   4
   7  -2  -1 46.0122 5.65683   6
  -7   2   1 47.2407 5.86567   3
  -7   2   1 43.7413 4.98515   8
   6  -2  -1 56.0936 5.08213   4
  -6  -2   1 59.1663 5.56939   3
  -6  -2   1 48.0210 3.62894   8
   6  -2  -1 51.0826 5.40338   6
  -6   2   1 54.5501 4.96704  10
  -6   2   1 60.1445 5.62884   3
  -6   2   1 53.8475 5.17856   8
  -5  -2   1 65.0824 3.94226   8
  -5  -2   1 60.4007 5.25557   3
   5   2  -1 61.9170 5.92117   5
  -5   2   1 61.4986 4.84795  10
  -5   2   1 59.6505 5.13645   3
  -5   2   1 64.0087 5.30953   8
  -4  -2   1 52.9756 3.15611   8
   4  -2  -1 50.4479 4.33001   6
  -4  -2   1 49.6805 4.49765   5
   4   2  -1 52.7203 5.06597   5
  -4   2   1 52.0572 3.91135  10
  -4   2   1 42.6319 4.89973   5
  -4   2   1 57.4571 4.65123   8
  -3  -2   1 501.463 25.0775   5
   3  -2  -1 470.596 24.9800   8
   3   2  -1 499.651 25.3897   5
  -3   2   1 499.582 25.0958   8
   2  -2  -1 2151.72 113.606   8
  -2  -2   1 2412.40 113.573   5
  -2   2   1 2359.62 113.740   8
   2   2  -1 2466.45 113.819   5
   1  -2  -1 950.430 48.8391   8
  -1  -2   1 1022.24 48.7028   5
   1   2  -1 1044.47 48.8166   5
  -1   2   1 991.968 48.9161   8
   0  -2  -1 735.366 38.6020   8
   0   2   1 847.248 38.9377   5
   0   2  -1 763.684 38.6931   8
   0   2   1 834.836 38.7158   8
  -1  -2  -1 1189.26 54.9408   5
  -1  -2  -1 1018.24 54.1897   8
  -1   2  -1 1098.26 54.8519   8
   1   2   1 1136.01 54.2360   8
   1   2   1 1191.25 55.0488   5
  -2  -2  -1 8178.65 393.490  10
  -3  -2  -1 63.8192 3.23859   8
  -3  -2  -1 60.2038 4.62572  10
  -3  -2  -1 62.0028 4.81475   5
  -3   2  -1 62.1226 4.63782   8
  -3   2  -1 55.0519 5.27788   5
  -3   2  -1 58.1276 4.28332  10
   3   2   1 66.9355 5.40667   5
  -4  -2  -1 1407.55 69.6616   5
  -4  -2  -1 1470.76 68.0786   8
  -4  -2  -1 1415.97 69.4786  10
  -4   2  -1 1519.59 69.4542   8
  -4   2  -1 1248.86 70.0885   5
  -4   2  -1 1364.33 69.1270  10
   4   2   1 1425.51 70.1572   5
  -5  -2  -1 102.488 7.38531  10
  -5  -2  -1 97.4623 7.02287   3
  -5  -2  -1 100.547 5.55698   8
   5   2   1 93.0039 7.86476   5
  -5   2  -1 94.6900 6.81218  10
  -5   2  -1 108.486 7.16470   8
  -5   2  -1 92.4271 6.97557   3
  -6  -2  -1 2.82526 1.03378   8
  -6  -2  -1 2.06176 2.49700   3
  -6   2  -1 -0.3573 2.03210   8
  -6   2  -1 1.62858 2.29992  10
   6   2   1 0.73780 2.30047   5
  -7  -2  -1 10.6666 3.73561   3
  -7   2  -1 12.3409 3.58819  10
  -7   2  -1 9.94166 4.08368   8
  -7   2  -1 7.82004 3.64233   3
  -8  -2  -1 4.91878 3.77634   3
   8  -2   1 8.53283 3.61193   6
  -8   2  -1 9.67074 3.41177  10
  -8   2  -1 6.27923 3.91855   3
  -9  -2  -1 3.08579 3.74884   3
   9  -2   1 2.56062 3.31052   6
  -9   2  -1 -1.3218 3.77663   3
  10  -2   1 11.1215 3.91792   6
 -10   2  -1 12.3407 4.48777   3
  10   2   1 8.97847 3.58997   4
  11  -2   1 8.93133 3.46976   6
 -11   2  -1 3.71489 3.39735   3
 -12  -2  -1 -0.1391 1.45663   9
  12  -2   1 -0.2182 1.94231   6
  12   2   1 -2.0383 1.81279   6
  12  -3  -1 0.46138 2.04117   6
 -12  -3   1 3.57658 2.08722   9
  11  -3  -1 2.13317 2.69082   6
 -11  -3   1 2.38338 2.18053   9
 -11   3   1 2.24600 3.23925   3
  11   3  -1 4.18400 2.87473   4
 -10  -3   1 7.59436 2.96211   9
  10  -3  -1 10.0171 3.82614   6
 -10   3   1 9.28124 3.90679   3
   9  -3  -1 125.537 9.79764   6
  -9   3   1 124.832 9.92362   3
   8  -3  -1 116.286 9.51920   6
  -8   3   1 124.956 9.42355   3
   7  -3  -1 321.231 18.2775   6
  -7   3   1 324.361 18.1487   3
  -7   3   1 299.055 18.0448   8
   6  -3  -1 221.706 13.7955   4
   6  -3  -1 256.148 14.1555   6
  -6   3   1 244.900 14.0183   8
   6   3  -1 218.115 14.3891   5
  -6   3   1 228.313 13.0685  10
  -6   3   1 230.924 15.2373   3
   5  -3  -1 33.3154 2.74439   2
   5  -3  -1 31.3612 4.12826   6
   5   3  -1 28.7966 4.21968   5
  -5   3   1 25.0276 3.55951   3
  -5   3   1 24.6830 3.03959  10
  -5   3   1 31.9127 4.06083   8
   4  -3  -1 392.849 20.5784   6
   4   3  -1 405.597 21.0177   5
  -4   3   1 364.466 20.0186   3
  -4   3   1 358.929 19.6582  10
  -4   3   1 411.664 20.6747   8
  -3  -3   1 12.2223 1.62262   9
   3  -3  -1 4.66210 2.02221   6
  -3  -3   1 10.0099 1.92699   5
  -3   3   1 12.6971 2.47026   8
   3   3  -1 9.39276 2.16243   5
  -2  -3   1 56.4591 3.80003   5
   2  -3  -1 44.7012 3.80061   8
   2   3  -1 54.7944 4.18402   5
  -2   3   1 56.2044 4.27594   8
   1  -3  -1 2111.23 111.777   8
   1   3  -1 2430.93 111.919   5
   1   3  -1 2355.84 111.384   8
  -1   3   1 2345.78 111.982   8
   0  -3  -1 9.97414 1.35546   8
   0   3  -1 12.6285 1.86564   5
   0   3   1 10.2817 1.73850   5
   0   3  -1 12.4893 1.59759   8
   0   3   1 12.3361 1.61993   8
  -1  -3  -1 29.8686 2.79871   5
   1   3   1 30.2059 3.02210   5
   1   3   1 27.1564 1.92177   8
  -1   3  -1 28.4169 2.83803   8
  -2  -3  -1 2153.73 101.956   5
   2   3   1 2113.12 102.212   5
  -2   3  -1 2021.88 101.930   8
  -3  -3  -1 1033.01 49.9283   5
  -3  -3  -1 962.935 49.9950   6
   3  -3   1 961.655 49.9453   6
  -3   3  -1 928.482 49.3390  10
  -3   3  -1 1059.66 50.0145   8
   3   3   1 1080.32 50.4726   5
   4  -3   1 428.523 22.6631   6
  -4  -3  -1 410.823 22.1275   3
  -4   3  -1 442.409 22.6027   8
  -4   3  -1 396.400 21.9571  10
   4   3   1 457.693 23.3652   5
   5  -3   1 81.7282 5.54752   2
   5  -3   1 94.0893 7.20533   6
  -5  -3  -1 88.1140 6.62911   3
  -5   3  -1 96.4700 6.81713   3
  -5   3  -1 99.9195 7.15293   8
  -5   3  -1 94.2500 6.47156  10
   5   3   1 92.4823 7.69144   5
   6  -3   1 131.572 9.48858   6
  -6   3  -1 143.842 9.41472   8
  -6   3  -1 133.076 9.30473   3
  -6   3  -1 129.374 8.73894  10
   6   3   1 122.853 10.0219   5
  -7  -3  -1 177.878 11.9010   3
   7  -3   1 177.274 12.0880   6
  -7   3  -1 189.243 12.2510   3
   8  -3   1 3.79334 4.66660   6
  -8   3  -1 4.88523 2.77793  10
   9  -3   1 27.5819 5.03421   6
  -9   3  -1 34.3347 5.64291   3
 -10  -3  -1 5.12411 2.79650   9
  10  -3   1 5.12988 3.55296   6
 -10   3  -1 1.95818 3.50105   3
  11  -3   1 2.76337 3.04557   6
 -11  -3  -1 5.03006 2.14718   9
 -11   3  -1 3.80683 3.12825   3
  11   3   1 1.25370 2.53089   4
 -11  -4   1 3.49916 2.15581   9
  11  -4  -1 0.93719 2.56123   6
  11   4  -1 -0.4089 2.64949   4
 -10  -4   1 10.6148 3.05817   9
  10  -4  -1 11.6299 4.73136   6
   9  -4  -1 27.5882 5.01861   6
  -9  -4   1 32.4423 4.10275   9
  -9   4   1 21.8433 4.44011   3
   8  -4  -1 198.166 13.5903   6
  -8  -4   1 222.178 12.2823   9
  -8   4   1 206.357 13.3051   3
   7  -4  -1 15.7083 4.06833   6
  -7  -4   1 18.3978 3.13431   9
  -7   4   1 18.6508 3.70734   3
  -6  -4   1 3.06634 2.08531   9
   6  -4  -1 -0.1112 1.64298   2
   6  -4  -1 -0.3335 3.07618   6
  -6   4   1 2.53854 2.23144   8
  -6   4   1 -0.3029 1.55984  10
  -6   4   1 0.96854 2.27253   3
   6   4  -1 5.34916 2.62089   5
   5  -4  -1 187.728 13.4124   6
   5  -4  -1 178.774 9.92055   2
  -5   4   1 169.523 9.67545  10
  -5   4   1 172.601 10.4419   3
   5   4  -1 166.052 11.2935   5
  -5   4   1 174.573 11.0326   8
   4  -4  -1 91.3211 6.78928   6
  -4  -4   1 86.4565 5.41201   9
   4  -4  -1 91.9001 5.84914   2
  -4   4   1 79.7919 5.77178   3
  -4   4   1 84.0416 6.64940  10
   4   4  -1 91.1501 6.91454   5
  -4   4   1 95.4431 6.73746   8
  -3  -4   1 89.5319 5.58372   5
   3  -4  -1 79.3311 4.82599   9
  -3  -4   1 83.1381 5.06879   9
   3  -4  -1 77.8439 5.44703   2
  -3  -4   1 74.9329 5.56786   6
   3  -4  -1 75.2363 6.15470   6
  -3   4   1 91.8396 6.28336   8
   3   4  -1 88.3980 6.34718   5
   2  -4  -1 49.5278 4.18620   2
   2  -4  -1 58.8961 4.97939   6
  -2  -4   1 54.8645 3.68279   9
   2   4  -1 64.7814 4.78348   5
  -2   4   1 58.8941 4.71733   8
   1  -4  -1 634.200 32.0558   2
   1  -4  -1 579.989 32.4401   6
  -1   4   1 684.405 32.3469   5
   1   4  -1 673.528 32.1739   5
   1   4  -1 647.783 31.4971   8
  -1   4   1 625.353 32.1090   8
   0  -4   1 178.168 11.4888   2
   0   4   1 207.963 11.0506   5
   0   4  -1 209.144 10.8283   5
   0   4   1 198.204 10.5518   8
   0   4  -1 189.375 10.5530   8
   1  -4   1 236.105 13.1855   2
   1  -4   1 227.969 13.6423   6
  -1  -4  -1 232.101 13.6278   6
  -1   4  -1 261.237 13.4793   8
   1   4   1 275.050 13.7820   5
   1   4   1 261.634 12.6076   8
  -2  -4  -1 2850.86 142.791   6
  -2  -4  -1 2915.70 141.846   9
   2  -4   1 2926.06 141.840   9
   2  -4   1 2929.53 142.350   2
   2  -4   1 2941.88 143.460   6
   2   4   1 3136.99 143.117   5
  -2   4  -1 2755.63 142.070  10
  -2   4  -1 3074.10 142.863   8
  -3  -4  -1 157.289 8.81027   9
  -3  -4  -1 167.478 9.80475   5
   3  -4   1 166.149 8.75967   9
   3  -4   1 165.467 9.27233   2
  -3  -4  -1 154.990 9.63645   6
   3  -4   1 164.972 10.0862   6
   3   4   1 171.264 10.3906   5
  -3   4  -1 150.291 9.02483  10
  -3   4  -1 180.018 10.0875   8
  -4  -4  -1 387.099 19.2090   9
   4  -4   1 389.518 20.6170   6
   4  -4   1 376.592 19.5001   2
  -4   4  -1 385.124 20.5387   8
   4   4   1 381.674 21.0236   5
  -4   4  -1 344.868 19.4930  10
   5  -4   1 319.653 17.8110   6
  -5  -4  -1 326.544 16.3142   9
   5  -4   1 324.109 16.4884   2
  -5   4  -1 320.643 17.2758   3
  -5   4  -1 287.674 16.6285  10
  -5   4  -1 300.949 17.6325   8
   5   4   1 300.950 18.2989   5
   6  -4   1 3.77072 1.72751   2
   6  -4   1 1.39775 3.03021   6
  -6  -4  -1 1.92917 1.98444   9
  -6   4  -1 -0.3029 1.89168  10
   6   4   1 -1.1494 2.49050   5
  -6   4  -1 2.57515 2.71455   8
  -6   4  -1 5.24611 2.98657   3
  -7  -4  -1 188.463 10.9642   9
   7  -4   1 204.394 13.0255   6
  -7   4  -1 183.792 12.2251   3
  -7   4  -1 177.237 11.2877  10
   8  -4   1 21.0989 4.94396   6
  -8  -4  -1 23.7256 3.56748   9
  -8   4  -1 26.4366 4.78497   3
   9  -4   1 2.72477 3.48820   6
  -9  -4  -1 2.48619 2.48138   9
  -9   4  -1 -0.1991 3.57708   3
 -10  -4  -1 -0.7898 2.35649   9
  10  -4   1 3.91899 3.44801   6
 -10   4  -1 -0.1639 2.98198   3
 -11  -4  -1 13.3239 2.42006   9
  11  -4   1 13.1105 3.25603   6
  11   4   1 24.9109 4.70146   4
 -11   4  -1 16.3629 3.65602   3
  11  -5  -1 2.82572 2.36541   6
 -11  -5   1 6.01643 1.77600   9
  10  -5  -1 13.5962 3.74035   6
 -10  -5   1 13.4641 2.73811   9
 -10   5   1 17.2599 3.33599   3
  -9  -5   1 18.1103 3.20250   9
   9  -5  -1 19.0456 4.39922   6
  -9   5   1 22.4016 4.07769   3
  -8  -5   1 48.0896 5.12239   9
   8  -5  -1 44.1558 6.10965   6
  -8   5   1 43.6474 5.63149   3
  -7   5   1 10.2500 3.28925   3
  -6  -5   1 43.9526 4.14955   9
   6  -5  -1 39.8336 4.17005   2
   6  -5  -1 39.6343 5.40911   6
   6   5  -1 27.1665 4.64984   5
  -6   5   1 31.4373 4.37730   3
   5  -5  -1 161.545 10.9385   6
  -5  -5   1 170.065 9.34037   9
   5  -5  -1 160.758 9.72074   2
   5   5  -1 160.192 11.0133   5
  -5   5   1 155.922 9.78903   3
   4  -5  -1 481.488 24.0503   2
   4  -5  -1 483.729 25.0961   6
  -4  -5   1 497.288 23.6961   9
  -4  -5   1 430.721 23.3470   2
  -4   5   1 430.830 23.7423   3
  -4   5   1 462.483 24.8104   8
  -3  -5   1 491.518 26.6306   6
   3  -5  -1 517.828 27.3977   6
   3  -5  -1 529.279 26.5436   2
  -3  -5   1 518.390 25.8438   9
  -3  -5   1 506.922 26.0680   2
   3  -5  -1 524.877 25.6800   9
  -3   5   1 524.935 27.1117   8
   3   5  -1 520.187 27.1487   5
   2  -5  -1 1233.66 62.5118   6
  -2  -5   1 1191.71 62.0422   6
  -2  -5   1 1216.31 61.1216   9
   2  -5  -1 1244.91 61.0103   9
   2  -5  -1 1259.50 61.8212   2
  -2  -5   1 1280.83 61.6193   2
   2   5  -1 1279.60 62.2011   5
  -2   5   1 1306.37 62.2322   5
  -2   5   1 1281.94 62.1745   8
  -1  -5   1 872.022 42.8562   2
   1  -5  -1 849.572 42.9381   2
   1  -5  -1 830.545 43.5454   6
  -1  -5   1 816.402 43.2513   6
  -1  -5   1 833.319 42.2511   9
  -1   5   1 908.955 43.1070   8
  -1   5   1 899.488 43.2846   5
   1   5  -1 879.015 43.1264   5
   1   5  -1 876.045 42.2922   8
   0  -5   1 363.646 18.6750   9
   0  -5   1 383.112 19.3938   2
   0  -5  -1 350.597 19.8523   6
   0  -5  -1 373.540 19.3846   2
   0  -5   1 355.265 19.8366   6
   0   5   1 377.456 19.7087   5
   0   5   1 380.730 19.1160   8
   0   5  -1 376.348 19.1853   8
   0   5  -1 383.317 19.4949   5
   1  -5   1 384.542 20.1183   2
   1  -5   1 385.576 20.7794   6
  -1  -5  -1 368.918 20.5850   6
   1  -5   1 377.701 19.4644   9
  -1  -5  -1 370.380 19.4187   9
  -1  -5  -1 398.715 20.1511   2
   1   5   1 373.763 19.2957   8
   1   5   1 406.000 20.6871   5
  -1   5  -1 409.046 20.3523   5
  -1   5  -1 406.820 20.3696   8
   2  -5   1 313.843 15.7460   9
  -2  -5  -1 303.234 16.2331   2
  -2  -5  -1 317.368 15.7587   9
   2  -5   1 316.799 17.2485   6
   2  -5   1 293.852 16.3569   2
  -2  -5  -1 301.046 16.8466   6
  -2   5  -1 318.506 16.8839   8
  -2   5  -1 288.808 15.7635  10
   2   5   1 326.487 17.2185   5
   3  -5   1 286.661 16.3443   6
  -3  -5  -1 291.758 14.7200   9
  -3  -5  -1 288.143 14.9857   2
   3  -5   1 297.318 14.6788   9
  -3  -5  -1 282.709 15.7719   6
   3  -5   1 294.886 15.3940   2
  -3   5  -1 248.221 14.6236  10
  -3   5  -1 286.971 15.9946   8
   4  -5   1 183.215 11.4657   6
   4  -5   1 177.012 10.2203   2
  -4  -5  -1 184.640 9.89907   9
  -4   5  -1 161.641 10.1990   3
  -4   5  -1 153.832 9.54112  10
   4   5   1 173.931 11.3816   5
  -4   5  -1 188.548 11.2876   8
  -5  -5  -1 264.168 13.2299   9
   5  -5   1 260.563 15.1280   6
   5  -5   1 249.900 13.6197   2
  -5   5  -1 249.190 14.0804   3
   5   5   1 210.964 14.8957   5
  -5   5  -1 252.719 14.9211   8
  -5   5  -1 226.361 13.1948  10
  -6  -5  -1 400.329 19.7534   9
   6  -5   1 382.067 19.8647   2
   6  -5   1 376.638 21.5378   6
  -6   5  -1 347.983 19.7073  10
  -6   5  -1 378.163 20.7552   3
  -7  -5  -1 28.9492 3.57059   9
   7  -5   1 34.1949 5.68815   6
  -7   5  -1 19.0577 5.57120   3
  -8  -5  -1 1.70104 2.52984   9
   8  -5   1 0.19270 3.56577   6
  -8   5  -1 3.13876 3.06365   3
  -9  -5  -1 1.66982 2.42161   9
   9  -5   1 4.31779 3.76001   6
  -9   5  -1 4.80845 3.27357   3
  10  -5   1 20.0895 4.13612   6
 -10  -5  -1 28.7455 3.43412   9
 -10   5  -1 30.1083 4.13761   3
 -11  -5  -1 5.42463 2.17025   9
  11  -5   1 7.49329 2.98519   6
  11   5   1 9.57096 2.62000   4
 -10  -6   1 6.92843 2.16870   9
  10  -6  -1 5.60796 3.23199   6
   9  -6  -1 3.02912 3.59563   6
  -9  -6   1 1.36773 2.63031   9
  -9   6   1 1.14488 2.36785   3
  -8  -6   1 0.26094 2.45359   9
   8  -6  -1 6.52118 3.65104   6
  -8   6   1 4.32025 2.58857   3
  -7  -6   1 8.75067 2.81887   9
   7  -6  -1 2.17623 3.41575   6
  -7   6   1 5.54273 2.53840   3
  -6   6   1 7.92543 2.56156   3
   5  -6  -1 17.6829 3.12604   2
  -5  -6   1 16.1531 2.77860   9
   5  -6  -1 13.4423 3.82315   6
  -5   6   1 16.8689 2.85993   3
  -4  -6   1 1.95210 1.90372   6
  -4  -6   1 3.82392 1.64714   2
   4  -6  -1 -1.4047 1.89316   2
   4  -6  -1 2.32430 2.79525   6
  -4  -6   1 2.72645 1.91484   9
  -4   6   1 1.05325 2.03802   8
   4   6  -1 1.92648 2.20572   5
  -4   6   1 -0.6819 2.16187   3
   3  -6  -1 9.91523 2.72619   2
  -3  -6   1 15.2159 2.39279   2
   3  -6  -1 15.3716 3.63583   6
  -3  -6   1 9.40707 2.01044   9
  -3  -6   1 10.8163 2.93647   6
   3   6  -1 7.89132 2.29128   5
  -3   6   1 6.19415 2.43303   8
  -3   6   1 10.6849 2.55791   5
  -2  -6   1 192.256 11.1972   6
   2  -6  -1 191.744 11.8249   6
  -2  -6   1 187.239 10.6699   2
   2  -6  -1 187.802 9.89191   9
   2  -6  -1 197.481 11.0512   2
   2   6  -1 159.104 13.9031   5
  -2   6   1 178.045 11.1078   5
  -2   6   1 175.962 11.0419   8
  -1  -6   1 854.754 43.9015   6
  -1  -6   1 881.452 42.6521   9
   1  -6  -1 879.899 42.5513   9
   1  -6  -1 872.960 44.6061   6
  -1  -6   1 929.979 43.4758   2
   1   6  -1 872.660 42.5844   8
   1   6  -1 809.116 43.5686   5
  -1   6   1 829.802 43.4121   8
  -1   6   1 879.127 43.8493   5
   0  -6  -1 -2.1260 1.70476   2
   0  -6  -1 0.98689 2.14707   6
   0  -6   1 -0.1616 1.25370   9
   0  -6  -1 0.57859 1.09318   9
   0  -6   1 0.64304 1.81618   2
   0  -6   1 0.99453 2.00768   6
   0   6  -1 1.14627 1.49077   5
   0   6   1 0.49661 1.10582   8
   0   6  -1 1.59524 1.21029   8
   0   6   1 -0.1325 1.63420   5
  -1  -6  -1 26.5600 3.40823   2
   1  -6   1 18.6738 5.23405   2
   1  -6   1 14.7884 3.27249   6
   1  -6   1 22.6426 2.44118   9
  -1  -6  -1 21.3950 3.76919   6
  -1  -6  -1 20.6448 2.28132   9
   1   6   1 20.3034 1.82368   8
   1   6   1 21.7016 3.36163   5
  -1   6  -1 24.1430 3.21663   8
  -1   6  -1 15.8809 2.71838   5
  -2  -6  -1 15.3091 2.12884   9
  -2  -6  -1 12.6752 2.46545   2
   2  -6   1 10.5631 2.59000   2
  -2  -6  -1 13.3086 4.10053   6
   2  -6   1 16.5934 3.47570   6
  -2   6  -1 10.9922 2.31336   5
  -2   6  -1 14.5512 2.70283   8
   2   6   1 7.43796 2.41405   5
   3  -6   1 4.64515 1.67291   9
   3  -6   1 1.83726 2.67695   6
  -3  -6  -1 1.71583 2.11002   6
  -3  -6  -1 1.00485 1.67017   9
  -3  -6  -1 3.44785 1.82348   2
   3  -6   1 0.20393 2.03693   2
  -3   6  -1 -1.8629 1.62528   8
   3   6   1 -1.1908 1.75478   5
   4  -6   1 73.0625 7.00214   6
  -4  -6  -1 71.8436 5.12267   9
   4  -6   1 71.8725 5.84131   2
   4   6   1 69.9452 6.68818   5
  -4   6  -1 65.8156 5.45240   3
  -4   6  -1 72.5391 6.51842   8
  -5  -6  -1 5.72539 2.29512   9
   5  -6   1 6.17986 2.45596   2
   5  -6   1 7.85845 3.69131   6
  -5   6  -1 11.0792 2.92473   3
   6  -6   1 16.3628 4.55474   6
   6  -6   1 14.1169 2.99647   2
  -6  -6  -1 15.1817 3.10641   9
  -6   6  -1 14.3183 3.44535   3
   7  -6   1 1.99794 3.76468   6
  -7  -6  -1 3.76199 2.48671   9
  -7   6  -1 4.33157 2.74334   3
   8  -6   1 1.23265 3.43883   6
  -8  -6  -1 -0.3287 2.33051   9
  -8   6  -1 6.93587 3.07382   3
   9  -6   1 -3.3272 2.78428   6
  -9  -6  -1 0.16483 2.26148   9
  -9   6  -1 -0.5420 2.27305   3
 -10  -6  -1 0.27211 1.85831   9
  10  -6   1 4.78571 3.05350   6
 -10   6  -1 2.83254 2.37625   3
  10  -7  -1 13.0881 3.66293   6
 -10  -7   1 9.84460 2.43898   9
   9  -7  -1 -1.1098 2.73661   6
  -9  -7   1 0.49187 2.16189   9
   8  -7  -1 0.10082 4.17554   6
  -7  -7   1 118.561 7.81314   9
   7  -7  -1 119.612 9.75910   6
  -6  -7   1 107.440 7.39047   9
   6  -7  -1 111.553 9.76482   6
  -5  -7   1 107.225 7.11980   9
   5  -7  -1 110.641 10.9273   2
   5  -7  -1 108.030 9.27608   6
  -4  -7   1 111.672 8.03855   6
   4  -7  -1 123.791 8.40500   2
  -4  -7   1 119.183 7.25145   9
   4  -7  -1 112.532 9.54320   6
   4   7  -1 98.4623 8.87335   5
   3  -7  -1 40.4170 4.87206   2
  -3  -7   1 37.5233 4.04258   2
   3  -7  -1 38.4628 3.38550   9
  -3  -7   1 31.8868 3.42261   9
  -3  -7   1 30.4032 4.36445   6
   3  -7  -1 36.6195 5.57132   6
  -3   7   1 37.0601 4.79342   8
   3   7  -1 23.9508 3.87453   5
   2  -7  -1 15.4493 3.85442   6
   2  -7  -1 14.2461 2.14946   9
  -2  -7   1 11.9155 3.11564   6
   2  -7  -1 17.3227 3.40465   2
  -2  -7   1 15.1601 2.87268   2
  -2  -7   1 13.5122 2.32900   9
  -2   7   1 18.0238 3.02132   8
  -2   7   1 18.5577 3.28459   5
   2   7  -1 8.42933 2.37419   5
  -1  -7   1 8.32885 1.95868   9
   1  -7  -1 11.8299 1.98872   9
  -1  -7   1 9.86375 3.05918   6
  -1  -7   1 8.65487 2.74712   2
   1  -7  -1 4.51529 2.58242   2
   1  -7  -1 4.49123 2.95389   6
  -1   7   1 10.5899 2.13892   8
  -1   7   1 10.3467 2.57096   5
   1   7  -1 8.60128 2.29130   5
   0  -7  -1 944.018 47.0685   6
   0  -7   1 979.931 45.2864   9
   0  -7  -1 981.087 46.3637   2
   0  -7  -1 946.958 45.1570   9
   0  -7   1 918.491 46.8597   6
   0  -7   1 928.335 46.1986   2
   0   7   1 864.448 45.4471   8
   0   7  -1 874.935 45.6523   8
   0   7  -1 837.977 46.2465   5
   1  -7   1 66.1948 5.80098   2
   1  -7   1 67.7009 4.62921   9
   1  -7   1 67.4134 6.40902   6
  -1  -7  -1 65.5951 5.76507   2
  -1  -7  -1 69.1715 6.20418   6
  -1  -7  -1 61.1392 4.48036   9
  -1   7  -1 57.1700 5.42537   5
  -1   7  -1 59.1157 5.09138   8
   1   7   1 64.0818 5.78500   5
  -2  -7  -1 14.7957 3.53101   6
  -2  -7  -1 21.3608 2.59866   9
  -2  -7  -1 25.2219 3.55883   2
   2  -7   1 20.2083 2.69761   9
   2  -7   1 20.5458 3.68036   2
   2  -7   1 16.2212 3.99583   6
   2   7   1 18.8045 4.32704   5
  -2   7  -1 28.7429 3.79112   8
   3  -7   1 9.08403 2.98983   2
  -3  -7  -1 8.81137 3.08614   6
   3  -7   1 11.5441 2.29491   9
  -3  -7  -1 9.09498 2.12056   9
   3  -7   1 8.11751 3.52138   6
   3   7   1 8.75270 2.74415   5
  -3   7  -1 15.8013 4.11940   8
  -4  -7  -1 46.8627 4.12059   9
   4  -7   1 43.3725 6.20592   6
   4  -7   1 41.6734 4.97095   2
   5  -7   1 13.2111 4.17959   6
  -5  -7  -1 14.0657 2.83745   9
   5  -7   1 11.2669 3.05719   2
  -5   7  -1 12.6792 2.90113   3
   6  -7   1 40.9812 6.03308   6
  -6  -7  -1 41.9499 4.36546   9
   6  -7   1 38.8314 4.36465   2
  -6   7  -1 34.1883 4.40440   3
  -7  -7  -1 11.2501 2.50167   9
   7  -7   1 10.3682 4.16989   6
  -7   7  -1 6.62126 2.61290   3
  -8  -7  -1 12.9083 2.69177   9
   8  -7   1 17.8672 4.74142   6
  -8   7  -1 15.2461 2.76919   3
  -9  -7  -1 15.2126 2.65654   9
   9  -7   1 16.9239 3.77298   6
   9  -8  -1 1.10732 2.37670   6
  -8  -8   1 2.37821 1.96013   9
   8  -8  -1 -0.9322 2.80971   6
   7  -8  -1 2.06536 4.41276   6
  -7  -8   1 1.48480 2.43166   9
  -6  -8   1 6.51974 2.61706   9
   6  -8  -1 10.8387 3.94914   6
   5  -8  -1 2.84766 3.78842   6
  -5  -8   1 6.80146 2.62831   9
  -4  -8   1 14.0379 2.72476   9
   4  -8  -1 10.2997 3.21548   2
   4  -8  -1 8.23717 4.04767   6
  -3  -8   1 15.9356 3.17610   2
   3  -8  -1 18.0601 4.64973   6
   3  -8  -1 19.7900 3.79290   2
  -3  -8   1 18.5000 2.82320   9
  -2  -8   1 12.5934 3.53883   6
   2  -8  -1 10.4057 2.02898   9
  -2  -8   1 7.19556 2.16717   9
  -2  -8   1 10.7394 3.02577   2
  -1  -8   1 3.25964 2.65162   2
   1  -8  -1 -0.2933 1.65713   9
  -1  -8   1 1.60543 2.82785   6
   1  -8  -1 2.27134 2.65491   2
   1  -8  -1 2.33655 3.07558   6
  -1  -8   1 2.05804 1.93479   9
   0  -8   1 3.25372 2.91752   6
   0  -8   1 1.78657 2.56138   2
   0  -8  -1 2.43274 3.02184   6
   0  -8   1 -0.2398 1.62419   9
   0  -8  -1 0.66862 1.56014   9
   0  -8  -1 4.28926 2.84994   2
  -1  -8  -1 45.6428 6.03127   6
   1  -8   1 50.1025 4.36995   9
   1  -8   1 47.9346 5.75433   2
  -1  -8  -1 52.7132 5.59072   2
  -1  -8  -1 52.7420 4.26296   9
   1  -8   1 56.3635 6.51444   6
   2  -8   1 1.39124 1.76216   9
  -2  -8  -1 1.26610 1.77192   9
  -2  -8  -1 0.19355 2.69958   6
   2  -8   1 0.46622 3.20328   2
  -3  -8  -1 11.0694 2.33277   9
  -3  -8  -1 10.1555 3.15998   6
   3  -8   1 7.64171 3.94395   6
   3  -8   1 11.8811 3.56434   2
   4  -8   1 25.2519 4.08306   2
  -4  -8  -1 24.0560 3.05089   9
   4  -8   1 29.2702 5.39842   6
  -5  -8  -1 6.21984 2.28863   9
   5  -8   1 12.1461 3.22762   2
   5  -8   1 8.63685 4.01073   6
  -6  -8  -1 -0.4908 1.89215   9
   6  -8   1 0.34605 3.38789   6
   7  -8   1 1.04704 3.18912   6
  -7  -8  -1 -2.3648 1.88698   9
   8  -8   1 2.99449 2.89249   6
  -8  -8  -1 0.25449 1.75675   9
   9  -8   1 31.0741 4.47591   6
  -9  -8  -1 28.2463 2.83889   9
  -8  -9   1 14.1580 1.93437   9
   8  -9  -1 16.5442 4.70568   6
  -7  -9   1 50.0319 4.23932   9
   7  -9  -1 56.0750 5.91604   6
  -6  -9   1 8.55956 2.46526   9
   6  -9  -1 9.24387 3.68583   6
   5  -9  -1 1.52344 3.39247   6
  -5  -9   1 -0.7690 2.16169   9
  -4  -9   1 58.7946 4.90064   9
   4  -9  -1 62.0120 7.51846   6
  -3  -9   1 203.449 11.1536   9
   3  -9  -1 198.754 13.5806   6
  -3  -9   1 192.921 12.1649   6
   2  -9  -1 87.5205 7.07124   2
  -2  -9   1 78.0970 7.18238   6
  -2  -9   1 83.7483 6.82330   2
   2  -9  -1 93.8341 8.20156   6
  -2  -9   1 83.8456 5.84602   9
   2  -9  -1 79.2364 5.51595   9
   1  -9  -1 42.1166 5.79849   6
  -1  -9   1 47.3362 5.77369   6
  -1  -9   1 35.6994 4.75990   2
   1  -9  -1 44.5666 5.36776   2
  -1  -9   1 40.3276 4.15335   9
   1  -9  -1 47.8429 4.01060   9
   0  -9  -1 33.9947 3.58218   9
   0  -9   1 42.8500 3.89788   9
   0  -9   1 32.3730 4.52973   2
   0  -9   1 35.4381 5.06584   6
   0  -9  -1 34.6851 5.30163   6
   1  -9   1 10.5617 2.35493   9
   1  -9   1 11.6150 3.91672   6
  -1  -9  -1 9.61860 3.46716   6
  -1  -9  -1 12.0975 2.17599   9
   1  -9   1 5.28792 2.93253   2
   2  -9   1 94.8200 8.58314   6
   2  -9   1 91.5798 6.07944   9
  -2  -9  -1 88.4918 7.95706   6
   2  -9   1 89.8098 7.66065   2
  -2  -9  -1 91.9964 6.05440   9
   3  -9   1 123.107 8.90668   2
  -3  -9  -1 122.976 7.55310   9
  -3  -9  -1 119.294 8.90148   6
   3  -9   1 134.474 10.4364   6
  -4  -9  -1 223.294 12.1607   9
   4  -9   1 216.956 13.2658   2
   4  -9   1 232.475 14.7417   6
  -5  -9  -1 54.5813 5.86558   9
   5  -9   1 64.1818 7.53421   6
   6  -9   1 14.0378 3.91299   6
  -6  -9  -1 14.4337 2.28921   9
   7  -9   1 28.4245 4.45917   6
  -7  -9  -1 25.8330 2.73492   9
   8  -9   1 21.4341 3.33177   6
  -8  -9  -1 17.9874 1.98484   9
   6 -10  -1 0.67196 2.71491   6
  -6 -10   1 5.07034 2.05553   9
  -5 -10   1 0.36103 1.51693   9
   5 -10  -1 -1.7030 2.97523   6
  -4 -10   1 6.95169 2.00655   9
   4 -10  -1 9.01727 3.65556   6
  -3 -10   1 20.0519 2.70962   9
   3 -10  -1 14.1822 4.51310   6
  -2 -10   1 90.4031 8.86261   6
  -2 -10   1 81.6300 6.02401   9
   2 -10  -1 83.7154 7.94169   6
  -1 -10   1 13.9904 3.68914   6
  -1 -10   1 18.1190 2.56316   9
   1 -10  -1 23.5530 4.31466   6
   1 -10  -1 19.4953 2.27780   9
   0 -10  -1 33.5060 3.08486   9
   0 -10  -1 31.2673 4.93432   6
   0 -10   1 21.9506 3.99380   6
   0 -10   1 24.2944 2.84268   9
   1 -10   1 90.5310 5.98901   9
   1 -10   1 90.7240 7.95361   6
  -1 -10  -1 96.0797 5.88032   9
   1 -10   1 97.1562 7.59312   2
  -1 -10  -1 98.1034 7.90596   6
  -2 -10  -1 18.8846 4.48353   6
   2 -10   1 12.5473 3.15011   2
   2 -10   1 14.1429 4.25983   6
  -2 -10  -1 9.29342 2.70549   9
   3 -10   1 19.4990 4.34316   6
  -3 -10  -1 20.2288 2.48105   9
  -4 -10  -1 2.26853 1.56789   9
   4 -10   1 -0.2192 3.06359   6
  -5 -10  -1 3.24561 1.49658   9
   5 -10   1 -1.7617 2.59972   6
   6 -10   1 1.15959 2.54973   6
  -6 -10  -1 4.26316 1.31984   9
   4 -11  -1 20.7766 3.41609   6
  -4 -11   1 30.0852 2.52848   9
   3 -11  -1 2.61894 2.52987   6
  -3 -11   1 4.45353 1.67914   9
   2 -11  -1 4.38288 2.61994   6
  -2 -11   1 3.27123 1.52985   9
  -1 -11   1 36.1685 4.36268   6
  -1 -11   1 40.6401 3.27740   9
   1 -11  -1 36.9720 4.94065   6
   0 -11   1 39.0411 3.11317   9
   0 -11   1 38.1404 4.59448   6
   0 -11  -1 39.3420 4.89081   6
   1 -11   1 54.9631 5.27181   6
  -1 -11  -1 54.9167 5.14461   6
  -1 -11  -1 40.8604 3.42226   9
  -2 -11  -1 13.5088 2.42848   9
   2 -11   1 15.8020 3.03966   6
  -3 -11  -1 36.0206 2.72207   9
   3 -11   1 32.1755 4.29081   6
   4 -11   1 35.7422 5.26762   6
  -4 -11  -1 43.6294 2.88940   9
  12   0  -2 7.97321 3.45087   6
  11   0  -2 -0.2685 2.53927   6
  10   0  -2 78.3889 7.10771   4
 -10   0   2 97.5837 9.19422   3
  10   0  -2 85.7132 7.42702   6
   9   0  -2 19.9488 4.24169   4
  -9   0   2 22.7326 5.13360   3
  -8   0   2 11.0265 2.58742   8
  -8   0   2 4.27269 3.71677   3
   8   0  -2 4.21112 3.08896   4
  -7   0   2 196.200 11.9086   8
  -7   0   2 211.904 12.8971   3
  -6   0   2 78.5736 5.79511   8
  -6   0   2 80.3339 6.52579   3
  -5   0   2 548.975 28.8430   3
  -5   0   2 593.035 28.5872   8
  -5   0   2 538.322 29.5769   5
   5   0  -2 567.325 28.4128   8
   4   0  -2 11.1259 1.82985   8
  -4   0   2 13.1156 2.60934   5
  -4   0   2 14.6956 2.38309  10
  -3   0   2 1004.36 54.3528  10
  -3   0   2 1067.95 54.8806   5
  -3   0   2 1202.51 54.3806   8
   3   0  -2 1172.30 54.3339   8
   2   0  -2 161.973 8.31853   8
  -2   0   2 146.042 8.60427   5
  -2   0   2 161.505 8.34311   8
   1   0  -2 3730.08 179.967   1
   0   0   2 0.19276 0.23086   5
   1   0   2 78.4656 4.82563   5
  -1   0  -2 80.3036 4.73429   5
  -2   0  -2 1048.50 53.5927  10
  -2   0  -2 1128.55 53.8987   5
   2   0   2 1109.25 54.0282   5
  -3   0  -2 374.146 19.7593   5
  -3   0  -2 354.020 19.2784  10
   3   0   2 358.063 19.9027   5
  -3   0  -2 400.810 18.9457   8
  -4   0  -2 779.490 39.7596  10
   4   0   2 754.356 40.4405   5
  -4   0  -2 862.361 39.2769   8
  -4   0  -2 793.302 40.3717   5
  -4   0  -2 757.406 39.5364   3
  -5   0  -2 794.645 41.0062   3
  -5   0  -2 802.144 41.1900  10
  -5   0  -2 833.968 40.5023   8
  -6   0  -2 2834.37 138.007   8
  -6   0  -2 2876.46 138.958  10
  -6   0  -2 2803.24 138.726   3
  -7   0  -2 197.199 12.1442   8
  -7   0  -2 218.767 13.4448   3
  -7   0  -2 209.906 13.4888  10
  -8   0  -2 2.60788 3.82568   8
  -8   0  -2 9.49817 3.83481  10
  -8   0  -2 9.62684 4.19392   3
   8   0   2 16.8461 3.47798   4
  -9   0  -2 24.2355 5.41368   3
 -10   0  -2 16.4121 5.03200   3
  11   0   2 3.23993 3.10239   6
 -11   0  -2 4.75146 3.41722   3
  12   0   2 18.3110 2.88757   6
  12  -1  -2 -3.8802 2.06619   6
 -12  -1   2 1.16822 1.80169   9
  12   1  -2 5.42913 2.17919   6
  11  -1  -2 1.51185 2.79737   6
  11   1  -2 0.46359 2.52207   6
  11   1  -2 -6.6412 2.58123   4
  10  -1  -2 -0.2578 4.61160   4
  10  -1  -2 8.22333 3.40104   6
  10   1  -2 8.40378 3.63575   4
 -10   1   2 6.70487 4.13535   3
  -9  -1   2 -1.0111 3.94275   3
   9  -1  -2 -3.2540 2.84878   4
   9  -1  -2 0.81272 4.15430   6
   9   1  -2 -4.4039 2.86010   4
  -9   1   2 4.85554 3.98290   3
   8  -1  -2 -2.2510 2.71481   4
  -8  -1   2 0.13166 2.37114   8
  -8  -1   2 3.20836 3.59090   3
  -8   1   2 10.0721 2.55252   8
  -8   1   2 2.65943 3.21701   3
  -7  -1   2 6.34742 1.98078   8
   7  -1  -2 4.49200 2.84183   4
  -7  -1   2 3.18606 3.34869   3
  -7   1   2 2.11547 2.28206   8
  -7   1   2 6.01111 2.95677   3
  -6  -1   2 128.137 7.63530   8
   6  -1  -2 120.803 8.38476   4
  -6  -1   2 131.303 8.63620   3
  -6   1   2 128.684 8.60538   3
  -6   1   2 119.377 8.16990   8
   5  -1  -2 2.78051 1.50687   8
  -5  -1   2 2.79702 2.00664   5
  -5  -1   2 4.06294 2.18672   3
  -5  -1   2 2.05451 1.37858   8
  -5   1   2 4.11838 1.90605  10
  -5   1   2 5.22350 1.98810   3
  -5   1   2 4.23854 2.01926   8
  -4  -1   2 52.5325 3.56653   8
  -4  -1   2 45.1428 4.38046   5
   4  -1  -2 46.9982 3.85361   8
  -4   1   2 42.3726 4.71884   5
  -4   1   2 50.3221 4.05894   8
  -4   1   2 42.8555 3.64236  10
  -3  -1   2 889.471 39.4043   8
   3  -1  -2 843.263 39.8234   8
  -3   1   2 711.005 39.4820  10
  -3   1   2 801.009 39.7597   8
   3   1  -2 741.487 39.9492   5
   3   1  -2 838.171 39.2972   8
   1  -1  -2 348.456 17.6369   8
  -1  -1   2 367.982 17.2348   5
  -1   1   2 370.634 17.6910   8
   1   1  -2 338.532 17.3831   8
   1   1  -2 341.818 17.2875   5
   0  -1  -2 160.365 8.40758   8
   0  -1  -2 171.894 8.49798   5
   0   1   2 167.881 8.51694   5
   0   1   2 160.531 8.41269   8
  -1  -1  -2 2291.82 104.897   5
   1   1   2 2290.82 104.983   5
  -1   1  -2 1922.37 104.846   5
  -2  -1  -2 351.313 17.5881   5
  -2  -1  -2 303.304 17.2337  10
   2   1   2 361.270 17.8556   5
  -2   1  -2 322.137 17.3020  10
  -2   1  -2 351.768 17.2288   8
  -3  -1  -2 8.37854 2.09910   5
  -3  -1  -2 10.1159 2.15435  10
  -3  -1  -2 16.0884 1.82757   8
  -3   1  -2 13.5868 2.34283  10
  -3   1  -2 11.7418 2.53348   5
  -3   1  -2 15.3645 2.25172   8
   3   1   2 11.6537 2.68443   5
  -4  -1  -2 345.874 18.7849  10
  -4  -1  -2 335.876 19.0182   5
  -4  -1  -2 335.479 18.9738   3
  -4  -1  -2 373.419 17.8594   8
  -4   1  -2 330.421 19.3155   5
   4   1   2 354.906 19.5480   5
  -4   1  -2 377.641 18.5032   8
  -4   1  -2 342.577 18.6454  10
  -5  -1  -2 207.322 12.1173  10
  -5  -1  -2 191.870 11.5697   3
  -5  -1  -2 195.505 10.7055   8
   5   1   2 180.225 12.5714   5
  -5   1  -2 207.978 11.4743   8
  -5   1  -2 205.437 11.8486  10
  -5   1  -2 182.033 11.4874   3
  -6  -1  -2 3.19627 1.55705   8
  -6  -1  -2 0.59497 2.55576   3
  -6  -1  -2 7.73285 3.25388  10
  -6   1  -2 1.27790 2.66639  10
  -6   1  -2 4.46412 2.20558   8
  -7  -1  -2 2.61530 3.21327  10
  -7  -1  -2 0.54805 1.69574   8
  -7  -1  -2 5.70532 3.57873   3
  -7   1  -2 5.47735 3.25552  10
  -7   1  -2 -1.1942 2.05061   8
  -7   1  -2 2.74413 3.47583   3
  -8  -1  -2 22.8005 5.06273   3
  -8   1  -2 11.5072 3.79489  10
  -8   1  -2 21.8842 5.05685   3
  -9  -1  -2 18.3243 4.90530   3
  -9   1  -2 20.5870 5.37806   3
  10  -1   2 -1.1366 3.12741   6
 -10  -1  -2 -1.1847 3.91953   3
 -10   1  -2 -0.9345 3.59227   3
  11  -1   2 2.71237 3.02146   6
 -11   1  -2 -1.6742 3.58083   3
  11   1   2 -1.8702 2.31485   6
  12  -1   2 11.5514 2.56492   6
 -12  -1  -2 11.9711 2.37980   9
  12   1   2 8.16320 2.27122   6
  12  -2  -2 1.44062 2.39296   6
 -12  -2   2 3.65897 1.98164   9
 -11  -2   2 4.46918 2.52598   9
  11  -2  -2 1.04287 2.89331   6
  11   2  -2 5.37025 2.26907   6
  11   2  -2 4.09513 3.07949   4
  10  -2  -2 22.0575 4.32023   6
  10   2  -2 21.8889 4.53252   4
 -10   2   2 25.0982 5.16923   3
   9  -2  -2 96.2249 8.45315   6
  -9   2   2 105.228 9.10968   3
   8  -2  -2 224.033 14.2319   4
   8  -2  -2 242.592 14.8295   6
  -8   2   2 262.290 15.2572   3
   7  -2  -2 136.308 9.37844   6
  -7  -2   2 146.441 9.91077   3
   7  -2  -2 127.733 8.93338   4
  -7  -2   2 128.924 7.73584   8
  -7   2   2 143.406 9.61827   3
  -7   2   2 128.530 9.06714   8
  -6  -2   2 28.9082 4.22558   3
   6  -2  -2 32.3175 4.37825   4
   6  -2  -2 34.5231 4.32838   6
  -6  -2   2 27.4562 2.64769   8
  -6   2   2 26.9736 4.21206   3
  -6   2   2 29.4045 4.11176   8
  -5  -2   2 8.18407 1.42766   8
  -5  -2   2 8.22773 2.66162   3
   5  -2  -2 11.0328 2.57899   6
  -5  -2   2 7.78774 1.98770   5
   5   2  -2 4.10263 2.33023   5
  -5   2   2 9.17380 2.47335   8
  -5   2   2 8.93553 1.98165  10
  -5   2   2 11.4111 2.64509   3
  -4  -2   2 476.212 23.8417   5
   4  -2  -2 439.831 23.6316   8
   4  -2  -2 456.622 24.4829   6
  -4  -2   2 479.632 22.7110   8
   4   2  -2 452.961 24.0944   5
  -4   2   2 428.370 23.1532  10
  -4   2   2 477.110 23.8127   8
   3  -2  -2 3039.55 151.956   8
  -3  -2   2 3171.28 151.832   5
  -3   2   2 3226.11 152.045   8
   3   2  -2 3124.83 150.983   8
   3   2  -2 3132.70 152.095   5
   2  -2  -2 3184.17 155.810   8
  -2  -2   2 3382.64 155.488   5
  -2   2   2 3176.59 155.824   8
   2   2  -2 3164.06 155.063   8
   2   2  -2 3214.49 155.669   5
   1  -2  -2 2145.37 107.241   8
  -1   2   2 2198.41 107.303   8
   1   2  -2 2310.08 107.002   5
   0  -2  -2 1950.88 97.7989   8
   0   2   2 2102.78 97.8848   8
  -1  -2  -2 185.700 9.65217   8
  -1  -2  -2 198.441 10.4567   5
   1   2   2 197.024 10.4865   5
  -2  -2  -2 149.814 7.26319   8
  -2  -2  -2 131.668 8.09806  10
  -2  -2  -2 155.375 8.47489   5
   2   2   2 143.076 10.4657   5
  -2   2  -2 136.484 8.07863  10
  -2   2  -2 150.247 8.38981   8
  -3  -2  -2 11.9090 1.20302   8
  -3  -2  -2 15.0800 2.51828  10
  -3  -2  -2 13.1083 2.30550   5
  -3   2  -2 9.29148 1.98333  10
   3   2   2 8.59674 2.42198   5
  -3   2  -2 10.5361 2.20192   8
  -3   2  -2 7.84741 2.42204   5
  -4  -2  -2 131.359 9.18779  10
  -4  -2  -2 129.240 8.45156   5
  -4  -2  -2 131.915 6.88439   8
  -4  -2  -2 128.721 8.49229   3
  -4   2  -2 125.085 8.92645   5
   4   2   2 131.092 9.11448   5
  -4   2  -2 123.225 7.99430  10
  -4   2  -2 138.406 8.33877   8
  -5  -2  -2 134.808 9.08796  10
  -5  -2  -2 137.185 7.25266   8
  -5  -2  -2 135.414 8.55044   3
  -5   2  -2 118.972 8.59076   3
  -5   2  -2 141.092 8.90305   8
  -5   2  -2 128.962 8.63992  10
  -6  -2  -2 26.4355 2.41453   8
  -6  -2  -2 25.1020 4.06162   3
  -6  -2  -2 21.4586 4.04831  10
  -6   2  -2 25.3138 4.08534  10
  -6   2  -2 29.1994 4.57365   3
   6   2   2 22.9372 4.24066   5
  -6   2  -2 24.9710 3.70854   8
  -7  -2  -2 83.2722 7.27907   3
  -7   2  -2 75.8501 7.10619  10
  -7   2  -2 73.2746 7.30100   3
  -7   2  -2 69.2427 6.36820   8
   8  -2   2 49.1543 6.27419   6
  -8  -2  -2 53.0560 6.78683   3
  -8   2  -2 47.0847 6.03902  10
  -8   2  -2 44.0265 6.37247   3
  -9  -2  -2 22.2463 5.05511   3
   9  -2   2 20.0196 4.49253   6
  -9   2  -2 18.4109 5.10281   3
  10  -2   2 19.5955 4.49501   6
  10   2   2 15.0676 3.87442   4
 -10   2  -2 18.7075 4.55384   3
  11  -2   2 20.9188 4.07787   6
 -11   2  -2 19.1849 4.01256   3
 -12  -2  -2 1.52516 1.47134   9
  12  -2   2 4.38669 2.03187   6
  12   2   2 6.40424 1.97197   6
 -12  -3   2 8.89505 1.95688   9
  12  -3  -2 7.77851 2.58901   6
  12   3  -2 14.2137 2.87067   4
  11  -3  -2 1.85518 2.73568   6
 -11  -3   2 3.08148 2.29592   9
  11   3  -2 0.23168 2.28827   6
  11   3  -2 0.84062 2.85171   4
  10  -3  -2 3.53633 3.48349   6
 -10  -3   2 1.63835 2.74907   9
 -10   3   2 -2.2112 3.25474   3
  -9  -3   2 74.7884 6.33454   9
   9  -3  -2 81.7207 7.83688   6
  -9   3   2 77.0895 7.73700   3
   8  -3  -2 2.84508 3.26820   6
  -8   3   2 6.03764 3.55846   3
   7  -3  -2 163.527 10.2857   6
   7  -3  -2 137.268 9.71865   4
  -7   3   2 135.260 10.1046   8
  -7   3   2 156.677 10.1871   3
   6  -3  -2 115.367 9.03555   4
   6  -3  -2 114.736 8.55486   6
   6   3  -2 109.290 8.70852   5
  -6   3   2 121.396 8.47273   8
  -6   3   2 127.455 8.37399   3
   5  -3  -2 118.956 7.02810   2
   5  -3  -2 129.561 8.34863   6
   5   3  -2 125.896 8.57111   5
  -5   3   2 114.990 7.18335  10
  -5   3   2 123.101 8.25663   8
  -5   3   2 114.219 7.67895   3
  -4  -3   2 80.4349 4.91464   9
   4  -3  -2 73.3612 5.86323   6
  -4  -3   2 89.2830 5.72324   5
   4   3  -2 75.3156 6.11377   5
  -4   3   2 76.6618 5.21638  10
  -4   3   2 81.6597 5.94499   8
  -3  -3   2 218.081 11.1563   5
   3  -3  -2 193.087 11.5852   6
  -3  -3   2 196.731 10.6260   9
   3   3  -2 197.500 12.4708   5
  -3   3   2 215.476 11.6687   8
   2  -3  -2 244.050 13.6937   8
  -2   3   2 260.476 13.8600   8
   2   3  -2 276.276 13.7153   5
   2   3  -2 260.509 12.7036   8
   2   3  -2 250.223 12.7209   8
   1  -3  -2 636.141 32.9136   8
   1   3  -2 693.010 32.8199   5
   1   3  -2 652.556 32.5194   8
  -1   3   2 679.150 33.0872   8
   0  -3  -2 32.1166 2.53620   8
   0   3   2 32.1604 2.74067   8
   0   3   2 34.4597 3.27652   5
   0   3  -2 36.9661 2.66154   5
   0   3  -2 32.0923 2.71499   8
  -1  -3  -2 787.775 41.0741   8
  -1  -3  -2 874.797 41.9722   5
   1   3   2 834.955 41.1517   8
   1   3   2 897.990 42.1633   5
  -2  -3  -2 1177.39 57.9908   5
   2   3   2 1157.88 58.2546   5
  -2   3  -2 1198.11 58.0185   8
  -3  -3  -2 461.093 23.8803   6
  -3  -3  -2 486.695 24.1983   5
   3  -3   2 455.974 24.1545   6
  -3  -3  -2 462.766 23.9434  10
  -3   3  -2 493.051 24.2132   8
   3   3   2 493.656 24.7029   5
  -3   3  -2 458.427 23.7128  10
  -3   3  -2 400.252 24.6314   5
  -4  -3  -2 67.3176 5.22720   3
   4  -3   2 81.0141 6.08466   6
   4  -3   2 73.7538 4.75206   2
  -4   3  -2 68.9710 5.29919  10
   4   3   2 68.3604 6.47915   5
  -4   3  -2 76.7943 5.99226   8
   5  -3   2 20.7140 3.77951   6
  -5  -3  -2 17.5110 3.21208   3
   5  -3   2 20.0797 2.44268   2
  -5   3  -2 18.9113 3.29320   8
   5   3   2 9.58806 3.02894   5
  -5   3  -2 18.5441 3.06952  10
  -5   3  -2 18.1976 3.49952   3
   6  -3   2 70.0772 6.48264   6
  -6  -3  -2 64.0624 8.31145   3
  -6   3  -2 62.1199 6.06411   8
  -6   3  -2 55.8369 6.29362   3
  -6   3  -2 66.6577 5.89463  10
   7  -3   2 421.712 24.0133   6
  -7  -3  -2 440.202 23.8078   3
  -7   3  -2 431.001 23.5494  10
  -7   3  -2 433.845 24.0165   3
   8  -3   2 2.34230 3.35451   6
  -8   3  -2 5.58254 3.77859   3
  -8   3  -2 5.93094 2.90895  10
   9  -3   2 5.12320 3.62440   6
  -9   3  -2 2.65848 3.64332   3
 -10  -3  -2 43.4681 4.78985   9
  10  -3   2 35.1779 5.76286   6
 -10   3  -2 56.9432 6.92853   3
 -11  -3  -2 2.06882 2.01561   9
  11  -3   2 5.62938 2.90800   6
  11   3   2 6.75034 3.04011   4
 -11   3  -2 1.01576 2.73571   3
 -11  -4   2 1.69093 2.17405   9
  11  -4  -2 -0.7819 2.32885   6
  11   4  -2 4.53315 2.94054   4
  10  -4  -2 11.6988 3.82970   6
 -10  -4   2 14.9092 3.16879   9
 -10   4   2 16.1112 4.38260   3
  -9  -4   2 53.5342 5.44844   9
   9  -4  -2 47.7350 6.17852   6
  -9   4   2 47.5384 6.12758   3
   8  -4  -2 190.311 13.1028   6
  -8  -4   2 210.219 11.8410   9
   7  -4  -2 31.0244 4.87548   6
  -7  -4   2 29.5568 3.71435   9
  -7   4   2 40.4016 4.88845   3
  -6  -4   2 17.8893 2.69166   9
   6  -4  -2 17.9399 3.87161   6
  -6   4   2 24.4995 4.54056   8
   6   4  -2 16.3575 3.34966   5
  -6   4   2 15.0836 3.13393   3
   5  -4  -2 50.5786 6.47054   6
   5  -4  -2 61.2460 4.47442   2
   5   4  -2 49.8610 5.13705   5
  -5   4   2 48.4184 5.23795   8
  -5   4   2 55.3869 4.77181   3
  -4  -4   2 117.367 6.78098   9
   4  -4  -2 114.014 8.12331   6
  -4  -4   2 115.356 7.22388   5
   4  -4  -2 117.005 7.18720   2
  -4   4   2 121.761 8.06019   8
   4   4  -2 117.972 8.05482   5
  -4   4   2 110.611 7.07928   3
  -3  -4   2 358.031 18.0332   9
   3  -4  -2 357.632 19.2613   6
   3  -4  -2 350.808 18.5434   2
  -3  -4   2 364.058 18.4705   5
  -3  -4   2 338.025 18.5888   6
   3   4  -2 369.139 19.0922   5
  -3   4   2 355.229 19.0825   8
   2  -4  -2 867.281 45.6203   6
   2  -4  -2 915.103 45.0783   2
   2  -4  -2 833.339 45.4750   8
  -2  -4   2 883.111 44.5003   9
   2   4  -2 949.566 44.0682   8
  -2   4   2 975.282 45.5147   8
   2   4  -2 991.654 45.3266   5
   2   4  -2 871.851 44.0444   8
   1  -4  -2 1587.97 82.3924   6
   1  -4  -2 1554.06 81.7659   8
  -1  -4   2 1626.98 81.3562   9
   1  -4  -2 1631.26 81.9057   2
  -1   4   2 1783.00 82.0927   8
  -1   4   2 1813.83 82.2876   5
   1   4  -2 1766.31 81.4824   8
   0  -4  -2 250.412 14.8728   6
   0  -4  -2 272.979 14.5662   2
   0  -4   2 253.935 13.9213   9
   0  -4   2 268.302 14.3964   2
   0   4   2 305.374 14.9918   5
   0   4   2 280.100 14.3173   8
   0   4  -2 276.930 14.9287   8
   0   4  -2 294.257 14.4495   5
   1  -4   2 92.1829 6.24202   6
  -1  -4  -2 89.1835 6.23857   6
   1  -4   2 93.3472 5.77330   2
   1  -4   2 85.4961 5.20898   9
  -1   4  -2 96.6130 6.07860   8
   1   4   2 90.3021 5.06488   8
   1   4   2 96.7226 6.38260   5
  -2  -4  -2 344.214 18.2592   5
  -2  -4  -2 325.383 17.2617   9
   2   4   2 352.242 18.7032   5
  -2   4  -2 358.252 18.3814   8
   3  -4   2 1422.69 68.8854   9
   3  -4   2 1421.06 69.3520   2
   3  -4   2 1450.64 70.2612   6
  -3  -4  -2 1386.61 69.8521   6
  -3  -4  -2 1418.03 68.8946   9
  -3   4  -2 1337.92 69.3904  10
   3   4   2 1410.14 70.5015   5
  -3   4  -2 1498.90 70.2294   8
   4  -4   2 1044.49 50.4610   2
  -4  -4  -2 1009.95 50.0800   9
   4  -4   2 1052.18 51.6012   6
  -4   4  -2 957.812 50.6445  10
   4   4   2 1009.64 52.0479   5
  -4   4  -2 1062.64 51.5484   8
   5  -4   2 307.599 16.2920   2
   5  -4   2 327.081 17.9035   6
  -5  -4  -2 321.534 16.1831   9
  -5   4  -2 291.751 16.7246  10
  -5   4  -2 303.423 19.5716   3
  -5   4  -2 314.154 17.6996   8
   5   4   2 295.044 18.3188   5
   6  -4   2 7.26672 3.56268   6
   6  -4   2 7.95587 2.03478   2
  -6  -4  -2 2.56343 2.08237   9
  -6   4  -2 6.61974 2.49593  10
  -6   4  -2 2.91136 2.57324   8
  -6   4  -2 8.83761 3.32521   3
   7  -4   2 55.1154 6.71317   6
  -7  -4  -2 43.2600 4.90248   9
  -7   4  -2 47.7253 5.22622  10
  -7   4  -2 51.8471 6.58138   3
  -8  -4  -2 1.93224 2.56734   9
   8  -4   2 -0.7991 3.53014   6
  -8   4  -2 -4.8968 2.19324  10
  -8   4  -2 1.99429 3.28889   3
   9  -4   2 21.4588 4.70844   6
  -9  -4  -2 18.8437 3.24881   9
  -9   4  -2 32.2346 5.27905   3
  10  -4   2 23.4463 4.62347   6
 -10  -4  -2 32.9151 3.74943   9
 -10   4  -2 38.0116 5.28951   3
 -11  -4  -2 15.1825 2.37108   9
  11  -4   2 15.0965 3.37900   6
 -11   4  -2 14.9993 3.40262   3
  11   4   2 5.61305 2.76847   4
  11  -5  -2 3.39466 2.52394   6
 -11  -5   2 2.31537 1.94620   9
  11   5  -2 2.95238 2.66375   4
  10  -5  -2 3.31703 3.06957   6
 -10  -5   2 -0.5965 2.36418   9
 -10   5   2 -2.4586 2.31377   3
   9  -5  -2 0.24390 3.32370   6
  -9  -5   2 2.62353 2.47749   9
  -9   5   2 0.76678 2.76771   3
   8  -5  -2 32.7904 5.31921   6
  -8  -5   2 25.3511 3.73124   9
  -8   5   2 24.8335 4.02554   3
   7  -5  -2 9.35703 5.00318   6
  -7   5   2 3.91092 2.53526   3
   6  -5  -2 1.47021 2.61940   6
  -6  -5   2 4.28768 2.22016   9
  -6   5   2 5.66506 2.43282   3
   6   5  -2 4.55584 2.97133   5
   5  -5  -2 10.6176 2.46384   2
  -5  -5   2 9.39259 2.24736   9
   5  -5  -2 12.6239 3.56800   6
   5   5  -2 8.81505 2.43510   5
  -5   5   2 16.6339 2.78251   3
  -4  -5   2 54.5713 4.29201   9
   4  -5  -2 48.8484 5.55681   6
   4  -5  -2 58.6900 4.95322   2
   4   5  -2 54.6265 5.26578   5
  -4   5   2 63.1047 4.45820   3
  -4   5   2 42.9602 4.97301   8
   3  -5  -2 42.5972 4.86090   6
  -3  -5   2 35.2813 3.39483   2
  -3  -5   2 39.5926 3.77735   6
   3  -5  -2 31.3790 2.73107   9
   3  -5  -2 40.4732 4.01278   2
  -3  -5   2 36.7592 3.19972   9
  -3   5   2 36.6795 4.14160   8
   3   5  -2 35.8148 4.00626   5
   2  -5  -2 218.696 12.2292   2
   2  -5  -2 222.097 12.9232   6
   2  -5  -2 214.838 11.2179   9
  -2  -5   2 222.931 11.4943   9
  -2  -5   2 212.325 11.8080   2
  -2  -5   2 204.680 12.1801   6
  -2   5   2 224.177 12.5007   8
   2   5  -2 223.311 12.3328   5
  -2   5   2 235.230 12.6832   5
   2   5  -2 201.213 10.6397   8
   1  -5  -2 0.60970 1.67456   2
   1  -5  -2 1.17096 0.95526   9
   1  -5  -2 2.93360 2.04181   6
  -1  -5   2 4.74655 1.67716   2
  -1  -5   2 3.27525 1.83271   6
  -1  -5   2 3.49007 1.26843   9
   1   5  -2 3.21344 1.52465   5
  -1   5   2 2.34654 1.45722   8
   1   5  -2 3.54655 1.20703   8
  -1   5   2 4.54596 1.95259   5
   0  -5  -2 342.401 17.8200   2
   0  -5   2 342.458 17.6818   2
   0  -5  -2 327.941 18.3283   6
   0  -5  -2 324.184 16.8856   9
   0  -5   2 328.860 17.0207   9
   0  -5   2 312.868 18.0216   6
   0   5   2 336.802 18.1204   5
   0   5  -2 359.127 17.7428   5
   0   5  -2 338.428 17.5410   8
   0   5   2 351.973 17.4582   8
   1  -5   2 12.7691 2.39499   2
   1  -5   2 11.4089 2.75866   6
  -1  -5  -2 8.93594 1.53190   9
  -1  -5  -2 13.3581 2.67170   6
   1  -5   2 10.1736 1.67317   9
  -1  -5  -2 11.7084 2.17205   2
  -1   5  -2 9.27601 1.94665   5
  -1   5  -2 10.4479 2.12816   8
   1   5   2 13.1151 2.65011   5
   1   5   2 12.0695 1.48919   8
   2  -5   2 178.375 10.8781   6
  -2  -5  -2 173.897 10.6075   6
   2  -5   2 175.699 9.40254   9
  -2  -5  -2 176.672 9.96635   2
  -2  -5  -2 168.625 9.31639   9
   2  -5   2 175.337 10.0848   2
  -2   5  -2 169.249 9.63486  10
   2   5   2 183.655 10.9414   5
  -2   5  -2 175.151 10.4767   8
  -3  -5  -2 61.6079 5.35337   6
   3  -5   2 67.1773 5.05280   2
   3  -5   2 64.4966 4.21708   9
  -3  -5  -2 59.5986 4.13343   9
   3  -5   2 62.5996 5.82830   6
  -3   5  -2 53.7398 5.26196   8
  -3   5  -2 51.3871 4.29445  10
   3   5   2 57.9007 5.75552   5
   4  -5   2 512.424 26.7359   6
  -4  -5  -2 497.676 24.9325   9
  -4   5  -2 489.276 26.4670   8
   4   5   2 480.790 26.9561   5
   5  -5   2 637.120 31.8229   2
   5  -5   2 651.746 33.3622   6
  -5  -5  -2 658.417 31.4209   9
  -5   5  -2 622.939 33.2109   8
  -5   5  -2 621.398 32.4395   3
  -5   5  -2 571.244 31.7145  10
   6  -5   2 214.311 14.1790   6
   6  -5   2 225.019 12.4810   2
  -6  -5  -2 230.831 12.3716   9
  -6   5  -2 204.038 12.5164  10
  -6   5  -2 230.082 13.5807   3
  -7  -5  -2 0.11708 2.30906   9
   7  -5   2 -1.5484 3.48936   6
  -7   5  -2 -0.9179 1.89284  10
  -7   5  -2 0.94010 3.11727   3
  -8  -5  -2 0.49632 2.33853   9
   8  -5   2 5.40471 3.70398   6
  -8   5  -2 1.10374 2.88731   3
  -9  -5  -2 -0.1097 2.20541   9
   9  -5   2 -7.4860 3.11463   6
  -9   5  -2 0.01572 2.94000   3
 -10  -5  -2 -1.4697 2.11395   9
  10  -5   2 -0.8501 2.62450   6
 -10   5  -2 1.14710 2.30294   3
  11  -5   2 2.33335 2.17497   6
 -11  -5  -2 1.81269 1.44140   9
 -11   5  -2 6.10098 2.29221   3
  11   5   2 7.24231 2.05011   4
 -10  -6   2 6.36939 2.43032   9
  10  -6  -2 1.90028 2.73887   6
   9  -6  -2 20.4733 8.24346   6
  -9   6   2 28.8347 3.75584   3
   8  -6  -2 13.7607 4.01840   6
  -8  -6   2 17.9873 3.36073   9
  -8   6   2 8.52818 2.83418   3
   7  -6  -2 11.8895 4.01532   6
  -7  -6   2 18.2432 3.25776   9
  -7   6   2 11.8001 2.94181   3
   6  -6  -2 33.0177 7.18941   6
  -6  -6   2 24.6546 4.57445   9
  -6   6   2 30.6754 3.99132   3
   5  -6  -2 48.8209 4.80646   2
  -5  -6   2 52.2979 4.54836   9
   5  -6  -2 55.1548 6.38465   6
  -5   6   2 33.3772 4.19074   3
   5   6  -2 36.7086 5.39064   5
  -4  -6   2 169.391 10.3689   6
  -4  -6   2 176.697 9.79224   9
   4  -6  -2 174.427 10.6806   2
   4  -6  -2 197.033 11.9792   6
  -4  -6   2 171.344 9.79030   2
   4   6  -2 167.752 11.1054   5
  -4   6   2 160.144 11.7875   8
   3  -6  -2 116.673 7.81298   2
  -3  -6   2 115.207 7.21732   2
  -3  -6   2 113.560 6.90377   9
  -3  -6   2 111.008 7.62427   6
   3  -6  -2 112.668 6.56040   9
   3  -6  -2 121.939 8.95181   6
  -3   6   2 117.574 8.13386   8
   3   6  -2 99.9646 9.66565   5
  -3   6   2 117.561 8.12345   5
   2  -6  -2 467.850 24.4996   2
  -2  -6   2 440.450 24.5388   6
  -2  -6   2 479.079 24.2005   2
   2  -6  -2 473.833 23.3918   9
   2  -6  -2 488.066 25.4114   6
  -2  -6   2 479.923 23.6343   9
  -2   6   2 454.667 24.6517   8
  -2   6   2 474.417 24.8861   5
   2   6  -2 456.751 24.5965   5
   1  -6  -2 92.0390 9.51600   2
   1  -6  -2 100.373 5.77971   9
  -1  -6   2 88.2522 7.00513   6
  -1  -6   2 96.2866 6.76278   2
  -1  -6   2 102.476 6.04488   9
   1   6  -2 93.7604 6.73222   5
  -1   6   2 102.623 7.23897   5
   1   6  -2 108.398 6.05069   8
  -1   6   2 103.263 6.68687   8
   0  -6   2 32.7516 3.03645   9
   0  -6  -2 37.0799 4.78689   6
   0  -6   2 33.6700 4.17892   2
   0  -6   2 27.8211 3.93394   6
   0  -6  -2 35.1239 4.02658   2
   0  -6  -2 33.6299 2.75763   9
   0   6   2 30.3599 3.94718   5
   0   6  -2 28.3117 3.16949   8
   0   6  -2 31.4336 3.46060   5
   0   6   2 29.5984 3.01762   8
   1  -6   2 308.360 15.4694   9
   1  -6   2 300.223 16.9700   6
  -1  -6  -2 296.873 15.2971   9
   1  -6   2 310.575 16.3652   2
  -1  -6  -2 305.824 16.3369   2
   1   6   2 278.854 14.9234   8
  -1   6  -2 299.799 16.3216   8
   1   6   2 297.382 16.8583   5
  -2  -6  -2 203.232 12.5558   6
  -2  -6  -2 209.356 11.1289   9
   2  -6   2 208.738 12.8126   6
  -2  -6  -2 204.300 11.8189   2
   2  -6   2 205.660 11.1864   9
   2  -6   2 223.440 12.1954   2
  -2   6  -2 208.012 12.3136   8
   2   6   2 205.704 12.8055   5
  -2   6  -2 203.641 11.9615  10
  -2   6  -2 217.218 12.1867   5
  -3  -6  -2 279.832 15.6176   6
   3  -6   2 277.454 15.0791   2
  -3  -6  -2 267.535 14.1619   9
   3  -6   2 276.247 14.2017   9
   3  -6   2 280.593 16.2195   6
   3   6   2 239.956 15.8720   5
  -3   6  -2 275.280 15.7115   8
  -4  -6  -2 151.138 8.41553   9
   4  -6   2 153.446 10.5490   6
   4  -6   2 152.972 9.27231   2
  -4   6  -2 149.465 9.95736   8
  -4   6  -2 131.451 8.97365   3
   4   6   2 129.880 10.1118   5
   5  -6   2 135.583 10.3025   6
   5  -6   2 136.952 8.59973   2
  -5  -6  -2 120.998 7.85758   9
  -5   6  -2 127.342 8.70562   3
  -6  -6  -2 99.4100 6.72595   9
   6  -6   2 89.9860 6.79980   2
   6  -6   2 102.278 9.11749   6
  -6   6  -2 92.3958 7.49258   3
   7  -6   2 9.49987 4.36351   6
  -7  -6  -2 14.5761 2.94307   9
  -7   6  -2 9.31343 3.21557   3
  -8  -6  -2 13.9437 2.95636   9
   8  -6   2 12.5700 4.08804   6
  -8   6  -2 13.1758 3.56109   3
  -9  -6  -2 12.0518 2.57236   9
   9  -6   2 10.0608 3.65098   6
  -9   6  -2 9.17663 2.83063   3
 -10  -6  -2 10.6134 2.05464   9
  10  -6   2 7.74585 3.08509   6
 -10   6  -2 10.4236 2.45314   3
  10  -7  -2 -1.0131 3.64879   6
 -10  -7   2 0.43054 1.89952   9
   9  -7  -2 1.62126 2.98310   6
  -9  -7   2 -0.2310 1.91284   9
  -8  -7   2 0.16949 2.26279   9
   8  -7  -2 -0.2097 3.31649   6
  -7  -7   2 -0.6616 2.40342   9
   7  -7  -2 2.85936 3.48444   6
   6  -7  -2 10.5118 4.01822   6
  -6  -7   2 -1.5944 2.41936   9
   5  -7  -2 18.7190 4.55488   6
  -5  -7   2 14.3042 2.82877   9
   4  -7  -2 7.24740 2.95844   2
  -4  -7   2 9.35290 2.39798   9
   4  -7  -2 6.81448 3.54498   6
  -4  -7   2 9.90158 2.70939   6
  -4  -7   2 6.02960 2.13137   2
  -3  -7   2 63.2051 5.57637   6
   3  -7  -2 59.8567 4.21977   9
   3  -7  -2 63.6153 6.90867   6
  -3  -7   2 60.6566 4.67387   9
  -3  -7   2 55.2908 4.94641   2
   3  -7  -2 64.0764 5.91704   2
   3   7  -2 54.7873 5.58298   5
  -3   7   2 49.9096 5.50271   8
   2  -7  -2 272.283 14.6883   2
  -2  -7   2 258.914 14.2619   2
   2  -7  -2 265.580 13.2869   9
  -2  -7   2 265.952 13.5650   9
   2  -7  -2 265.641 15.5352   6
  -2  -7   2 257.996 14.7014   6
   2   7  -2 244.414 14.5821   5
  -2   7   2 234.593 14.7483   5
  -2   7   2 217.400 14.3790   8
  -1  -7   2 -0.1351 1.51356   9
   1  -7  -2 -2.8061 2.06400   2
  -1  -7   2 1.30497 2.43022   2
   1  -7  -2 -2.6951 1.12673   9
   1  -7  -2 0.22373 2.65183   6
  -1  -7   2 -1.7538 2.02112   6
  -1   7   2 0.78966 1.50829   8
   1   7  -2 3.19161 1.72885   5
   0  -7   2 28.4393 3.06306   9
   0  -7   2 30.2451 4.27798   6
   0  -7  -2 25.1292 3.87412   2
   0  -7  -2 36.0447 4.87404   6
   0  -7   2 25.6484 3.80623   2
   0  -7  -2 26.0440 2.61958   9
   0   7   2 21.7274 2.77622   8
   0   7  -2 32.9014 3.21149   8
   0   7   2 24.6148 3.76364   5
   0   7  -2 19.7761 3.09902   5
  -1  -7  -2 65.1511 5.57716   2
   1  -7   2 62.8482 5.90070   2
  -1  -7  -2 55.2311 6.06139   6
  -1  -7  -2 56.7746 4.22453   9
   1  -7   2 58.6033 4.50118   9
   1  -7   2 65.4003 6.26381   6
  -1   7  -2 57.7621 5.14378   8
  -1   7  -2 60.9199 5.26685   5
  -2  -7  -2 7.01444 3.11907   6
   2  -7   2 14.0187 3.55090   6
   2  -7   2 8.20175 2.16764   9
  -2  -7  -2 7.65722 1.92928   9
   2  -7   2 5.96334 2.79655   2
  -2   7  -2 6.51404 2.09852   5
  -2   7  -2 10.9352 2.66267   8
   2   7   2 7.11993 2.28928   5
   3  -7   2 3.21384 2.06382   9
   3  -7   2 8.54167 2.92079   2
  -3  -7  -2 6.20450 1.98511   9
   3  -7   2 2.92387 3.45869   6
  -3  -7  -2 7.92345 3.06616   6
  -3   7  -2 -7.7554 2.94479   3
   4  -7   2 4.40410 2.69314   2
   4  -7   2 -0.0444 3.20032   6
  -4  -7  -2 1.91408 1.84958   9
  -4   7  -2 -3.5719 1.97866   3
   5  -7   2 89.3302 6.84954   2
   5  -7   2 91.6559 8.58533   6
  -5  -7  -2 89.5118 6.12539   9
  -5   7  -2 74.8962 6.48347   3
   6  -7   2 58.1786 5.33863   2
  -6  -7  -2 60.6445 5.06478   9
   6  -7   2 63.7868 7.78921   6
  -6   7  -2 52.1352 5.26576   3
  -7  -7  -2 3.79574 2.15094   9
   7  -7   2 3.47331 3.74849   6
   8  -7   2 0.29412 3.12969   6
  -8  -7  -2 7.03119 2.09729   9
  -8   7  -2 2.28416 2.21668   3
  -9  -7  -2 5.26745 1.80288   9
   9  -7   2 7.69156 3.25446   6
  -9   7  -2 0.31122 2.31255   3
   9  -8  -2 18.1978 3.41417   6
  -9  -8   2 16.6577 2.32634   9
  -8  -8   2 22.0647 3.07305   9
   8  -8  -2 15.4624 3.73057   6
  -7  -8   2 33.2146 5.00960   9
   6  -8  -2 194.103 13.2722   6
  -6  -8   2 191.152 11.0675   9
  -5  -8   2 36.7105 3.93795   9
   5  -8  -2 40.6253 5.89029   6
   4  -8  -2 103.323 9.45321   6
  -4  -8   2 104.630 7.03286   9
  -3  -8   2 144.650 8.61968   9
   3  -8  -2 132.217 9.60750   2
  -3  -8   2 132.911 10.4092   6
   3  -8  -2 163.908 11.1948   6
  -3  -8   2 135.237 9.29093   2
  -2  -8   2 120.692 7.29172   9
  -2  -8   2 112.868 8.14582   2
  -2  -8   2 108.702 8.32074   6
   2  -8  -2 120.008 6.92910   9
   1  -8  -2 28.0733 4.10527   2
  -1  -8   2 38.4192 3.82947   9
  -1  -8   2 31.1418 4.35914   2
   1  -8  -2 29.9698 3.15559   9
  -1  -8   2 25.4195 4.21535   6
   1  -8  -2 25.3127 4.83763   6
   0  -8   2 42.8773 3.98703   9
   0  -8  -2 39.4352 5.56733   6
   0  -8  -2 37.3923 3.48650   9
   0  -8   2 32.8073 4.91693   6
   0  -8   2 44.8250 5.26080   2
   0  -8  -2 41.2142 5.00906   2
   1  -8   2 660.856 34.9489   6
  -1  -8  -2 653.773 32.8297   9
   1  -8   2 678.554 33.0396   9
  -1  -8  -2 655.161 34.8390   6
   1  -8   2 654.139 34.4493   2
  -2  -8  -2 31.8605 3.33245   9
   2  -8   2 26.4740 4.15725   2
   3  -8   2 3.86378 3.60064   6
  -3  -8  -2 1.18212 2.67838   6
   3  -8   2 4.62097 2.84196   2
  -3  -8  -2 4.36111 2.07995   9
   4  -8   2 21.1730 3.71430   2
  -4  -8  -2 22.8795 2.81083   9
   4  -8   2 18.8162 4.74229   6
   5  -8   2 158.257 10.5704   2
   5  -8   2 179.407 12.1931   6
  -5  -8  -2 166.143 9.63985   9
   6  -8   2 6.74608 3.88952   6
  -6  -8  -2 11.9523 2.52311   9
  -7  -8  -2 5.92233 2.07779   9
   7  -8   2 11.1897 3.78845   6
  -8  -8  -2 44.3824 3.64300   9
   8  -8   2 36.5651 5.04899   6
   8  -9  -2 -0.7250 2.82552   6
  -8  -9   2 2.68955 1.93142   9
  -7  -9   2 30.9345 3.33881   9
   7  -9  -2 34.7673 4.97835   6
  -6  -9   2 23.1692 3.01463   9
   6  -9  -2 29.2106 5.08197   6
   5  -9  -2 3.57454 3.55317   6
  -5  -9   2 7.88961 2.56809   9
   4  -9  -2 15.3240 4.27517   6
  -4  -9   2 18.2158 3.02226   9
  -3  -9   2 69.2348 5.35950   9
   3  -9  -2 70.8967 7.77242   6
  -3  -9   2 55.9503 5.62350   6
  -2  -9   2 119.302 7.28395   9
   2  -9  -2 107.131 6.65815   9
  -2  -9   2 108.467 8.30366   6
   2  -9  -2 128.026 9.88387   6
  -2  -9   2 106.338 7.99240   2
  -1  -9   2 4.25930 2.00429   9
  -1  -9   2 2.90191 2.74065   2
   1  -9  -2 0.90599 3.09850   6
   1  -9  -2 5.43281 1.73839   9
  -1  -9   2 2.59021 2.75819   6
   0  -9  -2 32.2957 3.32059   9
   0  -9  -2 37.5271 5.48167   6
   0  -9   2 31.7983 3.43895   9
   0  -9   2 35.2620 5.23962   6
   0  -9   2 31.9671 4.36000   2
  -1  -9  -2 12.9671 2.15038   9
   1  -9   2 11.0187 3.55100   2
  -1  -9  -2 11.4872 3.82908   6
   1  -9   2 7.19472 3.45602   6
   1  -9   2 9.32701 2.36916   9
   2  -9   2 2.57492 3.32523   6
   2  -9   2 1.39210 2.70854   2
   2  -9   2 4.53052 2.05009   9
  -2  -9  -2 4.56800 1.90457   9
  -2  -9  -2 4.21387 3.24566   6
   3  -9   2 0.85447 2.73511   2
   3  -9   2 4.55484 3.88619   6
  -3  -9  -2 6.17761 2.94769   6
  -3  -9  -2 0.75759 1.72339   9
   4  -9   2 1.00323 2.78047   2
  -4  -9  -2 -1.1242 1.65078   9
   4  -9   2 -0.3970 3.37787   6
   5  -9   2 3.59058 2.85458   2
   5  -9   2 -1.7827 4.29072   6
  -5  -9  -2 3.57612 1.75424   9
  -6  -9  -2 0.32496 1.64113   9
   6  -9   2 -2.9135 3.01584   6
   7  -9   2 0.20392 2.60529   6
  -7  -9  -2 2.00806 1.79671   9
   6 -10  -2 9.35110 2.98838   6
  -6 -10   2 14.5911 2.06583   9
  -5 -10   2 32.2933 3.34456   9
   5 -10  -2 34.5940 4.91509   6
   4 -10  -2 24.8043 4.58798   6
  -4 -10   2 25.2867 2.95766   9
  -3 -10   2 36.1432 3.80507   9
   3 -10  -2 48.4641 6.74806   6
  -2 -10   2 17.8366 2.79294   9
   2 -10  -2 24.7471 4.75731   6
  -1 -10   2 106.461 7.67609   2
   1 -10  -2 96.4468 6.82233   9
  -1 -10   2 100.581 6.48168   9
  -1 -10   2 96.4416 7.60333   6
   1 -10  -2 108.629 8.68303   6
   0 -10   2 72.8779 7.25009   6
   0 -10  -2 96.9649 7.98904   6
   0 -10   2 88.0401 7.07464   2
   0 -10   2 92.3328 5.91957   9
   0 -10  -2 88.0234 5.72801   9
   1 -10   2 10.2606 2.14908   9
   1 -10   2 14.1025 3.67701   6
   1 -10   2 11.7674 2.98678   2
  -1 -10  -2 6.97297 3.30951   6
   2 -10   2 60.9955 6.46306   2
  -2 -10  -2 58.8898 4.18415   9
   3 -10   2 54.5161 5.56502   2
   3 -10   2 66.9520 6.45091   6
  -3 -10  -2 50.7931 3.87956   9
  -4 -10  -2 37.2373 3.31053   9
   4 -10   2 46.3743 5.66335   6
  -5 -10  -2 22.0393 2.75260   9
   5 -10   2 32.6430 4.74363   6
  -6 -10  -2 3.25330 1.22716   9
   6 -10   2 5.69956 3.98651   6
  -4 -11   2 52.9525 3.69482   9
   4 -11  -2 58.3035 5.39094   6
  -3 -11   2 1.87638 1.45042   9
   3 -11  -2 1.79828 2.57734   6
   2 -11  -2 4.82832 2.62263   6
  -2 -11   2 6.31399 1.67310   9
   1 -11  -2 40.3264 4.79125   6
  -1 -11   2 32.8609 4.17104   6
  -1 -11   2 32.7772 3.10327   9
   0 -11  -2 10.2362 3.03762   6
   0 -11   2 9.11455 2.70801   6
   0 -11   2 5.95027 1.55184   9
   1 -11   2 1.30318 2.07593   6
  -1 -11  -2 -0.0058 1.16227   9
  -1 -11  -2 3.81870 2.39935   6
   2 -11   2 15.7927 3.19016   6
  -2 -11  -2 8.01445 1.40474   9
  -3 -11  -2 5.31390 1.57874   9
   3 -11   2 3.94119 2.08091   6
   4 -11   2 3.00491 2.14301   6
  12   0  -3 1.42959 2.22608   6
  11   0  -3 -3.9966 2.27076   6
  11   0  -3 5.14067 3.08869   4
  10   0  -3 7.72295 3.28519   4
  10   0  -3 3.56266 2.76719   6
   9   0  -3 -0.2380 2.92426   4
   9   0  -3 -1.3378 2.60893   6
  -9   0   3 0.32525 3.52483   3
   8   0  -3 3.20965 3.11665   4
  -8   0   3 4.71785 3.60047   3
  -8   0   3 -3.1855 2.23987   8
  -7   0   3 -0.2630 2.81684   3
  -7   0   3 -1.7756 1.84934   8
  -6   0   3 -2.4622 1.36110   8
  -6   0   3 1.38849 2.31914   3
  -5   0   3 8.77209 2.20440   3
  -5   0   3 -0.8731 1.87825   5
  -5   0   3 -0.7599 1.51965   8
   5   0  -3 3.85712 1.41582   8
  -4   0   3 -0.3328 1.32876   8
   4   0  -3 0.06542 1.20092   8
  -4   0   3 0.31434 1.69245   5
   3   0  -3 0.82198 1.25546   8
  -3   0   3 0.21297 1.27271   8
   2   0  -3 0.83727 1.12954   8
  -2   0   3 0.92649 1.14097   8
  -1   0   3 0.03467 0.96993   8
   1   0  -3 -1.1853 0.94368   8
   0   0   3 -0.1244 0.65282   5
   0   0  -3 0.09795 0.58360   5
  -1   0  -3 0.17518 1.12873   5
   1   0   3 0.44965 1.27091   5
  -2   0  -3 0.27808 1.28616  10
   2   0   3 1.07456 1.71759   5
  -2   0  -3 -0.0604 1.39069   5
  -3   0  -3 0.64427 1.16417   8
   3   0   3 0.61944 1.99242   5
  -3   0  -3 0.88404 1.57616  10
  -3   0  -3 0.35814 1.54484   5
  -4   0  -3 -1.9538 1.33735   8
   4   0   3 0.81724 2.16802   5
  -4   0  -3 -0.8725 1.69269   5
  -4   0  -3 2.47099 2.00094  10
  -4   0  -3 0.61266 1.77541   3
  -5   0  -3 0.49294 1.58722   8
  -5   0  -3 -0.4379 2.09712  10
  -5   0  -3 -0.3624 2.07297   3
  -6   0  -3 0.21936 2.70860  10
  -6   0  -3 -2.5346 1.68782   8
  -6   0  -3 3.09313 5.04546   3
  -7   0  -3 -1.1487 2.96457  10
  -7   0  -3 -2.2586 2.92694   3
  -7   0  -3 2.00368 1.96614   8
   8   0   3 -1.3471 4.11967   4
  -8   0  -3 2.62960 3.40046  10
  -8   0  -3 -1.2766 3.37509   3
  -9   0  -3 -3.4114 3.50740   3
 -10   0  -3 1.64715 4.01780   3
  11   0   3 -2.4915 2.38785   6
 -11   0  -3 4.07629 3.47171   3
  12   0   3 -0.7804 1.90206   6
  12  -1  -3 5.80428 2.69140   6
 -12  -1   3 4.09806 1.96210   9
  11  -1  -3 18.8079 3.76658   6
  11   1  -3 21.9921 3.42015   6
  11   1  -3 18.1312 3.97535   4
  10  -1  -3 -3.0509 3.27774   4
  10  -1  -3 3.90106 3.33189   6
  10   1  -3 1.99631 2.59476   6
  10   1  -3 2.69122 3.20391   4
 -10   1   3 4.88541 3.94204   3
   9  -1  -3 47.2718 6.03343   4
   9  -1  -3 47.5669 6.34067   6
   9   1  -3 45.0783 6.52867   4
  -9   1   3 49.3675 6.60510   3
   8  -1  -3 12.1821 3.35173   6
  -8  -1   3 10.3236 4.11620   3
   8  -1  -3 7.83459 3.47617   4
  -8   1   3 11.0712 3.87795   3
  -8   1   3 10.5357 2.88050   8
  -7  -1   3 31.2093 3.63401   8
   7  -1  -3 35.5363 4.73803   4
  -7  -1   3 28.9986 4.66023   3
  -7   1   3 33.6224 4.89765   3
  -7   1   3 38.4700 4.41660   8
  -6  -1   3 242.599 14.3160   3
  -6  -1   3 252.447 13.5750   8
   6  -1  -3 248.880 14.3633   4
  -6   1   3 252.716 14.1636   8
  -6   1   3 247.795 14.3385   3
  -5  -1   3 61.2387 5.21025   3
  -5  -1   3 57.8959 5.47132   5
   5  -1  -3 57.0835 4.74746   8
   5  -1  -3 60.4336 5.18501   4
  -5  -1   3 67.3149 4.61214   8
  -5   1   3 74.1064 5.30400   8
  -5   1   3 62.3135 6.20396   5
  -5   1   3 59.5038 5.02469   3
   5   1  -3 59.5586 4.25428   8
  -4  -1   3 57.8528 4.83402   5
   4  -1  -3 57.2470 4.45561   8
  -4  -1   3 62.2356 4.17559   8
  -4   1   3 57.4812 4.58674   8
   4   1  -3 60.1737 3.94451   8
  -4   1   3 53.5158 5.13937   5
  -3  -1   3 2282.71 113.876   5
  -3  -1   3 2433.43 113.567   8
   3  -1  -3 2334.60 113.906   8
   3   1  -3 2352.75 113.473   8
  -3   1   3 2337.56 114.097   8
   2   1  -3 9999.99 481.508   1
   1  -1  -3 34.9510 2.85869   8
  -1  -1   3 38.2426 1.81679   5
   1   1  -3 30.9828 2.57950   8
  -1   1   3 34.7822 2.90163   8
   0  -1  -3 164.896 8.87172   8
   0  -1  -3 169.841 8.86896   5
   0   1   3 180.346 8.97405   5
   0   1   3 177.202 8.91186   8
   0   1  -3 161.635 8.59693   5
  -1  -1  -3 2839.76 133.774   8
  -1  -1  -3 2851.69 134.120   5
   1   1   3 2805.17 134.217   5
  -1   1  -3 2604.04 134.049   5
  -2  -1  -3 1421.90 73.0358  10
  -2  -1  -3 1558.02 73.2800   5
   2   1   3 1591.38 73.5637   5
  -2   1  -3 1466.91 73.0939  10
  -2   1  -3 1449.78 73.3327   5
  -3  -1  -3 80.6340 5.71915  10
  -3  -1  -3 80.8315 5.94560   5
  -3  -1  -3 86.9663 4.91955   8
   3   1   3 78.8540 6.42798   5
  -3   1  -3 84.9824 5.50938   8
  -3   1  -3 78.5877 6.05934   5
  -3   1  -3 80.2069 5.64409  10
  -4  -1  -3 612.293 32.6276   5
  -4  -1  -3 667.960 31.4646   8
  -4  -1  -3 617.988 32.0699   3
  -4   1  -3 629.616 32.3155  10
   4   1   3 631.341 33.1637   5
  -4   1  -3 689.827 32.1244   8
  -4   1  -3 572.869 32.7641   5
  -5  -1  -3 1084.65 52.3809   8
  -5  -1  -3 1070.14 53.2692   3
  -5  -1  -3 1132.82 53.7885  10
  -5   1  -3 1116.59 53.1144   8
  -5   1  -3 1041.50 53.2671   3
  -5   1  -3 1085.40 53.5063  10
   5   1   3 897.139 57.3590   5
  -6  -1  -3 265.845 14.9180   8
  -6  -1  -3 294.401 16.7529  10
  -6   1  -3 270.213 15.6522   8
  -6   1  -3 279.095 16.4223  10
  -6   1  -3 286.460 16.2348   3
  -7  -1  -3 38.9968 5.65823   3
  -7  -1  -3 31.8756 5.32381  10
  -7  -1  -3 30.2668 4.16659   8
  -7   1  -3 33.8110 5.22735  10
  -7   1  -3 50.3916 6.36683   3
  -7   1  -3 40.3363 4.58934   8
  -8  -1  -3 7.15681 3.90762   3
  -8   1  -3 8.67659 4.06152   3
  -8   1  -3 5.25468 3.56142  10
  -9  -1  -3 22.0415 5.42134   3
  -9   1  -3 15.1817 4.70027   3
  10  -1   3 32.1881 5.27068   6
 -10  -1  -3 38.6492 6.07729   3
 -10   1  -3 38.9834 6.22311   3
  11  -1   3 4.10760 2.85118   6
 -11   1  -3 1.16981 3.34075   3
  11   1   3 5.26379 3.11312   6
 -12  -1  -3 5.01907 1.45929   9
  12  -1   3 4.11639 2.30853   6
  12   1   3 0.68632 1.68599   6
  12  -2  -3 3.20447 2.06616   6
 -12  -2   3 -2.4578 1.66430   9
  12   2  -3 2.03207 2.51142   4
  11  -2  -3 0.15967 2.59391   6
 -11  -2   3 1.15828 2.17115   9
  11   2  -3 4.38408 2.37069   6
  11   2  -3 3.75872 2.78435   4
  10  -2  -3 -3.0022 2.75994   6
  10   2  -3 0.70891 3.36356   4
 -10   2   3 1.58254 3.60723   3
   9  -2  -3 4.78107 3.11262   6
   9  -2  -3 4.55920 3.40374   4
  -9   2   3 4.95173 3.61858   3
   8  -2  -3 68.7141 6.80054   4
   8  -2  -3 81.9804 7.04518   6
  -8   2   3 83.0852 7.42035   3
  -7  -2   3 20.9294 2.76671   8
   7  -2  -3 19.7202 3.74822   4
   7  -2  -3 20.9043 3.91304   6
  -7   2   3 15.1114 3.08770   8
  -7   2   3 24.7986 4.24375   3
  -6  -2   3 80.7576 6.60724   3
   6  -2  -3 73.3813 6.35821   4
   6  -2  -3 76.6658 6.24892   6
  -6   2   3 74.5259 6.33146   8
  -6   2   3 85.5850 6.33608   3
  -5  -2   3 83.7208 6.23750   3
  -5  -2   3 84.3391 5.18198   8
   5  -2  -3 90.3957 6.47987   4
  -5  -2   3 83.8040 6.18833   5
   5  -2  -3 86.0903 6.12876   6
  -5   2   3 88.4987 6.40150   8
  -5   2   3 79.2599 5.94366   3
   4  -2  -3 1602.29 81.1606   8
  -4  -2   3 1708.56 81.1005   5
  -4  -2   3 1751.46 80.2926   8
   4   2  -3 1666.40 80.1341   8
  -4   2   3 1664.39 81.2033   8
   4   2  -3 1540.36 81.2169   5
  -3  -2   3 1388.28 65.0821   5
   3  -2  -3 1293.12 65.4050   8
   3   2  -3 1326.23 64.5571   8
  -3   2   3 1398.00 65.5335   8
   3   2  -3 1262.01 65.2431   5
  -2  -2   3 914.091 42.7755   5
   2  -2  -3 852.036 43.3335   8
  -2   2   3 905.189 43.4564   8
   2   2  -3 858.394 42.7451   8
   2   2  -3 863.948 42.9651   5
   1  -2  -3 1942.13 100.082   8
  -1   2   3 2129.83 100.207   8
   1   2  -3 2129.30 99.6178   5
   0  -2  -3 1782.14 90.5404   8
   0   2   3 1886.93 90.8219   5
   0   2   3 1949.34 90.6275   8
  -1  -2  -3 268.277 14.0106   5
  -1  -2  -3 261.902 13.4282   8
   1   2   3 273.263 14.1934   5
  -2  -2  -3 32.5478 3.34239   5
  -2  -2  -3 38.7029 2.42580   8
  -2  -2  -3 33.4253 3.41579  10
  -2   2  -3 27.2750 3.53753   5
   2   2   3 34.0533 3.84837   5
  -2   2  -3 38.2313 3.30194   8
  -3  -2  -3 285.003 14.0723   8
  -3  -2  -3 287.346 14.1776   8
  -3  -2  -3 290.788 15.4572   5
  -3  -2  -3 278.676 15.2806  10
  -3   2  -3 298.642 15.2536   8
  -3   2  -3 268.663 15.0958  10
   3   2   3 298.066 16.0255   5
  -3   2  -3 245.633 15.6297   5
  -4  -2  -3 3.89646 1.68994   3
  -4  -2  -3 1.95623 0.90464   8
  -4  -2  -3 0.80246 2.06320  10
  -4   2  -3 1.45885 1.79230  10
   4   2   3 1.06761 2.17659   5
  -4   2  -3 -1.8918 1.53005   8
  -5  -2  -3 199.592 11.6248   3
  -5  -2  -3 191.667 10.2237   8
  -5  -2  -3 198.696 12.0923  10
   5   2   3 179.110 12.5937   5
  -5   2  -3 192.570 11.7132   8
  -5   2  -3 198.485 11.7714   3
  -5   2  -3 197.293 11.7950  10
  -6  -2  -3 4.33837 3.18411  10
  -6   2  -3 2.30818 2.28324   8
  -6   2  -3 2.53778 2.69661  10
  -6   2  -3 0.73330 2.96996   3
   6   2   3 6.18798 3.09990   5
  -7  -2  -3 2.19877 3.19097  10
  -7  -2  -3 0.61974 2.94315   3
  -7   2  -3 2.71216 2.24894   8
  -7   2  -3 0.40867 3.41983   3
  -7   2  -3 1.75655 2.94687  10
   8  -2   3 33.1392 5.77337   6
  -8  -2  -3 32.9996 5.80171   3
  -8   2  -3 32.0930 4.94944  10
  -8   2  -3 36.5152 6.18018   3
   9  -2   3 16.9309 4.61500   6
  -9  -2  -3 13.7758 4.23837   3
  -9   2  -3 17.3305 4.76997   3
  10  -2   3 1.26724 3.54279   6
 -10   2  -3 3.49012 3.71302   3
  10   2   3 3.09955 3.04839   4
  11  -2   3 -0.1897 2.91953   6
 -11   2  -3 -1.6533 2.82200   3
 -12  -3   3 0.94290 1.61042   9
  12  -3  -3 6.51193 2.10003   6
  12   3  -3 -1.5949 2.20372   4
  11  -3  -3 21.7296 4.07692   6
 -11  -3   3 23.1413 3.13447   9
  11   3  -3 23.2379 4.52660   4
  10  -3  -3 131.236 10.1602   6
 -10  -3   3 146.943 9.00165   9
 -10   3   3 144.180 10.5856   3
  -9  -3   3 69.6997 6.15017   9
   9  -3  -3 74.3228 7.22835   6
  -9   3   3 79.3853 7.60047   3
   8  -3  -3 240.744 14.6203   6
   8  -3  -3 204.084 13.9377   4
  -8   3   3 266.838 14.7339   3
   7  -3  -3 291.375 17.3379   4
   7  -3  -3 320.173 17.7526   6
  -7   3   3 299.382 17.7502   8
  -7   3   3 320.536 17.5688   3
   6  -3  -3 37.6318 4.83555   4
  -6   3   3 34.2022 4.72518   8
  -6   3   3 43.8159 4.56175   3
   5  -3  -3 193.134 11.1261   4
   5  -3  -3 189.096 10.9286   6
  -5  -3   3 171.179 10.4064   5
   5   3  -3 167.870 10.9032   5
  -5   3   3 177.404 10.8581   8
  -5   3   3 168.787 10.2601   3
  -4  -3   3 983.923 47.8629   5
  -4  -3   3 924.981 47.2353   9
   4  -3  -3 948.122 48.2396   6
   4   3  -3 948.837 48.3215   5
  -4   3   3 1026.83 48.5190   8
  -3  -3   3 2027.29 104.125   9
  -3  -3   3 2216.81 104.452   5
   3  -3  -3 2140.88 105.571   6
   3  -3  -3 2141.38 105.423   8
   3   3  -3 2146.05 103.725   8
  -3   3   3 2255.27 105.208   8
   3   3  -3 2157.88 104.868   5
  -2  -3   3 151.682 8.03445   5
   2  -3  -3 147.351 8.66698   8
   2   3  -3 157.914 8.41502   5
  -2   3   3 155.930 8.86191   8
   2   3  -3 142.836 7.84980   8
   1  -3  -3 78.0405 5.44342   8
   1   3  -3 96.7634 5.18207   5
  -1   3   3 92.3037 5.77184   5
  -1   3   3 90.3916 5.75253   8
   0  -3  -3 2028.87 103.230   8
   0   3   3 2197.86 103.370   8
   0   3   3 2179.23 103.758   5
  -1  -3  -3 130.771 7.00195   8
  -1  -3  -3 129.635 7.81664   5
   1   3   3 132.228 7.04657   8
   1   3   3 135.729 8.13217   5
  -1   3  -3 141.134 7.87717   8
  -2  -3  -3 14.6557 2.13767  10
  -2  -3  -3 8.43128 1.94616   5
  -2  -3  -3 12.8055 0.98472   8
  -2   3  -3 9.67934 2.11875   8
   2   3   3 10.7558 2.45801   5
  -3  -3  -3 13.0679 2.46590  10
  -3  -3  -3 14.9964 2.61640   5
  -3   3  -3 12.1437 2.34674  10
  -3   3  -3 10.8101 2.50024   8
   3   3   3 9.03285 2.68761   5
  -3   3  -3 9.49873 2.51406   5
   4  -3   3 391.650 21.0429   2
  -4  -3  -3 389.226 21.5521   3
  -4  -3  -3 432.015 22.2632  10
   4  -3   3 437.119 22.4009   6
  -4   3  -3 425.484 22.9408   8
  -4   3  -3 416.597 21.9570  10
   4   3   3 424.342 23.0141   5
  -5  -3  -3 268.219 15.1872  10
   5  -3   3 269.968 15.8376   6
  -5  -3  -3 252.082 14.4307   3
   5   3   3 243.800 15.7087   5
  -5   3  -3 255.632 14.9478   8
  -5   3  -3 250.520 14.6178  10
  -6  -3  -3 121.617 8.71690   3
   6  -3   3 119.805 9.20433   6
   6   3   3 121.744 10.5091   5
  -6   3  -3 130.570 9.20643   3
  -6   3  -3 120.695 8.70665  10
  -6   3  -3 131.793 11.0071   8
  -7  -3  -3 8.41879 3.75597   3
   7  -3   3 5.82514 3.64478   6
  -7   3  -3 5.71564 3.00104  10
  -7   3  -3 7.18410 3.63896   3
  -8  -3  -3 34.0420 5.54063   3
   8  -3   3 31.0954 5.40899   6
  -8   3  -3 38.8262 5.24715  10
  -8   3  -3 34.8435 5.65658   3
   9  -3   3 11.2652 4.12109   6
  -9   3  -3 15.3702 4.84343   3
  10  -3   3 75.8038 9.17970   6
 -10  -3  -3 68.5759 6.79987   9
 -10   3  -3 63.3802 8.57557   3
 -11  -3  -3 12.2548 2.44373   9
  11  -3   3 10.3968 3.32396   6
 -11   3  -3 12.1516 3.28839   3
  12  -4  -3 12.9283 2.37140   6
 -12  -4   3 10.7733 2.05028   9
  12   4  -3 9.76926 2.67282   4
 -11  -4   3 1.47457 2.11529   9
  11  -4  -3 3.62800 2.75714   6
  11   4  -3 1.40985 3.10671   4
 -10  -4   3 8.60763 2.86994   9
  10  -4  -3 6.52776 3.29567   6
 -10   4   3 12.6204 3.74236   3
   9  -4  -3 25.3739 4.83541   6
  -9  -4   3 18.4869 3.29167   9
  -9   4   3 17.0502 4.02625   3
   8  -4  -3 88.4406 7.82091   6
  -8  -4   3 79.4031 6.14809   9
  -8   4   3 63.7844 8.74226   3
  -7  -4   3 46.5491 4.76440   9
   7  -4  -3 44.9523 5.81963   6
  -7   4   3 44.5110 5.17623   3
  -6  -4   3 7.62579 2.22568   9
   6  -4  -3 13.5922 3.43266   6
   6   4  -3 4.99721 2.17361   5
  -6   4   3 4.96524 3.59704   8
   5  -4  -3 34.0265 4.62425   6
  -5  -4   3 38.6054 3.78433   9
  -5   4   3 30.7830 3.51366   3
   5   4  -3 33.1137 4.16569   5
  -5   4   3 34.4821 4.26537   8
  -4  -4   3 626.667 31.0046   9
   4  -4  -3 646.195 31.5059   2
  -4  -4   3 604.939 31.3895   5
   4  -4  -3 600.799 32.2110   6
  -4   4   3 647.415 32.3599   8
   4   4  -3 621.740 32.1127   5
  -3  -4   3 139.384 7.86879   5
   3  -4  -3 141.079 8.25651   2
   3  -4  -3 134.752 8.89461   6
  -3  -4   3 131.864 7.66235   9
  -3   4   3 144.192 8.78537   8
   3   4  -3 140.576 8.46373   5
   2  -4  -3 185.730 11.5161   2
   2   4  -3 197.216 10.4372   8
  -2   4   3 217.973 11.7458   8
   2   4  -3 205.796 10.4261   8
   2   4  -3 214.508 11.2714   5
  -1  -4   3 29.7389 2.55855   9
   1  -4  -3 32.6145 3.26709   2
  -1  -4   3 37.7813 2.97824   2
   1  -4  -3 32.5782 2.94459   8
   1  -4  -3 26.5499 3.59110   6
   1   4  -3 38.8385 2.99572   5
  -1   4   3 32.2651 3.35998   8
   1   4  -3 32.3218 2.72802   8
  -1   4   3 35.6834 3.68807   5
   0  -4  -3 11.2117 1.98137   2
   0  -4   3 8.96719 1.41650   9
   0  -4   3 8.86472 1.84973   2
   0  -4  -3 6.87860 2.25040   6
   0  -4  -3 8.26762 1.44420   8
   0   4  -3 10.2828 1.72271   8
   0   4   3 6.45119 1.94095   5
   0   4  -3 7.90627 1.50940   5
   0   4   3 9.78932 1.69995   8
   1  -4   3 453.074 25.0619   6
   1  -4   3 487.512 24.1828   9
  -1  -4  -3 502.380 24.7314   2
  -1  -4  -3 473.781 23.9952   8
  -1  -4  -3 473.794 25.1860   6
   1  -4   3 477.958 24.6416   2
   1   4   3 512.897 25.3779   5
   1   4   3 487.673 24.0784   8
  -1   4  -3 522.000 25.0685   8
   2  -4   3 23.9722 3.40496   6
  -2  -4  -3 24.9911 2.09275   9
  -2  -4  -3 21.1686 2.99383   6
   2  -4   3 22.5206 2.21595   9
   2  -4   3 22.4618 2.65716   2
   2   4   3 15.8662 2.95439   5
  -2   4  -3 25.7956 3.37274   8
  -3  -4  -3 32.4046 2.69817   9
   3  -4   3 31.3529 4.19378   6
   3  -4   3 34.5243 2.93635   9
   3  -4   3 32.8513 3.33265   2
  -3  -4  -3 32.0542 3.71429   6
  -3   4  -3 32.8216 3.42860  10
   3   4   3 32.5180 4.46666   5
  -3   4  -3 30.3505 4.02923   8
  -4  -4  -3 -0.3554 1.31956   9
   4  -4   3 0.68108 1.62435   2
   4  -4   3 0.82537 2.55285   6
  -4   4  -3 1.63369 2.06784   8
  -4   4  -3 2.38726 1.73756  10
   4   4   3 -0.8680 2.07291   5
  -5  -4  -3 3.49949 1.74070   9
   5  -4   3 4.62785 3.00383   6
   5  -4   3 4.37220 1.85247   2
  -5   4  -3 5.35830 2.60582   8
   5   4   3 8.25225 2.93137   5
  -5   4  -3 1.44152 1.85972  10
   6  -4   3 -2.1163 2.78162   6
   6  -4   3 0.92242 1.74374   2
   6   4   3 1.32386 2.95842   5
  -6   4  -3 2.75452 2.22013  10
  -6   4  -3 -2.5671 2.82312   3
   7  -4   3 48.3933 7.75354   6
  -7  -4  -3 53.6308 4.98975   9
  -7   4  -3 43.5913 5.16943  10
  -7   4  -3 48.7481 6.43732   3
   8  -4   3 181.016 12.7571   6
  -8  -4  -3 185.855 10.6869   9
  -8   4  -3 175.770 12.3533   3
  -8   4  -3 170.191 11.3462  10
   9  -4   3 -0.3778 3.43207   6
  -9  -4  -3 1.00743 2.27013   9
  -9   4  -3 2.48021 3.30375   3
  10  -4   3 6.86504 3.65454   6
 -10  -4  -3 2.72647 2.23014   9
 -10   4  -3 7.58784 3.42454   3
  11  -4   3 -1.0215 2.29850   6
 -11  -4  -3 5.72571 1.73210   9
  11   4   3 -4.1897 3.48784   4
 -11   4  -3 5.73588 2.69783   3
 -11  -5   3 1.25965 1.94719   9
  11  -5  -3 4.07848 2.30318   6
  11   5  -3 1.74324 2.77725   4
  10  -5  -3 0.78252 2.95535   6
 -10  -5   3 8.80851 2.78793   9
   9  -5  -3 60.9696 6.81376   6
  -9  -5   3 57.4737 5.32038   9
  -9   5   3 44.0022 5.63588   3
  -8  -5   3 1.80729 2.49667   9
   8  -5  -3 -3.9333 3.03275   6
  -8   5   3 1.38252 2.59189   3
  -7  -5   3 18.8060 4.51117   9
   7  -5  -3 13.2464 4.07908   6
  -7   5   3 20.0252 3.57862   3
  -6  -5   3 1.75649 2.26851   9
   6  -5  -3 1.63952 3.09702   6
   6   5  -3 7.81360 2.72833   5
  -6   5   3 2.18215 2.17864   3
  -5  -5   3 53.2256 4.62010   9
   5  -5  -3 57.2023 6.05960   6
  -5   5   3 63.4417 4.83263   3
   5   5  -3 52.3218 5.18153   5
   4  -5  -3 80.1055 5.69659   2
  -4  -5   3 66.9624 4.96374   9
   4  -5  -3 75.5183 6.53891   6
  -4  -5   3 73.4909 4.79275   2
   4   5  -3 75.3749 5.94231   5
  -4   5   3 64.6758 6.10591   8
  -4   5   3 67.7240 5.10761   3
   3  -5  -3 88.3737 6.68311   6
  -3  -5   3 72.9835 5.45210   6
   3  -5  -3 82.0287 5.82524   2
  -3  -5   3 82.1894 5.15997   9
  -3  -5   3 77.6893 5.26955   2
   3   5  -3 76.6593 5.90679   5
  -3   5   3 84.4063 6.29499   8
   2  -5  -3 592.199 29.0938   2
   2  -5  -3 564.380 28.0182   9
   2  -5  -3 572.663 29.7599   6
  -2  -5   3 562.058 28.2866   9
  -2  -5   3 568.626 28.6648   2
  -2  -5   3 532.170 29.0577   6
   2   5  -3 525.140 27.8593   8
   2   5  -3 584.446 29.0068   5
   2   5  -3 590.353 27.9336   8
  -2   5   3 590.356 29.3737   8
  -2   5   3 579.979 31.9482   5
   1  -5  -3 246.065 14.3268   6
   1  -5  -3 249.803 13.8152   2
  -1  -5   3 244.450 13.0105   9
  -1  -5   3 235.891 13.4629   2
   1  -5  -3 245.215 12.7745   9
  -1   5   3 270.498 14.2763   5
   1   5  -3 259.092 13.5672   5
  -1   5   3 257.544 13.7884   8
   1   5  -3 253.710 13.2926   8
   0  -5   3 10.7982 2.28419   2
   0  -5   3 14.2348 1.84737   9
   0  -5  -3 10.8062 2.40035   2
   0  -5  -3 11.0252 1.38617   9
   0  -5   3 14.1602 2.48893   6
   0  -5  -3 12.7231 2.80016   6
   0   5   3 11.6747 2.62759   5
   0   5  -3 11.5645 2.05709   8
   0   5  -3 9.04655 1.73504   5
   0   5   3 12.1719 1.96225   8
   1  -5   3 253.519 13.0552   9
  -1  -5  -3 265.992 13.1657   9
   1  -5   3 244.740 13.6178   2
  -1  -5  -3 258.546 13.7299   2
   1  -5   3 240.195 14.1585   6
  -1  -5  -3 241.704 14.2342   6
   1   5   3 240.043 14.2522   5
  -1   5  -3 265.531 13.9622   8
   1   5   3 243.164 12.7708   8
  -1   5  -3 263.419 13.6522   5
  -2  -5  -3 1178.65 57.9409   9
   2  -5   3 1212.32 58.6989   2
  -2  -5  -3 1159.94 59.2249   6
   2  -5   3 1224.34 58.0795   9
   2  -5   3 1168.76 59.4156   6
  -2   5  -3 1176.87 59.7970   8
   2   5   3 1209.22 59.7030   5
  -3  -5  -3 1763.49 84.1159   6
  -3  -5  -3 1683.05 82.7713   9
   3  -5   3 1750.13 84.4678   6
   3  -5   3 1711.51 82.8605   9
   3  -5   3 1707.76 83.4160   2
  -3   5  -3 1722.58 84.2782   8
   3   5   3 1677.60 84.7180   5
  -3   5  -3 1628.90 83.3871  10
  -4  -5  -3 447.964 22.1545   9
   4  -5   3 461.498 24.0871   6
   4  -5   3 447.327 22.7844   2
  -4   5  -3 420.456 22.7372  10
  -4   5  -3 435.897 23.7861   8
   4   5   3 410.946 24.2675   5
   5  -5   3 34.3862 3.83029   2
   5  -5   3 35.6449 5.33963   6
  -5  -5  -3 37.6746 3.66147   9
  -5   5  -3 26.8524 3.77113  10
  -5   5  -3 32.0449 4.49867   3
   5   5   3 21.0143 4.45000   5
  -5   5  -3 40.5293 6.47951   8
  -6  -5  -3 8.23898 2.58786   9
   6  -5   3 5.01011 2.15847   2
   6  -5   3 3.81585 3.51350   6
  -6   5  -3 12.2121 2.72453  10
  -6   5  -3 12.5099 3.56763   3
   7  -5   3 55.8636 6.94628   6
  -7  -5  -3 58.5640 5.07550   9
   7  -5   3 42.3311 5.40792   2
  -7   5  -3 46.7349 6.09285   3
  -7   5  -3 50.2373 4.92555  10
   8  -5   3 46.9272 6.44831   6
  -8  -5  -3 57.4479 5.13811   9
  -8   5  -3 60.3726 6.69883   3
   9  -5   3 15.7348 5.60855   6
  -9   5  -3 20.1212 5.75986   3
 -10  -5  -3 4.63742 1.93226   9
  10  -5   3 6.92820 3.23480   6
 -10   5  -3 9.35124 3.12701   3
  11  -6  -3 0.36805 1.95820   6
 -11  -6   3 1.69471 1.36263   9
  11   6  -3 5.89527 2.69658   4
  10  -6  -3 2.40391 2.76237   6
 -10  -6   3 0.29468 1.95745   9
  -9  -6   3 4.70725 3.25982   9
   8  -6  -3 6.01626 3.45751   6
  -8  -6   3 5.25939 2.73050   9
  -8   6   3 7.13791 2.59324   3
   7  -6  -3 1.51728 3.36381   6
  -7  -6   3 0.98702 2.50005   9
  -6  -6   3 4.27189 3.56264   9
   6  -6  -3 0.66237 3.21140   6
  -6   6   3 1.43640 2.19318   3
   5  -6  -3 -1.6144 2.59537   6
  -5  -6   3 2.25569 2.00740   9
   5   6  -3 0.83153 2.18848   5
  -4  -6   3 5.68216 2.11365   9
   4  -6  -3 6.23333 2.70186   2
  -4  -6   3 5.96904 1.98704   6
  -4  -6   3 2.75600 1.60738   2
   4  -6  -3 1.27690 2.85499   6
  -4   6   3 0.48957 2.33631   8
  -4   6   3 5.08243 2.20630   5
   4   6  -3 4.40463 2.29295   5
   3  -6  -3 46.4095 5.69156   6
  -3  -6   3 48.1676 4.31218   6
   3  -6  -3 43.0627 3.32996   9
  -3  -6   3 44.2159 4.04105   2
   3  -6  -3 48.8047 4.72486   2
  -3  -6   3 45.4194 3.90102   9
   3   6  -3 43.4958 4.57271   5
  -3   6   3 42.1507 4.73012   5
  -3   6   3 36.2967 4.54693   8
  -2  -6   3 18.6521 2.89695   2
  -2  -6   3 22.5388 2.64252   9
   2  -6  -3 19.1129 3.19779   2
   2  -6  -3 27.6681 4.32601   6
   2  -6  -3 15.8236 1.90622   9
  -2  -6   3 19.5856 3.05892   6
  -2   6   3 17.2240 3.06934   5
   2   6  -3 16.4044 1.27623   8
   2   6  -3 17.4274 2.80477   5
   2   6  -3 17.1840 1.25307   8
  -2   6   3 15.7218 2.62949   8
   1  -6  -3 0.56575 2.24276   6
   1  -6  -3 2.79342 2.05851   2
  -1  -6   3 5.31472 1.97555   6
  -1  -6   3 0.35563 1.89271   2
   1  -6  -3 2.36004 1.11333   9
  -1  -6   3 2.45161 2.60472   9
  -1   6   3 -0.7305 1.35729   8
  -1   6   3 0.79300 1.70028   5
   1   6  -3 0.78110 1.45929   5
   1   6  -3 0.79619 1.14111   8
   0  -6  -3 3.77920 1.16822   9
   0  -6   3 1.81180 2.40478   2
   0  -6   3 3.13958 2.08427   6
   0  -6  -3 6.87424 3.10040   6
   0   6  -3 3.86954 1.52949   8
   0   6   3 3.28538 1.36989   8
   0   6   3 2.61575 2.11394   5
   0   6  -3 4.67444 1.63769   5
  -1  -6  -3 209.400 11.5932   2
  -1  -6  -3 198.489 12.1223   6
   1  -6   3 191.022 12.0981   6
  -1  -6  -3 200.333 10.4543   9
   1  -6   3 200.255 10.6581   9
   1  -6   3 199.338 11.4901   2
   1   6   3 188.794 12.1161   5
  -1   6  -3 201.809 11.3575   5
  -1   6  -3 191.143 11.8999   8
  -2  -6  -3 5.62252 1.54382   9
   2  -6   3 10.6191 2.95823   6
   2  -6   3 6.59058 2.49414   2
   2  -6   3 6.06405 1.88001   9
  -2  -6  -3 10.6311 2.91325   6
  -2   6  -3 7.53484 1.93577   5
   2   6   3 6.50103 2.45710   5
  -2   6  -3 12.6236 2.04267  10
  -2   6  -3 3.67118 1.94626   8
   3  -6   3 5.33048 3.09595   6
  -3  -6  -3 6.10680 2.77094   6
   3  -6   3 3.48061 2.38684   2
  -3  -6  -3 4.34372 1.64093   9
   3  -6   3 4.48793 1.84521   9
  -3   6  -3 7.68810 1.92420  10
  -3   6  -3 3.33699 2.24959   8
   3   6   3 0.98433 2.20912   5
   4  -6   3 205.704 12.6067   6
   4  -6   3 195.617 11.1695   2
  -4  -6  -3 196.724 10.2306   9
   4   6   3 159.073 12.0413   5
  -4   6  -3 168.659 10.3553  10
   5  -6   3 220.977 14.3863   6
  -5  -6  -3 214.680 12.0125   9
   5  -6   3 223.748 12.6854   2
  -5   6  -3 213.220 13.0129   3
   6  -6   3 2.32607 3.54030   6
  -6  -6  -3 0.57241 2.07357   9
  -6   6  -3 6.67693 3.13821   3
  -7  -6  -3 26.2233 3.45932   9
   7  -6   3 23.9130 5.04366   6
   7  -6   3 30.4094 3.37408   2
  -7   6  -3 32.2759 4.94697   3
   8  -6   3 8.64111 3.85120   6
  -8  -6  -3 10.2683 2.56102   9
  -8   6  -3 16.5182 3.71014   3
  -9  -6  -3 0.57751 1.93193   9
   9  -6   3 2.79342 3.13872   6
  -9   6  -3 -0.5607 2.37558   3
 -10  -6  -3 0.70669 2.02940   9
  10  -6   3 2.23182 2.96112   6
 -10   6  -3 1.89072 1.93318   3
  10  -7  -3 4.66821 2.51931   6
 -10  -7   3 8.59910 2.18636   9
   9  -7  -3 6.81709 2.95726   6
  -9  -7   3 7.17266 2.26659   9
  -8  -7   3 27.3747 3.65748   9
   8  -7  -3 31.9453 5.06766   6
  -7  -7   3 52.9210 5.30808   9
   7  -7  -3 55.5616 6.96739   6
   6  -7  -3 65.7814 7.62507   6
  -6  -7   3 61.6568 5.38096   9
  -5  -7   3 443.259 22.9245   9
   5  -7  -3 445.970 25.0257   6
  -4  -7   3 258.072 13.1374   9
   4  -7  -3 244.224 15.1422   6
  -4  -7   3 213.062 12.9755   2
  -3  -7   3 40.6437 4.65293   6
   3  -7  -3 44.8931 5.15671   2
  -3  -7   3 47.6302 4.60841   2
  -3  -7   3 48.4748 4.25613   9
   3  -7  -3 49.9908 6.19045   6
   3   7  -3 40.5818 4.99158   5
  -3   7   3 44.6819 5.21701   8
  -2  -7   3 21.4577 3.26908   2
  -2  -7   3 18.5110 2.63689   9
   2  -7  -3 23.4289 2.45892   9
   2  -7  -3 20.2041 3.56060   2
   2  -7  -3 23.4636 4.40191   6
  -2  -7   3 20.0065 3.43146   6
  -2   7   3 14.5529 2.80325   8
  -2   7   3 25.7064 3.79145   5
   2   7  -3 15.7902 2.77601   5
   1  -7  -3 933.585 44.7618   9
   1  -7  -3 969.006 46.1361   2
   1  -7  -3 936.085 46.9910   6
  -1  -7   3 951.329 45.0933   9
  -1  -7   3 936.103 45.8834   2
  -1  -7   3 901.827 46.3045   6
  -1   7   3 845.636 46.4650   5
   1   7  -3 866.857 45.9177   5
  -1   7   3 880.944 45.7488   8
   0  -7   3 235.005 12.9262   2
   0  -7  -3 218.343 11.5059   9
   0  -7  -3 219.187 13.6288   6
   0  -7   3 227.240 11.8498   9
   0  -7   3 212.618 13.1753   6
   0  -7  -3 231.804 12.9785   2
   0   7   3 194.827 11.7486   8
   0   7  -3 217.146 12.5620   5
   0   7  -3 224.768 12.4762   8
   0   7   3 207.248 13.2515   5
  -1  -7  -3 68.4253 4.42494   9
   1  -7   3 73.9151 4.94497   9
   1  -7   3 69.1833 6.02414   2
   1  -7   3 63.3497 6.25728   6
  -1  -7  -3 65.6215 6.46722   6
   1   7   3 54.9511 5.87877   5
  -1   7  -3 64.2287 5.42320   8
  -1   7  -3 66.0281 5.34893   5
   2  -7   3 47.4475 5.94175   6
   2  -7   3 40.4957 4.78417   2
  -2  -7  -3 42.5071 3.61534   9
  -2  -7  -3 39.7638 5.32045   6
   2  -7   3 44.1344 3.98577   9
   2   7   3 44.2405 5.36809   5
  -2   7  -3 44.9559 4.47906   5
  -2   7  -3 43.7099 5.05257   8
  -3  -7  -3 131.793 7.59130   9
  -3  -7  -3 117.593 9.01403   6
   3  -7   3 124.732 7.73608   9
   3  -7   3 128.290 8.95540   2
   3  -7   3 140.403 10.2594   6
   4  -7   3 86.8655 12.1965   6
  -4  -7  -3 74.8212 5.39759   9
   4  -7   3 77.6928 6.50102   2
  -4   7  -3 78.6220 5.97320   3
  -5  -7  -3 1.61415 2.03021   9
   5  -7   3 1.96584 3.53028   6
   5  -7   3 3.75172 2.46905   2
   6  -7   3 99.7316 7.19625   2
  -6  -7  -3 99.0566 6.57834   9
   6  -7   3 103.162 9.31315   6
  -6   7  -3 95.3010 7.38978   3
  -7  -7  -3 73.8661 5.17983   9
   7  -7   3 68.5381 7.55786   6
  -7   7  -3 52.6512 5.92225   3
   8  -7   3 53.8016 6.52494   6
  -8  -7  -3 35.9058 3.90684   9
  -8   7  -3 40.3182 4.82037   3
   9  -7   3 32.7407 4.44792   6
  -9  -7  -3 32.2802 3.13122   9
  -9   7  -3 33.0412 3.77871   3
  -9  -8   3 20.1164 2.66081   9
   9  -8  -3 15.8745 3.16322   6
  -8  -8   3 0.93431 2.00886   9
   8  -8  -3 2.10206 2.99463   6
  -7  -8   3 2.13650 3.23905   9
   7  -8  -3 0.28450 4.38499   6
  -6  -8   3 3.34762 2.27326   9
   6  -8  -3 -0.9924 3.53148   6
  -5  -8   3 4.55842 2.42412   9
   5  -8  -3 4.12155 3.70252   6
  -4  -8   3 6.43966 2.41010   9
  -4  -8   3 8.88654 2.29779   2
   4  -8  -3 5.82887 3.72641   6
  -3  -8   3 39.7957 4.26449   9
  -3  -8   3 19.2019 5.06407   2
   3  -8  -3 40.9486 6.04223   6
  -3  -8   3 33.1942 4.33522   6
   2  -8  -3 57.8026 7.02176   6
  -2  -8   3 36.7997 4.64008   2
   2  -8  -3 45.3830 3.54229   9
  -2  -8   3 38.5609 5.07319   6
  -1  -8   3 26.4092 3.26972   9
   1  -8  -3 30.3840 5.13143   6
  -1  -8   3 33.4540 4.42392   2
   1  -8  -3 34.1621 3.06865   9
  -1  -8   3 33.6480 4.85129   6
   0  -8   3 7.42685 2.12183   9
   0  -8   3 6.64986 2.87844   2
   0  -8   3 6.75021 3.32724   6
   0  -8  -3 2.42915 3.20361   6
   0  -8  -3 5.79955 1.71081   9
  -1  -8  -3 134.843 7.53532   9
   1  -8   3 127.048 9.71398   6
  -1  -8  -3 120.559 11.9338   6
   1  -8   3 130.862 8.02399   9
   2  -8   3 106.838 9.86125   6
  -2  -8  -3 102.077 8.57958   6
   2  -8   3 118.844 7.20408   9
   2  -8   3 124.254 8.52214   2
  -2  -8  -3 108.834 6.68807   9
   3  -8   3 16.8428 4.37040   6
  -3  -8  -3 11.2264 3.41057   6
   3  -8   3 17.3610 3.79959   2
  -3  -8  -3 14.4985 2.35493   9
   4  -8   3 7.45062 4.19773   6
  -4  -8  -3 8.55773 2.28301   9
   4  -8   3 7.47401 3.12094   2
   5  -8   3 13.6188 4.50972   6
  -5  -8  -3 21.4158 2.84084   9
   5  -8   3 16.8785 3.27561   2
   6  -8   3 7.68296 4.04388   6
   6  -8   3 3.61804 2.50319   2
  -6  -8  -3 6.22588 2.03191   9
   7  -8   3 8.44270 4.03318   6
  -7  -8  -3 4.71362 1.91746   9
  -8  -8  -3 6.85022 1.96314   9
   8  -8   3 13.0962 3.44497   6
  -8  -9   3 18.6746 3.66484   9
   8  -9  -3 17.2665 3.37437   6
  -7  -9   3 19.5501 2.65749   9
   7  -9  -3 16.5449 3.72797   6
  -6  -9   3 22.0581 3.24634   9
   6  -9  -3 17.0499 4.11913   6
  -5  -9   3 86.3474 6.21511   9
   5  -9  -3 82.2226 8.21282   6
   4  -9  -3 53.9724 7.00095   6
  -4  -9   3 63.6136 5.13283   9
  -3  -9   3 50.8470 5.16893   2
   3  -9  -3 65.1589 7.11693   6
  -3  -9   3 52.2741 5.25418   6
  -3  -9   3 61.3050 4.90651   9
  -2  -9   3 6.24457 2.32832   9
  -2  -9   3 1.83889 2.34044   6
   2  -9  -3 4.07513 3.33119   6
  -2  -9   3 6.02401 2.67068   2
   1  -9  -3 33.9438 3.19107   9
   1  -9  -3 33.3784 5.59218   6
  -1  -9   3 38.2488 3.85007   9
  -1  -9   3 29.8317 4.20822   2
  -1  -9   3 36.4809 5.03838   6
   0  -9  -3 32.7968 3.16895   9
   0  -9   3 32.5476 3.51112   9
   0  -9   3 34.8819 4.79355   2
   0  -9  -3 35.4869 5.26391   6
   0  -9   3 28.6686 4.70710   6
   1  -9   3 7.73692 2.45579   9
   1  -9   3 12.1197 3.96640   6
  -1  -9  -3 4.68879 1.64098   9
  -1  -9  -3 8.57131 3.56841   6
   1  -9   3 5.65615 2.92218   2
  -2  -9  -3 28.7664 4.66877   6
   2  -9   3 33.7541 5.19632   6
  -2  -9  -3 32.2997 3.27323   9
   2  -9   3 33.2155 3.45635   9
   2  -9   3 30.5813 4.48596   2
  -3  -9  -3 80.0846 7.21825   6
  -3  -9  -3 81.2050 5.32520   9
   3  -9   3 86.1534 7.25772   2
   3  -9   3 84.1664 7.99706   6
   4  -9   3 30.3149 4.23961   2
  -4  -9  -3 32.2562 3.18385   9
   4  -9   3 29.5437 4.90815   6
   5  -9   3 9.01004 3.74114   6
   5  -9   3 12.0702 2.72312   2
  -5  -9  -3 7.39064 1.84178   9
   6  -9   3 1.32087 2.93600   6
  -6  -9  -3 2.46428 1.61988   9
  -7  -9  -3 8.04396 1.52007   9
   7  -9   3 7.12920 3.10775   6
   6 -10  -3 5.73080 2.81072   6
  -6 -10   3 6.20549 1.74846   9
   5 -10  -3 2.58930 2.62310   6
  -5 -10   3 1.16166 1.83289   9
  -4 -10   3 26.8354 3.07900   9
   4 -10  -3 21.0361 4.16222   6
   3 -10  -3 6.00830 3.24192   6
  -3 -10   3 4.57617 1.92888   9
  -2 -10   3 16.6625 3.11173   9
   2 -10  -3 11.1394 3.68079   6
  -2 -10   3 11.2248 3.05817   6
   1 -10  -3 1.88993 3.21802   6
  -1 -10   3 -1.5447 1.83360   9
  -1 -10   3 0.55382 2.35200   2
  -1 -10   3 1.41905 2.38043   6
   0 -10  -3 3.24129 3.06656   6
   0 -10   3 6.09918 3.03003   6
   0 -10   3 9.45580 2.11153   9
   0 -10   3 4.23174 2.94025   2
   1 -10   3 9.08604 3.10476   2
   1 -10   3 13.8076 2.58529   9
   1 -10   3 17.7165 4.30765   6
  -1 -10  -3 15.3864 1.94581   9
  -1 -10  -3 14.7236 3.63657   6
   2 -10   3 14.0861 3.79758   6
  -2 -10  -3 9.92913 3.52799   6
  -2 -10  -3 12.5010 1.81023   9
  -3 -10  -3 7.22134 1.48155   9
   3 -10   3 6.15313 3.03794   6
   3 -10   3 3.81661 2.54482   2
   4 -10   3 -6.3685 2.33323   6
  -4 -10  -3 1.65507 1.27613   9
   5 -10   3 0.89342 2.51108   6
  -5 -10  -3 0.91782 1.20038   9
   6 -10   3 1.27726 2.34098   6
  -6 -10  -3 1.23806 1.38325   9
   4 -11  -3 3.67436 2.75092   6
  -4 -11   3 8.29483 1.68435   9
  -3 -11   3 17.8507 2.19122   9
   3 -11  -3 18.8259 3.31533   6
   2 -11  -3 91.8031 7.22272   6
  -2 -11   3 85.4740 5.45589   9
  -1 -11   3 13.0359 2.44677   6
   1 -11  -3 14.9792 3.41076   6
  -1 -11   3 16.0135 2.18454   9
   0 -11  -3 31.9158 4.36021   6
   0 -11   3 23.5468 3.31016   6
   0 -11   3 24.9573 2.75815   9
  -1 -11  -3 62.1835 5.54995   6
   1 -11   3 58.6110 5.24560   6
   2 -11   3 72.4177 5.86245   6
   3 -11   3 69.3887 6.56856   6
   4 -11   3 70.9073 5.51929   6
 -12   0   4 3.50254 1.98688   9
  11   0  -4 28.5471 4.25870   6
  11   0  -4 32.5695 4.40110   4
  10   0  -4 0.20964 2.63459   6
  10   0  -4 -1.1260 3.01866   4
  -9   0   4 9.37321 4.28848   3
   9   0  -4 10.0783 3.14570   6
   9   0  -4 6.03013 3.80798   4
  -8   0   4 26.9539 4.96754   3
   8   0  -4 21.3182 4.67073   4
  -8   0   4 20.3708 3.21803   8
  -7   0   4 89.4999 6.92762   8
  -7   0   4 103.324 7.80182   3
  -6   0   4 103.155 7.46154   3
  -6   0   4 107.000 7.12464   8
  -5   0   4 1410.70 67.0221   8
   5   0  -4 1382.99 66.9212   8
  -5   0   4 1369.74 67.2469   3
  -5   0   4 1282.85 67.7839   5
  -4   0   4 174.065 9.92663   8
  -4   0   4 144.510 10.2407   5
   4   0  -4 208.411 10.0430   8
  -3   0   4 1197.62 55.5816   8
  -3   0   4 1026.05 55.6762   5
   3   0  -4 1174.02 55.5075   8
   2   0  -4 5284.30 255.532   1
   0   0  -4 3183.74 154.283   1
   1   0   4 2566.83 124.669   5
  -1   0  -4 2583.08 124.513   5
  -2   0  -4 635.088 31.5080   5
  -2   0  -4 632.238 31.4305  10
   2   0   4 607.863 31.7035   5
  -3   0  -4 1421.00 69.5498  10
   3   0   4 1409.42 70.0917   5
  -3   0  -4 1407.59 69.7564   5
  -4   0  -4 71.3254 5.90725  10
  -4   0  -4 72.9572 5.09620   8
   4   0   4 63.6544 6.40730   5
  -5   0  -4 202.000 11.9677  10
  -5   0  -4 182.745 10.9378   8
  -5   0  -4 188.317 11.5722   3
  -6   0  -4 157.757 10.1283   8
  -6   0  -4 167.482 11.3502  10
  -6   0  -4 163.015 10.8599   3
  -7   0  -4 209.174 12.9628   8
  -7   0  -4 232.875 14.3497   3
  -7   0  -4 229.809 14.4466  10
  -8   0  -4 177.303 12.8424  10
  -9   0  -4 66.6399 7.54189   3
 -10   0  -4 66.3875 7.71837   3
 -11   0  -4 20.2668 4.36156   3
  11   0   4 26.2828 4.04262   6
 -12  -1   4 -0.5171 1.82127   9
  12  -1  -4 3.30456 2.28235   6
  12   1  -4 -2.8691 2.65927   4
  11  -1  -4 -0.9238 2.45653   6
  11   1  -4 3.84930 2.50689   6
  11   1  -4 6.47716 3.30765   4
  10  -1  -4 16.2048 4.26607   4
  10  -1  -4 15.5239 3.59210   6
  10   1  -4 20.2523 4.84393   4
  10   1  -4 13.6289 3.23600   6
   9  -1  -4 83.8783 8.23699   4
   9  -1  -4 107.270 8.08991   6
  -9   1   4 129.317 9.53965   3
   9   1  -4 105.719 11.9095   4
   8  -1  -4 65.0887 5.82817   6
   8  -1  -4 58.2844 6.22077   4
  -8  -1   4 51.9086 5.18226   8
  -8   1   4 51.9326 5.52972   8
  -8   1   4 50.9986 6.43776   3
   7  -1  -4 38.8461 5.26437   4
  -7  -1   4 42.7502 5.46248   3
  -7  -1   4 36.4301 3.99068   8
   7  -1  -4 40.2132 4.59385   6
  -7   1   4 37.7013 4.49434   8
  -7   1   4 41.0469 5.30376   3
   6  -1  -4 11.7011 3.11108   4
   6  -1  -4 9.72869 2.15595   6
  -6  -1   4 8.44248 2.90260   3
  -6  -1   4 6.19456 2.01190   8
   6   1  -4 8.31752 1.65203   8
  -6   1   4 8.77453 2.74912   3
  -6   1   4 4.68547 2.15901   8
   5  -1  -4 212.097 12.7406   6
  -5  -1   4 223.787 12.8393   5
   5  -1  -4 206.704 12.7412   4
  -5  -1   4 220.775 12.6454   3
  -5  -1   4 234.877 12.0930   8
   5  -1  -4 230.454 12.4252   8
  -5   1   4 197.741 13.1689   5
  -5   1   4 211.880 12.3273   3
   5   1  -4 218.709 11.8126   8
  -5   1   4 230.370 12.5746   8
   4  -1  -4 474.772 25.0475   8
  -4  -1   4 479.329 25.1922   5
  -4  -1   4 509.656 24.7700   8
  -4   1   4 499.336 25.1523   8
   4   1  -4 483.422 24.5843   8
   3  -1  -4 855.693 42.8224   8
  -3  -1   4 827.201 42.5858   5
  -3  -1   4 904.839 42.5478   8
  -3   1   4 886.212 42.9047   8
   3   1  -4 848.828 42.4180   8
  -2  -1   4 24.6157 2.52528   8
   2  -1  -4 22.2970 2.71932   8
  -2  -1   4 25.0512 2.11197   5
  -2   1   4 25.1541 2.87839   8
   2   1  -4 23.9212 2.36799   8
   1  -1  -4 33.2411 2.98710   8
  -1   1   4 37.5175 3.18695   8
   1   1  -4 38.2220 2.98477   8
  -1   1   4 38.2276 2.74581   5
   0  -1  -4 1086.45 52.2335   8
   0  -1  -4 1079.57 52.1381   5
   0   1   4 1096.54 52.2192   5
   0   1   4 1077.80 52.1945   8
   0   1  -4 1014.83 51.7917   5
  -1  -1  -4 1170.89 56.4939   8
   1   1   4 1217.65 56.9494   5
  -1   1  -4 1091.96 56.6082   5
  -2  -1  -4 47.9756 3.80983  10
  -2  -1  -4 48.8540 4.11070   5
  -2   1  -4 42.9430 4.03423   5
   2   1   4 49.2123 4.50575   5
  -2   1  -4 46.5686 3.82502  10
  -3  -1  -4 378.939 19.8855   5
  -3  -1  -4 375.849 19.7590  10
  -3   1  -4 368.563 19.6504  10
   3   1   4 380.134 20.3749   5
  -3   1  -4 360.380 19.9833   5
  -4  -1  -4 318.907 18.3133   3
  -4  -1  -4 355.947 18.9225  10
  -4  -1  -4 351.393 17.8088   8
   4   1   4 328.766 19.4789   5
  -4   1  -4 371.105 18.4804   8
  -4   1  -4 343.470 18.7045  10
  -5  -1  -4 119.329 8.14564   3
  -5  -1  -4 124.343 8.83497  10
  -5  -1  -4 115.914 7.25612   8
   5   1   4 112.404 9.25144   5
  -5   1  -4 123.830 8.07272   8
  -5   1  -4 123.676 8.44345   3
  -5   1  -4 115.707 8.48824  10
  -6  -1  -4 2.34480 2.74038   3
  -6  -1  -4 0.26631 1.56116   8
  -6  -1  -4 -0.5966 2.92974  10
  -6   1  -4 3.35928 2.04975   8
  -6   1  -4 1.50669 2.80399   3
  -6   1  -4 0.41833 2.64188  10
  -7  -1  -4 9.31375 2.39642   8
  -7  -1  -4 11.2607 4.12298  10
  -7  -1  -4 4.70927 3.58622   3
  -7   1  -4 11.0047 4.00415   3
  -7   1  -4 10.7840 3.81493  10
  -8  -1  -4 13.8609 4.59949  10
  -8   1  -4 10.4717 4.09944  10
  -8   1  -4 8.02080 4.60522   3
  -9  -1  -4 5.15094 4.03170   3
  -9   1  -4 1.57111 3.25607  10
  -9   1  -4 5.58420 3.98874   3
 -10  -1  -4 0.05477 3.59470   3
  10  -1   4 0.40719 3.15948   6
 -10   1  -4 -0.2465 3.60015   3
  11  -1   4 4.06563 3.00261   6
 -11   1  -4 8.44056 3.32269   3
  11   1   4 8.62006 3.32783   6
  12  -2  -4 6.22904 2.28886   6
 -12  -2   4 9.76887 2.27278   9
  12   2  -4 11.3924 2.97520   4
 -11  -2   4 50.7711 5.03025   9
  11  -2  -4 51.1947 5.32786   6
  11   2  -4 43.9631 5.80580   4
  10  -2  -4 124.931 9.17442   6
  10   2  -4 122.663 10.1816   4
   9  -2  -4 144.484 10.2850   4
   9  -2  -4 150.659 10.4323   6
  -9   2   4 155.403 10.9236   3
   8  -2  -4 70.0559 7.18128   4
   8  -2  -4 81.7380 6.87750   6
  -8   2   4 75.1812 7.17731   3
   7  -2  -4 31.8692 4.26897   6
   7  -2  -4 32.5393 4.86019   4
  -7  -2   4 31.3734 3.17517   8
  -7   2   4 33.4228 4.47758   8
  -7   2   4 38.8926 4.98346   3
   6  -2  -4 12.2643 3.02928   4
   6  -2  -4 10.0786 2.75604   6
  -6  -2   4 12.4983 1.95684   8
  -6   2   4 11.4161 2.88342   3
  -6   2   4 14.1954 2.98404   8
   5  -2  -4 283.976 15.6092   6
   5  -2  -4 284.571 16.1378   4
  -5  -2   4 277.812 15.6324   5
  -5  -2   4 299.963 14.8528   8
  -5   2   4 295.209 15.8915   8
   5   2  -4 283.901 14.6091   8
  -5   2   4 263.412 15.3856   3
  -4  -2   4 1765.17 84.4482   5
   4  -2  -4 1662.36 84.7265   8
  -4  -2   4 1785.86 83.9800   8
  -4   2   4 1751.43 84.8323   8
   4   2  -4 1682.26 83.8032   8
  -3  -2   4 3881.18 178.780   5
   3  -2  -4 3652.27 179.397   8
   3   2  -4 3647.43 178.640   8
   3   2  -4 3437.21 178.921   5
  -3   2   4 3919.95 179.545   8
  -2  -2   4 1347.33 62.0464   5
   2  -2  -4 1269.90 62.9282   8
  -2   2   4 1305.74 65.0155   8
   2   2  -4 1292.14 62.4461   8
   2   2  -4 1209.32 62.1986   5
   1  -2  -4 137.303 8.20431   8
   1   2  -4 154.523 7.39258   5
  -1   2   4 143.592 8.31555   8
  -1   2   4 153.955 8.26063   5
   0  -2  -4 180.466 9.79331   8
   0  -2  -4 189.675 9.95854   5
   0   2   4 176.898 9.77686   8
   0   2   4 188.464 10.0671   5
  -1  -2  -4 1404.71 62.4173   5
  -1  -2  -4 1293.27 61.8287   8
   1   2   4 1232.55 63.1336   5
  -1   2  -4 1157.84 62.1784   5
  -2  -2  -4 739.486 35.1648   5
  -2  -2  -4 650.651 34.8057  10
  -2  -2  -4 721.675 34.2741   8
   2   2   4 725.685 35.4543   5
  -2   2  -4 650.582 35.1751   5
  -3  -2  -4 1000.70 52.2474  10
  -3  -2  -4 1076.46 51.3596   8
  -3  -2  -4 1044.80 52.4623   5
   3   2   4 1078.52 53.0098   5
  -3   2  -4 1122.43 52.3352   8
  -3   2  -4 1060.39 52.3190  10
  -3   2  -4 983.929 52.7302   5
  -4  -2  -4 438.922 22.5846  10
  -4  -2  -4 423.557 20.9683   8
  -4  -2  -4 393.374 21.8478   3
   4   2   4 409.442 23.1617   5
  -4   2  -4 411.175 22.2531  10
  -4   2  -4 439.101 22.2932   8
  -5  -2  -4 603.634 30.2037  10
  -5  -2  -4 571.918 28.7304   8
  -5  -2  -4 571.621 29.4503   3
  -5   2  -4 581.255 29.6133   8
  -5   2  -4 571.975 29.8322  10
   5   2   4 502.599 30.4718   5
  -6  -2  -4 162.774 9.25208   8
  -6  -2  -4 176.364 12.2575  10
  -6  -2  -4 176.820 11.1109   3
  -6   2  -4 187.434 11.5075   3
  -6   2  -4 173.058 11.2448  10
   6   2   4 147.182 11.8941   5
  -6   2  -4 164.944 10.8130   8
  -7  -2  -4 6.78263 3.48516   3
  -7  -2  -4 7.63822 3.90732  10
  -7   2  -4 10.3546 3.93609  10
  -7   2  -4 10.2173 4.04502   3
  -8  -2  -4 4.53327 3.70752   3
  -8   2  -4 2.40970 3.63143   3
  -8   2  -4 3.71542 3.25536  10
  -9  -2  -4 24.3809 4.84935   3
   9  -2   4 23.7285 4.74356   6
  -9   2  -4 31.0861 5.31142  10
  -9   2  -4 27.4172 5.31838   3
  10  -2   4 110.926 12.7017   6
 -10   2  -4 115.642 12.0472   3
  11  -2   4 50.6093 5.80677   6
 -11  -2  -4 50.8081 4.41374   9
 -11   2  -4 56.3603 6.33352   3
  12  -3  -4 -3.6887 1.88918   6
 -12  -3   4 -0.1279 1.63294   9
  12   3  -4 4.01395 2.28760   4
 -11  -3   4 -3.3604 1.88692   9
  11  -3  -4 3.24877 2.45634   6
  11   3  -4 2.84208 3.26262   4
  10  -3  -4 -1.0185 2.58238   6
 -10  -3   4 -1.3971 2.36949   9
   9  -3  -4 22.0999 4.21081   6
   9  -3  -4 12.5833 4.19885   4
  -9  -3   4 22.6682 3.37040   9
  -9   3   4 23.2908 4.54658   3
  -8  -3   4 7.09279 2.56309   9
   8  -3  -4 8.59807 3.08377   6
   8  -3  -4 4.10621 3.11690   4
  -8   3   4 6.67719 3.51217   3
   7  -3  -4 202.688 12.8582   4
  -7  -3   4 213.076 11.4535   9
   7  -3  -4 198.595 12.5971   6
  -7   3   4 195.693 12.3537   3
  -7   3   4 206.265 12.9480   8
  -6  -3   4 16.1016 2.44476   9
   6  -3  -4 11.5356 3.08542   6
   6  -3  -4 18.0260 3.89724   4
  -6   3   4 13.5152 3.08147   8
  -6   3   4 16.4692 3.02381   3
  -5  -3   4 373.532 21.5800   5
   5  -3  -4 391.677 21.3558   6
   5  -3  -4 406.523 21.8937   4
  -5  -3   4 425.784 20.3664   9
  -5   3   4 380.266 20.9333   3
  -5   3   4 424.982 21.7554   8
  -4  -3   4 519.127 25.3951   9
  -4  -3   4 515.618 25.7320   5
   4  -3  -4 505.191 26.6930   6
   4  -3  -4 502.574 26.8624   4
  -4   3   4 523.351 26.6126   8
   4   3  -4 508.236 24.9466   8
   4   3  -4 491.327 26.1648   5
   3  -3  -4 1079.82 55.8374   8
   3  -3  -4 1141.40 56.3578   6
  -3  -3   4 1189.46 55.0156   5
  -3  -3   4 1096.39 54.8842   9
  -3   3   4 1155.38 55.9934   8
   3   3  -4 1135.49 55.4003   5
   3   3  -4 1099.41 54.7591   8
   2  -3  -4 607.768 31.9267   8
  -2   3   4 656.015 32.1230   8
   2   3  -4 650.001 31.3672   5
   2   3  -4 628.150 31.3195   8
   1  -3  -4 185.154 11.0623   8
  -1   3   4 217.612 11.4088   5
   1   3  -4 216.096 10.5450   5
  -1   3   4 203.103 11.8371   8
   0   3   4 816.598 41.2571   8
   0   3   4 861.615 41.7299   5
  -1  -3  -4 44.5220 3.77057   5
  -1  -3  -4 42.1080 2.89889   8
  -1  -3  -4 37.3618 4.06090  10
   1   3   4 42.5626 4.04461   5
  -2  -3  -4 116.387 7.32741   6
   2  -3   4 109.723 6.29884   9
  -2  -3  -4 123.786 7.48501   5
  -2  -3  -4 110.521 6.98292  10
  -2  -3  -4 118.186 6.12772   8
  -2   3  -4 125.387 7.51025   8
  -2   3  -4 102.167 7.48767   5
   2   3   4 117.683 7.80055   5
  -3  -3  -4 52.8486 4.63909  10
  -3  -3  -4 52.9229 2.80961   8
   3  -3   4 44.4991 4.57508   6
   3  -3   4 50.8992 3.79049   2
  -3  -3  -4 51.6062 2.76502   8
   3   3   4 57.0835 5.46569   5
  -3   3  -4 39.4077 4.70373   5
  -3   3  -4 49.5787 4.43241  10
  -3   3  -4 57.4023 4.75481   8
   4  -3   4 30.7305 4.32101   6
  -4  -3  -4 34.3233 3.73152   3
  -4  -3  -4 31.4580 4.14534  10
  -4   3  -4 32.0138 4.22309   8
   4   3   4 30.9060 4.54944   5
  -4   3  -4 34.3291 4.13202  10
  -5  -3  -4 41.3692 5.23529  10
   5  -3   4 41.2273 5.19510   6
   5  -3   4 41.1443 3.49233   2
  -5  -3  -4 41.4738 4.38280   3
  -5   3  -4 44.8564 5.02855   8
  -5   3  -4 46.0819 4.95450  10
   5   3   4 36.4648 5.41574   5
  -6  -3  -4 65.1888 6.93089  10
  -6  -3  -4 65.8894 6.02638   3
   6  -3   4 61.5393 6.71680   6
  -6   3  -4 66.9470 6.08683   8
  -6   3  -4 63.2416 6.19833  10
  -6   3  -4 69.5645 6.74912   3
   6   3   4 56.2701 7.07819   5
   7  -3   4 8.86020 3.85816   6
  -7  -3  -4 10.2492 3.63170   3
  -7   3  -4 8.12981 3.58410  10
  -7   3  -4 8.05367 4.00924   3
   8  -3   4 28.6726 5.32315   6
  -8  -3  -4 37.5931 5.58095   3
  -8   3  -4 33.4642 4.99351  10
  -8   3  -4 32.0659 5.34136   3
   9  -3   4 0.12094 3.41004   6
  -9   3  -4 0.16560 3.46981   3
 -10  -3  -4 -0.2283 2.21946   9
  10  -3   4 8.33018 3.90366   6
 -10   3  -4 4.30418 3.93987   3
 -11  -3  -4 3.98206 1.81999   9
  11  -3   4 9.92819 3.12510   6
 -11   3  -4 5.71788 2.96129   3
  12  -4  -4 6.66053 1.90577   6
 -12  -4   4 2.79926 1.66480   9
  12   4  -4 0.50574 2.19082   4
 -11  -4   4 3.30381 2.24191   9
  11  -4  -4 -4.0637 2.09917   6
  11   4  -4 2.02967 3.38788   4
  10  -4  -4 14.9816 3.54456   6
 -10  -4   4 13.4459 2.90797   9
  -9  -4   4 8.98744 2.84821   9
   9  -4  -4 13.0642 3.42125   6
  -9   4   4 11.6806 3.54896   3
  -8  -4   4 12.8177 2.95841   9
   8  -4  -4 11.5705 4.40171   6
  -8   4   4 17.2722 3.68258   3
  -7  -4   4 11.5745 2.65894   9
   7  -4  -4 6.31553 3.34283   6
  -7   4   4 5.80132 2.64863   3
   6  -4  -4 79.8509 6.69830   6
  -6  -4   4 70.9107 5.25049   9
  -6   4   4 61.1006 5.64502   3
  -6   4   4 75.8905 7.24782   8
  -5  -4   4 19.5581 2.54404   9
   5  -4  -4 18.9065 3.54170   6
  -5  -4   4 11.3246 2.04673   5
  -5   4   4 14.5011 3.31102   8
  -5   4   4 20.8762 2.84052   3
   5   4  -4 10.6776 2.37619   5
  -4  -4   4 190.457 10.4291   5
  -4  -4   4 199.259 10.3764   9
   4  -4  -4 184.639 11.5226   6
  -4   4   4 192.661 11.6117   8
   4   4  -4 187.529 11.0914   5
   3  -4  -4 182.612 10.3289   2
  -3  -4   4 177.941 9.79421   9
   3  -4  -4 189.261 11.0417   6
   3   4  -4 177.708 9.22914   8
  -3   4   4 192.164 11.0164   8
   3   4  -4 185.345 10.3665   5
   3   4  -4 181.028 9.20863   8
  -2  -4   4 1429.99 72.0264   2
   2  -4  -4 1459.73 73.0579   6
  -2  -4   4 1432.64 71.7400   9
   2  -4  -4 1468.94 72.3622   2
   2  -4  -4 1370.00 72.4732   8
   2   4  -4 1427.65 71.7714   8
  -2   4   4 1555.01 72.8072   8
  -2   4   4 1614.88 72.8859   5
   2   4  -4 1545.68 72.1213   5
  -1  -4   4 207.899 10.9268   9
  -1  -4   4 193.013 11.2442   2
   1  -4  -4 213.480 11.5707   2
   1  -4  -4 192.251 11.9011   6
   1  -4  -4 197.484 11.3996   8
   1   4  -4 223.455 11.1287   5
  -1   4   4 223.777 11.7457   8
  -1   4   4 229.111 12.0631   5
   0  -4  -4 525.965 27.9328   6
   0  -4   4 534.055 26.8788   9
   0  -4  -4 544.331 27.5112   2
   0  -4   4 523.103 27.2959   2
   0  -4  -4 518.101 27.1376   8
   0   4   4 562.325 27.3328   8
   0   4  -4 558.357 27.0944   5
   0   4   4 558.424 27.9622   5
   0   4  -4 573.336 27.5368   8
   1  -4   4 12.7872 1.75388   9
  -1  -4  -4 15.4062 1.64780   8
  -1  -4  -4 16.6879 2.85016   6
   1  -4   4 15.8214 2.52340   6
   1  -4   4 15.4121 2.21387   2
   1   4   4 13.7619 2.66634   5
  -1   4  -4 17.1170 2.58170   8
   2  -4   4 21.8355 3.07477   6
  -2  -4  -4 12.7721 2.65233   6
   2  -4   4 15.7633 2.40121   2
  -2  -4  -4 16.2435 1.83274   9
   2  -4   4 19.5280 2.05496   9
   2   4   4 16.6553 3.04789   5
  -2   4  -4 15.2741 2.61878   8
   3  -4   4 119.658 8.34035   6
  -3  -4  -4 126.389 8.14549   6
   3  -4   4 125.432 7.05185   9
  -3  -4  -4 121.954 6.88912   9
   3  -4   4 125.196 7.42462   2
  -3   4  -4 110.528 9.07576  10
   3   4   4 126.771 8.95302   5
  -3   4  -4 132.368 8.42587   8
   4  -4   4 298.825 16.4590   6
  -4  -4  -4 274.839 14.5855   9
   4  -4   4 280.072 15.0371   2
   4   4   4 272.566 16.7856   5
  -4   4  -4 281.913 15.7019  10
  -4   4  -4 284.964 16.1839   8
   5  -4   4 24.9968 4.28423   6
  -5  -4  -4 33.8372 3.76054   3
   5  -4   4 24.2353 2.99561   2
  -5   4  -4 30.1970 6.50409   8
   5   4   4 24.7527 4.95635   5
  -5   4  -4 21.6663 3.60861  10
   6  -4   4 9.82467 1.91988   2
   6  -4   4 8.51800 3.87257   6
  -6   4  -4 7.50398 3.59234   3
  -6   4  -4 4.69851 2.60215  10
   7  -4   4 1.99424 3.75789   6
  -7   4  -4 6.58433 3.00543  10
  -7   4  -4 0.94779 4.46636   3
   8  -4   4 117.195 9.74056   6
  -8  -4  -4 124.110 7.84793   9
  -8   4  -4 99.2907 8.65350  10
  -8   4  -4 121.222 9.71513   3
   9  -4   4 56.8519 7.14586   6
  -9  -4  -4 54.6335 5.13675   9
  -9   4  -4 59.5598 7.11569   3
  10  -4   4 43.0321 5.41843   6
 -10  -4  -4 36.7211 3.96181   9
 -10   4  -4 27.1174 4.67050   3
 -11  -4  -4 11.0846 1.98817   9
  11  -4   4 11.8640 3.21143   6
 -11   4  -4 19.1205 3.49619   3
  11  -5  -4 2.63345 2.54417   6
 -11  -5   4 -1.4152 1.89947   9
  11   5  -4 1.05702 2.72400   4
  10  -5  -4 3.73153 2.99412   6
 -10  -5   4 1.17684 2.26792   9
  -9  -5   4 1.96072 2.74081   9
   9  -5  -4 1.50221 2.99901   6
   8  -5  -4 22.2467 4.19640   6
  -8  -5   4 26.8601 3.64566   9
  -8   5   4 14.8088 3.23114   3
   7  -5  -4 79.6059 7.43915   6
  -7   5   4 74.4140 6.13333   3
   6  -5  -4 11.9940 3.32468   6
  -6  -5   4 12.2634 2.63460   9
  -6   5   4 13.3122 2.71565   3
  -5  -5   4 8.59993 2.22505   9
   5  -5  -4 11.5406 3.26716   6
  -5   5   4 4.73763 1.97037   3
   5   5  -4 7.39155 2.22608   5
   4  -5  -4 -2.6952 2.15487   6
  -4  -5   4 -0.7615 1.32343   2
  -4  -5   4 -1.0533 1.54932   9
   4   5  -4 0.29852 1.49050   5
  -4   5   4 -2.4977 1.84655   8
   3  -5  -4 26.9050 4.04584   6
  -3  -5   4 30.2384 2.98155   9
  -3  -5   4 23.0373 2.92292   2
  -3  -5   4 30.2323 3.14641   6
   3  -5  -4 29.6948 3.53508   2
  -3   5   4 29.7190 3.96341   8
  -3   5   4 28.3311 3.98274   5
   3   5  -4 26.9051 3.27053   5
  -2  -5   4 61.8931 4.28286   9
   2  -5  -4 69.3047 5.25589   2
  -2  -5   4 60.1574 4.71547   2
   2  -5  -4 59.4757 3.84067   9
  -2  -5   4 60.5791 4.82471   6
   2  -5  -4 65.8501 5.66465   6
  -2   5   4 68.5482 5.52134   5
  -2   5   4 69.7408 5.35837   8
   2   5  -4 65.4236 4.01689   8
   2   5  -4 66.0747 4.68099   5
   2   5  -4 60.8545 4.41972   8
   1  -5  -4 39.3110 4.33448   6
  -1  -5   4 35.5486 3.98887   6
  -1  -5   4 40.4836 3.02809   9
  -1  -5   4 36.1636 3.54605   2
   1  -5  -4 39.0987 3.73907   2
   1  -5  -4 28.8067 3.04267   8
  -1   5   4 34.6765 4.78835   5
   1   5  -4 36.1489 3.12342   8
  -1   5   4 37.8678 3.63725   8
   1   5  -4 35.3813 3.16017   5
   0  -5   4 0.62781 1.64760   6
   0  -5  -4 1.83257 1.04181   8
   0  -5   4 0.24377 1.16034   9
   0  -5  -4 -1.5555 1.52884   2
   0  -5   4 -0.9255 1.60987   2
   0  -5  -4 2.83332 0.88684   9
   0  -5  -4 -0.1325 1.78598   6
   0   5  -4 0.54877 1.06069   5
   0   5   4 2.55654 1.85855   5
   0   5   4 1.08600 1.09335   8
   0   5  -4 0.79092 1.28947   8
  -1  -5  -4 10.0780 1.48560   9
   1  -5   4 8.67603 1.63273   9
   1  -5   4 11.5913 2.32666   2
  -1  -5  -4 6.34174 2.43899   6
   1  -5   4 7.11901 2.19891   6
   1   5   4 10.4964 2.81427   5
  -1   5  -4 6.80734 1.99123   8
  -1   5  -4 5.48167 1.49333   5
   2  -5   4 45.2559 4.19308   2
  -2  -5  -4 43.4035 4.56154   6
   2  -5   4 35.0955 4.40095   6
   2  -5   4 46.7296 3.55188   9
  -2  -5  -4 38.6264 3.03373   9
  -2   5  -4 38.9390 4.46421   8
   2   5   4 40.4046 4.89419   5
  -3  -5  -4 1.61558 2.13279   6
  -3  -5  -4 -1.9609 1.13648   9
   3  -5   4 1.91132 1.56001   9
   3  -5   4 2.06477 2.16433   2
   3   5   4 -0.2937 2.13545   5
  -3   5  -4 0.06634 1.72824  10
  -3   5  -4 2.87296 2.04256   8
   4  -5   4 21.8992 3.18920   2
   4  -5   4 19.7044 4.00318   6
  -4  -5  -4 15.9623 2.25264   9
  -4   5  -4 19.8446 2.99322  10
   4   5   4 18.7520 3.79640   5
  -4   5  -4 11.2962 3.03684   8
  -5  -5  -4 81.2940 5.48647   9
   5  -5   4 77.0079 5.86784   2
   5  -5   4 86.1193 7.76292   6
  -5   5  -4 69.5954 6.10780  10
  -6  -5  -4 88.8815 6.25440   9
   6  -5   4 89.8755 8.19658   6
   6  -5   4 81.4410 6.13675   2
  -6   5  -4 92.3894 6.94598  10
  -6   5  -4 90.1141 7.74803   3
  -7  -5  -4 4.28947 2.35705   9
   7  -5   4 2.41753 3.48880   6
  -7   5  -4 2.35851 3.56843   3
  -7   5  -4 8.45100 2.94744  10
   8  -5   4 8.32459 4.18722   6
  -8  -5  -4 11.2124 2.66479   9
  -8   5  -4 9.01068 2.79211  10
  -8   5  -4 14.0081 4.33173   3
  -9  -5  -4 10.7417 2.51588   9
   9  -5   4 8.34540 4.09666   6
  -9   5  -4 7.09610 3.47271   3
  10  -5   4 3.90339 3.02339   6
 -10  -5  -4 4.07416 1.95255   9
 -10   5  -4 3.32309 2.79261   3
  11  -6  -4 0.02710 1.90250   6
 -11  -6   4 2.03681 1.51171   9
  11   6  -4 1.16711 2.46749   4
  10  -6  -4 5.99293 3.19662   6
 -10  -6   4 5.24858 2.21013   9
  -9  -6   4 17.6817 3.35933   9
  -8  -6   4 23.5637 3.40859   9
   8  -6  -4 23.2759 4.64014   6
   7  -6  -4 52.3718 7.03507   6
  -7  -6   4 62.7752 5.23576   9
  -7   6   4 52.9075 5.59169   3
   6  -6  -4 157.881 12.3179   6
  -5  -6   4 83.1970 5.78630   9
   5  -6  -4 69.2001 7.42188   6
  -4  -6   4 44.3404 3.93018   2
   4  -6  -4 49.0533 6.09993   6
  -4  -6   4 41.4784 4.11287   9
  -4   6   4 44.5579 5.09298   5
   4   6  -4 47.2694 4.55099   5
  -4   6   4 46.8552 5.24904   8
   3  -6  -4 129.096 8.95784   6
  -3  -6   4 121.188 7.60736   2
   3  -6  -4 113.581 7.85518   2
  -3  -6   4 113.524 6.99107   9
  -3  -6   4 108.143 7.41056   6
   3   6  -4 109.038 7.49299   5
  -3   6   4 103.619 8.02130   8
  -3   6   4 119.962 8.33889   5
   2  -6  -4 180.878 11.5899   6
  -2  -6   4 172.526 10.5070   6
  -2  -6   4 184.208 9.91720   9
   2  -6  -4 174.036 9.37887   9
   2  -6  -4 181.885 10.8117   2
  -2   6   4 180.948 10.9020   8
   2   6  -4 174.701 10.3723   5
   2   6  -4 171.270 9.29578   8
  -2   6   4 187.775 11.3241   5
   1  -6  -4 321.814 17.5709   6
   1  -6  -4 297.638 15.4057   9
  -1  -6   4 293.096 16.6358   6
  -1  -6   4 301.501 16.8644   2
  -1  -6   4 319.475 15.8450   9
   1  -6  -4 306.387 16.7269   2
  -1   6   4 297.348 17.1155   5
  -1   6   4 293.681 16.4515   8
   1   6  -4 313.937 16.0716   8
   1   6  -4 303.343 16.3190   5
   0  -6  -4 125.166 8.93732   6
   0  -6  -4 125.324 6.97430   9
   0  -6   4 119.329 8.44719   6
   0  -6   4 128.863 7.38122   9
   0  -6   4 128.563 8.19245   2
   0   6  -4 133.372 7.94218   8
   0   6  -4 127.391 8.34864   5
   0   6   4 125.047 7.55447   8
   0   6   4 127.742 8.79345   5
   1  -6   4 276.259 14.9996   2
   1  -6   4 267.043 15.4885   6
  -1  -6  -4 269.256 13.7964   9
  -1  -6  -4 272.887 15.6642   6
   1  -6   4 281.419 14.1431   9
  -1   6  -4 266.957 15.0206   8
  -1   6  -4 268.706 14.6454   5
   1   6   4 251.434 15.5665   5
   2  -6   4 914.096 44.3031   6
  -2  -6  -4 878.174 42.3980   9
   2  -6   4 898.509 42.6441   9
   2  -6   4 874.763 43.3521   2
  -2  -6  -4 864.512 44.0511   6
  -2   6  -4 849.767 43.8869   8
   2   6   4 825.321 44.4138   5
  -2   6  -4 843.811 43.3161   5
  -2   6  -4 828.625 43.0981  10
  -3  -6  -4 626.371 31.7796   6
  -3  -6  -4 614.429 30.1611   9
   3  -6   4 616.756 31.0784   2
   3  -6   4 648.616 32.3014   6
   3  -6   4 604.409 30.2917   9
  -3   6  -4 555.378 30.7454  10
   3   6   4 576.820 32.5560   5
  -3   6  -4 617.781 34.1828   8
   4  -6   4 268.331 16.0287   6
   4  -6   4 264.859 14.5588   2
  -4  -6  -4 267.571 13.6568   9
  -4   6  -4 232.616 14.1226  10
   5  -6   4 38.1203 4.69530   2
  -5  -6  -4 36.5833 3.79776   9
   5  -6   4 38.7806 5.85643   6
  -5   6  -4 35.7339 5.00508   3
   6  -6   4 3.57070 2.27501   2
   6  -6   4 10.6135 3.94497   6
  -6  -6  -4 7.30291 2.45742   9
  -6   6  -4 7.29063 3.26763   3
  -7  -6  -4 101.377 6.52465   9
   7  -6   4 95.6411 8.89564   6
   7  -6   4 77.4655 6.00648   2
  -7   6  -4 91.2044 7.76541   3
   8  -6   4 21.7193 4.57602   6
  -8  -6  -4 23.4091 3.56355   9
  -8   6  -4 16.4559 5.08084   3
   9  -6   4 5.31461 3.51629   6
  -9  -6  -4 4.06970 1.95293   9
  -9   6  -4 6.16516 2.81666   3
 -10  -6  -4 1.97075 1.31452   9
 -10   6  -4 -2.3516 1.73867   3
 -10  -7   4 3.56439 1.87329   9
  10  -7  -4 5.34673 2.84627   6
   9  -7  -4 8.73382 3.17005   6
  -9  -7   4 7.76855 2.30021   9
   8  -7  -4 -0.0456 2.99654   6
  -8  -7   4 -0.6101 2.06219   9
   7  -7  -4 14.6085 4.07897   6
  -7  -7   4 6.83391 2.57373   9
   6  -7  -4 11.0070 4.17953   6
  -6  -7   4 9.40795 2.58779   9
  -5  -7   4 86.8816 6.48480   9
   5  -7  -4 88.5117 8.38624   6
  -4  -7   4 11.4031 2.47764   2
   4  -7  -4 7.90558 3.76731   6
  -4  -7   4 7.65777 2.36368   9
  -3  -7   4 41.5978 4.07420   9
  -3  -7   4 37.5286 4.38893   2
   3  -7  -4 45.1323 5.93751   6
  -3  -7   4 37.3166 4.28631   6
  -2  -7   4 9.74984 2.55556   6
  -2  -7   4 3.97032 2.26328   2
   2  -7  -4 5.87543 1.43560   9
  -2  -7   4 6.83278 2.18807   9
   2  -7  -4 -2.8092 2.69210   6
   2   7  -4 1.91857 1.74372   5
  -2   7   4 6.38598 2.18980   8
   1  -7  -4 17.9802 4.17025   6
  -1  -7   4 24.5993 2.97665   9
   1  -7  -4 21.2036 2.53978   9
  -1  -7   4 22.4473 3.65054   2
  -1  -7   4 21.1116 3.60964   6
  -1   7   4 17.6329 3.73694   5
  -1   7   4 15.8627 2.54325   8
   1   7  -4 15.9542 2.72748   5
   0  -7   4 24.5125 3.86739   6
   0  -7   4 29.0447 3.13552   9
   0  -7   4 32.7868 4.06378   2
   0  -7  -4 29.6814 4.67145   6
   0  -7  -4 27.1535 2.64784   9
   0   7  -4 26.0310 3.34216   5
   0   7  -4 25.6960 3.36523   8
   0   7   4 22.2699 3.99376   5
  -1  -7  -4 1.40997 2.88444   6
   1  -7   4 0.08975 1.76668   9
  -1  -7  -4 1.22107 1.21132   9
   1  -7   4 2.97346 2.64093   6
   1  -7   4 4.32778 2.69766   2
   1   7   4 0.93032 2.10518   5
  -1   7  -4 3.93491 1.91708   8
  -1   7  -4 4.23319 1.75168   5
   2  -7   4 13.9697 2.45953   9
  -2  -7  -4 14.2929 2.10488   9
  -2  -7  -4 12.3184 3.39626   6
   2  -7   4 12.0211 3.22272   2
   2  -7   4 14.3054 3.71290   6
  -2   7  -4 11.9325 2.35952   5
  -2   7  -4 9.20776 2.74539   8
   3  -7   4 92.5017 6.33315   9
  -3  -7  -4 95.6854 7.83918   6
   3  -7   4 99.1788 7.36738   2
   3  -7   4 94.7612 8.44597   6
  -3  -7  -4 91.3438 5.92311   9
   4  -7   4 106.985 9.52088   6
  -4  -7  -4 118.030 6.99574   9
   4  -7   4 137.606 10.4573   2
  -4   7  -4 104.431 7.70782   3
   5  -7   4 -2.8850 2.07060   2
  -5  -7  -4 2.08535 1.79390   9
   5  -7   4 0.69375 3.40894   6
  -5   7  -4 -3.0936 2.09429   3
  -6  -7  -4 -1.9720 1.81998   9
   6  -7   4 1.83971 2.18226   2
   6  -7   4 -0.9481 3.35327   6
  -6   7  -4 1.06257 2.65927   3
  -7  -7  -4 4.00505 1.96482   9
   7  -7   4 1.38097 3.68821   6
  -8  -7  -4 23.0426 2.79360   9
   8  -7   4 19.2815 4.13770   6
  -8   7  -4 24.3383 3.45030   3
  -9  -7  -4 0.76660 1.32321   9
   9  -7   4 -3.5535 2.32854   6
  -9   7  -4 -2.9404 1.80295   3
   9  -8  -4 27.7335 4.06076   6
  -9  -8   4 38.1520 3.58199   9
   8  -8  -4 2.30411 3.11918   6
  -8  -8   4 4.19730 2.13437   9
   7  -8  -4 8.72087 4.50112   6
  -7  -8   4 12.7338 3.76681   9
  -6  -8   4 92.4549 6.61210   9
   6  -8  -4 99.1290 9.02986   6
   5  -8  -4 213.875 13.9674   6
  -5  -8   4 203.280 11.8006   9
  -4  -8   4 234.322 14.2402   2
   4  -8  -4 265.967 16.4319   6
  -4  -8   4 285.211 14.3484   9
  -3  -8   4 47.7330 4.64006   6
  -3  -8   4 43.7790 4.66058   9
  -3  -8   4 43.8853 5.41760   2
   3  -8  -4 59.8970 7.41118   6
  -2  -8   4 15.9005 2.73495   9
  -2  -8   4 16.4772 3.27031   6
   2  -8  -4 12.2880 4.06113   6
  -2  -8   4 14.4153 3.89314   2
   2  -8  -4 17.8083 2.14954   9
   1  -8  -4 139.844 7.84630   9
  -1  -8   4 138.485 9.60901   2
  -1  -8   4 139.220 9.10129   9
  -1  -8   4 141.880 9.66394   6
   0  -8  -4 138.888 7.97601   9
   0  -8   4 152.375 8.84831   9
   0  -8   4 141.081 9.95649   6
  -1  -8  -4 117.686 6.98905   9
   1  -8   4 122.754 9.28817   6
   1  -8   4 122.357 9.03909   9
  -1  -8  -4 127.737 9.43522   6
   1  -8   4 115.380 8.65435   2
  -2  -8  -4 97.7227 5.98854   9
   2  -8   4 100.510 7.74436   2
  -2  -8  -4 97.5200 8.43598   6
   2  -8   4 98.0430 8.57129   6
   2  -8   4 100.713 6.49197   9
   3  -8   4 14.3641 3.34422   2
  -3  -8  -4 11.6012 2.10671   9
  -3  -8  -4 10.1524 3.60500   6
   3  -8   4 7.99228 3.74484   6
  -4  -8  -4 13.4725 2.34642   9
   4  -8   4 12.4966 3.31879   2
   4  -8   4 14.7129 4.30802   6
  -5  -8  -4 10.5136 2.21421   9
   5  -8   4 12.4789 3.19797   2
   5  -8   4 11.1601 4.25620   6
  -6  -8  -4 59.9508 5.00193   9
   6  -8   4 54.0116 5.50307   2
   6  -8   4 62.4267 7.52838   6
  -7  -8  -4 93.8081 5.96791   9
   7  -8   4 104.222 8.58726   6
  -8  -8  -4 2.87952 1.38494   9
   8  -8   4 -0.2832 2.47119   6
  -8  -9   4 0.92769 1.92635   9
   8  -9  -4 1.46305 2.91090   6
   7  -9  -4 7.62843 3.50245   6
  -7  -9   4 14.0689 2.65526   9
  -6  -9   4 0.00077 2.18463   9
   6  -9  -4 1.79646 2.91725   6
   5  -9  -4 0.51264 3.26171   6
  -5  -9   4 -2.5242 2.00094   9
  -4  -9   4 2.91272 2.18539   9
   4  -9  -4 7.51615 4.10186   6
  -3  -9   4 2.68710 2.11494   6
   3  -9  -4 6.99245 3.76393   6
  -3  -9   4 8.51409 2.75650   2
  -3  -9   4 3.07532 2.15768   9
   2  -9  -4 -2.3988 3.09919   6
  -2  -9   4 2.57539 2.50522   2
  -2  -9   4 0.04173 2.19787   6
  -2  -9   4 -0.3720 2.05683   9
  -1  -9   4 0.50063 2.79955   2
   1  -9  -4 0.31063 1.30097   9
  -1  -9   4 2.21672 2.07497   9
  -1  -9   4 -1.0129 2.32331   6
   1  -9  -4 2.29232 3.22575   6
   0  -9   4 21.1388 4.04220   6
   0  -9   4 34.1885 3.55961   9
   0  -9  -4 25.8437 2.80706   9
   0  -9   4 15.3213 3.64668   2
   0  -9  -4 29.0891 4.95831   6
  -1  -9  -4 15.8421 4.20907   6
  -1  -9  -4 13.4496 2.05509   9
   1  -9   4 10.9068 2.44798   9
   1  -9   4 17.2060 4.05916   6
   1  -9   4 9.31352 3.25141   2
   2  -9   4 9.10796 2.36283   9
  -2  -9  -4 11.0655 3.68700   6
   2  -9   4 15.0034 3.94473   6
  -2  -9  -4 10.9416 1.90913   9
   2  -9   4 11.0568 3.49103   2
   3  -9   4 -1.4089 2.68384   2
  -3  -9  -4 -0.2745 1.30814   9
   3  -9   4 -1.5248 3.01379   6
   4  -9   4 2.31622 3.46548   6
   4  -9   4 -1.6645 2.32718   2
   5  -9   4 -1.6042 2.96448   6
   5  -9   4 1.56311 2.38450   2
  -5  -9  -4 -2.3521 1.20283   9
  -6  -9  -4 5.09555 1.44261   9
   6  -9   4 1.54236 2.74521   6
  -7  -9  -4 -1.4737 1.22239   9
   7  -9   4 -0.8557 2.41383   6
   6 -10  -4 17.1410 3.22418   6
  -6 -10   4 24.1041 2.70725   9
   5 -10  -4 1.36583 2.69483   6
  -5 -10   4 1.12331 1.75607   9
   4 -10  -4 7.66797 3.26096   6
  -4 -10   4 5.54064 2.26283   9
  -3 -10   4 3.59080 1.99795   9
   3 -10  -4 3.01906 3.03789   6
   2 -10  -4 47.5655 6.67046   6
  -2 -10   4 43.7839 5.16361   9
  -2 -10   4 37.2313 5.66926   2
   1 -10  -4 23.2402 4.33161   6
  -1 -10   4 18.0586 2.65453   9
  -1 -10   4 17.3932 3.39991   2
   0 -10   4 131.760 9.20376   2
   0 -10   4 132.500 8.09224   9
   0 -10  -4 142.230 10.0630   6
  -1 -10  -4 168.397 12.2634   6
   1 -10   4 170.101 10.7098   9
   1 -10   4 168.603 11.6548   6
   1 -10   4 167.154 11.0662   2
  -1 -10  -4 158.181 8.90415   9
   2 -10   4 149.083 9.61141   6
  -2 -10  -4 130.121 7.30313   9
   2 -10   4 126.905 9.15231   2
  -2 -10  -4 134.317 9.30028   6
   3 -10   4 16.5888 3.91474   6
   3 -10   4 12.8954 3.18606   2
  -3 -10  -4 9.41710 1.65482   9
   4 -10   4 10.6080 2.63855   2
   4 -10   4 8.94309 3.19030   6
   5 -10   4 -1.0189 2.27309   6
   6 -10   4 -2.7158 1.78008   6
   4 -11  -4 11.6892 2.69263   6
  -4 -11   4 14.2757 2.08073   9
  -3 -11   4 30.1614 3.14930   9
   3 -11  -4 33.6340 4.58759   6
  -2 -11   4 1.67858 1.57340   9
   2 -11  -4 -0.9106 2.24840   6
   1 -11  -4 -0.0432 2.19611   6
  -1 -11   4 1.32677 2.27218   6
  -1 -11   4 1.56905 1.46283   9
   0 -11  -4 2.69595 2.26640   6
   0 -11   4 0.00363 1.24407   9
   0 -11   4 1.72772 2.20520   6
   1 -11   4 7.74286 2.40129   6
  -1 -11  -4 5.42924 2.52444   6
   2 -11   4 10.1428 3.30342   6
   3 -11   4 -2.6561 1.60616   6
 -12   0   5 -0.0796 1.66194   9
  11   0  -5 -4.1234 3.19310   4
  11   0  -5 1.99941 2.26022   6
  10   0  -5 0.19331 3.27933   4
  10   0  -5 1.48131 2.61840   6
   9   0  -5 -4.8294 2.18701   6
   9   0  -5 3.80425 3.39298   4
   8   0  -5 -2.9927 2.58252   4
  -8   0   5 4.08829 2.32352   8
  -8   0   5 5.07747 3.62105   3
   8   0  -5 1.11680 2.35236   6
  -7   0   5 2.19485 1.97594   8
   7   0  -5 0.06026 2.97393   4
  -7   0   5 -1.6266 2.45955   3
   6   0  -5 6.19386 2.88360   4
  -6   0   5 -1.7616 1.62149   8
  -6   0   5 0.93633 2.44277   3
  -5   0   5 0.67278 1.58924   8
  -5   0   5 0.39895 3.31241   5
  -5   0   5 -0.1988 1.79731   3
   5   0  -5 1.91491 1.50263   8
  -4   0   5 0.77311 1.60044   8
   4   0  -5 -1.4505 1.29216   8
  -4   0   5 -0.3908 1.47441   5
  -3   0   5 1.39250 1.57963   8
   3   0  -5 1.74981 1.42080   8
  -2   0   5 0.94404 1.49025   8
   2   0  -5 1.20937 1.33309   8
  -1   0   5 0.38054 0.72091   5
   1   0  -5 1.74780 1.39143   8
  -1   0   5 1.72982 1.41936   8
   0   0  -5 0.18009 0.81557   5
   0   0  -5 -0.3253 1.23238   8
   0   0   5 0.78110 1.03866   5
   1   0   5 -0.9902 1.25970   5
  -1   0  -5 0.57058 1.19683   5
   2   0   5 1.33980 1.75431   5
  -2   0  -5 0.73061 1.54093  10
  -2   0  -5 0.85770 1.41008   5
   3   0   5 1.94979 2.17793   5
  -3   0  -5 0.14009 1.56448   5
  -3   0  -5 -0.5008 1.76145  10
   4   0   5 -0.8765 2.03745   5
  -4   0  -5 0.85014 1.45772   8
  -4   0  -5 0.21005 1.99858  10
  -5   0  -5 -3.2224 2.11924   3
  -5   0  -5 1.79205 2.51774  10
  -5   0  -5 -1.7341 1.54386   8
  -6   0  -5 0.80061 1.96119   8
  -6   0  -5 -2.8765 2.70190  10
  -6   0  -5 -0.7904 2.61455   3
  -7   0  -5 3.01971 2.37517   8
  -7   0  -5 1.16311 3.22340   3
  -7   0  -5 -3.2651 3.19379  10
  -8   0  -5 4.90261 4.03137  10
  -8   0  -5 2.32568 3.78878   3
  -9   0  -5 0.80134 3.45944   3
 -10   0  -5 6.17793 6.77534   3
  11   0   5 -3.3151 2.17684   6
 -11   0  -5 -0.9705 2.75031   3
  12   1  -5 24.1256 4.18138   4
  11  -1  -5 48.6522 5.41610   6
  11  -1  -5 65.5155 6.06523   4
 -11  -1   5 64.5540 6.23545   9
  11   1  -5 52.8083 8.39321   4
  10  -1  -5 36.5151 5.68682   4
  10  -1  -5 36.6610 4.72472   6
  10   1  -5 44.8131 6.32687   4
  10   1  -5 36.2190 4.72262   6
   9  -1  -5 18.1938 3.59260   6
   9  -1  -5 12.9205 4.32868   4
   9   1  -5 13.3792 3.13367   6
  -8  -1   5 19.9280 3.28799   8
   8  -1  -5 17.6078 4.24446   4
   8  -1  -5 20.6085 3.52417   6
  -8   1   5 33.0921 4.38295   8
  -8   1   5 19.4260 4.24056   3
  -7  -1   5 180.101 10.7246   8
   7  -1  -5 187.365 11.0123   6
  -7   1   5 193.584 11.7889   3
  -7   1   5 164.430 11.1317   8
   6  -1  -5 92.3674 6.30617   6
  -6  -1   5 92.0626 6.31405   8
   6  -1  -5 87.8978 7.13885   4
  -6   1   5 94.6803 6.84545   3
  -6   1   5 96.7215 9.01222   8
   6   1  -5 87.8480 5.89169   8
  -5  -1   5 11.7099 2.42114   5
  -5  -1   5 12.5164 2.32237   8
   5  -1  -5 13.2691 3.05476   4
  -5   1   5 10.2426 2.46328   8
   5   1  -5 8.78081 1.83566   8
  -5   1   5 17.0531 2.86288   3
  -5   1   5 9.10226 2.52217   5
  -4  -1   5 280.399 15.3951   5
   4  -1  -5 275.924 15.4097   8
  -4  -1   5 292.428 15.2118   8
  -4   1   5 297.661 15.5831   8
   4   1  -5 287.094 15.0265   8
  -3  -1   5 1037.05 52.0484   5
  -3  -1   5 1109.25 52.2738   8
   3  -1  -5 1030.50 52.4419   8
   3   1  -5 1024.95 52.1153   8
  -3   1   5 1116.98 52.6096   8
   2  -1  -5 16.9537 2.44599   8
  -2  -1   5 17.2371 1.61984   5
  -2   1   5 19.1322 2.57847   8
   2   1  -5 14.9538 3.30891   8
   1  -1  -5 1644.83 81.8942   8
  -1   1   5 1737.34 81.5238   5
   1   1  -5 1639.46 81.7587   8
  -1   1   5 1707.09 81.8713   8
   0  -1  -5 4989.77 241.526   1
   1  -1   5 990.024 52.8675   5
  -1  -1  -5 1059.42 52.8677  10
  -1  -1  -5 1152.61 52.9488   5
  -1  -1  -5 1117.78 52.7677   8
  -1   1  -5 1034.03 52.7031   5
   1   1   5 1109.23 53.1197   5
   2  -1   5 748.008 43.6370   5
  -2  -1  -5 855.442 42.6706  10
  -2  -1  -5 895.181 42.7722   5
  -2   1  -5 857.799 42.7357   5
  -2   1  -5 861.535 42.7010  10
   2   1   5 919.481 43.1891   5
  -3  -1  -5 293.502 15.7782  10
  -3  -1  -5 281.616 15.7266   5
   3   1   5 289.117 16.3707   5
  -3   1  -5 292.458 15.7697  10
  -3   1  -5 273.058 15.8275   5
  -4  -1  -5 1239.79 59.4844   8
  -4  -1  -5 1172.96 60.0225   3
  -4  -1  -5 1232.95 60.5646  10
  -4   1  -5 1224.75 60.4477  10
   4   1   5 1130.25 61.0404   5
  -4   1  -5 1268.52 60.0669   8
  -5  -1  -5 263.121 15.1451   3
  -5  -1  -5 277.871 15.7006  10
  -5  -1  -5 262.216 14.2274   8
   5   1   5 249.840 16.2537   5
  -5   1  -5 256.929 15.5033  10
  -5   1  -5 271.068 15.0053   8
  -6  -1  -5 14.6346 2.56209   8
  -6  -1  -5 14.2949 3.58578   3
  -6   1  -5 12.4596 3.69156  10
  -6   1  -5 14.9612 3.02754   8
  -6   1  -5 13.6382 3.73333   3
  -7  -1  -5 115.315 9.08195   3
  -7  -1  -5 126.663 9.23431   8
  -7  -1  -5 112.603 9.85609  10
  -7   1  -5 121.842 9.83415  10
  -7   1  -5 107.802 8.20546   8
  -7   1  -5 105.603 9.35355   3
  -8  -1  -5 7.51362 4.13819  10
  -8  -1  -5 4.87924 3.78319   3
  -8   1  -5 4.12221 4.10754  10
  -8   1  -5 7.22629 3.97661   3
  -9  -1  -5 21.3733 5.09455   3
  -9   1  -5 18.4761 4.67828  10
  -9   1  -5 15.3090 4.61499   3
  10  -1   5 12.5120 5.91646   6
 -10  -1  -5 11.6931 4.23534   3
 -10   1  -5 9.92989 5.55585   3
  11  -1   5 8.21339 2.95415   6
 -11   1  -5 12.3419 3.85336   3
  11   1   5 11.7382 3.24578   6
  12  -2  -5 21.0582 2.91042   6
 -12  -2   5 17.2126 2.44922   9
  12   2  -5 19.7228 4.71887   4
  11  -2  -5 0.86333 2.67395   6
 -11  -2   5 3.78815 2.18789   9
  11   2  -5 2.41691 3.05675   4
  10  -2  -5 -0.4182 2.54780   6
  10  -2  -5 5.04113 3.56753   4
 -10  -2   5 -0.4554 2.26228   9
  10   2  -5 -0.9805 2.25286   6
  10   2  -5 4.96434 3.80805   4
   9  -2  -5 8.27404 3.50172   4
  -9   2   5 5.19526 3.52552   3
   8  -2  -5 71.9409 7.28830   4
   8  -2  -5 68.1769 6.50252   6
  -8   2   5 82.9015 7.27587   3
   7  -2  -5 37.7608 6.45266   4
  -7  -2   5 44.4552 3.89301   8
   7  -2  -5 44.9195 4.90516   6
  -7   2   5 39.3402 4.88951   8
  -7   2   5 50.2830 5.36449   3
   6  -2  -5 1.25999 1.96889   6
  -6  -2   5 2.39341 1.42594   8
   6  -2  -5 8.17669 3.03080   4
  -6   2   5 5.29387 2.50818   3
   6   2  -5 5.84025 1.44098   8
  -6   2   5 2.87337 2.41064   8
  -5  -2   5 39.0970 3.74512   5
   5  -2  -5 35.7076 5.39489   6
  -5  -2   5 33.2581 3.22575   8
   5  -2  -5 35.8406 4.60680   4
  -5   2   5 32.4853 3.64385   3
   5   2  -5 30.5402 2.91534   8
  -5   2   5 33.9611 4.23562   8
  -4  -2   5 269.391 14.2761   9
   4  -2  -5 268.406 15.3169   8
  -4  -2   5 291.489 14.8133   5
   4  -2  -5 274.647 15.8885   4
  -4   2   5 295.266 15.5871   8
   4   2  -5 284.024 14.5345   8
  -3  -2   5 532.067 25.6720   5
   3  -2  -5 504.732 26.5952   8
   3   2  -5 496.927 26.1171   8
  -3   2   5 547.719 26.7653   8
   2  -2  -5 3.92154 1.57810   8
  -2   2   5 5.87599 1.91003   8
   1  -2  -5 10.6009 1.97897   8
  -1   2   5 7.88033 1.67175   5
  -1   2   5 9.60597 1.92478   8
   0  -2  -5 463.002 22.3143   5
   0   2  -5 416.562 21.7054   5
   0   2   5 440.151 22.1754   8
  -1  -2  -5 163.554 8.92852   5
  -1  -2  -5 154.024 8.47497   8
  -1  -2  -5 141.630 8.50352  10
   1   2   5 164.230 9.25225   5
  -1   2  -5 149.682 8.68297   5
  -2  -2  -5 1202.86 57.1122   8
  -2  -2  -5 1212.99 57.8685   5
  -2  -2  -5 1137.17 57.6367  10
   2   2   5 1204.49 58.2038   5
  -2   2  -5 1088.15 57.7829   5
  -3  -2  -5 174.061 9.47184   8
  -3  -2  -5 164.076 10.3664  10
  -3  -2  -5 176.078 10.5561   5
  -3   2  -5 181.666 10.3956   8
   3   2   5 176.047 11.1321   5
  -3   2  -5 172.455 10.4564  10
  -4  -2  -5 32.3515 2.87536   8
  -4  -2  -5 32.3740 4.35581  10
  -4  -2  -5 33.4012 2.83031   8
  -4   2  -5 35.3564 4.15820   8
   4   2   5 40.6300 6.85061   5
  -4   2  -5 30.5366 4.19121  10
  -5  -2  -5 316.012 17.6541   3
  -5  -2  -5 347.283 18.5360  10
   5  -2   5 296.253 16.2265   2
  -5  -2  -5 316.420 16.4051   8
  -5   2  -5 339.218 17.9554   8
   5   2   5 288.533 18.7112   5
  -5   2  -5 331.549 18.1716  10
  -6  -2  -5 52.0190 5.72492   3
  -6  -2  -5 49.9165 3.89349   8
  -6  -2  -5 55.7913 6.45433  10
   6   2   5 49.4718 6.52823   5
  -6   2  -5 57.4672 5.41291   8
  -6   2  -5 50.2353 6.37516   3
  -6   2  -5 44.6572 8.59351  10
  -7  -2  -5 15.1460 4.40292  10
  -7  -2  -5 19.5545 4.05385   3
  -7   2  -5 10.9866 3.90141  10
  -7   2  -5 16.7001 4.33489   3
  -8  -2  -5 2.96099 3.83679   3
  -8   2  -5 3.03917 3.71233   3
  -8   2  -5 7.08272 3.98924  10
  -9  -2  -5 2.21273 3.49643   3
   9  -2   5 0.96090 3.54639   6
  -9   2  -5 1.17376 3.04776  10
  -9   2  -5 -3.5241 3.36370   3
 -10  -2  -5 12.8334 3.68920   3
  10  -2   5 14.0201 3.81855   6
 -10   2  -5 11.7889 4.01166   3
  11  -2   5 5.43535 3.08518   6
 -11  -2  -5 -1.7510 1.52402   9
 -11   2  -5 -1.0298 2.40035   3
 -12  -3   5 3.67940 1.79892   9
  12  -3  -5 -0.5746 2.05339   6
  12   3  -5 -1.1651 2.08321   4
  11  -3  -5 -0.7924 2.41255   6
 -11  -3   5 1.14865 2.26075   9
  11   3  -5 1.36876 2.99907   4
 -10  -3   5 4.51124 2.52459   9
  10  -3  -5 4.60380 2.88469   6
  10   3  -5 3.32117 3.75018   4
   9  -3  -5 8.20877 4.38445   4
   9  -3  -5 13.9312 3.74687   6
  -9  -3   5 15.9932 3.02115   9
  -9   3   5 14.8011 3.96549   3
   8  -3  -5 19.2132 4.04439   4
   8  -3  -5 7.91385 3.23937   6
  -8  -3   5 13.6172 2.87613   9
  -8   3   5 14.1445 3.61604   3
  -7  -3   5 4.38875 2.08414   9
   7  -3  -5 4.24827 2.72104   6
   7  -3  -5 1.17487 2.94696   4
  -7   3   5 2.68219 2.56568   8
  -7   3   5 4.40983 2.77452   3
  -6  -3   5 302.168 15.8756   9
   6  -3  -5 310.132 17.7642   4
   6  -3  -5 310.526 17.0033   6
  -6   3   5 292.190 16.6935   3
  -6   3   5 303.536 17.3123   8
   5  -3  -5 1396.47 68.3905   6
   5  -3  -5 1408.18 69.1386   4
  -5  -3   5 1317.11 67.6925   5
  -5  -3   5 1455.18 67.3456   9
  -5   3   5 1302.72 67.8886   3
   5   3  -5 1344.85 66.9094   8
  -5   3   5 1447.84 68.7936   8
  -4  -3   5 2939.26 146.222   9
   4  -3  -5 3161.75 148.200   4
   4  -3  -5 3011.74 147.988   6
  -4  -3   5 3047.44 146.389   5
  -4   3   5 3068.95 147.547   8
   4   3  -5 2953.95 146.109   8
   3  -3  -5 236.244 13.2778   8
  -3  -3   5 229.500 12.2313   9
   3  -3  -5 235.668 13.8031   4
   3  -3  -5 230.128 13.1349   6
  -3  -3   5 257.136 12.1017   5
  -3   3   5 256.122 13.5197   8
   3   3  -5 240.010 12.3498   8
   3   3  -5 216.641 12.3537   5
   2  -3  -5 1644.00 84.0556   8
  -2   3   5 1865.14 84.1727   5
   2   3  -5 1654.01 83.0746   5
  -2   3   5 1759.92 84.2217   8
   2   3  -5 1679.11 83.5607   8
   1  -3  -5 1316.29 68.1307   8
  -1   3   5 1439.57 68.3502   5
   1   3  -5 1416.78 67.2995   5
  -1   3   5 1399.39 68.2676   8
   0  -3  -5 63.6373 4.22130   8
   0   3   5 60.0672 4.27535   8
   0   3   5 60.1610 4.69567   5
  -1  -3  -5 230.629 13.7322   6
   1  -3   5 254.407 13.0956   2
  -1  -3  -5 241.333 12.5205   8
  -1  -3  -5 222.933 12.5873  10
   1  -3   5 237.666 12.4927   9
  -1   3  -5 223.695 12.9992   5
   1   3   5 275.170 13.7011   5
  -2  -3  -5 439.834 22.7550  10
   2  -3   5 423.223 22.1613   9
   2  -3   5 428.270 22.2592   2
   2  -3   5 441.969 22.9250   6
  -2  -3  -5 469.376 24.3294   6
  -2  -3  -5 436.860 21.9622   8
  -2  -3  -5 456.705 23.1030   5
  -2   3  -5 403.602 23.0716   5
   2   3   5 475.009 23.6325   5
   3  -3   5 288.228 15.7926   6
  -3  -3  -5 279.957 14.3401   8
  -3   3  -5 304.734 15.9332   8
  -3   3  -5 291.843 15.8021  10
  -3   3  -5 256.248 16.0953   5
   3   3   5 292.047 16.5821   5
  -4  -3  -5 118.123 6.22049   8
  -4  -3  -5 122.856 6.30578   8
  -4  -3  -5 129.298 8.56287  10
  -4  -3  -5 112.822 7.69050   3
   4  -3   5 114.032 7.11967   2
   4  -3   5 120.193 8.55819   6
  -4   3  -5 125.052 8.37789  10
   4   3   5 121.972 9.05499   5
  -4   3  -5 129.750 8.50196   8
   5  -3   5 67.6119 6.39124   6
  -5  -3  -5 65.3121 6.42720  10
  -5  -3  -5 60.0122 5.32945   3
   5  -3   5 58.4550 4.45711   2
  -5   3  -5 63.3301 5.83292   8
  -5   3  -5 52.7310 5.83954  10
   5   3   5 52.9592 6.42606   5
  -6  -3  -5 242.654 14.4379  10
   6  -3   5 178.021 13.0283   2
   6  -3   5 231.165 14.2156   6
  -6  -3  -5 220.488 13.3723   3
  -6   3  -5 223.460 13.8195  10
  -6   3  -5 238.119 14.1123   3
  -6   3  -5 219.714 13.8031   8
   7  -3   5 3.41929 3.48904   6
  -7  -3  -5 7.35455 3.42910   3
  -7   3  -5 3.35221 3.64912   3
  -7   3  -5 6.66266 3.49967  10
   8  -3   5 134.404 10.9498   6
  -8  -3  -5 150.066 10.6052   3
  -8   3  -5 143.674 10.8828  10
  -8   3  -5 166.253 11.3316   3
   9  -3   5 95.5224 8.91164   6
  -9   3  -5 103.993 8.30810  10
  -9   3  -5 102.059 9.19907   3
  10  -3   5 22.3718 4.67775   6
 -10  -3  -5 18.2785 2.87905   9
 -10   3  -5 22.4456 4.74764   3
  11  -3   5 2.46009 2.61838   6
 -11  -3  -5 2.47172 2.33659   9
 -11   3  -5 4.15320 2.67692   3
  12  -4  -5 -0.1279 2.27439   6
 -12  -4   5 5.37506 1.67542   9
  12   4  -5 5.67157 2.53698   4
 -11  -4   5 -0.0286 1.96338   9
  11  -4  -5 -0.4137 2.37019   6
  11   4  -5 2.20092 3.10864   4
 -10  -4   5 48.7469 4.84601   9
  10  -4  -5 38.1520 5.04450   6
  -9  -4   5 2.70669 2.39198   9
   9  -4  -5 7.27765 3.35539   6
  -8  -4   5 0.78268 2.33529   9
  -8   4   5 0.95563 2.44843   3
   7  -4  -5 44.5885 5.71419   6
  -7  -4   5 45.7662 4.49912   9
  -7   4   5 41.9668 4.95529   3
  -6  -4   5 5.15694 2.13131   9
   6  -4  -5 4.32054 2.63110   6
  -6   4   5 1.66879 2.05260   3
  -6   4   5 5.79532 2.58300   8
  -5  -4   5 -0.8438 1.49097   9
   5  -4  -5 -0.2203 2.09996   6
  -5   4   5 3.50636 1.81642   3
  -5   4   5 2.62214 2.25083   8
   4  -4  -5 273.230 15.0856   6
  -4  -4   5 253.278 13.9447   2
  -4  -4   5 273.664 13.7273   5
  -4  -4   5 273.853 13.8526   9
   4   4  -5 240.497 14.1600   5
  -4   4   5 277.438 15.2465   8
   4   4  -5 259.726 12.9292   8
  -3  -4   5 9.66770 1.70583   2
  -3  -4   5 8.79603 1.74909   9
   3  -4  -5 11.5341 2.50234   6
  -3   4   5 7.57924 2.33996   8
   3   4  -5 8.74348 1.31379   8
   3   4  -5 9.51930 1.72057   5
  -2  -4   5 7.45643 1.53191   9
   2  -4  -5 9.11916 2.04403   8
  -2  -4   5 8.68268 1.77085   2
   2  -4  -5 5.98408 2.07937   6
  -2   4   5 5.30696 2.07982   8
   2   4  -5 8.13105 1.51466   8
   2   4  -5 9.88192 1.48714   5
  -2   4   5 10.9751 2.32641   5
  -1  -4   5 24.3534 3.01457   2
   1  -4  -5 30.3902 4.11708   6
  -1  -4   5 23.9011 2.22319   9
   1  -4  -5 21.0670 2.69417   8
   1   4  -5 24.5046 2.22422   5
  -1   4   5 25.0122 3.11105   8
  -1   4   5 26.2031 3.37497   5
   0  -4  -5 447.746 24.1292   8
   0  -4   5 449.437 23.7666   9
   0  -4  -5 465.690 24.9242   6
   0  -4   5 463.436 24.2597   2
   0   4   5 519.455 25.1019   5
   0   4   5 490.789 24.2984   8
   0   4  -5 517.461 23.9331   5
   1  -4   5 1793.37 89.4295   9
   1  -4   5 1823.35 89.9156   2
   1  -4   5 1756.77 90.2925   6
  -1  -4  -5 1845.74 90.6027   6
  -1   4  -5 1961.94 90.4870   8
   1   4   5 1903.72 90.8451   5
   2  -4   5 388.484 19.6164   9
  -2  -4  -5 383.555 19.1611   8
   2  -4   5 381.239 20.0614   2
   2  -4   5 377.115 20.6615   6
  -2  -4  -5 403.909 20.8554   6
  -2  -4  -5 372.203 19.3821   9
  -2   4  -5 416.046 20.8916   8
   2   4   5 397.595 21.3167   5
  -3  -4  -5 267.602 15.1058   6
  -3  -4  -5 259.786 13.7838   9
   3  -4   5 269.074 15.3796   6
   3  -4   5 270.721 13.9754   9
   3  -4   5 265.585 14.4494   2
   3   4   5 272.566 15.9855   5
  -3   4  -5 266.649 15.0539  10
  -3   4  -5 284.031 15.4743   8
  -4  -4  -5 49.2846 3.67982   9
  -4  -4  -5 45.4150 4.43595   3
   4  -4   5 49.9325 5.59336   6
   4  -4   5 45.0656 4.17640   2
  -4   4  -5 48.4689 4.87782  10
  -4   4  -5 46.7318 5.27932   8
   4   4   5 55.3688 6.08889   5
   5  -4   5 127.549 9.26382   6
  -5  -4  -5 110.585 7.75045   3
  -5   4  -5 124.381 8.93585   8
   5   4   5 111.338 9.44507   5
  -5   4  -5 121.135 8.51567  10
  -6  -4  -5 196.997 12.0033   3
   6  -4   5 215.849 13.5339   6
   6  -4   5 194.314 11.0456   2
  -6   4  -5 192.970 12.5103  10
  -6   4  -5 197.354 12.8745   3
   7  -4   5 -1.6896 3.17867   6
  -7  -4  -5 -0.4928 2.17330   9
  -7   4  -5 4.44559 2.89870  10
  -7   4  -5 -3.1604 2.99485   3
  -8  -4  -5 7.39955 2.75448   9
   8  -4   5 5.53988 3.86147   6
  -8   4  -5 10.5038 3.16241  10
  -8   4  -5 8.83037 4.24989   3
   9  -4   5 2.51759 3.41416   6
  -9  -4  -5 0.61678 2.10715   9
  -9   4  -5 3.45401 3.57698   3
  10  -4   5 3.84690 3.52172   6
 -10  -4  -5 3.57146 1.90610   9
 -10   4  -5 8.73359 3.56764   3
  11  -5  -5 12.8495 3.82532   6
 -11  -5   5 13.8155 2.48421   9
  11   5  -5 15.7458 4.04458   4
  10  -5  -5 24.6772 4.07594   6
 -10  -5   5 23.2218 3.15729   9
   9  -5  -5 31.1422 4.89323   6
  -8  -5   5 42.6291 4.71260   9
   8  -5  -5 46.0353 5.94770   6
   7  -5  -5 79.1292 7.38834   6
  -7   5   5 72.6720 5.99921   3
  -6  -5   5 4.73973 2.30968   9
   6  -5  -5 9.61650 3.44234   6
  -6   5   5 10.7679 3.37136   3
   5  -5  -5 10.9091 3.26113   6
  -5  -5   5 9.87356 2.22400   9
  -5   5   5 11.2061 3.32668   8
   5   5  -5 7.58156 2.07856   5
  -4  -5   5 14.5609 2.14990   2
  -4  -5   5 13.5557 2.32603   9
   4  -5  -5 24.9681 3.94659   6
  -4   5   5 10.6934 2.86985   8
   4   5  -5 13.5035 2.26881   5
  -3  -5   5 708.950 34.0917   9
   3  -5  -5 693.026 35.5850   6
  -3  -5   5 640.780 34.3842   6
  -3  -5   5 697.905 34.3558   2
   3   5  -5 644.994 35.8396   5
   3   5  -5 718.346 33.4918   8
  -3   5   5 744.310 35.5631   5
  -3   5   5 696.837 35.4094   8
   3   5  -5 640.177 33.4373   8
   2  -5  -5 227.579 13.2917   6
  -2  -5   5 214.014 12.2724   6
  -2  -5   5 218.452 11.8225   9
  -2  -5   5 218.509 12.1538   2
   2   5  -5 206.344 11.7886   8
  -2   5   5 237.030 13.1553   5
   2   5  -5 228.068 11.9362   8
  -2   5   5 222.678 12.8254   8
   2   5  -5 236.954 12.0467   5
  -1  -5   5 8.07348 1.72861   9
   1  -5  -5 6.34529 2.45878   6
   1  -5  -5 7.34055 1.77958   8
  -1  -5   5 2.64045 1.77156   6
  -1  -5   5 5.52697 1.91788   2
   1   5  -5 7.47237 1.72972   8
   1   5  -5 5.10289 1.66088   5
  -1   5   5 6.59619 2.23488   5
  -1   5   5 6.45111 1.92157   8
   0  -5  -5 20.2504 3.42647   6
   0  -5  -5 16.1363 2.15982   8
   0  -5   5 17.5937 2.65435   2
   0  -5   5 20.0938 2.27859   9
   0  -5   5 19.1138 2.68537   6
   0   5   5 18.6407 3.14208   5
   0   5   5 17.6828 2.47498   8
   0   5  -5 15.5602 2.22730   5
   0   5  -5 22.7986 2.91083   8
   1  -5   5 220.535 11.5726   9
   1  -5   5 224.727 12.2278   2
  -1  -5  -5 209.604 11.3456   8
  -1  -5  -5 215.120 11.2285   9
   1  -5   5 213.523 12.5923   6
  -1  -5  -5 226.308 12.9350   6
   1   5   5 215.414 13.1066   5
  -1   5  -5 218.912 12.5366   8
  -1   5  -5 227.243 11.8972   5
  -2  -5  -5 341.704 18.5966   6
   2  -5   5 335.286 18.5156   6
  -2  -5  -5 327.736 16.9228   9
   2  -5   5 340.307 17.2316   9
   2  -5   5 334.240 17.8079   2
  -2   5  -5 353.770 18.5494   8
   2   5   5 319.506 18.8559   5
  -3  -5  -5 209.555 11.4005   9
   3  -5   5 226.958 13.4081   6
   3  -5   5 217.873 12.3025   2
  -3  -5  -5 224.055 12.9348   6
   3  -5   5 220.762 11.6572   9
  -3   5  -5 219.311 13.1622   8
  -3   5  -5 216.435 12.6168  10
   3   5   5 207.475 13.5923   5
   4  -5   5 66.1315 5.34467   2
   4  -5   5 65.7939 6.54063   6
  -4  -5  -5 59.4459 4.32130   9
  -4   5  -5 59.9475 6.15884   8
   4   5   5 55.6963 6.59915   5
  -4   5  -5 61.8253 5.41733  10
   5  -5   5 52.4654 6.37551   6
   5  -5   5 47.0826 4.65172   2
  -5  -5  -5 45.7289 4.07825   9
  -5   5  -5 46.1652 8.16654  10
   6  -5   5 10.8490 2.57903   2
  -6  -5  -5 12.9987 2.60623   9
   6  -5   5 10.7031 4.23771   6
  -6   5  -5 10.3868 5.11844   3
  -6   5  -5 6.65642 2.65404  10
   7  -5   5 114.451 9.65394   6
  -7  -5  -5 112.067 7.19047   9
  -7   5  -5 105.800 8.97939   3
  -7   5  -5 105.719 8.09685  10
   8  -5   5 43.3869 6.17804   6
  -8  -5  -5 28.4851 3.41923   9
  -8   5  -5 40.6908 4.75996  10
  -8   5  -5 26.6585 4.70120   3
   9  -5   5 16.1255 4.10128   6
  -9  -5  -5 7.33597 2.31995   9
  -9   5  -5 14.7425 4.05181   3
 -10  -5  -5 4.84430 1.70892   9
  10  -5   5 4.22726 2.72890   6
 -10   5  -5 3.44695 2.62068   3
  11  -6  -5 1.73774 1.74420   6
 -11  -6   5 -0.6094 1.39445   9
  11   6  -5 -3.0110 2.34012   4
 -10  -6   5 12.3845 2.64933   9
  10  -6  -5 6.58782 2.71353   6
   9  -6  -5 9.30686 4.82748   6
  -9  -6   5 13.3162 3.47182   9
  -8  -6   5 14.8315 3.17560   9
   8  -6  -5 20.6035 4.56812   6
   7  -6  -5 14.1758 4.09700   6
  -7  -6   5 15.4546 3.01344   9
   6  -6  -5 5.25833 3.84240   6
  -6  -6   5 1.92014 3.13598   9
  -5  -6   5 32.1869 3.68632   2
   5  -6  -5 41.0095 5.72670   6
  -5  -6   5 38.5812 3.91819   9
  -4  -6   5 13.1554 2.44514   2
   4  -6  -5 15.1455 3.89102   6
  -4  -6   5 16.7855 2.67389   9
  -4   6   5 10.0910 2.57713   5
  -3  -6   5 227.206 11.8612   9
  -3  -6   5 215.877 12.1282   2
  -3  -6   5 206.957 12.1383   6
   3  -6  -5 243.665 13.8955   6
   3   6  -5 199.869 12.0029   5
  -2  -6   5 43.1867 3.90949   9
  -2  -6   5 41.1112 4.21309   6
  -2  -6   5 46.4428 4.47065   2
   2  -6  -5 49.8263 5.55626   6
   2  -6  -5 45.2428 3.14135   9
   2   6  -5 45.6139 3.83944   5
  -2   6   5 47.2997 5.28936   5
  -2   6   5 42.2125 4.51036   8
   2   6  -5 46.3905 3.36209   8
   1  -6  -5 16.5300 1.68039   9
  -1  -6   5 16.6080 2.68751   6
   1  -6  -5 13.4326 3.40111   6
  -1  -6   5 14.4839 2.24671   9
  -1  -6   5 16.7584 2.96859   2
  -1   6   5 14.4570 2.51378   8
   1   6  -5 12.5783 2.10205   5
  -1   6   5 18.2878 3.27609   5
   1   6  -5 15.5206 2.27183   8
   0  -6   5 99.7290 7.12315   6
   0  -6  -5 109.742 7.95506   6
   0  -6   5 99.9627 6.15801   9
   0  -6   5 105.414 6.92579   2
   0  -6  -5 100.828 5.58147   9
   0   6  -5 92.2727 6.60576   8
   0   6   5 94.9232 6.21507   8
   0   6   5 92.6012 7.42551   5
   0   6  -5 97.3138 6.28535   5
  -1  -6  -5 61.2625 5.78144   6
   1  -6   5 62.6925 4.51134   9
   1  -6   5 64.4925 5.59539   2
   1  -6   5 52.5840 6.72866   6
  -1  -6  -5 62.8597 3.90325   9
  -1   6  -5 61.7480 5.17441   8
   1   6   5 56.4574 5.85755   5
  -1   6  -5 61.0434 4.69211   5
   2  -6   5 57.4443 4.39839   9
   2  -6   5 58.9142 5.49435   2
  -2  -6  -5 55.5820 3.79849   9
  -2  -6  -5 59.4528 5.80660   6
   2  -6   5 54.5781 5.63540   6
   2   6   5 57.0246 5.96593   5
  -2   6  -5 54.7878 4.53825   5
  -2   6  -5 53.6692 4.77116  10
  -2   6  -5 49.9800 5.13018   8
   3  -6   5 1.72342 2.23307   2
  -3  -6  -5 -0.6149 1.32578   9
  -3  -6  -5 0.40984 2.35092   6
   3  -6   5 3.40391 1.90807   9
   3  -6   5 1.42286 2.46316   6
  -3   6  -5 2.19067 2.00719   8
   3   6   5 0.18033 2.14692   5
  -3   6  -5 3.02650 1.98263  10
   4  -6   5 43.2676 4.76014   2
   4  -6   5 35.1678 5.41069   6
  -4  -6  -5 33.6783 3.39238   9
  -4   6  -5 30.6966 3.98785  10
   5  -6   5 7.82868 4.32466   6
  -5  -6  -5 12.7541 2.36857   9
   5  -6   5 11.9157 2.95764   2
  -5   6  -5 8.57057 2.37979  10
  -5   6  -5 15.6639 3.76572   3
   6  -6   5 -2.2814 1.78205   2
   6  -6   5 -1.0849 3.20318   6
  -6  -6  -5 0.55869 1.87550   9
  -6   6  -5 0.12305 2.89480   3
  -6   6  -5 1.51721 2.40213  10
   7  -6   5 5.04273 3.51106   6
  -7  -6  -5 -0.1577 1.89091   9
   7  -6   5 3.73981 1.99696   2
  -7   6  -5 2.47534 2.99810   3
   8  -6   5 0.85470 4.81152   6
  -8  -6  -5 -1.4471 1.80807   9
  -8   6  -5 5.85059 3.09794   3
   9  -6   5 2.23736 3.39167   6
  -9  -6  -5 -0.8772 1.54188   9
  -9   6  -5 4.92239 2.73724   3
 -10  -7   5 12.6648 2.26712   9
  10  -7  -5 8.65650 2.63598   6
   9  -7  -5 -1.3522 2.21696   6
  -9  -7   5 1.46888 1.97401   9
   8  -7  -5 12.0568 4.00578   6
  -8  -7   5 15.8953 2.77273   9
   7  -7  -5 20.5852 4.50182   6
  -7  -7   5 21.5541 3.25860   9
  -6  -7   5 252.977 14.0324   9
   6  -7  -5 254.512 15.9212   6
  -5  -7   5 445.106 25.3742   2
   5  -7  -5 538.070 27.9506   6
  -5  -7   5 533.561 25.7706   9
   4  -7  -5 16.2695 4.37379   6
  -4  -7   5 20.8874 3.10714   9
  -4  -7   5 14.8641 2.66735   2
  -3  -7   5 64.6606 5.25550   9
   3  -7  -5 69.2182 7.10862   6
  -3  -7   5 67.3774 5.38962   6
  -3  -7   5 70.5748 5.69948   2
  -3   7   5 67.6168 6.29793   8
   2  -7  -5 3.35724 3.40443   6
  -2  -7   5 10.4460 2.72587   2
  -2  -7   5 7.18809 2.19218   9
  -2  -7   5 4.66770 2.14882   6
  -2   7   5 5.14308 2.33818   8
  -1  -7   5 960.852 46.5890   9
  -1  -7   5 978.296 47.3980   2
  -1  -7   5 942.803 47.6526   6
   1  -7  -5 929.662 46.0864   9
   1  -7  -5 1010.47 48.7082   6
  -1   7   5 849.074 47.1291   8
   0  -7   5 243.737 13.6749   2
   0  -7  -5 237.481 14.6253   6
   0  -7   5 225.187 13.8068   6
   0  -7   5 253.963 12.8242   9
   0   7  -5 227.216 13.0808   5
   0   7  -5 225.396 13.2658   8
  -1  -7  -5 385.594 19.4506   9
   1  -7   5 395.009 21.4875   6
  -1  -7  -5 389.469 21.5918   6
   1  -7   5 405.986 20.8984   2
   1  -7   5 399.164 19.9604   9
  -1   7  -5 367.228 20.4017   5
  -1   7  -5 365.604 21.0499   8
  -2  -7  -5 543.032 28.0562   6
  -2  -7  -5 512.880 25.8622   9
   2  -7   5 538.282 26.3048   9
   2  -7   5 550.459 27.3085   2
   2  -7   5 536.994 28.1205   6
  -2   7  -5 473.875 26.8647   5
  -2   7  -5 489.681 26.6457  10
   3  -7   5 465.900 23.6086   9
   3  -7   5 453.768 25.5988   6
  -3  -7  -5 457.826 23.2691   9
   3  -7   5 486.653 24.6509   2
  -3  -7  -5 448.740 25.0218   6
  -4  -7  -5 4.56595 1.71508   9
   4  -7   5 2.42030 3.29617   6
   4  -7   5 2.85669 2.81170   2
  -5  -7  -5 4.55093 1.85145   9
   5  -7   5 6.48706 3.89489   6
   5  -7   5 4.17899 2.53724   2
  -5   7  -5 12.3936 3.26502   3
   6  -7   5 12.9790 3.00491   2
   6  -7   5 17.5511 4.49105   6
  -6  -7  -5 26.8805 2.98197   9
  -6   7  -5 23.9376 4.01501   3
   7  -7   5 77.8882 9.94528   6
  -7  -7  -5 74.7615 5.44799   9
  -7   7  -5 93.9436 7.00804   3
  -8  -7  -5 54.3547 4.02949   9
   8  -7   5 58.2118 6.42379   6
  -8   7  -5 48.7912 5.06475   3
   9  -7   5 15.0946 3.88617   6
  -9  -7  -5 12.1530 1.72736   9
  -9   7  -5 14.8022 2.35532   3
  -9  -8   5 -2.7595 1.70712   9
   9  -8  -5 1.74129 2.54033   6
  -8  -8   5 1.94395 2.06065   9
   8  -8  -5 2.77138 2.96421   6
   7  -8  -5 1.61580 4.43647   6
  -6  -8   5 -0.4251 2.28972   9
   6  -8  -5 -0.7614 3.19447   6
  -5  -8   5 3.96423 2.43841   9
   5  -8  -5 2.01020 3.67353   6
  -4  -8   5 3.49052 2.08786   2
  -4  -8   5 5.56174 2.43774   9
   4  -8  -5 2.45348 3.67554   6
  -3  -8   5 42.5560 4.69668   6
   3  -8  -5 57.1296 6.91267   6
  -3  -8   5 54.1376 4.81801   9
  -3  -8   5 59.6197 5.29344   2
  -2  -8   5 3.03833 2.20272   9
   2  -8  -5 5.76526 3.79242   6
  -2  -8   5 2.55331 2.72751   2
  -2  -8   5 3.38589 2.30609   6
  -1  -8   5 11.0320 4.65543   2
  -1  -8   5 11.6184 2.71579   9
  -1  -8   5 14.2953 3.38494   6
   1  -8  -5 15.7324 4.13416   6
   1  -8  -5 16.0480 1.88705   9
   0  -8  -5 3.50463 3.46034   6
   0  -8   5 4.01989 2.69382   6
   0  -8   5 3.13341 2.82756   2
   0  -8   5 1.48805 1.96438   9
   0  -8  -5 -0.2322 1.20131   9
   1  -8   5 28.3516 5.97495   6
   1  -8   5 28.7454 4.22647   2
  -1  -8  -5 26.2745 2.82773   9
  -1  -8  -5 21.6757 4.40533   6
   1  -8   5 28.8781 3.38046   9
   2  -8   5 3.43779 2.88575   2
   2  -8   5 7.62774 3.64492   6
  -2  -8  -5 10.7584 3.68004   6
   2  -8   5 4.47588 2.21109   9
  -2  -8  -5 4.73030 1.63817   9
   3  -8   5 23.4597 3.87806   2
  -3  -8  -5 22.5680 4.19041   6
   3  -8   5 29.5573 5.01058   6
  -3  -8  -5 21.7386 2.55343   9
  -4  -8  -5 9.81137 1.93447   9
   4  -8   5 12.5691 4.45856   6
   4  -8   5 10.1637 3.17495   2
  -4   8  -5 6.00151 2.43339   3
   5  -8   5 4.45338 3.73692   6
  -5  -8  -5 6.73371 1.83667   9
   5  -8   5 4.00784 2.60954   2
  -5   8  -5 6.39020 2.62485   3
  -6  -8  -5 4.73076 1.79892   9
   6  -8   5 4.57764 2.20431   2
   6  -8   5 1.55334 3.41410   6
  -6   8  -5 4.51877 2.42698   3
  -7  -8  -5 3.80326 1.39911   9
   7  -8   5 1.37337 3.34028   6
   8  -8   5 5.02986 2.77546   6
  -8  -8  -5 4.12460 1.15566   9
  -8  -9   5 7.82404 1.99904   9
   8  -9  -5 7.40399 3.76658   6
  -7  -9   5 16.2549 2.76160   9
   7  -9  -5 11.4073 3.60400   6
  -6  -9   5 22.2182 3.17649   9
   6  -9  -5 9.06804 3.67391   6
   5  -9  -5 31.9254 5.28432   6
  -5  -9   5 34.9904 3.80362   9
  -4  -9   5 43.6255 4.17010   2
  -4  -9   5 45.0923 4.62212   9
   4  -9  -5 52.8254 6.86588   6
   3  -9  -5 6.24257 3.77715   6
  -3  -9   5 8.84801 2.42814   9
  -3  -9   5 12.2872 3.00094   2
  -3  -9   5 8.90910 2.27227   6
  -2  -9   5 25.3519 3.52896   6
  -2  -9   5 35.5033 4.52498   2
  -2  -9   5 30.3028 3.53740   9
   2  -9  -5 29.4792 5.16404   6
  -1  -9   5 66.3423 6.21928   2
  -1  -9   5 57.7158 5.78803   6
   1  -9  -5 65.2493 7.34141   6
  -1  -9   5 69.4314 5.29411   9
   0  -9   5 32.1549 4.46499   2
   0  -9  -5 27.2564 2.76207   9
   0  -9  -5 34.5274 5.25511   6
   0  -9   5 30.9802 4.30463   6
   0  -9   5 39.5853 3.83789   9
  -1  -9  -5 146.701 10.3486   6
   1  -9   5 132.498 9.67640   6
   1  -9   5 136.111 9.44262   2
  -1  -9  -5 123.646 7.38358   9
   1  -9   5 139.446 8.21985   9
  -2  -9  -5 28.5246 4.43716   6
   2  -9   5 27.5310 4.67107   6
  -2  -9  -5 28.0884 2.68691   9
   2  -9   5 24.0476 4.06888   2
   2  -9   5 35.7053 3.79440   9
   3  -9   5 1.58450 2.56069   2
   3  -9   5 3.75704 3.46534   6
  -3  -9  -5 3.69931 1.34833   9
   4  -9   5 1.12298 3.06459   2
   4  -9   5 -0.3268 4.01477   6
  -4  -9  -5 1.64882 1.43812   9
   5  -9   5 19.5370 3.07829   2
  -5  -9  -5 16.5915 2.04747   9
   5  -9   5 25.2342 4.37061   6
   6  -9   5 34.0157 4.68573   6
  -6  -9  -5 37.2430 2.91773   9
   7  -9   5 0.72524 2.33396   6
  -6 -10   5 11.8954 2.15209   9
   6 -10  -5 11.7470 2.95816   6
   5 -10  -5 2.02912 2.68296   6
  -5 -10   5 -2.3718 1.63758   9
   4 -10  -5 3.41544 3.00827   6
  -4 -10   5 -2.3106 1.71634   9
  -3 -10   5 2.07164 2.02973   9
   3 -10  -5 -2.2560 2.90907   6
  -2 -10   5 6.66902 2.12950   6
  -2 -10   5 11.6927 2.97372   2
   2 -10  -5 8.90397 5.07001   6
  -2 -10   5 5.54744 2.70371   9
  -1 -10   5 94.6189 7.08138   6
  -1 -10   5 116.468 8.32069   9
  -1 -10   5 93.6062 9.14501   2
   1 -10  -5 114.744 9.24202   6
   0 -10   5 65.2693 5.76987   6
   0 -10  -5 61.1197 7.74358   6
  -1 -10  -5 1.89894 3.67039   6
   1 -10   5 5.52048 2.18447   9
   1 -10   5 3.36036 2.39989   6
   1 -10   5 8.54127 4.18157   2
  -2 -10  -5 3.35367 2.74609   6
   2 -10   5 3.24055 2.56308   6
   2 -10   5 3.08601 2.53306   2
   3 -10   5 5.13447 2.37481   2
   3 -10   5 1.21180 2.38822   6
   4 -10   5 16.4749 3.19857   6
   4 -10   5 14.7623 2.89709   2
   5 -10   5 8.54346 3.51209   6
  -4 -11   5 3.49134 1.57828   9
   4 -11  -5 4.75302 2.82308   6
   3 -11  -5 49.2357 5.29960   6
  -3 -11   5 54.8959 3.95789   9
   2 -11  -5 87.4345 6.81349   6
  -2 -11   5 77.5856 5.22338   9
   1 -11  -5 11.9885 3.28598   6
  -1 -11   5 9.64173 1.93663   9
   0 -11  -5 28.6234 4.11519   6
   0 -11   5 26.4626 2.65862   9
   0 -11   5 21.0797 3.20541   2
   0 -11   5 27.6506 3.44538   6
   1 -11   5 21.7055 2.88285   2
  -1 -11  -5 15.5527 2.77449   6
   1 -11   5 22.2009 2.77336   6
   2 -11   5 18.8551 2.68117   2
   2 -11   5 17.1747 2.88605   6
   3 -11   5 10.1737 2.21370   6
 -12   0   6 28.6094 2.96060   9
  12   0  -6 28.3931 4.65535   4
  11   0  -6 238.286 17.2566   4
  10   0  -6 116.484 9.62434   4
  10   0  -6 108.515 7.83343   6
   9   0  -6 34.2090 6.77476   4
   9   0  -6 37.0760 4.66139   6
   8   0  -6 46.8043 6.17641   4
   8   0  -6 49.4817 5.06312   6
  -8   0   6 42.4947 4.84605   8
   7   0  -6 39.3335 5.65803   4
   7   0  -6 39.0351 4.01260   6
  -7   0   6 31.5824 4.42506   8
   6   0  -6 158.806 10.7977   4
   6   0  -6 158.471 9.35518   6
  -6   0   6 172.760 10.1490   8
   5   0  -6 330.367 18.2406   4
  -5   0   6 349.335 17.7708   8
  -5   0   6 306.419 18.0756   5
   5   0  -6 325.201 17.4774   8
   4   0  -6 18.1656 3.34003   4
  -4   0   6 19.5215 2.98559   5
   4   0  -6 19.4534 2.70628   8
  -4   0   6 22.0762 3.07920   8
   3   0  -6 53.6596 4.40074   8
  -3   0   6 62.5269 4.68140   8
  -2   0   6 1053.51 51.1139   8
   2   0  -6 1019.63 51.0163   8
   1   0  -6 1208.71 61.2096   8
  -1   0   6 1290.33 60.5976   5
   0   0  -6 93.0686 5.35897   5
   0   0  -6 96.0892 5.95152   8
   0   0   6 93.4882 5.62439   5
  -1   0  -6 1380.45 66.1934   5
   1   0   6 1329.15 66.4351   5
  -2   0  -6 2084.16 101.138  10
  -2   0  -6 2056.35 100.986   5
   2   0   6 2073.59 101.396   5
  -3   0  -6 2089.96 101.252   5
   3   0   6 2040.45 101.684   5
  -4   0  -6 416.437 21.0453   8
   4   0   6 370.682 22.2611   5
  -4   0  -6 414.149 21.8231  10
  -5   0  -6 68.2378 6.19512  10
  -5   0  -6 60.6369 5.83263   3
  -5   0  -6 59.9308 5.15309   8
  -6   0  -6 60.4602 6.78696  10
  -6   0  -6 58.7311 5.39060   8
  -6   0  -6 64.6853 6.52724   3
  -7   0  -6 225.016 14.9250   8
  -7   0  -6 284.647 16.8130  10
  -7   0  -6 283.708 16.2970   3
  -8   0  -6 269.912 16.9647  10
  -8   0  -6 255.461 16.3876   3
  -9   0  -6 1.63832 3.77706   3
  -9   0  -6 -1.2053 3.56083  10
 -10   0  -6 4.47989 3.93741   3
  11   0   6 4.78860 2.81384   6
 -11   0  -6 -1.1544 2.52278   3
 -12  -1   6 17.4708 2.49713   9
 -12   1   6 17.4267 2.28442   9
  12   1  -6 16.4471 3.44202   4
  11  -1  -6 8.31375 3.03297   4
 -11  -1   6 1.21283 3.22618   9
  11  -1  -6 10.0968 2.78594   6
  11   1  -6 2.74688 5.06365   4
  10  -1  -6 8.31350 2.81112   6
  10  -1  -6 10.9114 3.92590   4
  10   1  -6 4.49571 3.70936   4
  10   1  -6 1.90461 4.13638   6
   9  -1  -6 48.7528 5.27660   6
   9  -1  -6 38.6437 6.42310   4
   9   1  -6 34.9321 6.31869   4
   9   1  -6 49.0554 4.82607   6
   8  -1  -6 6.08622 2.71406   6
   8  -1  -6 3.77105 3.36407   4
  -8  -1   6 -4.9595 2.24146   8
   8   1  -6 1.04838 3.76336   4
  -8   1   6 2.31970 2.63883   8
  -7  -1   6 47.0346 7.12584   8
   7  -1  -6 43.9484 5.75395   4
   7  -1  -6 49.4279 4.74393   6
  -7   1   6 50.9804 5.04211   8
  -7   1   6 45.4928 5.43555   3
   6  -1  -6 50.6208 4.59097   6
  -6  -1   6 53.4983 4.87127   8
   6  -1  -6 58.1153 5.91731   4
  -6   1   6 54.5300 5.18535   3
  -6   1   6 61.0496 5.26718   8
  -5  -1   6 6.69933 2.24861   5
   5  -1  -6 7.80483 2.80539   4
  -5  -1   6 10.0222 2.21384   8
   5   1  -6 6.28600 1.71982   8
  -5   1   6 10.4057 2.59657   3
  -5   1   6 10.0826 2.59115   8
  -5   1   6 6.80885 2.50528   5
  -4  -1   6 286.858 14.7108   8
   4  -1  -6 266.319 15.4255   4
  -4  -1   6 254.997 14.5331   5
   4  -1  -6 271.839 14.8765   8
  -4   1   6 288.704 15.0877   8
   4   1  -6 266.749 14.4629   8
  -3  -1   6 208.634 11.3518   5
   3  -1  -6 214.804 12.0164   8
  -3  -1   6 217.157 12.5777   8
  -3   1   6 235.785 12.3132   8
   3   1  -6 209.622 11.7135   8
  -2  -1   6 2219.46 110.774   5
  -2  -1   6 2354.71 110.660   5
   2  -1  -6 2246.64 111.863   8
  -2   1   6 2440.41 112.010   8
   2   1  -6 2251.21 111.690   8
   1  -1  -6 427.693 21.9118   8
  -1   1   6 439.770 21.9713   8
   1   1  -6 418.737 21.8721   8
  -1   1   6 430.182 21.5170   5
   0  -1   6 514.786 28.8550   5
   0  -1  -6 588.434 29.4088   8
   0  -1  -6 620.028 29.1748   5
   0   1  -6 600.032 28.7172   5
   0   1   6 608.841 29.3253   5
  -1  -1  -6 8.78271 1.76634   8
  -1  -1  -6 8.15301 1.81777   5
  -1  -1  -6 7.53783 1.84071  10
   1  -1   6 7.12367 1.84764   5
   1   1   6 8.71918 2.49307   5
  -1   1  -6 7.00510 1.59750   5
  -2  -1  -6 492.775 24.3192   5
  -2  -1  -6 468.216 24.2493  10
   2  -1   6 436.420 24.4794   5
   2   1   6 493.508 24.7820   5
  -2   1  -6 469.171 24.3032  10
  -2   1  -6 458.895 24.1858   5
  -3  -1  -6 4.92441 1.90232   5
  -3  -1  -6 3.25576 3.17847  10
   3   1   6 6.30156 2.64922   5
  -3   1  -6 5.69744 2.10573   5
  -3   1  -6 3.70130 2.16068  10
  -4  -1  -6 374.095 19.8963  10
  -4  -1  -6 342.936 19.1044   3
  -4   1  -6 354.067 19.6394  10
  -4   1  -6 382.287 19.3362   8
   4   1   6 333.128 20.5714   5
  -5  -1  -6 -1.5103 1.41946   8
  -5  -1  -6 -0.3006 2.56215  10
  -5  -1  -6 0.97587 2.35895   3
  -5   1  -6 0.39083 1.77219   8
   5   1   6 0.01876 2.53641   5
  -5   1  -6 -1.1953 2.46652  10
  -6  -1  -6 25.4676 3.30670   8
  -6  -1  -6 27.4513 4.91216  10
  -6  -1  -6 29.3558 4.75798   3
  -6   1  -6 24.2450 3.59885   8
  -6   1  -6 28.4601 4.87011  10
  -6   1  -6 29.6427 4.89435   3
  -7  -1  -6 25.5774 4.70752   3
  -7  -1  -6 23.7916 5.10707  10
  -7   1  -6 27.7073 4.91415   3
  -7   1  -6 21.2977 4.81781  10
  -8  -1  -6 95.3215 9.04618  10
  -8  -1  -6 90.7933 8.58381   3
  -8   1  -6 93.2580 8.73929   3
  -8   1  -6 86.5032 8.88813  10
  -9  -1  -6 11.7167 4.05770   3
  -9   1  -6 15.6979 4.56862  10
  -9   1  -6 15.9776 4.31610   3
 -10  -1  -6 3.84065 3.40774   3
  10  -1   6 0.41238 3.32102   6
 -10   1  -6 9.45952 4.09871   3
  11  -1   6 2.44510 2.73541   6
 -11   1  -6 0.33566 2.79339   3
  11   1   6 -0.5271 2.54649   6
 -12  -2   6 -0.5285 1.55628   9
  12   2  -6 2.22002 2.89006   4
  11  -2  -6 2.69955 2.33982   6
 -11  -2   6 3.44154 2.16880   9
  11   2  -6 0.53528 3.30602   4
  10  -2  -6 7.23645 2.94830   6
 -10  -2   6 6.86482 2.41209   9
  10  -2  -6 5.44171 3.43132   4
  10   2  -6 7.33218 4.37577   4
  -9  -2   6 112.955 7.41201   9
   9   2  -6 118.119 10.1809   4
   8  -2  -6 57.5798 7.17229   4
   8  -2  -6 73.0315 6.12410   6
  -8   2   6 71.1790 6.97605   3
   7  -2  -6 51.1438 6.20551   7
   7  -2  -6 62.7183 6.70922   4
   7  -2  -6 65.1040 8.58597   6
  -7   2   6 62.8695 5.92737   8
  -7   2   6 66.3245 6.13876   3
   6  -2  -6 386.873 20.5376   6
   6  -2  -6 416.168 21.8543   4
  -6  -2   6 356.236 20.6174   5
   6  -2  -6 385.275 20.8700   7
  -6   2   6 391.587 20.7947   3
   6   2  -6 369.672 20.0968   8
  -6   2   6 405.444 21.1948   8
   5  -2  -6 1140.18 57.1847   6
  -5  -2   6 1149.89 56.3623   9
  -5  -2   6 1135.78 57.0611   5
   5  -2  -6 1171.24 58.2981   4
   5   2  -6 1143.80 56.7228   8
  -5   2   6 1200.48 57.9322   8
  -5   2   6 1152.67 57.2790   3
  -4  -2   6 921.407 44.7294   5
   4  -2  -6 901.992 46.2693   4
  -4  -2   6 879.054 44.4483   9
   4   2  -6 879.717 44.8585   8
  -4   2   6 971.819 45.8568   8
   3  -2  -6 445.183 24.6422   8
  -3  -2   6 479.953 22.5974   5
   3   2  -6 435.689 23.2952   8
  -3   2   6 483.290 24.0695   8
   2  -2  -6 539.400 28.5876   8
  -2   2   6 575.000 28.7656   8
   2   2  -6 542.184 28.3010   8
  -2   2   6 600.427 28.4219   5
   1  -2  -6 302.170 16.7853   8
  -1   2   6 336.003 16.7675   5
  -1   2   6 326.177 16.9292   8
   0  -2  -6 169.677 9.89515   8
   0  -2  -6 189.375 10.0096   5
   0   2   6 179.310 10.1172   5
   0   2  -6 180.068 9.25088   5
   0   2   6 179.199 9.93473   8
  -1  -2  -6 860.104 43.7762   8
  -1  -2  -6 938.682 44.1897   5
   1   2   6 926.271 44.4439   5
  -1   2  -6 828.291 43.7475   5
   2  -2   6 1115.54 55.7329   9
  -2  -2  -6 1117.29 56.7209  10
  -2  -2  -6 1155.92 56.8878   5
  -2  -2  -6 1192.35 56.2949   8
  -2   2  -6 1106.08 56.7936   5
   2   2   6 1197.38 57.3768   5
   3  -2   6 370.793 19.7087   2
  -3  -2  -6 399.078 21.0490  10
  -3  -2  -6 396.892 19.9937   8
  -3   2  -6 364.978 20.9884   5
  -3   2  -6 398.529 20.9703  10
   3   2   6 411.902 21.6545   5
  -4  -2  -6 365.049 19.7594   8
  -4  -2  -6 391.231 21.1688  10
   4  -2   6 363.935 19.5264   2
  -4  -2  -6 393.636 20.4880   3
  -4  -2  -6 385.850 19.6562   8
   4   2   6 368.068 21.7337   5
  -4   2  -6 412.951 20.8821   8
  -4   2  -6 406.308 21.1414  10
  -5  -2  -6 176.395 10.7070   3
  -5  -2  -6 188.799 11.5985  10
  -5  -2  -6 148.751 9.41403   8
  -5  -2  -6 171.761 9.38361   8
  -5   2  -6 178.144 11.2035  10
   5   2   6 154.161 11.6778   5
  -5   2  -6 167.106 10.7010   8
  -6  -2  -6 93.6677 7.48579   3
  -6  -2  -6 105.006 8.80792  10
  -6  -2  -6 86.2344 5.90323   8
  -6   2  -6 95.3998 8.09568   3
  -6   2  -6 98.8900 8.22993  10
   6   2   6 76.4008 8.44821   5
  -6   2  -6 94.2648 7.42575   8
  -7  -2  -6 24.2224 5.10423  10
  -7  -2  -6 25.7128 4.79927   3
  -7   2  -6 30.5630 5.31249   3
  -7   2  -6 24.7207 5.04350  10
  -8  -2  -6 24.7084 5.18345   3
  -8   2  -6 23.4731 5.10386   3
  -8   2  -6 22.2418 4.72806  10
  -9  -2  -6 38.4156 5.29829   3
   9  -2   6 36.0056 5.47639   6
  -9   2  -6 32.9743 5.22735  10
  -9   2  -6 27.7531 5.14729   3
 -10  -2  -6 26.3707 4.25812   3
  10  -2   6 27.6521 5.00692   6
 -10   2  -6 30.0966 5.17124   3
  11  -2   6 4.16595 2.58622   6
 -11  -2  -6 5.42067 2.08671   9
 -11   2  -6 12.5132 3.06081   3
 -12  -3   6 0.71202 1.77461   9
  12   3  -6 5.60800 3.80225   4
 -11  -3   6 0.65257 2.21174   9
  11  -3  -6 -5.4453 2.07215   6
  11   3  -6 -2.2483 3.19176   4
 -10  -3   6 4.95977 2.35646   9
  10  -3  -6 -1.3734 2.55363   6
  10   3  -6 -1.7830 3.58943   4
   9  -3  -6 42.9249 5.53176   4
  -9  -3   6 36.3863 3.93505   9
   9  -3  -6 29.1101 4.56629   6
   8  -3  -6 123.695 9.24922   6
   8  -3  -6 122.003 9.77352   4
  -8  -3   6 138.455 8.23524   9
  -8   3   6 138.860 9.47178   3
   7  -3  -6 15.3053 4.09210   4
  -7  -3   6 14.1883 2.72244   9
   7  -3  -6 18.0886 3.53964   6
  -7   3   6 19.1222 3.55320   3
  -6  -3   6 211.865 10.2285   9
  -6  -3   6 154.748 10.4365   5
   6  -3  -6 184.995 12.0599   4
   6  -3  -6 198.095 11.3767   6
   6   3  -6 162.563 9.67806   8
  -6   3   6 190.641 11.6456   8
  -6   3   6 180.069 10.9476   3
   5  -3  -6 801.448 40.9223   4
  -5  -3   6 768.970 39.1102   5
   5  -3  -6 812.650 40.0580   6
  -5  -3   6 801.198 38.9413   9
   5   3  -6 753.855 38.7910   8
  -5   3   6 772.174 39.6042   3
  -5   3   6 824.292 40.5145   8
   4  -3  -6 3.45015 2.12813   6
  -4  -3   6 6.30685 1.49990   9
   4  -3  -6 7.64652 2.94646   4
  -4  -3   6 7.67683 1.21141   5
   4   3  -6 5.15288 1.34969   8
  -4   3   6 6.22400 2.48089   8
   3  -3  -6 0.74440 1.54113   6
   3  -3  -6 2.08090 1.50771   8
   3  -3  -6 6.17715 2.74354   4
  -3  -3   6 4.64486 1.34177   9
   3   3  -6 2.94022 1.26011   8
  -3   3   6 3.80875 2.04072   8
  -2  -3   6 4.62148 1.24349   9
   2  -3  -6 5.14500 1.70480   8
  -2   3   6 2.54004 1.71122   5
  -2   3   6 3.56837 1.97198   8
   2   3  -6 5.77333 1.52790   8
   1  -3  -6 947.403 50.5575   8
  -1   3   6 1041.51 50.7356   8
  -1   3   6 1086.10 50.8459   5
   0  -3  -6 328.487 17.5923   8
   0  -3   6 324.040 17.3539   2
   0   3   6 375.443 18.2489   5
   0   3   6 356.812 17.6959   8
   0   3  -6 318.139 17.1358   5
  -1  -3  -6 439.263 22.9400   8
  -1  -3  -6 493.704 23.7145   5
   1  -3   6 451.455 22.5323   9
   1  -3   6 442.346 22.9159   2
  -1  -3  -6 441.924 23.4708   6
  -1   3  -6 429.210 23.2009   5
   1   3   6 484.145 23.9876   5
   2  -3   6 207.788 11.1229   9
   2  -3   6 203.498 12.4271   2
  -2  -3  -6 209.466 11.9795  10
  -2  -3  -6 221.785 11.3983   8
  -2  -3  -6 224.701 12.1740   6
   2  -3   6 217.261 12.1635   6
  -2   3  -6 205.315 12.2457   5
   2   3   6 223.069 12.8905   5
   3  -3   6 155.898 9.76465   6
  -3  -3  -6 148.309 8.95960   8
   3  -3   6 156.516 8.92535   2
  -3  -3  -6 169.548 9.96158  10
  -3   3  -6 187.178 13.2590   8
   3   3   6 161.616 12.0214   5
  -3   3  -6 140.360 11.9292   5
  -3   3  -6 157.779 9.89666  10
  -4  -3  -6 0.66160 2.39882  10
  -4  -3  -6 -0.6381 0.72136   8
  -4  -3  -6 -0.6932 1.96374   3
  -4  -3  -6 0.22720 0.93512   8
  -4   3  -6 2.69523 2.20936  10
   4   3   6 0.60274 2.47589   5
  -4   3  -6 3.46343 2.23370   8
   5  -3   6 2.28045 2.80965   6
  -5  -3  -6 3.33731 3.01801  10
  -5  -3  -6 3.56759 2.48056   3
   5  -3   6 2.15622 1.53555   2
   5   3   6 0.35966 2.55015   5
  -5   3  -6 1.05287 2.28298   8
  -5   3  -6 3.62482 2.78765  10
   6  -3   6 193.427 11.8882   2
   6  -3   6 220.286 13.9772   6
  -6  -3  -6 228.150 14.2065  10
  -6  -3  -6 217.742 13.1036   3
  -6   3  -6 218.781 13.7059   3
  -6   3  -6 214.600 13.7087  10
   7  -3   6 82.0309 8.18810   6
  -7  -3  -6 85.9909 7.27478   3
  -7   3  -6 84.0217 8.28885   3
  -7   3  -6 67.7939 7.49558  10
  -8  -3  -6 18.6411 4.34156   3
   8  -3   6 24.6236 4.84987   6
  -8   3  -6 30.0073 5.34348   3
  -8   3  -6 25.1860 6.97795  10
   9  -3   6 29.6373 5.21041   6
  -9   3  -6 38.1855 5.93857   3
  -9   3  -6 33.0078 4.97459  10
 -10  -3  -6 -1.1705 1.85338   9
  10  -3   6 -0.7400 2.94748   6
 -10   3  -6 -1.3686 2.80841   3
 -11  -3  -6 0.77037 1.38669   9
  11  -3   6 -3.8683 1.92261   6
 -11   3  -6 3.61815 2.97608   3
 -12  -4   6 13.0797 1.92640   9
  12   4  -6 5.66852 2.49443   4
 -11  -4   6 8.52592 2.43929   9
  11  -4  -6 6.84135 2.38177   6
  11   4  -6 7.90468 3.49708   4
  10  -4  -6 1.00847 2.86017   6
 -10  -4   6 1.17192 2.30601   9
  10   4  -6 -2.5518 3.29164   4
  -9  -4   6 26.5716 3.44755   9
   9  -4  -6 25.0130 4.23622   6
   8  -4  -6 56.3058 9.61251   6
  -8  -4   6 52.8611 4.95755   9
  -7  -4   6 117.310 7.02762   9
   7  -4  -6 107.249 8.25443   6
  -7   4   6 97.4259 7.57629   3
  -6  -4   6 205.350 11.0585   9
   6  -4  -6 202.558 12.3430   6
  -6   4   6 192.630 11.5305   3
  -6   4   6 192.618 12.5268   8
  -5  -4   6 162.320 8.84387   9
  -5  -4   6 139.207 8.44057   5
   5  -4  -6 161.153 10.1296   6
  -5   4   6 163.717 10.3592   8
  -5   4   6 155.944 9.22815   3
   4  -4  -6 102.904 7.26503   6
  -4  -4   6 98.6833 5.97354   9
  -4  -4   6 91.9193 5.82732   2
   4   4  -6 93.3071 5.46013   8
  -4   4   6 99.4290 7.34155   8
   3  -4  -6 91.9272 6.51155   6
  -3  -4   6 93.7483 5.37791   9
   3   4  -6 80.2247 4.89977   5
  -3   4   6 88.7836 6.57304   8
   3   4  -6 85.5895 5.27751   8
   2  -4  -6 334.150 18.9721   6
  -2  -4   6 346.545 18.2199   2
   2  -4  -6 316.833 18.6652   8
  -2  -4   6 365.003 17.9129   9
   2   4  -6 351.567 18.3390   8
  -2   4   6 377.870 19.0902   8
  -2   4   6 392.834 19.1905   5
   2   4  -6 347.423 17.4657   5
  -1  -4   6 1218.73 62.4135   2
   1  -4  -6 1195.61 62.7118   8
   1  -4  -6 1204.00 63.0833   6
  -1  -4   6 1249.32 62.0040   9
   1   4  -6 1347.36 61.8221   5
  -1   4   6 1329.01 62.9514   8
  -1   4   6 1381.00 63.3051   5
   0  -4   6 253.817 13.3028   9
   0  -4  -6 256.798 13.7844   8
   0  -4   6 255.548 13.8033   2
   0  -4  -6 255.941 14.4667   6
   0   4   6 270.185 14.6696   5
   0   4  -6 278.024 13.2673   5
   0   4  -6 232.924 13.6263   5
   0   4   6 268.808 13.8894   8
   1  -4   6 68.6835 4.71954   2
  -1  -4  -6 69.6177 5.29218   6
   1  -4   6 62.0339 4.11113   9
  -1  -4  -6 68.6086 4.32248   8
   1  -4   6 59.5887 4.95869   6
   1   4   6 66.6677 5.71928   5
  -1   4  -6 60.4045 4.85339   5
  -2  -4  -6 209.443 11.9338   6
  -2  -4  -6 198.771 11.2741  10
  -2  -4  -6 197.615 10.4503   8
   2  -4   6 204.278 11.8283   6
  -2  -4  -6 198.148 10.6504   9
   2  -4   6 212.484 10.7539   9
   2  -4   6 207.797 11.2715   2
  -2   4  -6 186.590 11.9162   5
   2   4   6 207.377 12.5567   5
  -3  -4  -6 74.2017 4.65551   9
   3  -4   6 80.9673 5.51797   2
  -3  -4  -6 73.2588 5.74373  10
   3  -4   6 78.0547 6.27674   6
   3   4   6 70.8672 6.82055   5
  -3   4  -6 78.0851 6.13474  10
  -3   4  -6 84.5611 6.50816   8
   4  -4   6 167.869 9.55899   2
  -4  -4  -6 146.393 10.2991   3
  -4  -4  -6 161.027 8.91192   9
   4  -4   6 187.221 11.2170   6
  -4  -4  -6 169.033 10.6095  10
  -4   4  -6 162.768 10.7175   8
  -4   4  -6 156.256 10.3434  10
   4   4   6 158.854 11.3748   5
  -5  -4  -6 33.0982 4.19799   3
   5  -4   6 32.5339 5.01165   6
   5  -4   6 30.5498 3.52985   2
  -5   4  -6 29.9801 7.18441  10
  -5   4  -6 27.4748 5.95680   8
   6  -4   6 174.082 10.6501   2
  -6  -4  -6 190.016 11.5633   3
   6  -4   6 199.155 13.1760   6
  -6   4  -6 196.357 12.7559   3
  -6   4  -6 196.818 12.4159  10
  -7  -4  -6 23.6716 3.24093   9
   7  -4   6 24.8103 5.17711   6
  -7   4  -6 25.3479 4.39165  10
  -7   4  -6 33.3451 5.24116   3
  -8  -4  -6 7.82947 2.51680   9
   8  -4   6 15.0354 4.40620   6
  -8   4  -6 10.0646 4.36463   3
  -8   4  -6 12.8606 3.47988  10
   9  -4   6 2.68128 3.97356   6
  -9  -4  -6 3.60385 2.09946   9
  -9   4  -6 3.30283 3.46255   3
 -10  -4  -6 4.55122 1.83843   9
  10  -4   6 3.66448 2.91143   6
 -10   4  -6 5.33312 2.92374   3
  11  -5  -6 1.64888 2.25291   6
 -11  -5   6 3.23488 1.81202   9
  11   5  -6 -1.4430 2.76216   4
 -10  -5   6 18.4093 2.90553   9
  10  -5  -6 20.5948 3.70456   6
  -9  -5   6 3.24320 2.40094   9
   9  -5  -6 0.66303 2.84792   6
  -8  -5   6 6.14330 2.62674   9
   8  -5  -6 9.60691 3.59173   6
   7  -5  -6 0.33005 3.00992   6
  -7  -5   6 2.84312 2.57756   9
   6  -5  -6 0.60317 2.74174   6
  -6  -5   6 -0.6804 1.97477   9
   5  -5  -6 31.4448 4.60869   6
  -5  -5   6 29.3384 3.35530   9
  -5  -5   6 27.4105 3.01979   2
  -5   5   6 24.3063 4.11267   8
  -4  -5   6 176.453 9.52712   9
   4  -5  -6 178.840 11.1666   6
  -4  -5   6 161.788 9.44243   2
  -4   5   6 171.322 10.8549   5
  -4   5   6 156.729 10.8309   8
  -3  -5   6 371.538 19.0814   2
   3  -5  -6 395.446 20.4456   6
  -3  -5   6 351.076 18.9736   6
   3   5  -6 340.831 18.5266   5
   3   5  -6 370.920 18.4757   8
   3   5  -6 340.659 18.4601   8
  -3   5   6 386.186 20.2333   8
  -3   5   6 396.868 20.2933   5
  -2  -5   6 79.2400 5.90304   6
  -2  -5   6 92.2343 5.63230   9
  -2  -5   6 94.9430 6.09335   2
   2  -5  -6 98.5239 7.11270   6
   2   5  -6 93.2719 5.33718   5
   2   5  -6 86.4445 5.58153   8
   2   5  -6 88.9324 5.79434   8
  -2   5   6 99.1003 7.00648   5
  -2   5   6 88.7476 6.60901   8
  -1  -5   6 20.5214 2.42182   9
  -1  -5   6 23.9801 2.99242   6
   1  -5  -6 25.3487 3.69377   6
  -1  -5   6 21.1910 2.91411   2
   1  -5  -6 24.6391 2.79981   8
  -1   5   6 25.0988 3.17137   8
   1   5  -6 24.3193 2.30516   5
  -1   5   6 24.2823 3.77051   5
   1   5  -6 25.9295 2.83310   8
   0  -5   6 72.8926 4.85594   9
   0  -5   6 74.5355 5.50213   6
   0  -5  -6 79.6044 6.25990   6
   0  -5   6 77.3910 5.51189   2
   0  -5  -6 70.3683 4.90801   8
   0   5   6 74.5509 6.16384   5
   0   5  -6 75.0764 4.72232   5
   0   5  -6 76.9039 5.49340   8
   0   5   6 74.2680 5.12099   8
  -1  -5  -6 24.0717 2.31610   9
   1  -5   6 28.0015 2.87324   9
   1  -5   6 30.9127 3.90690   6
  -1  -5  -6 27.5218 3.95652   6
  -1  -5  -6 27.7841 2.41530   8
   1  -5   6 30.8295 3.52905   2
  -1   5  -6 22.0580 3.18589   5
   1   5   6 28.9630 4.39105   5
  -1   5  -6 28.5584 3.59140   8
  -1   5  -6 27.0658 2.73342   5
   2  -5   6 15.7365 2.32142   9
   2  -5   6 15.7767 3.22052   2
  -2  -5  -6 13.0817 3.19928   6
  -2  -5  -6 15.7405 1.78456   9
   2  -5   6 17.8941 3.16548   6
  -2   5  -6 22.1701 3.41179   8
   2   5   6 17.0699 3.67370   5
  -3  -5  -6 33.3852 2.97102   9
   3  -5   6 36.8482 4.12357   2
   3  -5   6 35.5631 4.85221   6
   3  -5   6 34.3780 3.35796   9
  -3  -5  -6 42.8248 4.84387   6
  -3   5  -6 34.6989 4.64446   8
  -3   5  -6 35.2792 4.37821  10
   3   5   6 36.2788 5.12722   5
   4  -5   6 7.15973 2.48472   2
  -4  -5  -6 6.81482 1.65881   9
   4  -5   6 6.58458 3.24708   6
  -4   5  -6 3.53434 2.66433   8
  -4   5  -6 7.57677 2.53912  10
   4   5   6 7.79347 3.27657   5
   5  -5   6 73.9104 5.78207   2
  -5  -5  -6 66.1770 4.95193   9
   5  -5   6 77.1978 7.67187   6
  -5   5  -6 69.9211 6.25989  10
   6  -5   6 38.6686 4.05439   2
   6  -5   6 49.8399 6.29781   6
  -6  -5  -6 43.6245 5.81836   9
  -6   5  -6 29.3657 4.94624   3
  -6   5  -6 34.9575 4.89632  10
   7  -5   6 5.71779 4.02521   6
  -7  -5  -6 9.54817 2.35294   9
  -7   5  -6 8.71529 3.93514   3
  -8  -5  -6 4.30802 2.06528   9
   8  -5   6 5.39869 3.84300   6
  -8   5  -6 11.3652 2.73741  10
  -8   5  -6 3.96658 3.31294   3
  -9  -5  -6 -1.3267 1.60880   9
   9  -5   6 0.21449 3.07267   6
  -9   5  -6 -1.3523 2.54187   3
  10  -5   6 0.56972 2.52380   6
 -10  -5  -6 -0.1471 1.33361   9
 -10   5  -6 -0.7728 2.41147   3
  11  -6  -6 10.3473 2.28108   6
 -11  -6   6 15.0270 2.19131   9
  11   6  -6 7.25263 2.62634   4
 -10  -6   6 1.83545 1.96852   9
  10  -6  -6 3.73189 2.53714   6
   9  -6  -6 0.38603 3.17207   6
  -9  -6   6 0.90853 3.21132   9
   8  -6  -6 23.7540 4.62144   6
  -8  -6   6 24.0176 3.42126   9
  -7  -6   6 148.902 9.31298   9
   7  -6  -6 154.641 11.1117   6
  -6  -6   6 17.7614 2.93328   9
  -5  -6   6 14.2186 2.32295   2
  -5  -6   6 16.0783 2.71601   9
   5  -6  -6 20.5630 4.43210   6
  -4  -6   6 9.90699 2.24348   2
   4  -6  -6 8.08348 3.25111   6
  -4  -6   6 9.46136 2.31558   9
  -4   6   6 7.08358 2.82219   8
  -3  -6   6 73.1819 5.54856   6
  -3  -6   6 91.1670 5.65798   9
   3  -6  -6 82.3903 7.24862   6
  -3  -6   6 83.8670 5.90702   2
  -3   6   6 83.7570 6.91842   5
  -3   6   6 82.1896 6.59962   8
   2  -6  -6 10.3685 2.02310   9
  -2  -6   6 10.4058 2.24150   6
  -2  -6   6 1.94493 2.11997   2
  -2  -6   6 7.06600 2.06832   9
   2  -6  -6 4.24024 2.84856   6
   2   6  -6 6.68797 1.63735   5
   2   6  -6 5.78989 1.51290   8
  -2   6   6 6.19214 1.94507   8
  -2   6   6 6.98625 2.62018   5
  -1  -6   6 58.2397 5.24145   2
  -1  -6   6 58.7736 5.02786   6
   1  -6  -6 76.1795 6.42975   6
  -1  -6   6 65.0594 4.54674   9
   1   6  -6 61.6744 4.77395   8
  -1   6   6 60.5467 5.10011   8
   1   6  -6 62.2609 4.31795   5
  -1   6   6 64.4327 5.97098   5
   0  -6  -6 696.926 34.8247   9
   0  -6   6 761.888 35.4041   9
   0  -6   6 725.193 36.0616   2
   0  -6   6 694.749 36.2870   6
   0  -6  -6 746.516 37.0738   6
   0   6  -6 690.613 36.0932   8
   0   6   6 681.819 35.5633   8
   0   6   6 688.504 36.9824   5
   0   6  -6 722.988 35.5133   5
  -1  -6  -6 349.472 19.0536   6
   1  -6   6 351.639 18.2108   2
   1  -6   6 356.134 17.4580   9
   1  -6   6 300.181 20.3145   6
  -1  -6  -6 330.824 16.9134   9
   1   6   6 326.664 19.2196   5
  -1   6  -6 323.363 18.4203   8
  -1   6  -6 345.865 17.7334   5
   2  -6   6 53.3332 4.34724   9
  -2  -6  -6 56.7455 3.69919   9
   2  -6   6 56.7356 5.25844   2
  -2  -6  -6 57.2089 5.87234   6
   2  -6   6 65.5714 5.95273   6
  -2   6  -6 51.7311 5.24755   8
   2   6   6 53.3104 5.95231   5
  -2   6  -6 54.6183 4.43140   5
   3  -6   6 106.873 7.23807   2
  -3  -6  -6 91.5767 5.68007   9
   3  -6   6 94.4576 7.90645   6
   3  -6   6 86.5630 6.06198   9
  -3  -6  -6 98.3842 7.75851   6
  -3   6  -6 92.2249 6.92051  10
   4  -6   6 116.565 8.00884   2
  -4  -6  -6 109.514 6.68638   9
   4  -6   6 121.528 9.46691   6
  -4   6  -6 108.665 7.80363  10
   5  -6   6 196.120 13.0071   6
  -5  -6  -6 186.735 10.4251   9
  -5   6  -6 178.750 11.3900  10
   6  -6   6 136.187 8.43759   2
  -6  -6  -6 131.317 7.99321   9
   6  -6   6 128.683 10.5227   6
  -6   6  -6 138.823 9.81603   3
  -6   6  -6 132.966 9.09259  10
   7  -6   6 144.431 10.4845   6
   7  -6   6 116.813 8.28605   2
  -7  -6  -6 133.059 7.95573   9
  -7   6  -6 144.259 10.0099   3
   8  -6   6 53.9214 6.69917   6
  -8  -6  -6 54.5212 4.41762   9
  -8   6  -6 66.2960 6.32097   3
  -9  -6  -6 20.1903 2.82989   9
   9  -6   6 15.2514 3.47409   6
  -9   6  -6 16.6144 3.31838   3
  10  -7  -6 4.89825 2.01968   6
 -10  -7   6 3.11147 1.88925   9
  10   7  -6 1.52697 2.57344   4
  -9  -7   6 4.00409 2.27813   9
   9  -7  -6 1.37989 2.71013   6
  -8  -7   6 1.35023 2.29287   9
   8  -7  -6 4.95700 4.62552   6
   7  -7  -6 -0.5691 3.18675   6
  -7  -7   6 -0.0262 2.06014   9
  -6  -7   6 23.2862 3.36510   9
   6  -7  -6 19.9617 4.84812   6
  -5  -7   6 2.44664 1.84214   2
  -5  -7   6 5.91561 2.41842   9
   5  -7  -6 7.11382 3.84203   6
   4  -7  -6 48.7314 6.38831   6
  -4  -7   6 42.4259 4.29799   2
  -4  -7   6 44.0407 4.69180   9
  -3  -7   6 24.7837 3.18010   6
   3  -7  -6 27.1521 4.80977   6
  -3  -7   6 27.5423 3.32031   9
  -3  -7   6 34.6401 4.05516   2
  -2  -7   6 117.986 7.97638   2
  -2  -7   6 111.471 7.64376   6
   2  -7  -6 130.072 9.40576   6
  -2  -7   6 118.356 7.22985   9
  -2   7   6 105.704 7.98454   8
   1  -7  -6 46.8278 3.48213   9
  -1  -7   6 47.8069 4.88564   6
  -1  -7   6 51.8823 5.33029   2
   1  -7  -6 50.3975 6.14629   6
  -1  -7   6 49.4131 4.36392   9
  -1   7   6 50.4043 4.58596   8
   0  -7   6 24.2088 2.93418   9
   0  -7  -6 19.8408 2.31235   9
   0  -7   6 21.7820 3.73007   6
   0  -7   6 22.0257 3.75125   2
   0  -7  -6 23.8982 4.45370   6
   0   7  -6 32.2712 3.76656   8
   1  -7   6 0.73814 2.39799   6
  -1  -7  -6 -0.4569 1.17899   9
   1  -7   6 -3.1419 1.71610   9
  -1  -7  -6 4.15238 3.22718   6
   1  -7   6 5.41529 2.82013   2
  -1   7  -6 0.68849 1.88988   8
   2  -7   6 17.8719 3.50600   2
  -2  -7  -6 19.2663 2.13824   9
  -2  -7  -6 17.3883 4.02504   6
   2  -7   6 19.3317 4.23186   6
   2  -7   6 19.6392 2.77717   9
  -2   7  -6 16.8338 2.87707  10
   3  -7   6 9.05456 3.58534   6
  -3  -7  -6 6.17042 3.56042   6
  -3  -7  -6 6.27103 1.60357   9
  -3   7  -6 1.22198 2.01294  10
   4  -7   6 3.81026 3.65312   6
   4  -7   6 5.10234 2.79811   2
  -4  -7  -6 2.73544 2.87190   9
   5  -7   6 13.1449 4.38234   6
   5  -7   6 9.43782 2.74987   2
  -5  -7  -6 13.5006 2.20067   9
  -5   7  -6 16.8334 3.66955   3
   6  -7   6 3.71637 3.57097   6
  -6  -7  -6 -1.4208 1.51753   9
   6  -7   6 -1.2449 2.03046   2
  -6   7  -6 6.02783 2.77060   3
   7  -7   6 0.36186 1.82753   2
  -7  -7  -6 -1.2160 1.42141   9
   7  -7   6 2.86259 3.57209   6
  -7   7  -6 -0.8374 2.34350   3
  -8  -7  -6 0.13099 1.41866   9
   8  -7   6 7.28255 3.41864   6
  -8   7  -6 -2.2360 2.01747   3
   9  -7   6 1.52748 2.37285   6
  -9  -7  -6 2.66727 1.53826   9
  -9   7  -6 2.40379 2.12502   3
   9  -8  -6 11.1943 3.11339   6
  -9  -8   6 17.6456 2.46036   9
  -8  -8   6 7.51304 2.53718   9
   8  -8  -6 6.09680 2.83900   6
   7  -8  -6 67.8203 7.10619   6
  -7  -8   6 56.6546 6.50886   9
   6  -8  -6 29.3868 5.14293   6
  -6  -8   6 41.0980 4.34189   9
   5  -8  -6 42.3054 5.67984   6
  -5  -8   6 28.2679 3.57340   2
  -4  -8   6 122.966 7.50125   9
   4  -8  -6 115.931 9.57563   6
  -4  -8   6 94.5850 7.24259   2
  -3  -8   6 242.625 14.8878   6
  -3  -8   6 272.465 15.3306   2
   3  -8  -6 300.609 17.2981   6
  -3  -8   6 289.378 14.8923   9
  -2  -8   6 30.1507 3.48633   9
  -2  -8   6 37.2455 4.19356   6
  -2  -8   6 31.7904 4.47538   2
   2  -8  -6 26.2876 5.06365   6
  -1  -8   6 9.95948 3.11173   2
  -1  -8   6 13.9180 3.00792   6
   1  -8  -6 20.9436 4.68561   6
  -1  -8   6 13.4465 2.75285   9
   0  -8   6 811.025 40.1918   2
   0  -8   6 750.206 40.2646   6
   0  -8   6 786.841 39.1690   9
   0  -8  -6 798.350 41.1908   6
   1  -8   6 516.285 26.4284   2
   1  -8   6 515.867 25.3830   9
   1  -8   6 474.320 27.2674   6
  -1  -8  -6 464.976 24.6035   9
  -1  -8  -6 515.026 27.2698   6
   2  -8   6 75.6651 5.55456   9
  -2  -8  -6 78.8856 7.47011   6
   2  -8   6 78.6877 7.43703   6
   2  -8   6 72.5247 6.61781   2
   3  -8   6 40.1248 5.65482   6
   3  -8   6 45.5336 5.29190   2
  -3  -8  -6 36.6882 3.23180   9
  -4  -8  -6 0.65279 1.37756   9
   4  -8   6 2.53785 3.45530   6
   4  -8   6 6.49089 2.81134   2
  -4   8  -6 2.03087 2.30276   3
   5  -8   6 2.98961 3.43928   6
  -5  -8  -6 2.46059 1.76172   9
   5  -8   6 0.56594 2.35126   2
  -5   8  -6 2.45914 3.13459   3
   6  -8   6 0.76419 2.89272   6
   6  -8   6 0.29992 1.96742   2
  -6  -8  -6 1.79214 1.36185   9
  -6   8  -6 0.78443 2.12300   3
   7  -8   6 16.5620 3.96170   6
  -7  -8  -6 11.4884 1.89633   9
  -7   8  -6 18.6502 2.68424   3
   8  -8   6 2.37837 2.56891   6
  -8  -9   6 2.22202 1.91813   9
   8  -9  -6 -2.0217 1.88932   6
   7  -9  -6 0.49113 2.47574   6
  -7  -9   6 0.20470 1.85935   9
   6  -9  -6 -2.0854 2.58365   6
  -6  -9   6 -1.2918 2.05579   9
   5  -9  -6 2.25210 3.67431   6
  -5  -9   6 0.95972 2.56365   9
   4  -9  -6 -1.1306 2.86174   6
  -4  -9   6 0.18979 1.84865   2
  -4  -9   6 -0.8730 2.16121   9
  -3  -9   6 7.68190 2.56587   2
   3  -9  -6 12.2301 4.19225   6
  -3  -9   6 11.8198 2.80497   9
  -2  -9   6 20.9907 3.50554   2
  -2  -9   6 22.9794 3.03637   9
   2  -9  -6 27.5453 5.23984   6
  -2  -9   6 18.2339 3.02878   6
  -1  -9   6 184.440 10.4394   9
  -1  -9   6 168.158 10.9305   6
  -1  -9   6 184.102 11.3993   2
   1  -9  -6 188.608 12.7289   6
   0  -9   6 42.2183 5.17429   2
   0  -9   6 43.6379 5.27076   6
   0  -9  -6 50.5129 6.27296   6
   0  -9   6 49.5225 4.70886   9
   1  -9   6 6.99931 3.11399   6
   1  -9   6 6.38825 3.07702   2
   1  -9   6 10.3364 2.39424   9
  -1  -9  -6 5.86079 3.43431   6
   2  -9   6 21.9122 2.85541   9
   2  -9   6 15.9006 3.43455   2
  -2  -9  -6 24.9569 4.22750   6
   2  -9   6 13.0916 3.52487   6
   3  -9   6 7.44997 3.28470   6
   3  -9   6 18.4420 3.71786   2
   4  -9   6 47.4188 5.29668   2
   4  -9   6 49.0155 5.91022   6
   5  -9   6 12.2290 3.47013   6
   5  -9   6 13.3448 2.66397   2
   6  -9   6 17.7366 3.48424   6
   6 -10  -6 38.5633 4.63342   6
  -6 -10   6 38.4581 3.55928   9
   5 -10  -6 1.34619 2.51346   6
  -5 -10   6 6.08317 1.91798   9
  -4 -10   6 19.4826 2.70692   9
   4 -10  -6 15.7367 3.82697   6
  -3 -10   6 13.0739 2.67323   2
   3 -10  -6 11.4033 3.75789   6
  -3 -10   6 7.64109 2.18748   9
  -2 -10   6 16.2246 3.12237   2
   2 -10  -6 25.3389 4.72271   6
  -2 -10   6 16.7989 2.51792   9
  -1 -10   6 11.0879 3.37245   2
  -1 -10   6 6.83643 2.40473   9
  -1 -10   6 10.0563 2.60032   6
   1 -10  -6 15.3672 6.62500   6
   0 -10   6 3.13294 2.90989   2
   0 -10  -6 3.40324 3.40378   6
   0 -10   6 1.32040 2.14735   9
   0 -10   6 0.74198 2.05317   6
   1 -10   6 36.0778 4.44713   6
   1 -10   6 35.0273 3.72990   9
   1 -10   6 37.4231 4.64709   2
  -1 -10  -6 30.7550 4.46343   6
   2 -10   6 71.5189 6.17376   2
   2 -10   6 61.9022 5.86277   6
   3 -10   6 20.0785 3.78774   6
   3 -10   6 21.7830 3.50177   2
   4 -10   6 13.2185 2.94307   6
   4 -10   6 14.7018 2.74035   2
   5 -10   6 13.6748 2.79661   6
   4 -11  -6 2.93636 3.99641   6
  -4 -11   6 1.06337 1.24888   9
   3 -11  -6 -1.7585 1.82770   6
  -3 -11   6 0.83103 1.33419   9
  -2 -11   6 9.49006 1.78961   9
   2 -11  -6 7.03387 2.72173   6
  -1 -11   6 12.0498 1.96056   9
  -1 -11   6 10.2097 2.40414   2
   1 -11  -6 21.4331 3.60852   6
   0 -11   6 -0.1228 1.40773   9
   0 -11  -6 2.84325 2.20290   6
   0 -11   6 -2.2740 1.63801   2
   1 -11   6 9.14936 2.44400   2
   1 -11   6 9.03547 2.15382   6
   2 -11   6 4.84225 2.14008   2
   2 -11   6 3.61176 1.79512   6
   3 -11   6 3.53498 2.00451   6
 -12   0   7 0.65151 1.42688   9
  12   0  -7 4.03984 3.25437   4
  11   0  -7 -6.0088 4.03735   4
  10   0  -7 -1.6881 3.40810   4
   9   0  -7 -1.5039 2.34399   6
   9   0  -7 2.39159 4.96884   4
  -8   0   7 0.40411 4.20186   8
   8   0  -7 3.02641 3.56174   4
   7   0  -7 4.15652 1.87101   6
  -7   0   7 0.50705 1.86918   8
   7   0  -7 -0.5640 2.77886   4
   6   0  -7 3.65589 3.04663   4
  -6   0   7 -1.1251 1.73708   8
  -5   0   7 0.23243 1.74174   8
  -5   0   7 -2.6162 1.53580   5
   5   0  -7 0.19985 2.41686   4
  -4   0   7 1.10663 1.78146   8
  -4   0   7 0.64892 1.42561   5
   4   0  -7 -0.3235 2.11389   4
  -3   0   7 -0.1904 1.77785   8
   3   0  -7 3.57006 1.78179   8
  -2   0   7 -2.0457 1.67306   8
   2   0  -7 0.52384 1.52400   8
  -2   0   7 1.78121 0.90852   5
   1   0  -7 -0.7351 1.40042   8
  -1   0   7 0.43981 0.97678   5
   0   0   7 -0.5824 1.18497   5
   0   0  -7 0.74196 1.45811   8
   0   0  -7 0.27460 0.87761   5
  -1   0  -7 0.11989 1.13182   5
   1   0   7 1.27704 1.63098   5
  -2   0  -7 0.26836 1.41800   5
  -2   0  -7 -0.8786 1.72805  10
   2   0   7 0.18444 1.90428   5
  -3   0  -7 -0.4593 1.48260   5
   3   0   7 0.84746 2.00559   5
  -3   0  -7 -2.5628 1.80384  10
   4   0   7 2.87390 2.66910   5
  -4   0  -7 1.24869 2.34769  10
  -5   0  -7 0.13483 1.77896   8
  -5   0  -7 -1.4089 2.29631   3
  -5   0  -7 0.47247 2.68218  10
  -6   0  -7 0.81445 3.05105   3
  -6   0  -7 1.28768 3.02086  10
  -6   0  -7 -2.0338 1.83380   8
  -7   0  -7 -1.8216 3.34736  10
  -7   0  -7 2.42448 3.39190   3
  -8   0  -7 -1.2095 3.38743   3
  -8   0  -7 -0.8948 3.59137  10
  -9   0  -7 0.42906 3.31492   3
  -9   0  -7 0.53672 3.23801  10
 -10   0  -7 -3.0181 2.96946   3
 -11   0  -7 -0.5886 3.87458   3
  11   0   7 -2.2272 2.44673   6
 -12  -1   7 12.3056 2.10864   9
 -12   1   7 10.5784 1.87035   9
  12   1  -7 7.45730 2.97857   4
 -11  -1   7 2.48303 3.07317   9
  11  -1  -7 6.03389 3.23966   4
  11   1  -7 7.12693 4.09959   4
  10  -1  -7 62.8356 7.19231   4
  10  -1  -7 64.5373 5.74329   6
 -10  -1   7 61.4241 5.08033   9
  10   1  -7 60.1080 7.59238   4
   9  -1  -7 0.50141 2.28357   6
   9  -1  -7 -1.9896 4.60790   7
   9   1  -7 1.81044 3.64763   4
  -8  -1   7 8.00350 2.78447   8
   8  -1  -7 17.9363 4.54913   4
   8  -1  -7 16.8432 2.94744   6
  -8   1   7 11.1494 3.52464   8
   8   1  -7 14.0023 4.66814   4
   7  -1  -7 145.851 10.4880   4
  -7  -1   7 144.532 9.14671   8
   7  -1  -7 134.925 8.83586   6
  -7   1   7 138.058 9.46748   8
   7   1  -7 145.475 10.6939   4
   6  -1  -7 338.316 19.7997   4
  -6  -1   7 357.602 18.7881   8
  -6  -1   7 325.288 19.0342   5
   6  -1  -7 351.432 18.4204   6
  -6   1   7 362.838 19.2098   8
   5  -1  -7 763.274 39.5604   4
  -5  -1   7 810.868 38.7169   8
  -5  -1   7 775.125 38.7376   5
   5   1  -7 760.322 38.4307   8
  -5   1   7 678.171 39.2834   5
  -5   1   7 810.058 39.0664   8
   4  -1  -7 182.136 11.0591   8
  -4  -1   7 203.085 11.0446   8
   4  -1  -7 177.206 12.1678   4
  -4   1   7 204.772 11.4021   8
   4   1  -7 184.660 10.7140   8
  -3  -1   7 435.491 22.0597   5
   3  -1  -7 434.713 22.9610   8
  -3   1   7 469.318 23.1712   8
   3   1  -7 432.779 22.7079   8
   2  -1  -7 14.2654 2.46347   8
  -2  -1   7 16.7644 1.09477   5
  -2   1   7 18.2863 2.97296   8
  -2   1   7 17.5109 2.26868   5
   2   1  -7 15.7039 2.42738   8
   1  -1  -7 190.140 10.4821   8
  -1  -1   7 168.726 9.24642   5
  -1   1   7 191.167 10.0424   5
   1   1  -7 188.443 10.5194   8
  -1   1   7 193.349 10.5689   8
   0  -1  -7 1502.99 73.0258   5
   0  -1  -7 1507.63 73.4088   8
   0  -1   7 1344.03 72.7920   5
   0   1  -7 1564.27 72.5945   5
   0   1   7 1577.80 73.3017   5
  -1  -1  -7 2128.52 100.883   8
  -1  -1  -7 1999.28 100.837  10
   1  -1   7 1883.92 100.770   5
  -1  -1  -7 2198.32 100.847   5
   1   1   7 2119.15 101.124   5
  -1   1  -7 2096.12 100.541   5
   2  -1   7 488.646 26.8539   5
  -2  -1  -7 517.307 26.6615  10
  -2  -1  -7 541.887 26.7586   5
  -2  -1  -7 503.522 26.2901   8
   2   1   7 540.475 27.1709   5
  -2   1  -7 507.655 26.4718   5
  -2   1  -7 514.249 26.6874  10
  -3  -1  -7 471.195 24.1653  10
  -3   1  -7 427.274 23.9811   5
   3   1   7 456.585 24.7227   5
  -3   1  -7 466.755 24.1994  10
   4  -1   7 126.147 7.30768   2
  -4  -1  -7 137.101 9.18590  10
  -4   1  -7 136.677 9.13028  10
   4   1   7 129.914 9.75468   5
   5  -1   7 109.714 8.23580   2
  -5  -1  -7 144.587 9.91691  10
  -5  -1  -7 150.261 8.50195   8
   5   1   7 133.251 10.4063   5
  -5   1  -7 144.471 9.98100  10
  -5   1  -7 133.045 9.01705   8
  -6  -1  -7 404.589 22.4465   3
  -6  -1  -7 415.130 23.2610  10
  -6  -1  -7 368.390 21.2249   8
  -6   1  -7 413.830 22.5970   3
  -6   1  -7 422.560 23.1006  10
  -7  -1  -7 81.6577 7.83908   3
  -7  -1  -7 84.6765 8.69492  10
  -7   1  -7 87.2305 8.30179   3
  -7   1  -7 89.8362 8.62879  10
  -8  -1  -7 2.56197 3.95822  10
  -8  -1  -7 -2.7419 3.25240   3
  -8   1  -7 3.00304 3.97114  10
  -8   1  -7 1.74328 3.78676   3
  -9  -1  -7 25.5596 5.09735   3
  -9   1  -7 24.7433 5.13923   3
  -9   1  -7 22.7504 4.71432  10
  10  -1   7 15.5309 4.05563   6
 -10  -1  -7 26.0749 4.28940   3
 -10   1  -7 23.9900 4.36263   3
  11  -1   7 12.1066 3.29163   6
 -11   1  -7 19.5290 4.76958   3
  11   1   7 20.7184 4.67947   6
 -12  -2   7 1.70253 1.67838   9
  12   2  -7 -0.2156 2.54573   4
 -12   2   7 -1.9077 1.24178   9
 -11  -2   7 1.83100 1.97149   9
  11  -2  -7 -5.3943 2.83939   4
  11  -2  -7 6.44976 2.28667   6
  11   2  -7 6.66896 3.74914   4
  10  -2  -7 6.39522 2.57044   6
 -10  -2   7 6.68548 2.54045   9
  10  -2  -7 12.4633 3.70956   4
  10   2  -7 1.45461 3.81066   4
   9  -2  -7 22.4812 4.88951   4
  -9  -2   7 23.9747 3.26811   9
   9   2  -7 25.7953 5.66278   4
  -8  -2   7 0.24969 1.80943   9
   8  -2  -7 10.7814 4.26086   4
   8  -2  -7 2.75336 2.29555   6
   7  -2  -7 270.443 16.0220   7
   7  -2  -7 290.100 16.1062   6
  -7  -2   7 283.877 14.8880   9
   7  -2  -7 286.399 17.2476   4
  -7   2   7 284.753 19.6587   8
  -6  -2   7 291.657 16.4148   5
   6  -2  -7 320.386 16.6240   6
   6  -2  -7 317.845 17.9447   4
   6  -2  -7 303.880 17.0635   7
  -6  -2   7 305.289 15.6757   9
  -6   2   7 308.575 17.2653   8
   6   2  -7 281.030 15.9952   8
  -5  -2   7 6.84759 1.74201   5
  -5  -2   7 9.41115 1.68013   9
   5  -2  -7 10.9818 2.61892   7
   5  -2  -7 9.73129 2.15705   6
   5  -2  -7 9.07920 3.33716   4
  -5   2   7 8.73897 2.63332   8
   5   2  -7 8.76530 1.65772   8
  -4  -2   7 166.024 9.02407   9
   4  -2  -7 166.921 10.9576   4
  -4  -2   7 173.427 9.00540   5
   4   2  -7 165.289 9.59351   8
  -4   2   7 180.849 10.5773   8
   3  -2  -7 202.706 12.3220   4
   3  -2  -7 197.766 11.7250   8
   3   2  -7 198.589 11.2279   8
  -3   2   7 220.649 12.0314   8
   2  -2  -7 69.3838 5.42465   8
  -2   2   7 83.3266 5.37919   5
  -2   2   7 83.0518 5.79159   8
   2   2  -7 75.2533 5.29940   8
   1  -2  -7 67.7011 5.03471   8
   1   2  -7 68.0409 5.02750   8
  -1   2   7 70.8582 5.23608   8
  -1   2   7 69.5463 4.89508   5
   0  -2  -7 10.7755 2.03207   8
   0  -2  -7 9.91984 1.74918  10
   0  -2  -7 9.25580 1.79766   5
   0   2   7 9.70537 2.12170   5
   0   2  -7 9.18716 1.38747   5
   1  -2   7 211.634 11.7778   2
  -1  -2  -7 218.036 11.5594   5
  -1  -2  -7 198.485 11.3297  10
  -1  -2  -7 197.369 11.2623   8
   1   2   7 209.301 11.9272   5
  -1   2  -7 197.550 11.1340   5
   2  -2   7 1066.88 55.8643   2
  -2  -2  -7 1174.74 56.8922   5
  -2  -2  -7 1179.91 56.7962  10
  -2  -2  -7 1161.40 56.3335   8
  -2   2  -7 1111.94 56.6458   5
   2   2   7 1171.24 57.3321   5
  -3  -2  -7 228.041 12.6042  10
  -3  -2  -7 193.675 11.6615   3
  -3  -2  -7 207.905 11.5485   8
   3  -2   7 210.046 11.6360   2
   3   2   7 213.010 13.1085   5
  -3   2  -7 192.121 12.2688   5
  -3   2  -7 226.359 12.6691  10
  -4  -2  -7 30.8905 4.00828   3
  -4  -2  -7 34.8174 3.54745   8
  -4  -2  -7 39.0798 5.02900  10
   4  -2   7 43.3147 3.38855   2
   4   2   7 36.3115 5.40483   5
  -4   2  -7 37.5100 4.88395  10
  -4   2  -7 41.5344 4.32840   8
  -5  -2  -7 69.7347 6.98167  10
  -5  -2  -7 63.4946 4.61425   8
  -5  -2  -7 55.1683 5.58841   3
   5  -2   7 63.0369 4.46022   2
   5   2   7 53.1121 6.68119   5
  -5   2  -7 67.7262 6.50293  10
  -5   2  -7 69.4302 6.06394   8
  -6  -2  -7 14.4865 3.46311   3
  -6  -2  -7 17.8979 4.52283  10
  -6   2  -7 16.0010 4.41658   8
  -6   2  -7 16.7783 4.17372   3
  -6   2  -7 18.4086 4.31463  10
  -7  -2  -7 71.2244 7.34478   3
  -7  -2  -7 77.9774 8.29624  10
  -7   2  -7 79.1488 7.80832   3
  -7   2  -7 77.6130 8.08707  10
   8  -2   7 15.8238 4.34897   6
  -8  -2  -7 11.1785 4.63267  10
  -8  -2  -7 13.5941 3.94896   3
  -8   2  -7 16.3578 4.82059   3
  -8   2  -7 18.4152 6.37743  10
   9  -2   7 1.20883 3.60181   6
  -9  -2  -7 2.51628 3.22638   3
  -9   2  -7 -1.0204 2.85511  10
  -9   2  -7 0.54461 3.57644   3
  10  -2   7 6.50911 3.20172   6
 -10   2  -7 7.29652 3.85239   3
 -11  -2  -7 4.61174 1.39089   9
  11  -2   7 7.41971 2.97852   6
 -11   2  -7 3.34020 2.36346   3
 -12  -3   7 6.38989 1.88108   9
  12   3  -7 7.88390 3.59637   4
 -12   3   7 2.56811 2.04674   9
  11  -3  -7 10.7148 2.76909   6
 -11  -3   7 9.70363 2.55077   9
  11   3  -7 7.37317 3.70976   4
 -10  -3   7 -0.7182 2.06799   9
  10  -3  -7 5.61100 2.58361   6
  10   3  -7 -0.8565 4.19766   4
  -9  -3   7 13.8010 2.81003   9
   9  -3  -7 11.5834 3.99156   4
   9  -3  -7 16.5670 3.83777   6
  -8  -3   7 205.877 10.8366   9
   8  -3  -7 183.225 12.6365   4
   8  -3  -7 172.076 11.7897   6
   7  -3  -7 207.643 13.5049   4
   7  -3  -7 198.231 12.4000   6
  -7  -3   7 205.421 11.3125   9
  -6  -3   7 241.832 12.5692   9
   6  -3  -7 243.387 13.7059   6
   6  -3  -7 230.692 15.8012   7
   6  -3  -7 211.697 18.1628   4
  -6   3   7 235.178 14.2163   8
   5  -3  -7 29.8005 5.02331   4
   5  -3  -7 29.8865 3.90784   6
  -5  -3   7 30.2310 2.84034   9
   5  -3  -7 21.3243 3.58984   7
  -5  -3   7 27.5941 2.40723   5
  -5   3   7 30.7125 4.29691   8
   5   3  -7 24.0557 2.52285   8
  -4  -3   7 49.5508 3.46464   9
   4  -3  -7 48.1550 4.25752   6
   4  -3  -7 50.6619 5.38579   4
  -4  -3   7 46.2838 2.69767   5
   4  -3  -7 42.4493 4.72448   7
   4   3  -7 38.0671 3.47717   8
   3  -3  -7 337.907 18.3047   6
  -3  -3   7 338.321 17.4115   9
  -3  -3   7 314.827 17.4926   2
   3  -3  -7 361.612 19.4160   4
  -3   3   7 382.231 18.5434   5
   3   3  -7 318.907 17.8141   8
  -3   3   7 364.222 18.8534   8
  -2  -3   7 1075.29 54.6774   9
  -2  -3   7 1057.31 54.9800   2
   2  -3  -7 1078.61 55.7627   8
   2   3  -7 1119.69 55.4779   8
  -2   3   7 1195.67 56.0112   8
  -2   3   7 1223.75 55.7811   5
  -1  -3   7 1913.49 96.0178   2
   1  -3  -7 1940.25 96.5732   8
  -1  -3   7 1863.09 95.6145   9
   1  -3  -7 1966.33 97.4799   7
  -1   3   7 2051.30 96.6828   8
  -1   3   7 2140.14 96.7650   5
   0  -3  -7 44.9124 4.08268   6
   0  -3   7 42.0727 3.03814   9
   0  -3   7 42.1088 3.51234   2
   0  -3  -7 42.0845 3.70007   8
   0   3   7 46.6767 3.86135   8
   0   3  -7 47.4988 3.01142   5
   0   3   7 46.3025 4.38178   5
  -1  -3  -7 116.606 7.12311  10
  -1  -3  -7 120.937 7.16294   8
   1  -3   7 118.315 7.05901   2
   1   3   7 130.169 8.26892   5
  -1   3  -7 114.363 7.10778   5
  -2  -3  -7 154.469 8.93173   8
   2  -3   7 151.881 8.93045   2
  -2  -3  -7 160.378 9.57122  10
  -2  -3  -7 162.174 9.67632   6
   2  -3   7 159.668 8.59884   9
   2  -3   7 170.973 10.2967   6
   2   3   7 169.925 10.5564   5
  -2   3  -7 154.660 9.60924   5
  -3  -3  -7 95.1613 6.82154  10
   3  -3   7 91.6474 6.88755   6
   3  -3   7 87.8657 5.83758   2
  -3  -3  -7 85.7182 5.52105   8
   3   3   7 96.1047 7.51499   5
  -3   3  -7 87.5631 6.91362  10
  -3   3  -7 94.4433 6.89903   8
  -4  -3  -7 51.6655 4.57533   3
   4  -3   7 52.7217 4.23999   2
  -4  -3  -7 52.6044 3.78204   8
  -4  -3  -7 53.3159 3.71125   8
  -4  -3  -7 52.4150 5.86475  10
  -4   3  -7 57.2211 5.58777  10
  -4   3  -7 60.6083 5.53946   8
   4   3   7 52.6061 6.17213   5
   5  -3   7 53.3214 5.96105   6
   5  -3   7 49.2910 4.04303   2
  -5  -3  -7 51.8614 7.08611  10
  -5  -3  -7 42.7031 5.11825   3
  -5   3  -7 53.0283 5.52707   8
   5   3   7 49.9432 6.26684   5
  -5   3  -7 50.1575 6.31684  10
   6  -3   7 3.46079 2.25304   2
   6  -3   7 6.03458 3.60803   6
  -6  -3  -7 6.90117 2.95781   3
  -6  -3  -7 6.16680 3.63432  10
  -6   3  -7 6.69984 3.54871  10
  -6   3  -7 5.56648 3.53262   3
  -7  -3  -7 113.974 9.57302  10
   7  -3   7 107.966 9.22440   6
  -7   3  -7 118.950 9.54416   3
  -7   3  -7 97.1003 8.90643  10
   8  -3   7 80.7276 8.38502   6
  -8  -3  -7 75.0877 7.17832   3
  -8   3  -7 88.5718 7.99336  10
  -8   3  -7 86.5194 8.51988   3
   9  -3   7 25.5381 6.01149   6
  -9   3  -7 36.3921 6.92246   3
  -9   3  -7 30.4023 4.66321  10
 -10  -3  -7 0.96078 1.58976   9
  10  -3   7 -1.4159 3.08877   6
 -10   3  -7 -3.6627 2.60646   3
 -12  -4   7 0.75216 1.42696   9
  12   4  -7 4.19168 2.63021   4
  11  -4  -7 -2.1414 2.08888   6
 -11  -4   7 2.32511 2.12272   9
  11   4  -7 3.23077 3.36245   4
 -10  -4   7 -1.0532 2.17736   9
  10   4  -7 2.22307 3.72116   4
   9  -4  -7 170.086 11.9267   6
  -9  -4   7 206.009 11.0352   9
   8  -4  -7 92.9174 9.53260   6
  -8  -4   7 107.625 7.10697   9
  -7  -4   7 473.658 24.0261   9
   7  -4  -7 463.394 25.2610   6
  -6  -4   7 406.537 20.4394   9
   6  -4  -7 410.696 21.8049   6
  -6   4   7 370.636 22.0306   8
   5  -4  -7 149.762 10.7352   7
  -5  -4   7 177.656 9.43162   9
   5  -4  -7 184.408 10.8925   6
  -5  -4   7 153.308 9.25762   2
  -5   4   7 173.190 10.9659   8
  -4  -4   7 46.9819 3.71383   9
   4  -4  -7 43.3988 4.90502   6
   4  -4  -7 55.7638 4.85574   7
  -4  -4   7 46.5926 3.63085   2
   4   4  -7 40.9987 3.32793   8
  -4   4   7 46.9390 5.10536   8
  -3  -4   7 1.70043 1.37095   9
   3  -4  -7 -3.2501 1.53565   6
  -3   4   7 3.16537 2.61130   8
  -3   4   7 1.63951 1.86364   5
   3   4  -7 2.13275 1.20843   8
   2  -4  -7 27.0120 3.60330   6
  -2  -4   7 24.7919 2.62464   9
  -2  -4   7 27.9322 3.04934   2
  -2   4   7 24.0001 3.36081   8
  -2   4   7 27.2260 3.76996   5
   2   4  -7 23.1131 2.82599   8
  -1  -4   7 119.701 7.63690   2
   1  -4  -7 127.559 8.00683   8
  -1  -4   7 130.888 7.26914   9
   1  -4  -7 132.675 8.50753   6
  -1   4   7 139.168 8.50639   5
  -1   4   7 135.740 8.21987   8
   0  -4   7 183.902 10.4202   2
   0  -4  -7 176.100 10.3932   8
   0  -4   7 183.363 9.84271   9
   0  -4  -7 188.690 11.1175   6
   0   4   7 201.558 11.4058   5
   0   4   7 185.206 10.4347   8
   0   4  -7 173.684 9.84659   5
   0   4  -7 193.765 9.59739   5
  -1  -4  -7 4.65288 1.27861  10
   1  -4   7 1.85678 1.72296   2
   1  -4   7 1.37018 1.72300   6
   1  -4   7 3.18394 1.36317   9
  -1  -4  -7 2.09760 1.26566   8
  -1  -4  -7 4.68334 2.10133   6
   1   4   7 4.55459 2.54364   5
  -1   4  -7 1.61674 1.26989   5
  -2  -4  -7 40.4811 3.09466   8
  -2  -4  -7 42.3099 4.07250   9
   2  -4   7 41.9983 3.31278   9
   2  -4   7 41.0305 4.03183   2
  -2  -4  -7 43.1975 3.86265  10
  -2  -4  -7 43.8574 4.34058   6
   2  -4   7 42.5118 4.32258   6
   2   4   7 44.0333 5.06399   5
  -2   4  -7 33.7479 3.92078   5
  -2   4  -7 40.3473 4.42875   8
  -3  -4  -7 4.23105 1.95974  10
  -3  -4  -7 5.91511 0.94478   8
  -3  -4  -7 3.48515 1.26162   9
   3  -4   7 5.47765 2.09332   2
   3  -4   7 -0.8239 2.31861   6
  -3   4  -7 2.92925 2.33864  10
   3   4   7 4.21933 2.46182   5
  -3   4  -7 5.91650 2.30501   8
  -4  -4  -7 140.786 8.19092   9
   4  -4   7 145.432 10.2780   6
   4  -4   7 154.352 8.98693   2
  -4  -4  -7 156.856 10.0858  10
   4   4   7 130.861 12.7406   5
  -4   4  -7 154.899 10.0450  10
  -4   4  -7 156.346 12.9356   8
  -5  -4  -7 201.747 11.3316   9
  -5  -4  -7 204.073 12.2297   3
   5  -4   7 194.243 13.4626   6
   5  -4   7 208.057 11.8060   2
  -5  -4  -7 222.523 13.5165  10
  -5   4  -7 232.519 13.4080  10
   6  -4   7 174.432 10.2279   2
   6  -4   7 160.838 15.9513   6
  -6  -4  -7 184.457 10.2204   9
  -6  -4  -7 173.006 11.0055   3
  -6   4  -7 193.391 12.1447  10
  -6   4  -7 192.011 15.3578   3
  -7  -4  -7 2.65550 2.07651   9
   7  -4   7 5.37435 3.94084   6
  -7   4  -7 -0.4454 3.44851   3
  -7   4  -7 1.55061 2.69776  10
   8  -4   7 16.6433 4.39542   6
  -8  -4  -7 20.9469 3.01320   9
  -8   4  -7 21.7097 4.90167   3
  -8   4  -7 23.9491 4.42498  10
   9  -4   7 -4.1549 2.92684   6
  -9  -4  -7 -2.3345 1.68296   9
  -9   4  -7 -2.1147 2.08313  10
  -9   4  -7 -0.1628 3.21693   3
 -10  -4  -7 11.3532 2.48346   9
  10  -4   7 13.5074 3.54549   6
 -10   4  -7 14.2111 3.46020   3
 -11  -5   7 -0.4610 1.52870   9
  11  -5  -7 -0.2830 1.75266   6
  11   5  -7 4.35811 3.00881   4
  10  -5  -7 1.92347 2.59713   6
 -10  -5   7 2.56645 2.19965   9
  10   5  -7 -0.2189 3.55424   4
  -9  -5   7 41.5565 4.51440   9
   9  -5  -7 43.8936 5.69081   6
   8  -5  -7 160.793 11.2445   6
  -8  -5   7 179.008 10.1481   9
  -7  -5   7 31.1657 3.68051   9
   7  -5  -7 28.1033 5.01981   6
   6  -5  -7 5.76716 3.29421   6
  -6  -5   7 12.1642 2.57857   9
   5  -5  -7 103.886 8.03515   6
  -5  -5   7 107.988 6.65386   9
  -5  -5   7 98.3988 6.28844   2
  -5   5   7 99.6663 7.77756   5
  -5   5   7 100.485 7.93493   8
  -4  -5   7 392.596 21.2286   2
   4  -5  -7 441.303 22.8423   6
  -4  -5   7 441.405 21.2544   9
  -4   5   7 434.461 22.7631   5
   4   5  -7 384.130 20.4291   8
  -4   5   7 405.479 22.7592   8
  -3  -5   7 214.616 11.4569   9
  -3  -5   7 212.307 11.7725   2
   3  -5  -7 217.250 15.7225   6
   3   5  -7 193.070 11.3093   8
  -3   5   7 222.706 12.8749   8
  -3   5   7 220.569 12.8963   5
   2  -5  -7 11.7061 3.01535   6
  -2  -5   7 9.44590 1.90279   9
  -2  -5   7 11.7746 2.42225   2
  -2   5   7 12.0258 2.84469   5
  -2   5   7 8.38087 2.35465   8
   2   5  -7 9.26627 1.94171   8
  -1  -5   7 192.871 10.6675   2
  -1  -5   7 176.065 10.4648   6
   1  -5  -7 202.333 11.6460   6
  -1  -5   7 194.105 10.0836   9
  -1   5   7 185.009 11.4404   5
   1   5  -7 165.930 9.47323   5
  -1   5   7 186.824 10.8495   8
   1   5  -7 190.652 9.46194   5
   0  -5   7 580.827 28.4037   9
   0  -5  -7 594.958 29.9161   6
   0  -5  -7 531.634 28.8146   8
   0  -5   7 611.644 29.1126   2
   0  -5   7 549.465 29.1480   6
   0   5  -7 609.589 28.3095   5
   0   5   7 581.492 30.0268   5
   0   5   7 548.408 28.8145   8
   0   5  -7 593.604 29.4411   8
   0   5  -7 504.771 28.5124   5
   1  -5   7 28.7564 3.50683   6
  -1  -5  -7 32.2644 2.73684   8
  -1  -5  -7 27.0781 4.23335   6
   1  -5   7 30.7781 3.68782   2
   1  -5   7 31.6838 3.17133   9
  -1   5  -7 27.1674 2.64457   5
  -1   5  -7 19.0742 3.23099   8
   1   5   7 28.0284 4.28047   5
  -1   5  -7 20.0601 3.01282   5
  -2  -5  -7 65.6386 3.59754   8
  -2  -5  -7 64.6355 3.93110   9
  -2  -5  -7 58.3949 5.70723   6
   2  -5   7 68.3263 4.58592   9
   2  -5   7 62.0473 5.23588   2
   2  -5   7 65.1077 5.64253   6
  -2   5  -7 57.5780 5.52683   8
   2   5   7 58.6644 6.12163   5
   3  -5   7 409.556 20.7143   2
   3  -5   7 390.325 21.5892   6
  -3  -5  -7 380.187 19.6540   9
   3   5   7 369.949 22.2962   5
  -3   5  -7 402.908 21.4238  10
  -3   5  -7 398.649 24.0159   8
  -4  -5  -7 660.981 33.7173   9
   4  -5   7 691.431 34.5979   2
   4  -5   7 702.522 35.9720   6
  -4   5  -7 677.123 35.4095  10
   5  -5   7 199.036 11.2813   2
  -5  -5  -7 188.003 10.4924   9
   5  -5   7 195.998 13.0378   6
  -5   5  -7 187.680 12.2338  10
  -6  -5  -7 133.640 8.06791   9
   6  -5   7 155.294 10.9889   6
   6  -5   7 117.450 9.77100   2
  -6   5  -7 155.648 10.3646   3
  -6   5  -7 129.027 9.60841  10
  -7  -5  -7 20.7372 2.72815   9
   7  -5   7 26.2445 5.09551   6
  -7   5  -7 22.7529 4.13500  10
  -7   5  -7 29.6473 5.10807   3
  -8  -5  -7 3.68443 2.50655   9
   8  -5   7 3.97857 3.40688   6
  -8   5  -7 2.63393 4.22317   3
  -8   5  -7 6.42830 2.69717  10
   9  -5   7 1.96028 3.21196   6
  -9  -5  -7 2.60146 1.74527   9
  -9   5  -7 -0.4911 2.59784   3
  10  -5   7 8.21642 2.55101   6
 -10  -5  -7 8.93032 1.46603   9
 -10   5  -7 10.7936 2.52312   3
  11  -6  -7 4.63258 2.59219   6
 -11  -6   7 0.42514 1.26622   9
  11   6  -7 1.24842 2.47100   4
  10  -6  -7 4.77749 2.34824   6
 -10  -6   7 3.08989 1.97358   9
  10   6  -7 4.30600 3.13572   4
  -9  -6   7 20.1073 4.52143   9
   9  -6  -7 18.7175 3.75046   6
  -8  -6   7 63.9281 5.47262   9
   8  -6  -7 66.5074 6.87320   6
  -7  -6   7 68.8474 5.73314   9
   7  -6  -7 69.2080 7.26903   6
   6  -6  -7 -3.7978 3.12714   6
  -6  -6   7 0.80518 2.06879   9
   5  -6  -7 15.0584 3.94204   6
  -5  -6   7 15.5232 2.41755   2
  -5  -6   7 12.2338 2.50982   9
   4  -6  -7 40.2690 5.41642   6
  -4  -6   7 28.9953 3.51063   2
  -4  -6   7 34.8712 3.77949   9
  -4   6   7 25.4941 3.78118   8
  -3  -6   7 24.3372 3.01967   9
   3  -6  -7 25.8093 4.46475   6
  -3  -6   7 22.1525 3.14006   2
  -3  -6   7 15.2805 3.52640   6
  -3   6   7 29.7503 4.33955   5
  -3   6   7 14.6866 2.95480   8
   2  -6  -7 101.872 7.92302   6
  -2  -6   7 90.9265 6.47664   6
  -2  -6   7 100.091 6.86309   2
  -2  -6   7 106.006 6.26831   9
  -2   6   7 93.7144 7.71526   5
  -2   6   7 96.9263 7.12283   8
   2   6  -7 97.0878 6.20439   8
  -1  -6   7 143.112 8.14344   9
   1  -6  -7 153.362 9.83954   6
  -1  -6   7 136.346 8.59811   6
  -1  -6   7 144.213 8.73232   2
  -1   6   7 144.115 10.9746   5
  -1   6   7 131.055 8.61923   8
   1   6  -7 123.954 7.43294   5
   1   6  -7 151.719 9.46240   8
   0  -6   7 37.4489 4.46571   6
   0  -6  -7 40.9165 5.35664   6
   0  -6   7 49.6045 4.00112   9
   0  -6   7 43.3777 4.71899   2
   0   6  -7 46.1733 4.30828   8
   0   6  -7 45.6087 3.41810   5
   1  -6   7 36.6038 4.55127   6
   1  -6   7 38.3059 4.61430   2
   1  -6   7 36.6554 3.54627   9
  -1  -6  -7 41.3636 5.17875   6
  -1  -6  -7 31.2833 2.65967   9
  -1   6  -7 37.7083 3.31379   5
   1   6   7 39.0165 5.12562   5
  -1   6  -7 35.6225 4.23900   8
  -2  -6  -7 67.9600 6.29146   6
   2  -6   7 56.1311 4.51784   9
   2  -6   7 56.4937 5.69800   6
  -2  -6  -7 55.7933 3.76947   9
   2  -6   7 61.0190 5.55973   2
  -2   6  -7 55.4914 4.54307   5
   2   6   7 71.4627 11.0495   5
  -2   6  -7 49.2493 5.41407   8
   3  -6   7 203.617 11.5721   2
   3  -6   7 194.903 12.3720   6
  -3  -6  -7 178.239 10.0135   9
  -3   6  -7 185.458 11.6567  10
   4  -6   7 -1.4989 3.01632   6
  -4  -6  -7 -1.7952 1.36112   9
   4  -6   7 -0.4107 2.24974   2
  -4   6  -7 0.29650 2.04368  10
   5  -6   7 7.50037 3.63668   6
   5  -6   7 3.28466 2.45331   2
  -5  -6  -7 6.52099 1.90518   9
  -5   6  -7 4.23998 2.53742  10
  -6  -6  -7 2.76653 1.80269   9
   6  -6   7 1.76869 2.13761   2
   6  -6   7 5.92557 3.99442   6
  -6   6  -7 2.21697 3.10817   3
  -6   6  -7 0.44090 2.45902  10
   7  -6   7 3.44513 3.41981   6
  -7  -6  -7 6.57652 1.92660   9
  -7   6  -7 -0.6406 2.81396   3
  -7   6  -7 5.34125 3.18723  10
  -8  -6  -7 13.6734 2.11962   9
   8  -6   7 15.5763 3.94269   6
  -8   6  -7 9.89049 3.49830   3
   9  -6   7 3.76981 2.99656   6
  -9  -6  -7 5.65041 1.37629   9
  -9   6  -7 7.91256 3.30853   3
  10  -7  -7 7.75073 1.89654   6
 -10  -7   7 7.61923 1.95437   9
  10   7  -7 4.68196 2.86952   4
  -9  -7   7 3.95889 2.02183   9
   9  -7  -7 2.15921 2.62466   6
   8  -7  -7 7.14041 4.35459   6
  -8  -7   7 5.81740 3.21458   9
   7  -7  -7 17.8095 4.37880   6
  -7  -7   7 13.7010 2.86689   9
  -6  -7   7 153.606 9.11381   9
   6  -7  -7 136.344 10.8002   6
  -5  -7   7 11.7179 2.44942   2
  -5  -7   7 11.2662 2.65603   9
   5  -7  -7 17.3219 4.43412   6
  -4  -7   7 5.30235 2.12104   2
  -4  -7   7 7.47433 2.85379   9
   3  -7  -7 37.0655 5.22958   6
  -3  -7   7 32.1066 4.13469   6
  -3  -7   7 41.8224 4.31284   9
  -3  -7   7 38.4328 4.33483   2
   2  -7  -7 464.612 25.0447   6
  -2  -7   7 445.199 23.6677   2
  -2  -7   7 426.386 23.3779   6
  -2  -7   7 464.489 23.0483   9
  -1  -7   7 177.296 9.66015   9
   1  -7  -7 161.076 11.3873   6
  -1  -7   7 154.549 10.0131   6
  -1  -7   7 167.469 10.4757   2
   0  -7  -7 371.969 20.6991   6
   0  -7   7 363.646 18.8287   9
   0  -7   7 367.935 19.8641   6
   0  -7   7 386.402 19.9324   2
   0   7  -7 321.651 21.3958   8
   1  -7   7 564.838 29.0498   2
   1  -7   7 547.822 29.3322   6
   1  -7   7 565.280 28.0888   9
  -1  -7  -7 544.111 29.6947   6
  -2  -7  -7 51.5612 6.07135   6
   2  -7   7 28.2184 4.25733   2
  -2  -7  -7 43.1825 3.09973   9
   2  -7   7 41.6318 4.20405   9
   2  -7   7 43.4834 5.68150   6
  -2   7  -7 41.0518 4.48937  10
  -3  -7  -7 11.6454 1.78010   9
   3  -7   7 14.9270 3.26605   2
   3  -7   7 9.28819 5.19151   6
  -3   7  -7 7.69355 2.43637  10
   4  -7   7 5.37516 3.71556   6
  -4  -7  -7 7.08573 1.73395   9
   4  -7   7 9.34618 2.98181   2
  -4   7  -7 10.0679 2.47136  10
   5  -7   7 108.527 9.24708   6
  -5  -7  -7 100.273 6.23739   9
   5  -7   7 107.762 7.62399   2
  -5   7  -7 106.626 8.13490   3
   6  -7   7 25.7377 3.44119   2
   6  -7   7 33.7284 5.37375   6
  -6  -7  -7 32.4248 3.55548   9
  -6   7  -7 35.7770 4.95526   3
  -7  -7  -7 30.1578 2.83988   9
   7  -7   7 22.2638 4.30343   6
  -7   7  -7 27.0588 4.10457   3
  -8  -7  -7 120.388 6.63455   9
   8  -7   7 122.100 8.69989   6
  -9  -8   7 -1.4284 1.45264   9
   9  -8  -7 1.10434 1.85849   6
   8  -8  -7 8.78659 3.03497   6
  -8  -8   7 5.46994 2.06554   9
  -7  -8   7 5.31801 2.42355   9
   7  -8  -7 6.04295 3.22638   6
   6  -8  -7 5.94009 3.47246   6
  -6  -8   7 2.47400 2.38674   9
  -5  -8   7 2.06327 2.00726   2
  -5  -8   7 6.89032 2.43824   9
   5  -8  -7 5.89651 3.95043   6
  -4  -8   7 28.4735 3.63351   2
   4  -8  -7 51.0165 6.48439   6
  -4  -8   7 40.6970 4.41550   9
  -3  -8   7 11.0609 2.97631   2
   3  -8  -7 1.59036 3.34722   6
  -3  -8   7 3.32867 2.44211   9
  -2  -8   7 24.4020 3.35264   9
   2  -8  -7 25.6788 4.90826   6
  -2  -8   7 18.1270 3.02555   6
  -2  -8   7 17.9294 3.44618   2
  -1  -8   7 14.6702 2.97112   6
   1  -8  -7 19.7738 4.34667   6
  -1  -8   7 13.8337 3.36661   2
  -1  -8   7 17.4462 2.95600   9
   0  -8   7 40.1619 4.93319   2
   0  -8   7 37.3666 6.31052   6
   0  -8   7 42.2634 4.17019   9
   0  -8  -7 33.3371 5.25567   6
   1  -8   7 231.224 13.3795   2
  -1  -8  -7 223.117 14.1794   6
   1  -8   7 212.548 12.1230   9
   1  -8   7 210.134 13.3459   6
   2  -8   7 129.478 9.93415   6
   2  -8   7 149.475 8.50829   9
   2  -8   7 135.048 9.55390   2
  -2  -8  -7 138.888 10.1869   6
   3  -8   7 24.4002 4.37416   6
   3  -8   7 21.2448 3.79919   2
   4  -8   7 2.19209 3.14441   6
  -4  -8  -7 1.80748 1.32127   9
   4  -8   7 7.07980 2.79399   2
  -4   8  -7 -0.9542 2.33491   3
  -5  -8  -7 10.3943 1.67758   9
  -5   8  -7 17.3063 3.12525   3
   6  -8   7 5.17172 3.30060   6
  -6  -8  -7 -3.0008 2.31648   9
   6  -8   7 1.68747 1.91072   2
  -6   8  -7 2.24414 2.19426   3
   7  -8   7 0.57735 2.83070   6
  -7   8  -7 11.7543 2.37102   3
   8  -9  -7 27.9833 3.55416   6
   7  -9  -7 26.2645 4.06299   6
  -7  -9   7 28.4650 3.10373   9
  -6  -9   7 78.6715 5.78950   9
   6  -9  -7 84.2069 7.33087   6
  -5  -9   7 33.8275 5.00196   9
   5  -9  -7 39.6469 6.84903   6
  -4  -9   7 37.6231 4.20837   9
  -4  -9   7 33.7091 3.95469   2
   4  -9  -7 42.9629 5.89330   6
  -3  -9   7 45.0810 4.90967   2
  -3  -9   7 44.9475 4.45278   9
   3  -9  -7 57.2031 6.85358   6
  -2  -9   7 174.360 11.2240   2
  -2  -9   7 181.801 10.5723   9
   2  -9  -7 194.677 12.7096   6
  -1  -9   7 123.792 7.64382   9
   1  -9  -7 120.195 9.70519   6
  -1  -9   7 111.822 7.88774   6
  -1  -9   7 128.108 8.72228   2
   0  -9   7 25.7699 3.65585   6
   0  -9  -7 25.3413 4.44253   6
   0  -9   7 20.7985 3.84084   2
   0  -9   7 25.3756 3.19056   9
   1  -9   7 19.4137 2.86149   9
   1  -9   7 23.7934 3.93836   6
  -1  -9  -7 20.9014 4.36569   6
   1  -9   7 13.8319 3.34320   2
   2  -9   7 26.4639 4.26216   2
  -2  -9  -7 21.2203 4.11829   6
   2  -9   7 24.0564 4.08545   6
   2  -9   7 25.2410 3.01510   9
   3  -9   7 3.13692 2.54653   2
   4  -9   7 -0.2153 2.16591   2
   4  -9   7 3.54349 2.79107   6
   5  -9   7 39.4928 4.16324   2
   5  -9   7 31.2087 4.38989   6
   6  -9   7 27.0563 4.57213   6
   6 -10  -7 1.31258 1.98262   6
  -6 -10   7 0.36201 1.52847   9
   5 -10  -7 4.89669 2.56571   6
  -5 -10   7 2.87072 1.81325   9
   4 -10  -7 2.72171 2.68716   6
  -4 -10   7 0.59451 1.84034   9
  -3 -10   7 0.06112 1.95471   2
  -3 -10   7 3.81166 1.84214   9
   3 -10  -7 0.01623 2.51065   6
  -2 -10   7 10.8195 2.86597   2
  -2 -10   7 9.68560 2.22848   9
   2 -10  -7 9.57619 3.59904   6
   1 -10  -7 -2.8746 2.56700   6
  -1 -10   7 -1.4815 1.75024   9
  -1 -10   7 -0.2539 2.11684   2
   0 -10   7 18.9532 2.78671   6
   0 -10  -7 22.6453 3.99996   6
   0 -10   7 22.3123 3.53833   2
   0 -10   7 22.9471 2.96632   9
   1 -10   7 70.0616 5.22129   9
   1 -10   7 65.2548 5.67458   6
  -1 -10  -7 78.5812 6.71386   6
   1 -10   7 79.9912 6.35548   2
   2 -10   7 5.87656 2.39700   6
   2 -10   7 7.90267 2.73796   2
   3 -10   7 5.76950 2.64329   2
   3 -10   7 1.90570 2.27191   6
   4 -10   7 -3.1045 1.85317   2
   4 -10   7 -0.0005 1.83821   6
   5 -10   7 27.8909 3.39956   6
  -4 -11   7 5.51095 1.58294   9
   4 -11  -7 5.83364 2.27384   6
  -3 -11   7 3.41567 1.49613   9
   3 -11  -7 3.01393 2.03735   6
  -2 -11   7 3.53266 1.38403   9
   2 -11  -7 7.51203 2.84572   6
  -1 -11   7 52.0361 3.91478   9
   1 -11  -7 56.5263 5.30907   6
  -1 -11   7 54.7837 4.69935   2
   0 -11   7 58.5930 4.22914   9
   0 -11  -7 62.2496 5.40141   6
   0 -11   7 64.9434 5.18846   2
   1 -11   7 18.7716 2.89385   2
   2 -11   7 33.3923 4.65586   2
 -12   0   8 10.9140 1.79563   9
  12   0  -8 12.8197 3.75752   4
  11   0  -8 5.20152 3.93713   4
 -11   0   8 4.05802 2.01879   9
  10   0  -8 16.0111 4.71814   4
   9   0  -8 192.496 13.5755   4
   8   0  -8 91.6306 8.43134   4
  -8   0   8 72.7059 6.65371   8
  -7   0   8 8.09880 2.86068   8
   7   0  -8 5.69617 3.60821   4
   6   0  -8 1098.05 56.9684   4
  -6   0   8 1146.33 56.2206   8
   5   0  -8 1132.13 55.9870   4
  -5   0   8 1010.14 55.2081   5
  -5   0   8 1179.23 55.3472   8
   4   0  -8 742.582 37.6012   4
   4   0  -8 720.751 36.9472   8
  -4   0   8 648.936 36.6848   5
  -4   0   8 814.811 37.2634   8
  -3   0   8 1487.06 69.8134   8
   3   0  -8 1389.64 69.6523   8
   3   0  -8 1367.94 70.1108   4
   2   0  -8 6092.03 293.987   8
  -1   0   8 352.110 17.4744   5
   1   0  -8 335.929 18.2252   8
   0   0  -8 47.8774 3.29182   5
   0   0  -8 43.0948 3.94204   8
   0   0   8 41.0200 3.69423   5
  -1   0  -8 4767.58 220.122   5
   1   0   8 4349.80 220.435   5
  -2   0  -8 6259.31 306.517  10
  -2   0  -8 6458.80 305.243   5
   2   0   8 6254.77 305.756   5
  -3   0  -8 44.3250 4.69793  10
   3   0   8 38.1810 5.09495   5
  -4   0  -8 53.4999 5.61004  10
   4   0   8 47.2197 5.79544   5
   4   0   8 46.4415 3.38894   2
  -5   0  -8 63.4984 5.52196   8
  -5   0  -8 70.6173 7.55054  10
  -6   0  -8 292.140 17.2768   3
  -6   0  -8 288.171 17.0425   8
  -6   0  -8 304.874 17.9404  10
  -7   0  -8 40.1150 6.18151  10
  -7   0  -8 51.3150 9.20306   3
  -8   0  -8 59.2812 7.50007  10
  -8   0  -8 48.9213 6.70858   3
  -9   0  -8 36.9413 5.73163  10
  -9   0  -8 38.2124 5.57694   3
 -10   0  -8 52.9026 6.10756   3
 -11   0  -8 5.55210 2.28952   3
  11   0   8 9.97375 2.71195   6
 -12  -1   8 1.07991 1.59804   9
  12  -1  -8 -3.4360 2.58626   4
  12   1  -8 -1.4982 2.53629   4
 -12   1   8 0.54992 2.08486   9
 -11  -1   8 14.7217 2.38961   9
  11  -1  -8 5.25216 3.50989   4
  11   1  -8 15.9907 4.71644   4
 -11   1   8 14.9723 2.28094   9
  10  -1  -8 51.5696 7.06531   4
 -10  -1   8 43.1446 4.26479   9
  10   1  -8 39.9018 6.50413   4
   9  -1  -8 2.44322 3.26854   7
  -9  -1   8 3.05399 1.81881   9
   9  -1  -8 1.73696 2.40221   6
   9  -1  -8 6.83713 4.08762   4
   9   1  -8 6.88390 4.27933   4
   8  -1  -8 3.86438 2.22466   6
   8  -1  -8 7.59828 3.99206   4
  -8  -1   8 2.69005 2.66572   8
   8   1  -8 -0.8029 3.49507   4
  -7  -1   8 54.9435 5.32143   8
   7  -1  -8 67.0605 7.12459   4
   7  -1  -8 51.6356 4.83741   6
   7   1  -8 64.0099 7.09897   4
  -7   1   8 54.6519 5.42402   8
   6  -1  -8 344.696 18.1462   6
  -6  -1   8 327.111 18.7963   5
  -6  -1   8 340.692 18.7519   8
   6  -1  -8 341.380 19.8740   4
   6   1  -8 383.043 24.0752   4
  -6   1   8 350.106 19.1684   8
  -5  -1   8 1.37891 1.88151   8
  -5  -1   8 2.37365 1.52497   5
   5  -1  -8 -0.5777 2.47283   4
  -5  -1   8 -0.5404 1.03574   9
  -5   1   8 -1.7341 1.60182   5
   5   1  -8 -1.0505 2.50638   4
  -5   1   8 1.41699 1.97391   8
   4  -1  -8 201.759 12.5663   4
  -4  -1   8 211.365 11.8777   8
  -4  -1   8 197.980 11.1209   5
   4   1  -8 200.159 12.4840   4
   4   1  -8 201.470 11.6227   8
  -4   1   8 226.409 12.3182   8
  -3  -1   8 108.129 6.10448   5
   3  -1  -8 113.929 7.34426   8
   3  -1  -8 108.903 7.81471   7
   3  -1  -8 111.339 7.99013   4
  -3  -1   8 117.718 5.84913   5
   3   1  -8 108.971 7.66570   4
   3   1  -8 113.115 7.15939   8
  -3   1   8 112.276 7.62732   8
   2  -1  -8 32.7556 3.43718   8
  -2   1   8 27.4378 2.80346   5
  -2   1   8 32.4798 3.80964   8
   2   1  -8 25.6336 3.18264   8
  -1  -1   8 31.2930 2.33244   5
   1  -1  -8 35.6921 3.43502   8
  -1   1   8 37.6443 3.24693   5
   1   1  -8 33.9714 3.52088   8
   0  -1   8 0.76577 1.15637   5
   0  -1  -8 0.55148 1.40168   8
   0  -1  -8 -0.1254 1.09543   5
   0   1   8 -1.2328 1.46496   5
   0   1  -8 1.27935 0.85119   5
  -1  -1  -8 413.094 21.1299   8
   1  -1   8 372.920 20.9924   5
  -1  -1  -8 375.836 22.3968   7
  -1  -1  -8 431.154 21.0096   5
  -1  -1  -8 401.657 21.0970  10
   1   1   8 407.639 21.3489   5
  -1   1  -8 420.446 20.6838   5
   2  -1   8 123.384 8.42490   5
  -2  -1  -8 129.793 8.04906   5
  -2  -1  -8 124.746 8.23899  10
  -2  -1  -8 124.479 7.81860   8
  -2   1  -8 126.967 8.23252  10
   2   1   8 129.983 8.66689   5
  -2   1  -8 123.038 7.79277   5
   3  -1   8 53.9017 4.00493   2
  -3  -1  -8 60.1365 5.49527  10
  -3   1  -8 67.8432 5.82407  10
   3   1   8 67.9977 6.26717   5
   4  -1   8 138.483 7.87626   2
  -4  -1  -8 144.878 9.83893  10
   4   1   8 132.340 10.0780   5
  -4   1  -8 152.547 9.90408  10
   5  -1   8 2.74431 1.40970   2
  -5  -1  -8 5.34279 2.72601   3
  -5  -1  -8 6.42481 1.97825   8
  -5   1  -8 6.92094 2.52008   8
   5   1   8 2.11938 3.13435   5
  -6  -1  -8 -1.1871 1.94597   8
  -6  -1  -8 -2.0934 2.91049   3
  -6  -1  -8 -4.6045 3.11999  10
  -6   1  -8 2.03681 3.19850  10
  -6   1  -8 7.50520 2.58857   8
  -6   1  -8 4.65243 3.21479   3
  -7  -1  -8 22.4901 5.08528  10
  -7   1  -8 27.7187 5.32635  10
  -7   1  -8 26.7416 5.18677   3
  -8  -1  -8 -1.4419 3.58543  10
  -8  -1  -8 0.01843 3.31447   3
  -8   1  -8 -0.1511 3.48746  10
  -8   1  -8 -0.6259 3.44127   3
  -9  -1  -8 10.0452 4.08435   3
  -9   1  -8 7.53805 4.12926   3
  -9   1  -8 4.46251 3.77001  10
 -10  -1  -8 1.55550 2.54900   3
  10  -1   8 7.41438 3.28600   6
 -10   1  -8 7.98342 3.38943   3
 -12  -2   8 0.28952 1.53454   9
 -12   2   8 -2.3548 1.29796   9
  12   2  -8 5.02210 2.73485   4
  11  -2  -8 6.15260 3.34525   4
 -11  -2   8 6.22760 2.16514   9
  11   2  -8 2.67837 3.43429   4
 -10  -2   8 18.0499 2.76645   9
  10  -2  -8 16.6927 2.97787   6
  10  -2  -8 14.5510 4.36019   4
  10   2  -8 20.6198 5.21169   4
   9  -2  -8 1.73470 2.66480   6
  -9  -2   8 2.97169 2.14588   9
   9  -2  -8 5.38095 3.95907   4
   9   2  -8 0.28796 4.13136   4
   8  -2  -8 -1.8782 3.30082   7
   8  -2  -8 0.40966 2.40444   6
  -8  -2   8 1.68992 1.93829   9
   8  -2  -8 -4.3824 3.01526   4
   8   2  -8 3.41818 4.14188   4
  -7  -2   8 45.9622 3.93828   9
   7  -2  -8 48.3685 4.87610   6
   7  -2  -8 46.7135 5.17409   7
   7  -2  -8 48.3123 6.26721   4
  -7   2   8 43.7392 5.20652   8
   6  -2  -8 146.448 9.82264   7
  -6  -2   8 140.085 8.71016   5
   6  -2  -8 147.820 12.1835   4
  -6  -2   8 153.678 8.29859   9
   6  -2  -8 146.681 9.06278   6
  -6   2   8 151.850 9.95994   8
   5  -2  -8 10.9527 3.56621   4
  -5  -2   8 10.4219 1.62657   9
  -5  -2   8 10.7261 1.59350   5
   5  -2  -8 3.91323 2.34365   7
   5  -2  -8 8.21602 2.21797   6
   5   2  -8 7.86491 1.94182   8
  -5   2   8 8.70666 2.67213   8
   4  -2  -8 34.1134 4.47914   4
  -4  -2   8 33.8070 2.11777   5
  -4  -2   8 33.2656 2.86753   9
   4  -2  -8 27.2923 3.96330   7
   4   2  -8 28.8731 3.54572   8
  -4   2   8 32.9137 4.07894   8
   3  -2  -8 1533.42 78.0095   4
   3  -2  -8 1515.35 78.6394   8
   3  -2  -8 1546.12 78.0441   7
  -3   2   8 1653.88 77.5853   8
   3   2  -8 1477.33 76.9149   8
  -3   2   8 1695.67 76.9736   5
   2  -2  -8 1964.43 103.939   7
   2  -2  -8 2018.12 103.881   4
   2  -2  -8 2018.39 103.302   8
  -2   2   8 2321.62 103.018   5
  -2   2   8 2238.00 103.513   8
   2   2  -8 2124.98 103.195   8
   1  -2  -8 407.727 22.4370   7
  -1  -2   8 404.879 20.9226   2
   1  -2  -8 409.429 21.6078   8
  -1   2   8 425.357 21.4220   5
   1   2  -8 406.267 21.6352   8
  -1   2   8 427.026 21.6609   8
   0  -2  -8 23.8555 3.72708   7
   0  -2   8 19.0829 2.42000   2
   0  -2  -8 17.9383 2.39673  10
   0  -2  -8 22.6190 2.85490   8
   0  -2  -8 20.1174 2.60956   5
   0   2  -8 21.1940 1.75869   5
   0   2   8 18.1227 2.83959   5
  -1  -2  -8 167.145 9.58922   6
  -1  -2  -8 163.742 9.69013  10
   1  -2   8 163.302 9.16081   2
  -1  -2  -8 154.190 9.58831   8
   1  -2   8 166.206 8.98268   9
  -1  -2  -8 174.911 9.85530   5
  -1   2  -8 166.635 9.26645   5
   1   2   8 178.628 10.3971   5
   2  -2   8 130.190 7.47373   2
  -2  -2  -8 129.854 7.92975   8
  -2  -2  -8 130.560 8.30207  10
   2   2   8 135.819 9.04732   5
  -2   2  -8 124.536 8.00320   5
  -3  -2  -8 228.129 13.2700  10
   3  -2   8 215.041 11.9134   2
  -3  -2  -8 218.849 12.5037   8
   3   2   8 217.251 13.8276   5
  -3   2  -8 237.753 13.4518  10
   4  -2   8 276.146 14.6785   2
  -4  -2  -8 284.779 15.5940   3
  -4  -2  -8 301.973 16.6071  10
  -4  -2  -8 264.691 15.1341   8
  -4   2  -8 284.710 16.3720  10
   4   2   8 254.259 16.8759   5
  -4   2  -8 294.918 16.1286   8
  -5  -2  -8 133.081 8.26112   8
  -5  -2  -8 163.977 10.8060  10
   5  -2   8 131.049 7.95937   2
  -5  -2  -8 148.372 9.52819   3
   5   2   8 123.120 10.4501   5
  -5   2  -8 147.349 10.2362  10
  -6  -2  -8 95.5879 7.72023   3
  -6  -2  -8 109.403 9.17394  10
  -6   2  -8 82.8061 8.33212  10
  -6   2  -8 92.7251 8.31499   3
  -7  -2  -8 42.3497 5.89140   3
  -7  -2  -8 57.6712 7.17849  10
  -7   2  -8 39.0437 6.15338   3
  -7   2  -8 42.3202 6.30294  10
  -8  -2  -8 8.96677 3.66639   3
  -8  -2  -8 10.8555 4.14952  10
   8  -2   8 7.95531 3.90557   6
  -8   2  -8 7.48462 4.15372  10
  -8   2  -8 7.82055 4.00049   3
  -9  -2  -8 5.85044 3.70817   3
   9  -2   8 7.48986 4.78752   6
  -9   2  -8 7.20024 4.58391   3
  -9   2  -8 2.35018 3.29685  10
  10  -2   8 20.0397 3.80018   6
 -10   2  -8 19.7769 4.15384   3
  12   3  -8 -4.0376 2.49631   4
 -11  -3   8 6.87167 2.06372   9
  11   3  -8 0.79095 3.53488   4
  10  -3  -8 -1.7471 2.35607   6
 -10  -3   8 5.98220 2.43135   9
  10   3  -8 0.01414 3.81824   4
  -9  -3   8 72.4038 5.47854   9
   9  -3  -8 69.6743 6.25446   6
   9  -3  -8 64.8988 7.20097   4
   9   3  -8 65.6399 8.53210   4
  -8  -3   8 7.70355 2.41895   9
   8  -3  -8 7.84075 2.92116   6
   8  -3  -8 10.8529 4.07222   4
   7  -3  -8 28.5177 4.15069   6
  -7  -3   8 24.2307 2.98674   9
   7  -3  -8 43.5149 6.31924   4
  -6  -3   8 75.2735 5.21015   9
   6  -3  -8 66.7656 6.63888   7
   6  -3  -8 85.2912 7.64026   4
   6  -3  -8 78.1598 6.26251   6
  -6   3   8 76.6613 6.65723   8
   5  -3  -8 54.7211 4.82101   6
   5  -3  -8 60.7918 6.40135   4
  -5  -3   8 54.8901 3.66925   2
   5  -3  -8 50.2267 5.40841   7
  -5  -3   8 49.3801 3.07847   5
  -5  -3   8 50.6830 3.83000   9
  -5   3   8 49.8933 5.36885   8
   5   3  -8 53.8428 5.84830   8
   4  -3  -8 2.98101 2.86893   4
  -4  -3   8 0.00039 1.19411   2
   4  -3  -8 3.35181 1.88500   6
  -4  -3   8 0.50582 1.28896   9
  -4   3   8 1.28132 1.94440   8
   4   3  -8 4.44256 1.49888   8
  -3  -3   8 22.7570 2.41018   9
  -3  -3   8 23.5541 2.51676   2
   3  -3  -8 18.1203 3.55958   7
   3  -3  -8 27.4007 3.31640   6
  -3   3   8 20.9640 3.26237   5
  -3   3   8 17.5204 3.23617   8
   3   3  -8 24.2701 2.76439   8
  -2  -3   8 19.5274 2.18467   9
   2  -3  -8 18.2005 2.71945   8
   2  -3  -8 18.8769 2.87787   6
   2  -3  -8 25.2361 3.89035   7
   2   3  -8 18.3907 2.59921   8
  -2   3   8 24.7740 3.40557   8
  -2   3   8 20.0540 2.90772   5
  -1  -3   8 91.9684 5.39109   9
   1  -3  -8 92.1807 6.38116   8
   1  -3  -8 90.7890 6.36957   6
  -1  -3   8 89.7670 5.85019   2
  -1   3   8 104.156 6.70296   8
  -1   3   8 103.129 6.71253   5
   0  -3   8 1117.00 58.3235   9
   0  -3   8 1198.27 58.5606   2
   0  -3  -8 1133.61 58.4220  10
   0  -3  -8 1164.46 58.9813   8
   0  -3  -8 1209.89 59.1365   6
   0   3   8 1278.49 59.5031   5
   0   3  -8 1259.48 57.8539   5
   1  -3   8 9.70719 1.47332   9
   1  -3   8 8.05897 1.90947   2
  -1  -3  -8 10.4219 1.90676   8
  -1  -3  -8 7.43414 2.21046   6
  -1  -3  -8 9.10187 1.84090  10
  -1   3  -8 8.10380 1.56556   5
   1   3   8 7.04341 2.45649   5
  -2  -3  -8 -1.7909 1.52223  10
  -2  -3  -8 3.16642 1.38155   8
   2  -3   8 -0.3882 1.72218   6
   2  -3   8 2.85272 1.30961   9
   2  -3   8 2.46533 1.54778   2
  -2   3  -8 1.60361 1.52394   5
   2   3   8 2.61762 2.28149   5
   3  -3   8 56.7958 5.37088   6
   3  -3   8 56.6005 4.47686   2
  -3  -3  -8 61.5949 5.45507  10
  -3  -3  -8 56.5053 4.21568   8
  -3   3  -8 50.9053 5.48797  10
   3   3   8 55.0515 6.08319   5
  -4  -3  -8 8.68024 3.17441  10
  -4  -3  -8 6.89613 1.42757   8
   4  -3   8 2.79602 1.74597   2
  -4  -3  -8 0.84419 2.04604   3
  -4   3  -8 5.43394 2.89312  10
  -4   3  -8 4.56109 2.52787   8
   4   3   8 4.62649 2.90167   5
  -5  -3  -8 390.603 21.0224  10
  -5  -3  -8 366.449 19.7965   3
   5  -3   8 362.099 20.6277   6
   5  -3   8 341.055 18.8071   2
  -5   3  -8 358.693 20.5499  10
   6  -3   8 115.816 9.21499   6
  -6  -3  -8 129.248 9.70979  10
   6  -3   8 105.505 6.67879   2
  -6  -3  -8 99.8589 8.18621   3
  -6   3  -8 120.026 9.33043  10
  -7  -3  -8 115.554 8.66835   3
   7  -3   8 118.763 9.98043   6
  -7  -3  -8 126.097 10.1035  10
  -7   3  -8 126.699 9.80963  10
  -7   3  -8 116.273 9.92790   3
   8  -3   8 41.6745 6.24519   6
  -8  -3  -8 64.7205 5.98087   3
  -8   3  -8 66.4098 7.06106   3
  -8   3  -8 60.5922 7.01321  10
   9  -3   8 3.07448 3.22282   6
  -9  -3  -8 1.31382 1.86670   9
  -9   3  -8 3.73117 2.61367  10
  -9   3  -8 7.04415 3.61018   3
  10  -3   8 0.32341 2.69799   6
 -10  -3  -8 -1.2271 1.41714   9
 -10   3  -8 -0.6838 2.61372   3
 -12  -4   8 9.12375 1.72908   9
  12   4  -8 4.92801 2.45676   4
  11  -4  -8 18.7096 4.15900   6
 -11  -4   8 15.6053 2.46240   9
  11   4  -8 15.2912 3.95677   4
  10  -4  -8 2.21496 2.47101   6
 -10  -4   8 2.41593 2.27791   9
  10   4  -8 10.7416 4.49990   4
  -9  -4   8 19.9850 3.15546   9
   9  -4  -8 28.7351 4.25036   6
   8  -4  -8 155.355 10.7717   6
  -8  -4   8 158.589 9.38843   9
  -7  -4   8 504.852 25.2677   9
   7  -4  -8 484.815 26.4248   6
   6  -4  -8 155.100 10.0687   6
  -6  -4   8 149.870 8.84560   9
  -6   4   8 147.321 12.7843   8
  -5  -4   8 100.606 6.15690   9
  -5  -4   8 87.7896 5.80935   2
   5  -4  -8 95.0261 7.06801   7
  -5   4   8 99.7941 7.64490   8
  -4  -4   8 4.08856 1.68933   2
   4  -4  -8 6.08819 2.54381   6
   4  -4  -8 7.14466 2.45093   7
  -4  -4   8 4.80799 1.67774   9
  -4   4   8 7.21526 2.65587   8
   4   4  -8 2.23692 1.38118   8
  -4   4   8 6.43857 2.34987   5
   3  -4  -8 99.5534 6.99518   6
  -3  -4   8 100.612 5.99459   9
  -3  -4   8 97.7618 6.21353   2
   3  -4  -8 91.8738 7.36651   7
  -3   4   8 105.640 7.21600   5
  -3   4   8 93.9959 7.21243   8
   2  -4  -8 16.1962 2.94966   6
  -2  -4   8 20.0489 2.17593   9
  -2  -4   8 19.8342 2.71730   2
   2   4  -8 14.9327 2.33167   8
  -2   4   8 18.0450 2.99619   5
  -2   4   8 13.9912 2.88121   8
  -1  -4   8 713.497 35.6187   9
   1  -4  -8 729.716 36.8665   6
  -1  -4   8 719.941 36.1616   2
  -1   4   8 733.763 36.6922   8
   0  -4   8 1205.98 58.6031   2
   0  -4  -8 1227.57 59.3333   6
   0  -4   8 1203.44 58.0467   9
   0  -4  -8 1088.91 58.7378   8
   0   4  -8 1243.25 57.6256   5
   0   4   8 1236.88 59.6198   5
   0   4  -8 1132.23 57.7426   5
   1  -4   8 217.233 11.1924   9
  -1  -4  -8 222.191 12.5116   6
  -1  -4  -8 203.669 11.6029   8
  -1  -4  -8 205.888 11.4986  10
   1  -4   8 221.027 11.8603   2
   1   4   8 221.161 12.9804   5
  -1   4  -8 198.562 11.5224   5
  -2  -4  -8 123.433 7.91655   6
  -2  -4  -8 117.079 6.82737   8
   2  -4   8 127.560 7.49719   2
   2  -4   8 107.956 7.66942   6
   2  -4   8 123.181 6.75117   9
   2   4   8 102.092 8.39542   5
  -2   4  -8 102.823 7.49022   5
   3  -4   8 497.630 24.7679   2
  -3  -4  -8 465.491 24.3251   8
  -3  -4  -8 465.380 23.7814   9
  -3  -4  -8 474.568 25.3622  10
   3   4   8 459.069 26.4390   5
  -3   4  -8 498.408 25.9211   8
  -3   4  -8 498.383 25.8017  10
   4  -4   8 461.479 23.7631   2
  -4  -4  -8 490.499 25.0442  10
   4  -4   8 471.562 25.0949   6
   4   4   8 395.332 25.5334   5
  -4   4  -8 460.087 25.4641  10
  -4   4  -8 473.691 25.2445   8
   5  -4   8 273.598 15.0628   2
   5  -4   8 283.166 16.8727   6
  -5  -4  -8 298.087 16.8600  10
  -5  -4  -8 260.502 14.4900   9
  -5   4  -8 282.815 16.6744  10
   6  -4   8 27.0331 5.03903   6
  -6  -4  -8 23.8355 2.97349   9
   6  -4   8 28.8144 3.20607   2
  -6  -4  -8 25.3115 3.71401   3
  -6   4  -8 28.7291 4.76895  10
   7  -4   8 62.3233 7.65827   6
  -7  -4  -8 64.8295 5.00643   9
  -7   4  -8 62.3624 7.27122  10
  -7   4  -8 73.2551 7.75069   3
  -8  -4  -8 5.43994 2.03289   9
   8  -4   8 8.48561 4.06067   6
  -8   4  -8 11.1314 3.78200   3
  -8   4  -8 9.81418 3.14287  10
   9  -4   8 5.17180 3.40091   6
  -9  -4  -8 2.13704 1.57178   9
  -9   4  -8 1.84522 2.23765  10
  -9   4  -8 1.48647 2.90179   3
  10  -4   8 1.07016 3.01068   6
 -10  -4  -8 0.84974 1.27657   9
 -10   4  -8 1.34953 2.94627   3
  11  -5  -8 1.11882 2.06334   6
 -11  -5   8 1.79218 1.51949   9
  11   5  -8 5.49329 2.95957   4
  10  -5  -8 6.57005 2.62898   6
 -10  -5   8 2.13332 2.03317   9
  10   5  -8 2.94681 3.71158   4
  -9  -5   8 2.45390 2.21289   9
   9  -5  -8 1.99093 2.80028   6
  -8  -5   8 2.91808 2.36773   9
   8  -5  -8 -3.1678 2.64977   6
  -7  -5   8 147.602 8.99323   9
  -6  -5   8 247.265 13.7917   9
   6  -5  -8 266.347 15.5021   6
  -5  -5   8 18.5766 2.65312   9
  -5  -5   8 11.7848 2.02561   2
   5  -5  -8 10.6888 3.49781   6
  -5   5   8 9.76818 3.90342   8
  -5   5   8 14.3430 4.56627   5
  -4  -5   8 210.725 11.7765   2
  -4  -5   8 222.803 11.6937   9
   4  -5  -8 218.040 13.2172   6
  -4   5   8 201.879 13.0976   8
  -3  -5   8 151.940 8.32021   9
   3  -5  -8 148.220 9.71490   6
  -3  -5   8 142.153 8.62089   2
  -3   5   8 148.223 9.63761   8
  -3   5   8 160.188 9.92917   5
   3   5  -8 120.053 8.38981   8
   2  -5  -8 380.284 20.9173   6
  -2  -5   8 370.317 18.7335   9
  -2  -5   8 373.548 19.2961   2
  -2   5   8 359.854 20.1799   5
  -2   5   8 349.099 19.8593   8
   1  -5  -8 133.505 8.96265   6
  -1  -5   8 128.745 7.79854   6
  -1   5   8 127.776 8.89081   5
  -1   5   8 125.874 8.23095   8
   0  -5   8 45.5321 4.07906   6
   0  -5  -8 34.9055 3.77010   8
   0  -5  -8 45.4143 5.41569   6
   0  -5   8 38.9609 4.23921   2
   0  -5   8 43.7230 3.55384   9
   0   5   8 41.5841 4.95475   5
   0   5  -8 42.3876 2.88603   5
   0   5  -8 41.4828 2.74023   5
   1  -5   8 21.7292 2.58512   9
   1  -5   8 21.5576 3.31793   6
  -1  -5  -8 23.0489 2.64869   8
  -1  -5  -8 29.3058 4.17853   6
   1  -5   8 24.6552 3.39575   2
  -1   5  -8 22.0889 3.45845   8
  -1   5  -8 20.6804 2.97880   5
  -1   5  -8 21.7763 2.30153   5
   1   5   8 25.2165 4.15839   5
  -2  -5  -8 133.264 7.59318   9
   2  -5   8 147.827 8.98801   2
  -2  -5  -8 141.661 9.52857   6
   2  -5   8 148.566 8.21618   9
  -2   5  -8 135.742 9.46239   8
   2   5   8 156.408 11.0284   5
   3  -5   8 280.696 15.2632   2
   3  -5   8 283.826 16.2111   6
  -3  -5  -8 275.179 14.0696   9
   3   5   8 256.458 16.7852   5
  -3   5  -8 287.386 17.7150  10
  -3   5  -8 271.226 16.2202   8
  -4  -5  -8 105.500 6.43325   9
   4  -5   8 109.432 7.51819   2
   4  -5   8 121.966 9.04896   6
  -4   5  -8 111.256 8.38539  10
   5  -5   8 0.60182 2.20770   2
  -5  -5  -8 4.05737 1.66296   9
  -5   5  -8 -2.3861 2.42417  10
  -6  -5  -8 9.36389 2.01835   9
   6  -5   8 9.96511 2.44213   2
   6  -5   8 13.6419 4.11818   6
  -6   5  -8 13.8736 3.85879  10
  -6   5  -8 14.1432 4.37504   3
   7  -5   8 20.4666 4.62039   6
  -7  -5  -8 22.2098 2.66641   9
  -7   5  -8 17.5791 4.35072   3
  -7   5  -8 19.2567 3.86804  10
  -8  -5  -8 2.75716 1.62805   9
   8  -5   8 -0.7799 3.25379   6
  -8   5  -8 0.29830 2.85805  10
  -8   5  -8 1.58165 2.97090   3
   9  -5   8 3.38079 3.00553   6
  -9  -5  -8 -0.1022 1.64598   9
  -9   5  -8 0.69418 2.39439   3
 -10  -6   8 3.40184 1.98797   9
  10  -6  -8 4.96579 2.26296   6
  10   6  -8 1.99631 2.99881   4
   9  -6  -8 48.9983 5.55181   6
  -9  -6   8 49.4736 4.64914   9
  -8  -6   8 70.0121 5.54841   9
   8  -6  -8 61.4021 6.55713   6
   7  -6  -8 8.93679 3.34363   6
  -7  -6   8 6.10511 2.32304   9
   6  -6  -8 3.24436 2.95037   6
  -6  -6   8 3.93967 2.22015   9
  -5  -6   8 83.6833 5.88643   9
   5  -6  -8 82.5529 7.65117   6
  -5  -6   8 68.1091 5.23402   2
  -4  -6   8 372.253 19.2063   9
  -4  -6   8 352.461 19.3593   2
   4  -6  -8 386.330 21.0144   6
   3  -6  -8 85.2400 7.48397   6
  -3  -6   8 88.7032 5.88548   9
  -3  -6   8 91.8700 6.42846   2
  -3   6   8 85.3711 9.04290   8
  -2  -6   8 58.7477 4.53124   9
   2  -6  -8 59.3414 6.02063   6
  -2  -6   8 61.4013 5.16114   2
  -2   6   8 50.8051 5.17423   8
  -2   6   8 55.0923 5.94005   5
   2   6  -8 53.5118 4.24700   8
  -1  -6   8 319.337 17.0354   2
  -1  -6   8 323.809 16.2891   9
  -1  -6   8 304.493 16.6933   6
   1  -6  -8 328.235 18.0571   6
  -1   6   8 295.109 16.9568   8
  -1   6   8 306.803 18.0304   5
   1   6  -8 303.196 16.8012   8
   0  -6   8 461.929 24.2753   6
   0  -6   8 487.606 24.3877   2
   0  -6   8 471.886 23.5163   9
   0  -6  -8 476.256 25.1802   6
   0   6   8 435.050 25.2750   5
   0   6  -8 448.666 24.4923   8
   1  -6   8 215.755 13.3126   6
  -1  -6  -8 243.082 14.0504   6
   1  -6   8 230.788 12.2698   9
   1  -6   8 226.262 13.1556   2
   1   6   8 220.053 14.8642   5
   2  -6   8 23.7738 2.99572   9
   2  -6   8 21.0695 3.51759   2
   2  -6   8 26.8847 4.12728   6
  -2  -6  -8 18.0891 3.86225   6
   3  -6   8 30.3524 4.29870   2
   3  -6   8 33.3080 5.06475   6
  -3  -6  -8 30.7583 2.80283   9
  -3   6  -8 32.2794 4.50654  10
   4  -6   8 60.5847 7.57998   2
  -4  -6  -8 45.5883 3.46039   9
  -4   6  -8 37.5282 5.17782  10
   5  -6   8 95.5295 8.14376   6
  -5  -6  -8 78.8221 5.22770   9
   5  -6   8 81.6011 6.46580   2
  -5   6  -8 81.4810 7.10707  10
   6  -6   8 109.251 7.20655   2
  -6  -6  -8 103.652 6.36296   9
   6  -6   8 94.5694 8.98536   6
  -6   6  -8 114.401 7.85703  10
  -6   6  -8 109.551 8.87524   3
  -7  -6  -8 2.73102 1.55015   9
   7  -6   8 6.97024 5.39198   6
  -7   6  -8 11.1635 3.69956  10
  -8  -6  -8 10.8796 1.78438   9
   8  -6   8 13.7138 3.45938   6
  -8   6  -8 11.6211 3.08622   3
   9  -6   8 21.0250 4.20983   6
  -9  -6  -8 26.8328 2.92159   9
  -9   6  -8 36.3776 3.95919   3
  10  -7  -8 11.5860 2.37767   6
 -10  -7   8 5.37511 2.12737   9
  10   7  -8 6.27670 3.46958   4
  -9  -7   8 17.8163 2.66640   9
   9  -7  -8 21.7870 3.47349   6
   8  -7  -8 8.89016 3.10720   6
  -8  -7   8 1.88286 2.63689   9
   7  -7  -8 0.36384 2.98419   6
  -7  -7   8 0.76375 2.09968   9
  -6  -7   8 20.2615 3.33431   9
   6  -7  -8 22.3329 4.41559   6
   5  -7  -8 20.7740 4.63590   6
  -5  -7   8 22.3599 3.16589   9
  -4  -7   8 37.8562 4.39884   2
  -4  -7   8 44.9884 4.41691   9
   4  -7  -8 41.4368 5.78330   6
  -3  -7   8 2.19549 2.22820   2
  -3  -7   8 1.46728 2.05082   9
   3  -7  -8 2.58612 3.10979   6
  -2  -7   8 10.8187 3.25859   2
   2  -7  -8 13.0934 3.95624   6
  -2  -7   8 11.2148 2.46906   9
  -2   7   8 8.27070 2.68302   8
  -1  -7   8 56.3158 5.62500   2
   1  -7  -8 54.6460 6.47559   6
  -1  -7   8 54.5987 4.66047   9
  -1  -7   8 48.5662 4.88388   6
   0  -7   8 40.4485 4.74376   2
   0  -7  -8 34.0245 5.03929   6
   0  -7   8 34.3609 3.79840   9
   0  -7   8 35.0350 4.27351   6
   0   7  -8 31.9416 4.30539   8
   1  -7   8 233.206 12.5648   9
  -1  -7  -8 225.532 14.3410   6
   1  -7   8 210.431 13.4380   6
   1  -7   8 242.572 13.6833   2
   2  -7   8 43.7797 5.15171   2
  -2  -7  -8 45.0502 5.61122   6
   2  -7   8 30.2732 3.58217   9
   2  -7   8 47.1901 5.48693   6
  -2   7  -8 36.3582 4.53005  10
   3  -7   8 4.51021 2.92469   2
   3  -7   8 3.08160 3.12370   6
  -3   7  -8 4.74763 2.38520  10
   4  -7   8 11.6442 3.02088   2
   4  -7   8 3.37948 3.35882   6
  -4  -7  -8 10.0419 1.66942   9
  -4   7  -8 4.58963 2.44189  10
   5  -7   8 36.4128 5.41121   6
   5  -7   8 35.6343 4.24521   2
  -5  -7  -8 25.5283 2.86299   9
  -5   7  -8 37.7078 5.05766   3
  -6  -7  -8 13.5150 1.79953   9
   6  -7   8 14.5163 2.90939   2
   6  -7   8 23.1337 6.23698   6
  -6   7  -8 22.1153 5.12984   3
   7  -7   8 11.0434 3.28764   6
  -7  -7  -8 10.2875 1.97499   9
  -7   7  -8 11.6453 2.96871   3
   8  -7   8 -1.7673 2.22140   6
  -8   7  -8 -0.2587 1.93079   3
   9  -8  -8 0.83581 1.64900   6
  -9  -8   8 2.81634 1.76154   9
  -8  -8   8 1.02386 1.80527   9
   8  -8  -8 4.62145 2.74393   6
   7  -8  -8 15.6772 3.62914   6
  -7  -8   8 13.9514 2.62502   9
  -6  -8   8 6.00250 2.64499   9
   6  -8  -8 6.23994 3.35993   6
   5  -8  -8 5.46955 3.78436   6
  -5  -8   8 8.48451 2.43249   9
  -4  -8   8 32.0120 4.00838   2
  -4  -8   8 30.5074 3.61141   9
   4  -8  -8 40.5179 5.82334   6
   3  -8  -8 335.410 18.7230   6
  -3  -8   8 277.473 17.0127   2
  -3  -8   8 325.718 16.6774   9
  -2  -8   8 50.9916 4.91642   9
  -2  -8   8 47.3790 5.57663   2
   2  -8  -8 53.0909 6.66531   6
  -1  -8   8 358.149 20.3015   6
   1  -8  -8 396.753 21.9177   6
  -1  -8   8 401.226 19.9243   9
  -1  -8   8 369.962 20.7174   2
   0  -8   8 77.5528 6.90390   6
   0  -8  -8 87.4612 7.99086   6
   0  -8   8 84.6125 6.08702   9
   0  -8   8 85.4485 7.23683   2
  -1  -8  -8 4.83628 3.36251   6
   1  -8   8 4.28908 2.75707   6
   1  -8   8 8.49944 3.07773   2
   1  -8   8 8.91298 2.55029   9
  -1   8  -8 4.72031 2.26309  10
   2  -8   8 4.76711 2.24324   9
   2  -8   8 3.34524 2.83339   6
  -2  -8  -8 1.41228 3.03282   6
   2  -8   8 3.69090 2.87801   2
   3  -8   8 151.975 10.6341   6
   3  -8   8 149.431 10.0580   2
   4  -8   8 77.3824 6.82603   2
   4  -8   8 100.908 8.21026   6
  -4   8  -8 86.7127 6.99708   3
   5  -8   8 9.00974 2.64620   2
   5  -8   8 6.90961 3.38216   6
  -5   8  -8 16.7639 3.12306   3
   6  -8   8 38.4886 3.96474   2
   6  -8   8 48.0508 5.54526   6
  -6   8  -8 36.8286 4.45489   3
   7  -8   8 21.6476 5.66010   6
  -7   8  -8 26.8254 3.58255   3
  -8  -9   8 0.69502 1.62616   9
   8  -9  -8 -3.0123 1.59046   6
   8   9  -8 2.44246 2.03628   4
  -7  -9   8 0.72680 1.68815   9
   7  -9  -8 -2.7046 1.86316   6
  -6  -9   8 5.48806 2.00075   9
   6  -9  -8 5.17380 3.00358   6
   5  -9  -8 2.06855 2.91417   6
  -5  -9   8 0.34820 1.98360   9
   4  -9  -8 -1.0465 2.80643   6
  -4  -9   8 4.50198 2.84204   2
  -4  -9   8 0.85570 2.00172   9
  -3  -9   8 4.81466 2.68679   2
   3  -9  -8 6.05196 3.59591   6
  -3  -9   8 1.41926 2.19078   9
  -2  -9   8 11.0274 2.55330   9
  -2  -9   8 6.81625 2.81244   2
   2  -9  -8 9.80776 4.01713   6
  -1  -9   8 -1.7509 2.11735   9
   1  -9  -8 1.73859 3.09826   6
  -1  -9   8 0.09669 2.45897   2
   0  -9   8 15.8429 2.84066   9
   0  -9   8 18.4770 3.64358   2
   0  -9  -8 16.3187 4.22985   6
   0  -9   8 11.3600 2.73564   6
   1  -9   8 41.6650 4.23370   9
  -1  -9  -8 46.9892 5.93617   6
   1  -9   8 32.8360 4.24358   6
   1  -9   8 39.3636 4.88698   2
   2  -9   8 1.78967 3.34565   6
   2  -9   8 5.69058 2.87700   2
   3  -9   8 1.55368 2.40612   2
   3  -9   8 0.62005 2.54802   6
   4  -9   8 27.0578 3.51802   2
   4  -9   8 37.7559 4.61943   6
   5  -9   8 13.1085 2.57197   2
   5  -9   8 11.6906 2.76639   6
   6  -9   8 -0.3347 1.82692   6
   6 -10  -8 4.03731 3.50604   6
  -6 -10   8 6.11910 1.83721   9
   6  10  -8 13.2977 2.55786   4
  -5 -10   8 27.1183 2.86910   9
   5 -10  -8 30.8844 4.25727   6
   5  10  -8 30.6806 4.72185   4
   4 -10  -8 0.63357 2.84020   6
  -4 -10   8 1.60265 1.71752   9
   3 -10  -8 14.0030 3.70407   6
  -3 -10   8 15.2369 2.70990   2
  -3 -10   8 12.8056 2.40795   9
   2 -10  -8 38.6290 5.19023   6
  -2 -10   8 39.2199 4.03618   9
  -2 -10   8 43.5979 4.69764   2
   1 -10  -8 86.2852 7.59706   6
  -1 -10   8 84.4692 5.80730   9
  -1 -10   8 79.5688 6.63358   2
   0 -10  -8 20.2505 3.94290   6
   0 -10   8 14.3811 3.42224   2
   0 -10   8 17.0176 2.41349   9
   1 -10   8 13.8107 3.24641   2
   1 -10   8 17.7886 2.35731   9
   1 -10   8 18.3638 2.91085   6
  -1 -10  -8 13.8501 3.21341   6
   2 -10   8 32.5083 3.97158   6
   2 -10   8 22.2193 3.38164   2
   3 -10   8 46.8911 4.58410   6
   3 -10   8 50.3569 4.73631   2
   4 -10   8 8.67257 2.73958   2
   4 -10   8 10.0516 2.25260   6
  -3 -11   8 8.16972 2.40133   9
   3 -11  -8 -0.4404 3.62703   6
  -2 -11   8 3.92144 1.57574   2
   2 -11  -8 6.42563 2.52249   6
  -2 -11   8 7.18217 1.56756   9
  -1 -11   8 2.19659 1.45514   9
  -1 -11   8 1.45045 2.18405   2
   1 -11  -8 4.29045 2.21552   6
   0 -11   8 28.6059 3.39717   2
   0 -11  -8 29.0585 3.85678   6
   1 -11   8 2.25708 2.36707   2
 -12   0   9 -0.9237 1.94261   9
  12   0  -9 2.41487 2.80583   4
  11   0  -9 -2.2147 2.72606   4
 -11   0   9 -0.8966 1.67525   9
  10   0  -9 3.98281 3.03094   7
 -10   0   9 1.07971 1.60065   9
  10   0  -9 -2.0762 3.72582   4
   9   0  -9 -0.0235 3.98781   4
  -8   0   9 1.03958 3.38765   8
   8   0  -9 2.08661 3.92942   4
  -7   0   9 3.89296 2.33601   8
   7   0  -9 2.26269 3.61190   4
   6   0  -9 -0.2045 2.99159   4
  -6   0   9 1.35113 2.21457   8
   5   0  -9 3.33925 2.77764   4
  -5   0   9 -0.1097 0.86514   9
  -5   0   9 -3.0577 1.58687   5
  -5   0   9 -1.8921 1.93469   8
  -4   0   9 1.02088 2.04769   8
  -4   0   9 -0.2169 1.28573   5
   4   0  -9 0.62819 2.49177   4
   3   0  -9 -3.1575 1.33684   8
  -3   0   9 -0.5696 0.88460   5
   3   0  -9 2.81822 2.46075   4
  -3   0   9 -2.5285 1.73904   8
   2   0  -9 -1.9003 1.92167   7
   2   0  -9 -1.3064 1.55913   8
  -2   0   9 0.19781 0.96763   5
   1   0  -9 -2.3158 1.83464   7
  -1   0   9 0.68285 1.10938   5
   0   0  -9 1.23441 0.99988   5
   0   0   9 1.96208 1.51182   5
   0   0  -9 1.35532 1.49891   8
  -1   0  -9 0.42889 1.12582   5
   1   0   9 -0.3316 1.61489   5
  -1   0  -9 2.86421 1.62298   8
  -1   0  -9 2.47273 2.11798   7
   2   0   9 -0.4497 2.01274   5
  -2   0  -9 -0.6192 1.18972   5
  -2   0  -9 1.52374 2.03856  10
  -2   0  -9 2.59912 1.86826   7
   3   0   9 -1.5790 1.97504   5
  -3   0  -9 0.24915 2.27692  10
  -4   0  -9 -1.6401 2.35955  10
   4   0   9 -1.6006 1.06215   2
   4   0   9 0.45636 2.35796   5
  -5   0  -9 2.06824 3.04472  10
  -5   0  -9 -2.8426 1.88162   8
  -6   0  -9 2.38038 3.21829   3
  -6   0  -9 -1.9127 3.10151  10
  -7   0  -9 3.80116 4.00652  10
  -7   0  -9 1.74061 3.43129   3
  -8   0  -9 2.28890 3.81677  10
  -8   0  -9 -5.0778 2.95876   3
  -9   0  -9 1.69278 3.37909   3
  -9   0  -9 0.93171 2.90646  10
 -10   0  -9 -1.2298 2.35900   3
  10   0   9 -3.1739 2.40459   6
 -12  -1   9 3.69057 1.63764   9
  12  -1  -9 6.99939 2.86138   4
  12   1  -9 1.74294 2.61250   4
 -12   1   9 1.10484 1.32153   9
  11  -1  -9 2.43471 3.22582   4
 -11  -1   9 1.57199 1.79344   9
  11   1  -9 2.86931 3.25900   7
 -11   1   9 2.16564 1.61443   9
  11   1  -9 4.99705 3.51363   4
  10  -1  -9 21.6526 5.32084   4
 -10  -1   9 19.0012 2.81280   9
  10   1  -9 21.6518 5.49641   4
   9  -1  -9 64.7194 7.68385   4
  -9  -1   9 56.3651 4.58431   9
   9  -1  -9 51.2199 6.21207   7
   9   1  -9 62.4746 7.83692   4
   8  -1  -9 128.817 9.18696   7
   8  -1  -9 108.738 10.1018   4
  -8  -1   9 122.610 7.15842   9
  -8  -1   9 108.638 8.78079   8
   8   1  -9 135.442 10.4293   4
  -7  -1   9 24.4089 3.56292   8
  -7  -1   9 31.8292 2.98450   9
   7  -1  -9 34.3973 5.63187   4
   7   1  -9 27.0751 5.15058   4
  -7   1   9 23.6453 4.84549   8
  -6  -1   9 45.2003 4.69418   8
   6  -1  -9 43.9442 5.90942   4
  -6  -1   9 42.1840 4.60256   5
  -6  -1   9 40.9660 3.33004   9
   6   1  -9 47.8234 6.28912   4
  -6   1   9 50.7737 5.13798   8
  -5  -1   9 770.254 38.1746   8
   5  -1  -9 750.712 39.1052   4
  -5  -1   9 728.670 36.7609   9
  -5  -1   9 716.664 37.4960   5
   5   1  -9 783.062 39.0981   4
  -5   1   9 755.895 38.4671   8
  -4  -1   9 1330.96 67.5763   5
   4  -1  -9 1381.42 69.4427   4
   4  -1  -9 1386.65 69.4587   7
  -4   1   9 1458.77 69.0020   8
   4   1  -9 1407.85 69.2917   4
   4   1  -9 1365.09 69.3176   8
   3  -1  -9 244.955 14.8474   7
   3  -1  -9 243.859 14.8828   4
  -3  -1   9 236.822 12.6075   5
  -3  -1   9 254.004 12.4794   5
   3   1  -9 251.414 14.0904   8
  -3   1   9 264.866 14.4367   8
  -3   1   9 272.983 13.4904   5
   3   1  -9 259.353 14.5990   4
   2  -1  -9 792.687 41.7822   8
   2  -1  -9 812.598 42.5247   7
   2  -1  -9 809.951 42.2568   4
  -2   1   9 887.154 42.0041   8
   2   1  -9 821.515 41.8099   8
  -2   1   9 861.199 41.1151   5
   1  -1  -9 868.276 43.4458   8
  -1  -1   9 783.080 41.2739   5
   1  -1  -9 840.182 43.3343   7
  -1   1   9 885.314 42.1007   5
   1   1  -9 868.042 42.7186   8
   0  -1  -9 63.2038 4.27226   5
   0  -1  -9 51.2940 5.40266   7
   0  -1   9 51.5653 4.11542   5
   0   1   9 55.6967 4.71496   5
   0   1  -9 61.1954 4.78164   8
   0   1  -9 58.7846 3.65530   5
  -1  -1  -9 575.901 29.5856   5
  -1  -1  -9 564.502 30.2504   7
  -1  -1  -9 557.844 29.5679   8
   1  -1   9 531.221 29.4313   5
  -1  -1  -9 592.837 29.6293  10
  -1   1  -9 617.636 29.0773   5
   1   1   9 599.203 29.9066   5
  -2  -1  -9 231.667 12.8976  10
   2  -1   9 204.149 12.8319   5
  -2  -1  -9 219.824 12.4989   8
   2   1   9 217.330 13.1609   5
  -2   1  -9 205.670 13.5619   5
  -2   1  -9 235.419 13.0227  10
   3  -1   9 193.525 10.7414   2
  -3  -1  -9 200.277 12.2731  10
  -3   1  -9 209.227 12.4192  10
   3   1   9 195.287 12.8422   5
  -4  -1  -9 67.2084 6.36209  10
   4  -1   9 57.4059 4.29834   2
  -4   1  -9 66.9759 6.48191  10
   4   1   9 72.3428 6.76303   5
  -5  -1  -9 71.5437 5.61204   8
  -5  -1  -9 77.0111 7.33528  10
  -5  -1  -9 77.4440 6.62790   3
   5  -1   9 60.3088 4.60298   2
   5   1   9 67.2107 7.64977   5
  -5   1  -9 70.6242 6.11451   8
  -5   1  -9 80.6401 7.54187  10
  -6  -1  -9 363.655 21.2125  10
  -6  -1  -9 358.250 20.3799   3
  -6  -1  -9 343.215 21.1434   8
  -6   1  -9 364.933 21.1184  10
  -6   1  -9 364.895 20.6611   3
  -7  -1  -9 73.8310 7.29321   3
  -7  -1  -9 70.1037 8.29975  10
  -7   1  -9 81.3690 8.28253  10
  -7   1  -9 81.8303 8.04245   3
  -8  -1  -9 73.9781 8.18152  10
  -8  -1  -9 76.3588 7.29802   3
  -8   1  -9 67.1080 7.52186   3
  -8   1  -9 62.6712 7.85131  10
  -9  -1  -9 67.4037 6.74792   3
   9  -1   9 54.3046 6.92375   6
  -9   1  -9 58.2680 6.77905  10
  -9   1  -9 68.0727 7.42224   3
  10  -1   9 30.0779 4.34472   6
 -10  -1  -9 30.3966 4.15220   3
 -10   1  -9 38.9771 5.15012   3
 -12  -2   9 -0.7133 1.47271   9
  12   2  -9 4.44778 2.90329   4
 -11  -2   9 -1.1777 1.69366   9
  11  -2  -9 -3.0460 2.91760   4
  11   2  -9 4.63080 3.79101   4
 -11   2   9 -1.9815 1.37785   9
  10  -2  -9 6.60110 3.58094   4
 -10  -2   9 8.56145 2.26494   9
  10   2  -9 13.5107 4.64471   4
   9  -2  -9 -2.5158 3.01219   6
  -9  -2   9 -1.4522 1.74856   9
   9  -2  -9 -4.1927 3.32713   4
   9   2  -9 4.95814 4.34396   4
   8  -2  -9 13.0286 2.95119   6
   8  -2  -9 19.0319 4.91967   4
   8  -2  -9 15.1135 3.64400   7
  -8  -2   9 13.4075 2.36970   9
   8   2  -9 19.2525 5.48802   4
   7  -2  -9 32.8941 4.19517   6
   7  -2  -9 35.0547 5.88124   4
  -7  -2   9 38.6717 3.46701   9
  -7   2   9 29.6517 4.33181   8
   7   2  -9 39.2084 6.26506   4
   6  -2  -9 26.1050 3.40468   6
   6  -2  -9 37.5602 5.99468   4
   6  -2  -9 25.4991 4.25679   7
  -6  -2   9 28.2638 2.96108   9
  -6   2   9 22.4300 3.82720   8
  -5  -2   9 45.9831 3.49530   2
   5  -2  -9 54.5606 5.35907   7
   5  -2  -9 57.0411 5.96553   4
  -5  -2   9 44.4832 3.46279   9
  -5  -2   9 45.6258 3.07101   5
   5  -2  -9 48.0242 4.33869   6
  -5   2   9 57.0673 5.43667   8
  -4  -2   9 54.4288 3.71679   9
   4  -2  -9 52.8916 5.45622   7
   4  -2  -9 48.7927 5.55951   4
  -4  -2   9 50.0429 3.55329   2
  -4   2   9 58.5320 7.41777   8
   4   2  -9 43.4988 4.22544   8
   3  -2  -9 10.3462 3.43573   4
  -3  -2   9 9.85839 1.64688   2
  -3  -2   9 4.35869 1.19809   9
   3  -2  -9 8.42650 2.94394   7
  -3   2   9 5.00667 1.77089   5
   3   2  -9 8.39929 1.89765   8
  -3   2   9 6.60471 2.57805   8
  -2  -2   9 14.3373 2.11493   2
   2  -2  -9 13.7899 3.39462   4
   2  -2  -9 14.9981 2.67661   8
   2   2  -9 12.8614 2.45832   8
  -2   2   9 17.6152 3.11876   8
  -2   2   9 13.6751 2.32144   5
   1  -2  -9 204.349 12.3760   8
  -1   2   9 227.830 12.3067   5
   1   2  -9 223.869 12.6295   8
   0  -2  -9 104.382 7.80668   7
   0  -2   9 100.910 6.37674   2
   0  -2  -9 103.883 6.95471   8
   0  -2  -9 99.8888 6.55283  10
   0   2  -9 106.699 5.63352   5
   0   2   9 115.296 7.33867   5
  -1  -2  -9 9.57698 2.02397   8
   1  -2   9 14.5644 2.09265   2
   1  -2   9 13.5064 1.58951   9
  -1  -2  -9 13.5990 2.63278  10
  -1   2  -9 15.0658 2.13990   5
   1   2   9 14.1150 2.94788   5
  -2  -2  -9 443.524 22.4757  10
  -2  -2  -9 424.260 22.0710   8
   2  -2   9 401.482 21.4167   2
  -2   2  -9 415.856 21.9832   5
   2   2   9 422.030 23.0255   5
  -3  -2  -9 255.547 14.8140   8
   3  -2   9 278.438 14.3322   2
  -3  -2  -9 270.681 15.6488  10
  -3   2  -9 282.911 15.8910  10
   3   2   9 264.935 16.2409   5
   4  -2   9 95.7070 6.48933   2
  -4  -2  -9 114.705 8.59786  10
  -4  -2  -9 114.944 7.57488   3
  -4   2  -9 114.424 8.05381   8
   4   2   9 91.6261 8.69055   5
  -4   2  -9 109.581 8.29072  10
  -5  -2  -9 28.4549 5.12112  10
  -5  -2  -9 22.3477 4.01189   3
   5  -2   9 20.9242 2.72408   2
  -5  -2  -9 28.6601 3.25410   8
  -5   2  -9 27.9056 4.88281  10
  -5   2  -9 22.6806 3.98305   8
  -6  -2  -9 138.453 10.7566  10
  -6  -2  -9 122.983 9.29362   3
  -6   2  -9 133.767 10.1375   3
  -6   2  -9 129.841 10.2508  10
  -7  -2  -9 -2.3819 2.58993   3
  -7  -2  -9 -3.0941 3.44376  10
  -7   2  -9 3.49383 3.59912   3
  -7   2  -9 -2.0916 3.15736  10
   8  -2   9 23.1222 5.03807   6
  -8  -2  -9 27.3540 4.40320   3
  -8  -2  -9 21.5161 4.85505  10
  -8   2  -9 30.3597 5.06929  10
  -8   2  -9 26.6029 5.08982   3
   9  -2   9 0.97650 3.26970   6
  -9  -2  -9 3.34556 2.83900   3
  -9   2  -9 8.39179 3.84751   3
  -9   2  -9 2.24032 2.82494  10
  10  -2   9 7.71143 2.83873   6
 -10  -2  -9 9.11798 1.83116   9
 -10   2  -9 14.6893 3.46509   3
 -12  -3   9 4.90199 1.68249   9
 -11  -3   9 11.3654 2.27055   9
  11   3  -9 16.4534 4.28133   4
  10  -3  -9 3.79717 2.60014   6
 -10  -3   9 3.12915 2.25599   9
  10   3  -9 1.05304 3.99530   4
   9  -3  -9 8.35822 3.71493   4
  -9  -3   9 4.50555 2.36242   9
   9  -3  -9 -0.3810 2.31721   6
   9   3  -9 2.05842 4.40293   4
   8  -3  -9 3.47551 2.40855   6
   8  -3  -9 1.99343 3.86718   4
   7  -3  -9 194.629 13.1695   7
  -7  -3   9 230.463 11.9919   9
   7  -3  -9 231.101 14.7219   4
   7  -3  -9 220.371 12.8596   6
   6  -3  -9 88.2288 8.13344   4
   6  -3  -9 90.2804 6.34385   6
   6  -3  -9 70.0359 6.71109   7
  -6  -3   9 83.9780 5.47706   9
  -6   3   9 71.8459 6.86479   8
   5  -3  -9 42.7028 4.81258   7
   5  -3  -9 28.9602 3.83804   6
  -5  -3   9 24.9892 2.90041   2
  -5  -3   9 34.2199 3.12181   9
   5  -3  -9 35.0007 6.16391   4
  -5   3   9 25.2060 4.04250   8
   4  -3  -9 67.6943 6.83047   4
  -4  -3   9 65.1286 4.24872   9
   4  -3  -9 54.3873 6.05075   7
   4  -3  -9 51.1193 4.99525   6
  -4  -3   9 62.2467 4.46207   2
  -4   3   9 67.2808 5.90731   8
  -4   3   9 70.6085 5.45659   5
   4   3  -9 69.1483 4.83031   8
   3  -3  -9 483.538 24.7362   6
  -3  -3   9 457.086 23.7282   9
   3  -3  -9 461.878 25.8169   7
  -3  -3   9 472.201 24.1229   2
   3   3  -9 461.553 24.6959   8
  -3   3   9 509.012 24.9578   5
  -3   3   9 498.089 27.5652   8
   2  -3  -9 1452.68 71.9186   6
  -2  -3   9 1441.56 71.3736   2
  -2  -3   9 1395.59 70.8721   9
   2  -3  -9 1434.69 73.0883   7
  -2   3   9 1527.73 72.4279   8
  -2   3   9 1574.34 72.1647   5
   2   3  -9 1407.18 72.0878   8
   1  -3  -9 1002.21 50.2394   6
  -1  -3   9 996.746 49.7352   2
   1  -3  -9 1033.57 51.5254   7
  -1  -3   9 961.967 49.1966   9
   1  -3  -9 967.694 50.5804   8
  -1   3   9 1055.46 50.5311   5
  -1   3   9 1054.53 50.4974   8
   0  -3   9 1157.74 56.7204   2
   0  -3   9 1121.92 56.1416   9
   0  -3  -9 1177.51 57.2645   6
   0  -3  -9 1087.26 56.6389  10
   0  -3  -9 1115.87 57.2702   8
   0   3   9 1198.81 57.6766   5
   0   3  -9 1219.11 55.6687   5
   1  -3   9 283.090 13.9953   9
   1  -3   9 270.493 14.5463   2
  -1  -3  -9 269.695 14.7996  10
  -1  -3  -9 278.884 15.0392   6
  -1  -3  -9 266.778 14.8709   8
   1  -3   9 266.297 15.2104   6
   1   3   9 268.589 16.3566   5
  -1   3  -9 273.176 14.2760   5
  -2  -3  -9 184.730 11.2310  10
   2  -3   9 197.947 10.7218   2
   2  -3   9 187.574 11.1592   6
   2  -3   9 193.311 10.1255   9
  -2  -3  -9 184.271 10.8498   8
   2   3   9 190.677 12.1386   5
   3  -3   9 1322.23 63.6374   2
   3  -3   9 1300.01 64.5804   6
  -3  -3  -9 1217.62 63.7480   8
  -3  -3  -9 1278.23 63.8137   3
  -3  -3  -9 1372.61 64.8509  10
  -3   3  -9 1365.59 65.0583  10
   3   3   9 1213.07 65.4147   5
   4  -3   9 380.576 21.0255   6
  -4  -3  -9 372.272 20.1410   3
  -4  -3  -9 411.201 21.4744  10
   4  -3   9 366.605 19.6858   2
  -4   3  -9 374.308 21.1039   8
   4   3   9 350.816 21.8921   5
  -4   3  -9 390.743 21.3820  10
  -5  -3  -9 66.8181 5.77724   3
   5  -3   9 62.6795 6.71172   6
  -5  -3  -9 71.8965 7.20233  10
   5  -3   9 53.7204 4.80160   2
  -5   3  -9 66.5107 7.00511  10
  -6  -3  -9 149.564 10.9844  10
   6  -3   9 129.166 8.15779   2
   6  -3   9 141.598 10.9800   6
  -6  -3  -9 141.449 9.57917   3
  -6   3  -9 146.110 10.8173  10
   7  -3   9 3.60418 3.56723   6
  -7  -3  -9 3.67947 2.46899   3
  -7  -3  -9 -3.1154 6.33194  10
  -7   3  -9 6.44338 3.80384   3
  -8  -3  -9 5.50221 2.76769   3
   8  -3   9 1.85292 3.22594   6
  -8   3  -9 4.76508 3.59348   3
  -8   3  -9 5.86323 3.39295  10
   9  -3   9 0.01856 2.94352   6
  -9  -3  -9 -1.2280 1.48595   9
  -9   3  -9 3.67646 3.14618   3
  -9   3  -9 4.39114 2.45590  10
  10  -3   9 1.18408 2.74034   6
 -10  -3  -9 -0.5300 1.23933   9
 -10   3  -9 0.51143 2.24693   3
 -11  -4   9 0.82495 1.80425   9
  11   4  -9 -1.2625 2.79079   4
 -10  -4   9 67.2951 7.26726   9
  10  -4  -9 81.8073 6.18824   6
  10   4  -9 79.6982 10.0356   4
  -9  -4   9 2.69511 2.32050   9
   9   4  -9 -0.1889 4.16963   4
  -8  -4   9 160.659 9.28815   9
   8  -4  -9 153.416 10.5829   6
  -7  -4   9 23.8013 3.05746   9
   7  -4  -9 21.8155 3.89808   6
   6  -4  -9 146.589 9.86515   6
   6  -4  -9 135.184 9.70935   7
  -6  -4   9 161.498 8.70752   9
   5  -4  -9 23.5175 4.48653   6
   5  -4  -9 15.5449 3.11686   7
  -5  -4   9 26.8016 2.81273   9
  -5  -4   9 17.6894 2.26215   2
  -5   4   9 13.7925 2.76945   5
   4  -4  -9 84.4794 7.15445   7
  -4  -4   9 89.4153 6.49295   9
   4  -4  -9 93.3498 6.87720   6
  -4  -4   9 77.6973 5.73186   2
   4   4  -9 85.5983 5.91642   8
  -4   4   9 103.089 7.16636   5
  -4   4   9 94.0833 7.24448   8
  -3  -4   9 222.298 11.5179   9
  -3  -4   9 219.663 11.8918   2
   3  -4  -9 213.131 12.6675   6
   3  -4  -9 207.881 13.3341   7
  -3   4   9 216.610 13.0248   8
  -3   4   9 216.439 12.8185   5
  -2  -4   9 61.8806 4.28999   9
  -2  -4   9 66.6043 4.89922   2
   2  -4  -9 68.3349 5.58165   6
  -2   4   9 65.4417 5.58014   5
  -2   4   9 57.1218 7.89190   8
  -1  -4   9 307.859 15.9392   9
   1  -4  -9 316.583 17.2354   6
  -1  -4   9 315.854 16.5652   2
  -1   4   9 309.047 17.0470   8
  -1   4   9 311.814 17.3794   5
   0  -4   9 11.4906 2.42217   2
   0  -4  -9 9.43727 2.60725   6
   0  -4   9 10.4024 1.73756   9
   0   4   9 10.2095 2.75194   5
   1  -4   9 40.5096 4.06397   2
   1  -4   9 41.7653 3.36042   9
  -1  -4  -9 47.9400 4.73812   6
  -1  -4  -9 29.6429 3.53503  10
   1  -4   9 35.2548 3.99761   6
  -1  -4  -9 45.5402 3.88284   8
  -1   4  -9 39.1301 3.18661   5
   1   4   9 43.9321 5.16807   5
   2  -4   9 245.375 13.1199   2
  -2  -4  -9 226.631 12.8564   8
   2  -4   9 242.756 12.4634   9
   2  -4   9 243.233 13.6116   6
  -2  -4  -9 236.083 13.3677  10
  -2   4  -9 221.946 13.0816   5
   2   4   9 232.858 14.5750   5
  -3  -4  -9 215.869 11.8953   9
   3  -4   9 241.416 13.1038   2
   3  -4   9 234.566 13.8761   6
  -3  -4  -9 235.203 13.7204  10
  -3   4  -9 235.048 14.1445  10
   3   4   9 231.846 15.5701   5
  -3   4  -9 241.922 16.9748   8
   4  -4   9 273.401 14.7433   2
   4  -4   9 275.488 15.9969   6
  -4  -4  -9 266.318 16.8159  10
  -4  -4  -9 254.500 13.7884   9
  -4   4  -9 275.908 16.1607  10
   5  -4   9 400.230 22.5088   6
  -5  -4  -9 382.100 20.0678   9
  -5  -4  -9 401.622 22.3924  10
   5  -4   9 381.128 20.6447   2
  -5   4  -9 419.512 22.4531  10
  -6  -4  -9 39.4992 3.68991   9
   6  -4   9 44.4618 6.34785   6
   6  -4   9 35.7105 4.57398   2
  -6   4  -9 49.8212 6.13992  10
   7  -4   9 9.38186 4.20006   6
  -7  -4  -9 4.82442 1.85204   9
  -7   4  -9 12.2419 4.43386   3
  -7   4  -9 7.33288 3.54155  10
  -8  -4  -9 0.35653 1.57745   9
  -8   4  -9 1.18922 2.64649  10
  -8   4  -9 -1.4119 3.84013   3
  -9  -4  -9 0.94076 1.50167   9
   9  -4   9 4.60506 3.17997   6
  -9   4  -9 5.68272 2.33172  10
  -9   4  -9 -4.0832 2.40750   3
 -11  -5   9 3.55677 1.74025   9
  11   5  -9 -0.7104 2.51457   4
  10  -5  -9 59.8124 5.09874   6
 -10  -5   9 56.4103 4.81242   9
  10   5  -9 62.1837 7.26942   4
   9  -5  -9 126.566 9.26487   6
  -9  -5   9 137.066 8.31682   9
   9   5  -9 144.841 11.4160   4
   8  -5  -9 200.216 13.1194   6
  -8  -5   9 229.549 12.1262   9
  -7  -5   9 46.0897 4.48555   9
   7  -5  -9 47.3035 5.60886   6
  -6  -5   9 1.67808 2.08367   9
   6  -5  -9 4.40538 2.91318   6
  -5  -5   9 32.2413 3.41191   2
   5  -5  -9 36.6392 4.89227   6
  -5  -5   9 36.0779 3.83881   9
   4  -5  -9 178.291 10.8587   6
  -4  -5   9 163.098 9.37538   9
  -4  -5   9 165.817 9.69134   2
  -4   5   9 178.348 11.0944   5
  -4   5   9 146.749 11.0740   8
  -3  -5   9 530.821 26.8935   2
   3  -5  -9 534.476 27.9016   6
  -3  -5   9 518.716 26.3935   9
  -3   5   9 515.933 27.9517   8
  -3   5   9 528.057 27.9843   5
  -2  -5   9 546.388 27.7568   2
   2  -5  -9 546.966 28.6072   6
  -2  -5   9 559.495 27.1386   9
  -2   5   9 512.391 28.3198   8
  -2   5   9 538.524 28.6722   5
  -1  -5   9 194.704 10.5061   9
   1  -5  -9 201.352 12.0688   6
  -1  -5   9 194.239 11.2802   2
  -1   5   9 181.793 11.3181   8
  -1   5   9 194.488 12.1164   5
   0  -5   9 142.533 7.94400   9
   0  -5  -9 144.690 9.45888   6
   0  -5   9 131.511 8.39841   6
   0  -5   9 141.399 8.70837   2
   0   5   9 132.396 9.59388   5
   1  -5   9 114.774 7.56365   2
  -1  -5  -9 114.379 8.15802   6
   1  -5   9 103.992 7.34089   6
   1  -5   9 105.915 6.61498   9
  -1   5  -9 114.733 6.34208   5
  -1   5  -9 106.013 7.77729   8
   1   5   9 101.581 8.28089   5
  -2  -5  -9 15.2977 3.51046   6
   2  -5   9 22.1057 3.40674   2
   2  -5   9 15.7731 2.37085   9
   2  -5   9 19.7683 3.35236   6
  -2   5  -9 10.7579 3.12245   8
   2   5   9 11.2708 3.26787   5
  -3  -5  -9 -0.1243 1.37335   9
   3  -5   9 3.88611 2.71771   6
   3  -5   9 2.45601 2.45550   2
  -3   5  -9 9.32398 3.24417  10
  -4  -5  -9 275.366 14.8043   9
   4  -5   9 295.224 15.9412   2
   4  -5   9 296.425 17.1889   6
  -4   5  -9 294.534 17.0032  10
   5  -5   9 437.739 23.0301   2
   5  -5   9 423.628 23.6992   6
  -5  -5  -9 401.680 21.3604   9
  -5   5  -9 438.619 23.6193  10
   6  -5   9 162.508 11.3646   6
  -6  -5  -9 149.466 8.67230   9
   6  -5   9 147.526 9.09319   2
  -6   5  -9 169.199 11.3283   3
  -6   5  -9 152.362 11.0588  10
   7  -5   9 0.07146 2.96245   6
  -7  -5  -9 3.73814 1.62014   9
  -7   5  -9 -2.1238 2.97136   3
  -7   5  -9 3.90150 2.51057  10
   8  -5   9 18.4766 4.28591   6
  -8  -5  -9 13.8184 2.00570   9
  -8   5  -9 9.93480 3.68135   3
   9  -5   9 68.3830 6.21555   6
  -9  -5  -9 63.7947 4.11478   9
  -9   5  -9 70.1496 6.00309   3
  10  -6  -9 12.6840 2.67828   6
 -10  -6   9 7.48926 1.87812   9
  10   6  -9 3.16805 3.43500   4
  -9  -6   9 2.86009 2.12268   9
   9  -6  -9 0.27614 2.30313   6
   9   6  -9 -0.2069 3.37587   4
   8  -6  -9 14.2956 3.65438   6
  -8  -6   9 6.05797 2.25801   9
  -7  -6   9 7.82835 2.54142   9
   7  -6  -9 10.0948 3.87667   6
  -6  -6   9 54.7054 5.09405   9
   6  -6  -9 60.3001 6.40243   6
  -5  -6   9 3.60144 2.27569   9
  -5  -6   9 3.66289 1.91544   2
   5  -6  -9 1.67616 2.84683   6
  -4  -6   9 227.224 12.3920   9
  -4  -6   9 220.126 12.6072   2
   4  -6  -9 225.968 14.0185   6
  -3  -6   9 31.3060 3.68065   2
   3  -6  -9 23.0635 4.30685   6
  -3  -6   9 23.3047 2.86485   9
  -3   6   9 16.9543 3.28511   8
   2  -6  -9 14.2573 3.72892   6
  -2  -6   9 14.0836 3.01898   2
  -2  -6   9 15.1415 2.50286   9
  -2   6   9 14.1525 3.10678   8
   2   6  -9 16.3986 2.46961   8
  -1  -6   9 2.23772 1.94380   9
   1  -6  -9 1.47893 2.72387   6
  -1  -6   9 0.15547 2.87739   6
  -1  -6   9 0.32419 2.26293   2
   1   6  -9 3.30233 1.74458   8
  -1   6   9 2.99323 1.82552   8
  -1   6   9 -2.6336 2.69758   5
   0  -6  -9 43.4360 5.40982   6
   0  -6   9 40.3990 4.11594   6
   0  -6   9 43.4032 3.82325   9
   0  -6   9 37.7101 4.48391   2
   0   6  -9 30.6033 4.13489   8
   1  -6   9 147.518 8.54379   9
   1  -6   9 146.336 9.45604   6
   1  -6   9 144.241 9.43589   2
  -1  -6  -9 141.961 10.1585   6
   2  -6   9 58.0227 5.84615   6
  -2  -6  -9 59.1182 6.15271   6
   2  -6   9 63.2215 5.89363   2
   2  -6   9 63.0411 4.80693   9
  -2   6  -9 58.2975 5.96865  10
   3  -6   9 0.81488 2.50220   6
   3  -6   9 2.24634 2.53524   2
  -3   6  -9 4.16826 2.78915  10
   4  -6   9 0.48923 2.87110   6
   4  -6   9 -0.3423 2.40465   2
  -4  -6  -9 -1.5575 1.28900   9
  -4   6  -9 1.22363 2.70101  10
  -5  -6  -9 -0.2341 1.25843   9
   5  -6   9 3.84705 2.38149   2
   5  -6   9 -2.5527 2.96425   6
   6  -6   9 28.3359 5.02178   6
  -6  -6  -9 24.1316 2.55184   9
   6  -6   9 21.7684 2.95628   2
  -6   6  -9 17.1709 4.06753   3
  -6   6  -9 20.9453 3.43087  10
   7  -6   9 4.98478 3.16091   6
  -7  -6  -9 2.65810 1.35789   9
  -7   6  -9 1.15705 2.79168   3
  -7   6  -9 1.84944 2.53736  10
  -8  -6  -9 -0.0847 1.83049   9
   8  -6   9 -0.5445 2.28809   6
  -8   6  -9 3.85144 2.38250   3
  10  -7  -9 0.40825 1.78554   6
 -10  -7   9 -0.9049 1.44464   9
  10   7  -9 0.92122 2.66002   4
  -9  -7   9 5.31780 2.02487   9
   9  -7  -9 6.12522 2.38462   6
   9   7  -9 2.81904 3.42148   4
   8  -7  -9 -0.6555 2.59518   6
  -8  -7   9 1.29135 2.14803   9
  -7  -7   9 3.05680 2.24434   9
   7  -7  -9 -0.6778 2.64018   6
   6  -7  -9 130.036 9.75801   6
  -6  -7   9 130.219 8.18293   9
  -5  -7   9 131.856 8.63374   2
  -5  -7   9 155.193 9.01981   9
   5  -7  -9 155.859 10.8314   6
   4  -7  -9 143.349 10.5842   6
  -4  -7   9 137.463 8.62823   9
  -3  -7   9 55.1758 4.60030   9
  -3  -7   9 46.9924 5.28865   2
   2  -7  -9 322.578 17.8964   6
  -2  -7   9 291.147 16.5904   2
  -2  -7   9 280.387 16.0434   9
   1  -7  -9 17.8740 4.31997   6
  -1  -7   9 13.5405 3.30802   2
  -1  -7   9 8.80049 2.31483   9
  -1  -7   9 14.2564 4.55092   6
   0  -7   9 34.4160 4.79327   2
   0  -7   9 38.3178 3.89624   9
   0  -7   9 38.3653 4.24116   6
   0  -7  -9 33.2014 5.06384   6
   1  -7   9 14.2734 2.81710   9
   1  -7   9 15.5154 3.24597   6
   1  -7   9 14.9385 3.49559   2
  -1  -7  -9 21.8943 4.46223   6
   2  -7   9 165.660 9.96558   9
   2  -7   9 189.899 13.5745   6
   2  -7   9 179.288 11.1922   2
  -2  -7  -9 178.335 11.8760   6
  -2   7  -9 168.273 11.1054  10
   3  -7   9 42.3700 4.91354   2
   3  -7   9 44.8994 5.92416   6
  -3   7  -9 36.3585 4.87742  10
   4  -7   9 59.7994 6.78888   6
   4  -7   9 54.9038 5.69855   2
  -4   7  -9 59.5526 5.51925  10
   5  -7   9 9.42871 2.62653   2
   5  -7   9 4.81897 3.15318   6
  -5   7  -9 -2.8793 2.82597  10
  -5   7  -9 3.78299 2.80776   3
   6  -7   9 47.3532 4.76149   2
   6  -7   9 59.6975 6.24940   6
  -6   7  -9 64.2771 6.08283   3
   7  -7   9 86.1779 7.35270   6
  -7   7  -9 93.7926 7.02949   3
   8  -7   9 4.85399 2.42160   6
  -8   7  -9 5.33147 1.97220   3
   9  -8  -9 -1.8969 1.62457   6
  -9  -8   9 4.06835 1.71104   9
   9   8  -9 6.94762 2.75462   4
   8  -8  -9 0.60251 1.88385   6
  -8  -8   9 -0.7687 1.62804   9
   7  -8  -9 7.14889 2.99861   6
  -7  -8   9 2.11041 2.15292   9
   6  -8  -9 1.24821 2.81105   6
  -6  -8   9 3.34753 2.30514   9
  -5  -8   9 18.8032 2.60917   2
  -5  -8   9 24.0637 3.09994   9
   5  -8  -9 21.8309 4.45500   6
  -4  -8   9 4.44712 2.44051   9
   4  -8  -9 4.21601 3.46149   6
  -4  -8   9 1.55049 2.19004   2
  -3  -8   9 5.32384 2.47106   2
  -3  -8   9 7.51416 2.60313   9
   3  -8  -9 4.46717 3.55854   6
  -2  -8   9 42.8945 5.40199   2
   2  -8  -9 54.4723 6.59974   6
  -2  -8   9 45.4335 4.71465   9
  -1  -8   9 8.61428 2.59385   9
  -1  -8   9 8.34956 3.20657   2
   1  -8  -9 4.93118 3.49198   6
   0  -8   9 26.3455 3.71520   6
   0  -8   9 20.3541 3.73505   2
   0  -8   9 24.2184 3.21410   9
   0  -8  -9 26.6672 4.88486   6
  -1  -8  -9 13.9611 3.87167   6
   1  -8   9 11.5354 3.02746   6
   1  -8   9 18.1660 2.84544   9
   1  -8   9 13.3944 3.49320   2
  -1   8  -9 10.9370 2.81514  10
   2  -8   9 11.3306 2.61097   9
   2  -8   9 5.11059 2.80186   6
   2  -8   9 4.86322 3.13183   2
  -2   8  -9 2.91474 3.02153  10
   3  -8   9 3.03706 2.89680   2
   3  -8   9 -5.5194 2.48067   6
   4  -8   9 4.23351 5.30649   6
   4  -8   9 3.49685 2.55319   2
   5  -8   9 0.35772 2.08211   2
   5  -8   9 -4.1950 2.34803   6
  -5   8  -9 -0.3162 2.15382   3
   6  -8   9 55.4202 5.91373   6
   6  -8   9 66.2772 5.48426   2
  -6   8  -9 68.2052 6.95523   3
   7  -8   9 4.51704 2.18885   6
  -7   8  -9 3.65817 2.56936   3
   7  -9  -9 5.90939 2.28102   6
  -7  -9   9 -0.4721 1.59276   9
   7   9  -9 -1.2117 2.65836   4
  -6  -9   9 7.27947 2.03815   9
   6  -9  -9 15.1325 3.44637   6
  -5  -9   9 22.5617 2.90389   9
   5  -9  -9 35.4123 4.74164   6
  -4  -9   9 3.58925 2.05384   2
  -4  -9   9 5.99061 3.04231   9
   4  -9  -9 6.27102 4.79478   6
  -3  -9   9 66.6385 5.96817   2
   3  -9  -9 76.6542 7.48710   6
  -3  -9   9 74.8426 5.59919   9
  -2  -9   9 365.075 20.4182   2
   2  -9  -9 391.783 21.6366   6
  -2  -9   9 380.209 19.6774   9
  -1  -9   9 249.364 14.6069   2
   1  -9  -9 239.037 15.2703   6
  -1  -9   9 259.406 13.6647   9
   0  -9  -9 149.477 10.5551   6
   0  -9   9 146.510 8.80876   9
   0  -9   9 147.321 9.79814   2
   1  -9   9 42.4038 4.32485   9
   1  -9   9 47.2660 5.38716   2
  -1  -9  -9 43.2627 5.50200   6
   2  -9   9 45.5272 4.98777   6
   2  -9   9 41.3631 5.58153   2
   3  -9   9 67.0992 6.10704   2
   3  -9   9 77.6801 6.25448   6
   4  -9   9 44.0149 4.59505   2
   4  -9   9 36.6505 4.68160   6
   5  -9   9 32.9147 4.10071   6
   5  -9   9 22.1509 3.36258   2
  -6 -10   9 -2.9906 1.29972   9
   6 -10  -9 0.65055 1.76840   6
  -5 -10   9 -0.9478 1.53881   9
   5 -10  -9 3.31988 2.57277   6
  -4 -10   9 -5.0649 2.04935   2
  -4 -10   9 -0.2725 1.44404   9
   4 -10  -9 2.39698 2.60531   6
   3 -10  -9 -0.5702 2.25372   6
  -3 -10   9 -0.6712 1.72854   9
  -3 -10   9 -0.0676 1.73726   2
   2 -10  -9 7.89437 3.03471   6
  -2 -10   9 -0.5622 1.99620   2
  -2 -10   9 1.92875 1.95325   9
   1 -10  -9 -1.1140 2.21678   6
  -1 -10   9 0.79944 1.71189   9
  -1 -10   9 2.42376 2.27135   2
   0 -10   9 2.08519 2.49916   2
   0 -10   9 0.38449 1.78544   9
   0 -10  -9 -0.1003 2.33086   6
   1 -10   9 3.67884 2.45761   2
   2 -10   9 1.03728 2.32146   2
   3 -10   9 -0.3985 1.81542   2
   3 -10   9 0.73461 2.42508   6
   4 -10   9 -1.0420 2.40353   6
   4 -10   9 -1.3911 1.59408   2
   3 -11  -9 4.31661 1.81568   6
  -2 -11   9 1.28870 1.41739   9
   2 -11  -9 3.37383 2.13133   6
  -2 -11   9 0.09709 1.44272   2
  -1 -11   9 4.41528 1.93789   2
   1 -11  -9 -0.3693 2.28899   6
   0 -11   9 8.77664 2.33813   2
 -12   0  10 20.2114 2.23755   9
  11   0 -10 5.81829 3.85645   4
 -11   0  10 8.88746 2.00262   9
 -10   0  10 9.22570 2.06925   9
  10   0 -10 8.34157 3.47598   7
  10   0 -10 11.2796 4.28889   4
  -9   0  10 105.914 6.44938   9
   9   0 -10 105.413 10.0090   4
   8   0 -10 38.5559 6.50448   4
  -8   0  10 37.1693 3.26343   9
  -7   0  10 103.269 7.73753   8
   7   0 -10 100.013 9.12216   4
   6   0 -10 324.285 19.3323   4
  -6   0  10 342.936 18.5588   8
  -6   0  10 321.980 16.5693   9
   5   0 -10 317.915 17.6093   4
  -5   0  10 301.155 16.7021   8
  -5   0  10 267.662 16.0956   5
  -4   0  10 72.5638 5.87185   8
  -4   0  10 55.0414 4.64003   5
   4   0 -10 64.8988 6.03972   4
   3   0 -10 365.925 20.9149   4
  -3   0  10 396.440 19.2947   5
   2   0 -10 116.167 8.16585   4
   2   0 -10 110.807 8.58439   8
   2   0 -10 126.257 8.57754   7
  -2   0  10 117.009 6.69622   5
   1   0 -10 865.784 45.5615   7
   1   0 -10 887.897 44.6922   8
  -1   0  10 903.319 43.7392   5
   0   0 -10 25.8089 3.84369   8
   0   0  10 27.0499 3.20496   5
   0   0 -10 22.1796 3.87182   7
   0   0 -10 25.9050 2.57245   5
   1   0  10 122.108 8.15626   5
  -1   0 -10 123.935 7.45697   5
  -2   0 -10 2291.66 106.306  10
   2   0  10 2033.72 106.209   5
  -3   0 -10 331.457 17.7349  10
   3   0  10 284.484 17.7832   5
  -4   0 -10 1155.23 55.3247  10
   4   0  10 1085.52 53.1467   2
   4   0  10 1014.38 55.6027   5
  -5   0 -10 123.903 9.92722  10
  -5   0 -10 131.400 10.3722   8
  -6   0 -10 94.5586 8.87780  10
  -6   0 -10 100.056 8.45122   3
  -7   0 -10 655.551 35.5645  10
  -7   0 -10 652.076 34.7017   3
  -8   0 -10 136.417 10.2083   3
  -8   0 -10 127.245 10.5743  10
  -9   0 -10 11.1479 3.58564  10
  -9   0 -10 16.4204 3.98940   3
 -10   0 -10 -0.7717 2.22275   3
  10   0  10 -1.7744 2.67652   6
 -12  -1  10 1.26287 1.27680   9
  12  -1 -10 -3.2706 2.42253   4
  12   1 -10 1.83898 2.98944   4
  11  -1 -10 -3.9266 2.92385   4
 -11  -1  10 6.37408 1.73234   9
 -11   1  10 1.74408 1.52813   9
  11   1 -10 -1.5896 2.83676   7
  11   1 -10 -3.3562 3.40182   4
  10  -1 -10 6.27582 3.95380   4
 -10  -1  10 2.22291 1.76697   9
  10   1 -10 8.31583 4.99849   4
 -10   1  10 3.17933 1.45495   9
   9  -1 -10 9.99068 4.69525   7
  -9  -1  10 -0.2365 1.79886   9
   9  -1 -10 4.14327 4.19463   4
   9   1 -10 -0.5865 4.32430   4
  -9   1  10 3.75687 1.60169   9
   8  -1 -10 13.5418 3.69700   7
   8  -1 -10 9.12784 4.60532   4
  -8  -1  10 9.69264 2.11683   9
   8   1 -10 8.32620 4.47257   4
   7  -1 -10 5.96808 3.02646   7
   7  -1 -10 3.57967 3.79730   4
  -7  -1  10 1.49582 1.37912   9
   7   1 -10 2.49660 3.48543   4
  -7   1  10 3.00830 2.50377   8
  -6  -1  10 26.6371 2.53986   9
   6  -1 -10 20.2867 4.23011   7
   6  -1 -10 25.2809 5.06302   4
  -6  -1  10 19.9816 2.34817   2
  -6  -1  10 19.6082 3.73873   5
   6   1 -10 23.4748 4.78767   4
  -6   1  10 31.9303 4.36252   8
  -5  -1  10 520.477 27.7475   5
   5  -1 -10 565.492 29.7331   7
   5  -1 -10 567.476 29.8969   4
  -5  -1  10 541.970 27.2486   9
  -5   1  10 565.675 29.2261   8
   5   1 -10 561.173 29.7320   4
  -4  -1  10 -0.1725 0.59888   5
   4  -1 -10 3.45939 2.85661   7
  -4  -1  10 0.14252 0.82234   5
   4  -1 -10 4.54064 3.13103   4
   4   1 -10 2.50610 2.76419   4
  -4   1  10 1.48770 1.36168   5
   3  -1 -10 33.3197 4.85131   4
   3  -1 -10 34.0618 4.84102   7
  -3   1  10 34.6055 4.30788   8
   3   1 -10 36.4836 4.83789   4
  -3   1  10 28.9493 3.05321   5
   2  -1 -10 523.725 28.5484   4
   2  -1 -10 508.392 28.0838   7
   2   1 -10 502.914 27.3157   4
  -2   1  10 557.704 26.5642   5
   1  -1 -10 587.884 30.9851   7
  -1  -1  10 540.488 28.7389   5
   1  -1 -10 581.602 30.2835   8
  -1   1  10 631.822 29.6944   5
   1   1 -10 584.178 30.7223   7
   0  -1 -10 221.825 11.3410   5
   0  -1 -10 201.807 12.7096   7
   0  -1 -10 205.372 11.9284   8
   0  -1  10 190.470 11.1210   5
   0   1 -10 191.615 12.3132   7
   0   1  10 210.369 11.7701   5
  -1  -1 -10 169.504 9.33024   5
  -1  -1 -10 146.133 10.1641   7
   1  -1  10 136.043 9.31185   5
  -1  -1 -10 157.216 9.69298  10
  -1   1 -10 152.846 9.91053   7
   1   1  10 161.334 9.95252   5
  -1   1 -10 166.487 8.93480   5
  -2  -1 -10 189.216 11.2442  10
   2  -1  10 171.647 11.1773   5
   2  -1  10 180.697 10.0225   2
  -2   1 -10 179.864 10.5477   5
  -2   1 -10 200.271 11.4752  10
   2   1  10 172.938 11.4568   5
  -2   1 -10 176.051 10.8562   7
  -3  -1 -10 5.03235 2.67791  10
   3  -1  10 11.2385 2.00034   2
  -3   1 -10 5.18459 2.89985  10
   3   1  10 9.58747 2.96917   5
  -4  -1 -10 142.917 9.78602  10
   4  -1  10 128.187 7.56802   2
   4   1  10 120.419 9.96169   5
  -5  -1 -10 58.1778 6.52856  10
   5  -1  10 38.7723 3.58752   2
  -5  -1 -10 37.7031 4.58242   8
  -5  -1 -10 50.4523 5.68287   3
  -5   1 -10 51.3808 6.53956  10
  -5   1 -10 55.0386 5.36246   8
  -6  -1 -10 -1.4570 2.73893   3
  -6  -1 -10 -0.1706 3.53708  10
  -6   1 -10 -2.5173 3.00634  10
  -6   1 -10 -0.8727 3.57247   3
  -7  -1 -10 43.5384 5.92461   3
  -7  -1 -10 37.6198 6.33323  10
  -7   1 -10 35.0724 5.47186   3
  -7   1 -10 36.3669 5.97132  10
  -8  -1 -10 105.706 8.42039   3
  -8  -1 -10 94.2535 8.99047  10
  -8   1 -10 97.4868 8.50710   3
  -8   1 -10 94.5642 9.01980  10
  -9  -1 -10 6.83629 2.90384   3
   9  -1  10 -1.1796 3.24275   6
  -9   1 -10 -0.3839 3.26030  10
  -9   1 -10 0.83001 2.74724   3
  10  -1  10 -2.4689 2.31953   6
 -10  -1 -10 1.44891 2.17523   3
 -10   1 -10 -1.1694 2.40997   3
 -12  -2  10 1.96166 1.28845   9
  12   2 -10 1.41308 2.44379   4
  11  -2 -10 -0.1480 2.82636   4
 -11  -2  10 0.37805 1.61065   9
  11   2 -10 3.01998 3.57445   4
  10  -2 -10 7.30034 3.50912   4
 -10  -2  10 15.2968 2.52205   9
 -10   2  10 11.3093 1.80793   9
  10   2 -10 11.5922 4.62042   4
  -9  -2  10 45.1073 4.09135   9
   9  -2 -10 38.7889 6.24410   4
   9   2 -10 42.9252 6.77253   4
   8  -2 -10 77.9561 7.39625   7
   8  -2 -10 86.5100 8.82563   4
  -8  -2  10 86.6863 5.66249   9
  -7  -2  10 31.0073 3.39004   9
   7  -2 -10 36.8999 6.37825   4
   7  -2 -10 36.1826 5.18683   7
   7  -2 -10 35.1546 3.82099   6
   7   2 -10 35.9287 6.11723   4
   6  -2 -10 23.1182 5.02678   4
   6  -2 -10 20.8824 2.90642   6
   6  -2 -10 9.50853 3.18875   7
  -6   2  10 11.1346 3.18580   8
   6   2 -10 15.0108 4.37767   4
   5  -2 -10 160.427 14.7821   4
  -5  -2  10 157.619 8.36805   9
  -5  -2  10 142.465 8.47682   2
   5  -2 -10 152.530 9.04918   6
   5  -2 -10 154.310 10.5444   7
  -5   2  10 161.086 10.3805   8
  -4  -2  10 372.367 19.5891   2
  -4  -2  10 369.470 19.1847   9
   4  -2 -10 377.874 21.5803   7
   4  -2 -10 396.940 21.8787   4
  -4   2  10 386.466 21.0868   8
  -4   2  10 403.870 20.2556   5
   4   2 -10 381.345 21.3099   4
  -3  -2  10 107.026 6.53951   2
   3  -2 -10 117.339 8.49809   7
  -3  -2  10 103.370 5.92957   9
   3  -2 -10 101.796 8.16124   4
  -3   2  10 118.164 7.96538   8
   3   2 -10 104.000 7.59365   4
  -3   2  10 108.576 6.95179   5
   2  -2 -10 306.684 17.4202   7
   2   2 -10 271.405 16.0769   4
  -2   2  10 300.229 16.4992   8
  -2   2  10 299.046 15.8495   5
   1  -2 -10 1138.93 59.3572   7
  -1  -2  10 1156.82 57.6713   2
  -1   2  10 1227.50 58.2740   5
   0  -2 -10 910.017 45.0281  10
   0  -2  10 909.079 44.6507   2
   0  -2 -10 904.910 46.3403   7
   0  -2  10 860.624 43.9663   9
   0  -2 -10 883.290 44.7966   6
   0  -2 -10 907.859 48.4338   8
   0   2  10 951.331 45.5521   5
   0   2 -10 966.326 43.8629   5
   0   2 -10 829.118 45.5552   7
   1  -2  10 307.522 15.4338   9
   1  -2  10 302.532 16.0374   2
  -1   2 -10 278.630 16.7543   7
  -1   2 -10 308.162 15.8665   5
   1   2  10 330.264 17.4055   5
   2  -2  10 104.098 6.70873   2
  -2  -2 -10 117.091 7.73846  10
  -2   2 -10 105.142 7.69734   7
   2   2  10 112.302 8.33112   5
  -2   2 -10 107.247 6.92055   5
  -3  -2 -10 333.531 18.4005  10
   3  -2  10 317.495 16.9175   2
  -3   2 -10 334.501 18.5383  10
   3   2  10 308.626 18.8269   5
  -4  -2 -10 98.9192 7.67155   3
  -4  -2 -10 90.1473 10.5752  10
  -4   2 -10 96.6914 8.10326  10
  -5  -2 -10 1.46226 2.62216   3
   5  -2  10 3.15630 1.60252   2
  -5  -2 -10 -4.6141 2.32154   8
  -5  -2 -10 4.06170 3.38973  10
  -5   2 -10 5.08021 3.53355  10
  -6  -2 -10 8.08953 3.95976  10
  -6  -2 -10 10.9384 3.35803   3
  -6   2 -10 10.6878 4.04895  10
  -6   2 -10 13.1711 4.12945   3
  -7  -2 -10 2.98184 4.32476  10
  -7  -2 -10 2.04839 2.93576   3
  -7   2 -10 4.69732 3.71693  10
  -7   2 -10 5.74424 3.73467   3
  -8  -2 -10 3.87685 3.50596  10
  -8  -2 -10 1.75705 2.76476   3
   8  -2  10 -0.3668 3.23595   6
  -8   2 -10 3.84194 3.60490   3
  -8   2 -10 1.22491 3.16621  10
  -9  -2 -10 17.1373 3.35675   3
   9  -2  10 28.1642 4.63955   6
  -9   2 -10 19.1715 3.94516  10
  -9   2 -10 23.9494 4.37515   3
 -10  -2 -10 12.2579 1.76905   9
  10  -2  10 15.0383 3.50252   6
 -10   2 -10 15.5184 3.65996   3
 -12  -3  10 6.79059 1.39411   9
  12   3 -10 10.5356 4.98263   4
  12   3 -10 3.16357 2.66502   7
 -11  -3  10 18.4785 2.38909   9
  11   3 -10 21.4439 4.47504   4
 -10  -3  10 18.4116 2.77321   9
  10   3 -10 18.0037 4.99547   4
   9  -3 -10 0.66390 2.32874   6
  -9  -3  10 0.41489 1.72919   9
   9  -3 -10 0.88347 3.24226   4
   9   3 -10 -0.4703 4.02859   4
  -8  -3  10 -0.7732 1.84226   9
   8  -3 -10 0.69400 3.66486   4
   8  -3 -10 -2.9641 2.35400   6
   8   3 -10 0.30938 4.30906   4
   7  -3 -10 21.8343 3.65390   6
  -7  -3  10 20.3997 2.70162   9
   7  -3 -10 26.6948 5.80887   4
   7   3 -10 23.8410 5.50418   4
   6  -3 -10 4.72431 3.32358   7
   6  -3 -10 -1.2914 2.11488   6
  -6  -3  10 6.09506 1.79845   9
   6  -3 -10 4.36958 3.80287   4
  -6   3  10 3.27552 2.39118   8
  -5  -3  10 50.5241 5.18874   9
   5  -3 -10 60.6032 6.91939   4
  -5  -3  10 52.6631 3.93161   2
   5  -3 -10 60.3316 6.10921   7
   5  -3 -10 50.7449 4.70041   6
  -5   3  10 48.3400 5.49982   8
  -5   3  10 56.1186 5.03227   5
   4  -3 -10 6.80819 3.71903   4
  -4  -3  10 2.01494 1.47455   2
  -4  -3  10 2.79001 1.34684   9
   4  -3 -10 1.68285 1.76499   6
   4  -3 -10 6.20477 2.96423   7
  -4   3  10 5.30732 2.55289   8
  -4   3  10 2.86784 1.89132   5
  -3  -3  10 116.949 6.72656   9
   3  -3 -10 125.090 9.13986   7
  -3  -3  10 119.355 7.20153   2
   3  -3 -10 116.750 8.46990   6
  -3   3  10 117.150 8.44265   5
   3   3 -10 125.543 8.38853   4
  -3   3  10 121.129 8.56194   8
  -2  -3  10 51.3879 4.18209   2
  -2  -3  10 51.9686 3.47792   9
   2  -3 -10 52.3299 5.81063   7
  -2   3  10 47.3934 4.62694   5
  -2   3  10 51.6934 5.05312   8
   2   3 -10 56.3578 4.65736   4
  -1  -3  10 80.9424 4.95936   9
  -1  -3  10 86.5493 5.71453   2
   1  -3 -10 89.7386 7.37417   7
   1  -3 -10 82.0373 5.90674   6
   1  -3 -10 83.1236 5.95850  10
  -1   3  10 90.4399 6.54270   5
   0  -3 -10 79.2144 5.76999   6
   0  -3 -10 74.7325 5.30472  10
   0  -3  10 83.5497 5.58535   2
   0  -3  10 79.0671 4.77677   9
   0   3 -10 78.5112 6.11797   7
   0   3  10 81.5026 6.82893   5
   1  -3  10 375.855 19.0224   2
   1  -3  10 364.678 19.0193   6
   1  -3  10 374.378 18.3375   9
  -1  -3 -10 360.085 19.2638  10
  -1   3 -10 365.869 18.4925   5
  -1   3 -10 334.965 19.3553   7
   1   3  10 362.418 20.2068   5
  -2  -3 -10 4.62194 2.10363  10
   2  -3  10 12.2980 2.32499   2
   2  -3  10 11.7963 2.68981   6
   2   3  10 11.3133 2.94031   5
  -3  -3 -10 38.9209 4.44752   3
  -3  -3 -10 43.2524 4.96882  10
   3  -3  10 42.6590 4.08610   2
   3  -3  10 51.0454 7.46705   6
   3   3  10 29.8634 4.89330   5
  -3   3 -10 43.9871 5.40925  10
  -4  -3 -10 201.977 12.2467   3
   4  -3  10 211.120 13.0761   6
   4  -3  10 201.209 11.8134   2
  -4  -3 -10 227.917 13.6597  10
  -4   3 -10 216.893 13.6097  10
   5  -3  10 131.367 8.60363   2
  -5  -3 -10 145.206 9.31943   3
  -5  -3 -10 156.793 11.0328  10
   5  -3  10 149.297 10.5233   6
  -5   3 -10 149.792 10.8574  10
  -6  -3 -10 -0.6266 3.09959  10
  -6  -3 -10 0.07541 2.73439   3
   6  -3  10 0.31200 3.27544   6
   6  -3  10 -3.0579 1.68347   2
  -6   3 -10 -2.5876 2.85764  10
   7  -3  10 0.39671 3.30542   6
  -7  -3 -10 0.79186 2.47962   3
  -7  -3 -10 0.84813 3.53712  10
  -7   3 -10 3.92086 3.69896  10
  -7   3 -10 3.08193 3.48586   3
  -8  -3 -10 7.40148 2.35800   9
   8  -3  10 6.95701 3.45652   6
  -8  -3 -10 8.04507 2.72475   3
  -8   3 -10 6.35285 3.34979  10
  -8   3 -10 5.48183 3.55395   3
  -9  -3 -10 6.44835 1.75101   9
   9  -3  10 7.14047 3.41152   6
  -9   3 -10 0.65693 2.14719  10
  -9   3 -10 3.49583 2.80895   3
 -11  -4  10 11.4057 1.86731   9
  11   4 -10 5.46307 3.32926   4
 -10  -4  10 18.6042 2.73644   9
  10   4 -10 19.1053 5.80746   4
  -9  -4  10 1.34112 2.17026   9
   9  -4 -10 0.59625 2.50401   6
   9   4 -10 4.01335 4.16904   4
  -8  -4  10 2.79003 2.12709   9
   8  -4 -10 -2.6437 2.17308   6
   8   4 -10 5.82876 4.60652   4
  -7  -4  10 58.2138 4.71939   9
   7  -4 -10 55.5352 5.60443   6
   6  -4 -10 180.637 12.0743   7
   6  -4 -10 199.763 11.9632   6
  -6  -4  10 202.643 10.8140   9
  -5  -4  10 127.215 7.55467   2
   5  -4 -10 124.409 9.17485   7
   5  -4 -10 132.632 8.59455   6
  -5  -4  10 135.736 7.52682   9
  -5   4  10 113.711 9.22751   5
  -5   4  10 117.014 9.10997   8
  -4  -4  10 180.394 10.2268   2
   4  -4 -10 179.473 11.9176   7
   4  -4 -10 177.867 11.1004   6
  -4  -4  10 186.534 9.97824   9
  -4   4  10 183.114 11.2815   5
  -4   4  10 177.012 11.6688   8
   3  -4 -10 703.818 37.0271   7
  -3  -4  10 697.439 35.1425   2
  -3  -4  10 706.373 34.6729   9
   3  -4 -10 702.789 35.8640   6
  -3   4  10 724.376 36.1516   5
  -3   4  10 669.722 36.2861   8
   2  -4 -10 1199.86 58.9221   6
  -2  -4  10 1187.74 58.2776   2
  -2  -4  10 1194.49 57.6671   9
  -2   4  10 1191.28 59.2015   8
   2   4 -10 1127.82 58.7921   4
  -2   4  10 1189.22 59.1353   5
  -1  -4  10 237.560 12.4242   9
  -1  -4  10 244.438 13.1387   2
   1  -4 -10 235.838 13.6878   6
  -1   4  10 232.129 13.9694   5
   0  -4  10 107.197 6.28715   9
   0  -4  10 114.670 7.47009   2
   0  -4 -10 114.074 7.54437   6
   0   4  10 109.889 8.02669   5
   0   4 -10 97.8615 7.56558   7
   1  -4  10 394.234 20.9320   6
  -1  -4 -10 379.983 20.7196  10
   1  -4  10 427.255 20.9921   2
   1  -4  10 408.432 20.9459   9
  -1  -4 -10 435.852 22.1907   6
   1   4  10 386.580 22.1100   5
  -1   4 -10 393.615 20.0694   5
  -1   4 -10 369.215 21.4823   7
  -2  -4 -10 68.2130 5.50793  10
   2  -4  10 61.8606 5.55066   6
   2  -4  10 62.7046 5.26701   2
   2  -4  10 74.1718 4.64931   9
   2   4  10 59.4371 6.33921   5
   3  -4  10 40.9398 5.13028   6
  -3  -4 -10 52.0990 5.15851  10
   3  -4  10 48.2633 4.79685   2
  -3   4 -10 49.1179 5.69611  10
   3   4  10 40.6148 5.86961   5
  -3   4 -10 48.9579 5.45723   8
  -4  -4 -10 11.9691 1.68324   9
  -4  -4 -10 4.79159 3.27580  10
   4  -4  10 5.79347 2.33338   2
   4  -4  10 8.00357 3.43650   6
  -4   4 -10 9.28175 3.49711  10
  -5  -4 -10 252.075 15.1120  10
  -5  -4 -10 225.208 12.5692   9
   5  -4  10 244.844 13.3586   2
  -5   4 -10 245.759 15.1333  10
   6  -4  10 95.8046 8.55057   6
  -6  -4 -10 80.8739 5.44295   9
   6  -4  10 82.8614 5.85240   2
  -6   4 -10 94.6074 8.79880  10
   7  -4  10 22.8977 4.70944   6
  -7  -4 -10 16.0579 2.46936   9
  -7   4 -10 26.7709 5.19497   3
  -7   4 -10 25.5748 4.69226  10
  -8  -4 -10 27.4323 2.85104   9
   8  -4  10 31.7680 4.94075   6
  -8   4 -10 20.2315 5.41207  10
  -8   4 -10 26.9961 4.60646   3
  -9  -4 -10 49.3858 3.42515   9
   9  -4  10 43.5168 5.33486   6
  -9   4 -10 49.8121 5.69331   3
  -9   4 -10 39.2004 5.11251  10
 -11  -5  10 8.24314 2.17042   9
  11   5 -10 8.00889 3.31237   4
  10  -5 -10 -3.9882 2.07432   6
 -10  -5  10 3.08387 1.84101   9
  10   5 -10 -1.5814 3.39712   4
  -9  -5  10 -2.5827 2.06222   9
   9   5 -10 -0.0146 3.86898   4
   8  -5 -10 3.98639 2.60702   6
  -8  -5  10 2.49035 2.22910   9
   7  -5 -10 1.74211 2.58902   6
  -7  -5  10 1.03229 1.97995   9
  -6  -5  10 0.80199 1.89423   9
   6  -5 -10 -0.9207 2.80365   6
   5  -5 -10 44.9552 5.25866   6
  -5  -5  10 38.1595 3.70583   2
  -5  -5  10 37.7136 4.00519   9
  -4  -5  10 43.5542 4.00836   9
   4  -5 -10 30.9646 4.54815   6
  -4  -5  10 49.5118 4.26656   2
  -4   5  10 53.3707 5.39423   8
  -4   5  10 37.5221 4.96270   5
  -3  -5  10 -0.9042 1.67525   9
  -3  -5  10 -1.0406 1.86583   2
   3  -5 -10 0.42077 2.43628   6
  -3   5  10 1.20597 2.32770   5
  -3   5  10 0.95114 2.11319   8
  -2  -5  10 9.12046 2.57467   2
   2  -5 -10 5.64087 2.67049   6
  -2  -5  10 5.70139 1.81606   9
  -2   5  10 4.09595 2.06274   8
  -2   5  10 3.61339 2.51396   5
  -1  -5  10 220.236 12.4633   2
  -1  -5  10 215.120 11.6765   9
   1  -5 -10 226.683 13.1356   6
  -1   5  10 207.734 13.2443   5
   0  -5  10 229.909 13.6946   6
   0  -5  10 270.303 14.2978   2
   0  -5 -10 264.585 14.8427   6
   0  -5  10 255.227 13.2704   9
   0   5  10 236.357 17.1750   5
  -1  -5 -10 5.95722 2.74083   6
   1  -5  10 3.37182 2.42026   2
   1  -5  10 -2.8216 1.86816   6
   1  -5  10 3.20495 1.75642   9
   1   5  10 10.0468 3.34519   5
   2  -5  10 3.05162 1.89058   9
   2  -5  10 1.88221 2.42975   2
   2  -5  10 3.43252 2.29148   6
   3  -5  10 54.3012 5.82749   6
   3  -5  10 62.5144 5.69793   2
  -3   5 -10 55.9934 6.18301  10
  -4  -5 -10 71.5842 5.35928   9
   4  -5  10 83.7620 7.28149   6
   4  -5  10 75.7159 6.11284   2
  -4   5 -10 76.6011 7.34425  10
   5  -5  10 -1.7688 2.73741   6
  -5  -5 -10 4.78426 1.80536   9
   5  -5  10 -4.8454 1.97578   2
  -5   5 -10 5.90429 3.36753  10
  -6  -5 -10 77.5771 5.05309   9
   6  -5  10 71.0167 5.63849   2
   6  -5  10 81.6552 7.81847   6
  -6   5 -10 81.8855 7.55612   3
  -6   5 -10 90.4751 7.61021  10
  -7  -5 -10 7.65728 1.80259   9
   7  -5  10 11.2972 5.16234   6
  -7   5 -10 8.18894 4.99688   3
  -7   5 -10 5.47668 2.55336  10
   8  -5  10 3.07932 2.96341   6
  -8  -5 -10 8.62033 2.17085   9
  -8   5 -10 7.85343 2.48057  10
  -8   5 -10 6.72455 3.15553   3
   9  -5  10 20.9270 3.34288   6
  -9   5 -10 32.9481 4.49101   3
 -10  -6  10 32.4609 3.29281   9
  10  -6 -10 26.2048 3.10703   6
  10   6 -10 23.0841 4.30022   4
  -9  -6  10 22.0747 2.72227   9
   9  -6 -10 20.0811 3.49318   6
   9   6 -10 23.1442 4.98882   4
   8  -6 -10 54.1863 5.64957   6
  -8  -6  10 50.1707 4.70016   9
  -7  -6  10 8.25776 2.49842   9
   7  -6 -10 7.88060 3.22696   6
  -6  -6  10 13.5616 2.68305   9
   6  -6 -10 12.7350 3.65655   6
  -5  -6  10 4.66191 2.29899   9
   5  -6 -10 2.74993 3.22855   6
  -5  -6  10 1.37577 1.94088   2
  -4  -6  10 67.4215 5.52091   2
   4  -6 -10 62.3377 6.68432   6
  -4  -6  10 74.6704 5.38573   9
  -3  -6  10 86.1006 6.36835   2
   3  -6 -10 79.8273 7.19808   6
  -3  -6  10 76.2214 5.62321   9
  -2  -6  10 17.5442 2.57050   9
  -2  -6  10 14.5103 3.18202   2
   2  -6 -10 20.9278 4.24534   6
  -2   6  10 7.86783 2.85969   8
   2   6 -10 15.8767 2.59267   8
  -1  -6  10 6.89043 2.04289   9
   1  -6 -10 3.35999 2.80217   6
  -1  -6  10 5.66534 2.67188   2
   0  -6 -10 5.66283 3.13648   6
   0  -6  10 9.26946 3.02853   2
   0  -6  10 4.42652 1.93184   9
   0  -6  10 6.36488 2.32549   6
   0   6 -10 6.43275 2.38117   8
   1  -6  10 73.5929 6.04865   6
   1  -6  10 74.4721 6.56188   2
  -1  -6 -10 76.5555 7.01568   6
   1  -6  10 74.0908 5.40857   9
   2  -6  10 376.599 18.8903   9
   2  -6  10 368.156 19.7907   2
   2  -6  10 354.567 20.0031   6
  -2   6 -10 351.864 20.3254  10
   3  -6  10 188.098 11.3391   2
   3  -6  10 175.890 11.7541   6
  -3   6 -10 189.477 12.0654  10
   4  -6  10 179.965 11.9403   6
   4  -6  10 179.160 11.0083   2
  -4   6 -10 176.764 11.7414  10
   5  -6  10 93.4284 6.57656   2
   5  -6  10 77.8019 7.69483   6
  -5   6 -10 85.5675 7.33997  10
   6  -6  10 40.3423 4.88599   2
   6  -6  10 37.8035 5.44415   6
  -6   6 -10 36.8618 5.17864   3
  -6   6 -10 37.9151 4.85931  10
   7  -6  10 11.0654 3.25136   6
  -7   6 -10 14.5915 3.62634   3
  -7   6 -10 13.1342 3.05457  10
   8  -6  10 12.5034 3.10360   6
  -8   6 -10 7.73011 2.63335   3
 -10  -7  10 2.36609 1.51852   9
  10   7 -10 3.99052 2.61686   4
   9  -7 -10 4.08056 2.09332   6
  -9  -7  10 -1.1302 1.70611   9
   9   7 -10 1.45532 3.04306   4
   8  -7 -10 0.63729 2.31181   6
  -8  -7  10 1.04740 1.91765   9
   8   7 -10 -1.2326 3.28280   4
  -7  -7  10 0.03906 2.07132   9
   7  -7 -10 3.56065 2.72525   6
   6  -7 -10 5.73982 3.18754   6
  -6  -7  10 5.99597 2.50379   9
   5  -7 -10 54.5034 6.25063   6
  -5  -7  10 47.0447 4.52654   2
  -5  -7  10 50.0175 4.79708   9
  -4  -7  10 161.552 9.40050   9
  -4  -7  10 154.939 9.79464   2
   4  -7 -10 159.322 11.2883   6
  -3  -7  10 334.504 18.5604   2
   3  -7 -10 343.778 19.7928   6
  -3  -7  10 343.342 17.9608   9
  -2  -7  10 10.7449 3.68745   2
  -2  -7  10 9.92025 2.55817   9
   2  -7 -10 9.60342 3.66022   6
  -1  -7  10 39.6685 4.01935   9
  -1  -7  10 42.9672 5.28590   2
   1  -7 -10 40.8382 6.32432   6
   0  -7  10 1.16565 2.22676   6
   0  -7 -10 0.05701 2.76778   6
   0  -7  10 2.44650 2.18105   9
   0  -7  10 0.02793 2.77242   2
   1  -7  10 23.4953 3.13587   9
   1  -7  10 20.2787 3.81045   2
  -1  -7 -10 20.9244 4.34704   6
   2  -7  10 1.51548 2.85246   2
   2  -7  10 0.74988 2.04751   9
   2  -7  10 -1.1290 2.22522   6
  -2   7 -10 1.22951 2.16976  10
   3  -7  10 7.64605 3.06793   6
   3  -7  10 2.12094 3.01001   2
  -3   7 -10 2.18708 3.08239  10
   4  -7  10 13.9998 3.01907   2
   4  -7  10 21.1518 4.00333   6
  -4   7 -10 17.7693 3.23009  10
   5  -7  10 6.77527 4.26390   2
   5  -7  10 9.77578 4.18412   6
  -5   7 -10 3.89943 2.43390  10
  -5   7 -10 -0.8938 3.01506   3
   6  -7  10 10.6955 2.25145   2
   6  -7  10 10.8971 3.28796   6
  -6   7 -10 12.1641 3.40198   3
   7  -7  10 8.75722 2.95399   6
  -7   7 -10 7.61504 2.69177   3
  -9  -8  10 5.83992 1.62109   9
   9  -8 -10 4.70444 1.90359   6
   9   8 -10 1.04550 2.20856   4
  -8  -8  10 52.7466 3.91401   9
   8  -8 -10 31.3183 4.15660   6
   8   8 -10 43.1691 5.27150   4
   7  -8 -10 5.47879 2.58527   6
  -7  -8  10 4.12133 2.29690   9
  -6  -8  10 4.07588 3.30537   9
   6  -8 -10 9.22848 4.64448   6
   5  -8 -10 99.9028 7.92084   6
  -5  -8  10 74.1503 5.86595   2
  -5  -8  10 91.1911 6.23391   9
   4  -8 -10 351.129 19.3266   6
  -4  -8  10 309.941 17.6270   2
   3  -8 -10 84.8455 7.97754   6
  -3  -8  10 71.2232 6.46056   2
  -3  -8  10 84.8089 5.94453   9
   2  -8 -10 10.3505 3.80326   6
  -2  -8  10 10.0948 2.43494   9
  -2  -8  10 13.7203 3.45601   2
  -1  -8  10 245.789 14.0803   2
  -1  -8  10 227.304 13.1693   9
   1  -8 -10 248.180 15.1105   6
   0  -8  10 13.0146 3.49246   2
   0  -8 -10 22.6738 4.61943   6
   0  -8  10 16.1498 2.79582   9
   1  -8  10 7.78389 2.51371   9
   1  -8  10 3.83049 2.38676   6
  -1  -8 -10 3.87633 3.19638   6
   1  -8  10 1.96504 2.97881   2
  -1   8 -10 3.54533 2.31503  10
   2  -8  10 37.3806 4.87859   6
   2  -8  10 46.3368 5.57055   2
  -2   8 -10 40.4341 4.64840  10
   3  -8  10 249.639 14.1920   2
   3  -8  10 235.941 14.2552   6
   4  -8  10 40.7447 4.79745   6
   4  -8  10 50.6099 5.06457   2
   5  -8  10 3.81967 2.15727   2
   5  -8  10 4.21746 2.64213   6
  -5   8 -10 4.72237 2.32878   3
   6  -8  10 24.6659 3.01222   2
   6  -8  10 25.7146 4.46855   6
  -6   8 -10 25.2685 3.55935   3
  -7  -9  10 1.16201 1.43604   9
   7  -9 -10 4.11571 3.75896   6
   7   9 -10 5.14469 2.42051   4
   6  -9 -10 1.45480 2.52757   6
  -6  -9  10 1.40809 1.65450   9
   6   9 -10 2.86782 2.63561   4
  -5  -9  10 1.25733 1.81656   9
   5  -9 -10 -3.9998 2.23287   6
   5   9 -10 2.78887 2.72546   4
  -4  -9  10 14.4818 2.44124   2
   4  -9 -10 19.4707 3.80641   6
  -4  -9  10 16.9642 2.61196   9
  -3  -9  10 50.1512 5.80586   2
  -2  -9  10 11.6028 2.87936   2
   2  -9 -10 12.5236 3.69460   6
  -2  -9  10 10.2694 2.51901   9
   1  -9 -10 12.2819 3.76364   6
  -1  -9  10 16.4340 2.85243   9
  -1  -9  10 11.5632 3.25759   2
   0  -9  10 24.8869 3.06495   9
   0  -9  10 28.7457 4.04275   2
   0  -9 -10 24.9351 4.21327   6
   1  -9  10 0.19742 2.14721   9
   1  -9  10 2.15003 2.96728   2
  -1  -9 -10 -2.2415 2.96104   6
   2  -9  10 -0.4370 2.29260   6
   2  -9  10 0.20836 2.63161   2
   3  -9  10 8.56359 2.42813   6
   3  -9  10 11.7424 3.02945   2
  -3   9 -10 3.96154 2.23098   3
   4  -9  10 0.14430 3.04255   6
   4  -9  10 1.21942 1.87297   2
   5  -9  10 0.33253 1.42157   2
  -5 -10  10 22.1942 2.44005   9
   5 -10 -10 17.7846 3.56571   6
  -4 -10  10 4.51992 1.62471   9
   4 -10 -10 10.1190 2.84846   6
  -4 -10  10 8.70588 1.96421   2
  -3 -10  10 51.9785 4.95585   2
   3 -10 -10 65.6431 5.80941   6
  -3 -10  10 73.2072 4.74585   9
  -2 -10  10 156.498 9.75591   2
  -2 -10  10 160.231 9.08278   9
   2 -10 -10 163.795 10.5221   6
  -1 -10  10 45.2428 3.86333   9
   1 -10 -10 39.9730 5.23425   6
  -1 -10  10 47.0680 4.96440   2
   0 -10 -10 19.2432 3.58535   6
   0 -10  10 15.1189 3.12891   2
   0 -10  10 17.5825 2.48134   9
   1 -10  10 9.60991 2.47446   2
   2 -10  10 3.35707 2.13815   2
   3 -10  10 15.2434 2.95770   2
  12   0 -11 2.17536 2.51110   4
 -11   0  11 1.54713 1.35718   9
  11   0 -11 0.83609 3.24735   4
  10   0 -11 6.84450 3.28396   7
  10   0 -11 1.25176 3.63361   4
 -10   0  11 -0.9862 1.47819   9
   9   0 -11 -2.1917 3.86099   4
   9   0 -11 -2.3160 3.00926   7
  -9   0  11 2.01701 1.53268   9
  -8   0  11 0.65908 1.43744   9
   8   0 -11 0.87566 3.88517   4
   7   0 -11 3.56010 4.01472   4
  -7   0  11 2.29302 2.10785   9
  -7   0  11 2.29760 2.47167   8
  -6   0  11 0.70205 2.18564   8
  -6   0  11 -0.8375 0.98721   9
   6   0 -11 -3.9011 3.04139   4
  -5   0  11 0.28696 2.21837   8
  -5   0  11 -0.4011 1.04639   5
  -5   0  11 -1.5311 1.73765   5
   4   0 -11 1.91700 2.92397   4
   3   0 -11 -1.0807 2.30076   7
  -3   0  11 0.95729 0.98886   5
   3   0 -11 4.32064 2.83832   4
   2   0 -11 1.08945 2.40003   7
  -2   0  11 0.02873 1.00769   5
   2   0 -11 -1.0125 2.40223   4
  -1   0  11 1.37334 1.23444   5
   1   0 -11 -1.3092 1.86484   4
   1   0 -11 2.77702 2.54410   7
   0   0  11 0.60810 1.42485   5
   0   0 -11 0.58969 0.92103   5
   0   0 -11 -0.7432 2.37586   7
   1   0  11 -0.7582 1.56052   5
  -1   0 -11 -1.0981 0.97395   5
  -1   0 -11 2.76380 2.17947   7
   2   0  11 -0.5260 1.98160   5
  -2   0 -11 0.47544 2.17778  10
   3   0  11 -1.1083 1.86898   5
  -3   0 -11 -0.9550 2.32591  10
  -4   0 -11 0.63619 2.90981  10
   4   0  11 0.73632 1.24553   2
  -5   0 -11 2.98720 2.65956   8
  -5   0 -11 3.92053 3.37183  10
  -6   0 -11 -0.8299 3.26138  10
  -6   0 -11 -1.4387 3.25427   3
  -7   0 -11 -1.1216 3.64399  10
  -7   0 -11 -0.3370 3.25608   3
  -8   0 -11 3.42191 3.34474  10
  -8   0 -11 2.78184 3.12214   3
  -9   0 -11 2.57354 2.95285  10
  -9   0 -11 0.53374 2.48982   3
 -10   0 -11 1.50319 1.94053   3
  10   0  11 -2.0178 2.55607   6
 -12  -1  11 -1.1989 1.26651   9
  12  -1 -11 -0.8741 2.37291   4
  12   1 -11 1.12253 2.45291   4
  11  -1 -11 9.90274 3.89365   4
 -11  -1  11 16.5776 2.10543   9
  11   1 -11 11.8392 3.66463   7
  11   1 -11 14.7171 4.30246   4
  10  -1 -11 42.3311 6.48876   4
 -10  -1  11 34.3966 3.54235   9
  10   1 -11 42.8163 6.87548   4
 -10   1  11 41.6549 3.32559   9
  -9  -1  11 36.1304 3.49507   9
   9  -1 -11 34.4287 6.30601   4
   9  -1 -11 35.3602 5.03816   7
   9   1 -11 34.4805 6.27970   4
  -9   1  11 33.2923 3.08945   9
   8  -1 -11 64.7225 8.00603   4
  -8  -1  11 62.6688 4.50601   9
   8  -1 -11 76.0904 7.22540   7
  -8   1  11 62.5388 4.25262   9
   8   1 -11 73.5464 13.5627   4
  -7  -1  11 5.69790 1.58089   9
   7  -1 -11 -0.4768 3.66565   4
   7  -1 -11 -3.2685 2.56409   7
   7   1 -11 2.84960 3.78652   4
  -7   1  11 7.25465 1.47746   9
   6  -1 -11 72.3957 6.95303   7
  -6  -1  11 73.7673 4.67813   2
  -6  -1  11 66.1571 4.40920   9
   6  -1 -11 80.4253 7.76475   4
   6   1 -11 67.0482 7.39095   4
  -6   1  11 59.0253 6.31393   8
   5  -1 -11 481.241 26.5395   4
  -5  -1  11 435.563 23.8325   5
  -5  -1  11 472.038 23.6497   9
   5  -1 -11 502.628 26.5150   7
  -5  -1  11 479.431 23.5308   5
   5   1 -11 485.048 26.5188   4
  -5   1  11 485.014 24.5021   5
  -5   1  11 489.644 25.7631   8
   4  -1 -11 1075.19 55.5419   7
   4  -1 -11 1086.25 55.5309   4
  -4   1  11 1144.66 55.0005   8
  -4   1  11 1092.43 53.6193   5
   4   1 -11 1043.20 55.1362   4
   3  -1 -11 24.4532 4.37271   4
   3  -1 -11 22.9107 4.33826   7
   3   1 -11 23.5941 4.08057   4
  -3   1  11 18.5189 2.64976   5
   2  -1 -11 18.8820 3.99153   7
   2  -1 -11 17.5681 3.76168   4
   2   1 -11 21.6640 4.09171   4
   2   1 -11 22.5185 4.07785   7
  -2   1  11 20.3665 2.78267   5
  -1  -1  11 521.055 28.8538   5
   1  -1 -11 619.079 31.5023   7
  -1   1  11 625.217 29.9290   5
   1   1 -11 588.763 31.0377   7
   0  -1 -11 1156.02 58.5309   7
   0  -1  11 1022.74 56.7913   5
   0  -1 -11 1231.66 57.1452   5
   0   1  11 1170.75 57.5378   5
   0   1 -11 1145.28 58.2738   7
   0   1 -11 1212.58 56.4261   5
  -1  -1 -11 135.792 8.49986  10
   1  -1  11 114.460 8.05177   5
  -1  -1 -11 124.622 9.11657   7
  -1   1 -11 138.783 7.59605   5
  -1   1 -11 123.984 8.69847   7
   1   1  11 121.641 8.54843   5
  -2  -1 -11 500.291 25.7674  10
   2  -1  11 490.361 24.5230   2
  -2   1 -11 495.120 25.8847  10
  -2   1 -11 451.041 25.4409   7
   2   1  11 473.182 27.1347   5
  -3  -1 -11 834.035 41.5704  10
   3  -1  11 791.153 39.9058   2
   3   1  11 739.754 41.8037   5
  -3   1 -11 854.416 41.7791  10
   4  -1  11 94.7412 6.79075   2
  -4  -1 -11 114.588 8.81178  10
  -4   1 -11 120.378 8.89878  10
   4   1  11 86.1314 9.33853   5
  -5  -1 -11 -0.4039 2.61533   8
  -5  -1 -11 4.67096 3.47036  10
   5  -1  11 2.77336 1.53913   2
  -5  -1 -11 7.30482 3.31136   3
  -5   1 -11 6.38610 3.73003  10
  -6  -1 -11 3.44286 3.81943  10
  -6  -1 -11 2.08419 2.96288   3
  -6   1 -11 0.90108 3.35506  10
  -6   1 -11 3.32164 3.63206   3
  -7  -1 -11 82.6260 7.54525   3
  -7  -1 -11 80.6807 8.51049  10
  -7   1 -11 83.1824 8.12072   3
  -7   1 -11 83.9125 8.43178  10
  -8  -1 -11 172.319 12.3309   3
  -8  -1 -11 191.650 13.0318  10
  -8   1 -11 191.388 12.7244   3
  -8   1 -11 203.923 13.1029  10
  -9  -1 -11 4.72892 2.70665   3
   9  -1  11 9.28017 3.21205   6
  -9   1 -11 13.4017 3.83535   3
  -9   1 -11 10.5040 3.34937  10
 -10  -1 -11 2.72792 1.80974   3
  10  -1  11 -1.1160 2.30135   6
 -10   1 -11 2.19361 2.23368   3
  12   2 -11 -0.0854 2.78827   4
  11  -2 -11 4.91533 3.08641   4
 -11  -2  11 2.21971 1.55730   9
  11   2 -11 2.42056 3.32865   4
  10  -2 -11 2.09766 3.18829   4
 -10  -2  11 -2.1322 1.68832   9
  10   2 -11 0.65279 3.83767   4
   9  -2 -11 -0.8800 3.56608   4
   9  -2 -11 -3.2445 3.09255   7
  -9  -2  11 0.72756 1.72615   9
   9   2 -11 0.67179 4.11690   4
   8  -2 -11 4.20943 4.72101   4
   8  -2 -11 2.44060 3.14641   7
  -8  -2  11 5.68849 1.92415   9
   8   2 -11 -1.1729 3.81848   4
  -7  -2  11 2.46917 1.61152   9
   7  -2 -11 -0.6612 2.45945   7
   7  -2 -11 3.67078 4.00407   4
   7   2 -11 -0.2244 3.39075   4
  -6  -2  11 2.75136 1.42519   9
   6  -2 -11 -1.5751 3.33996   4
   6  -2 -11 3.16127 2.55102   7
  -6  -2  11 -0.2345 1.47450   2
  -6   2  11 4.15723 2.73413   8
   6   2 -11 -3.3636 2.93546   4
  -5  -2  11 60.4524 4.40369   2
   5  -2 -11 62.4760 6.55941   7
   5  -2 -11 65.3763 7.19741   4
  -5  -2  11 58.3349 4.10050   9
  -5   2  11 62.5040 6.11843   8
  -5   2  11 65.5392 5.17368   5
   5   2 -11 66.7885 6.70829   4
   4  -2 -11 18.1871 4.21876   7
   4  -2 -11 18.6258 4.47178   4
  -4  -2  11 14.1611 1.66139   9
  -4  -2  11 15.5317 2.40139   2
   4   2 -11 13.2959 3.68969   4
  -4   2  11 13.0522 3.25239   8
  -4   2  11 14.1114 2.50271   5
   3  -2 -11 110.952 8.60281   7
   3  -2 -11 101.192 8.37563   4
  -3  -2  11 102.298 6.54892   2
  -3  -2  11 93.4933 5.69393   9
  -3   2  11 108.656 6.89390   5
  -3   2  11 102.415 7.78459   8
   3   2 -11 108.627 7.73266   4
   2  -2 -11 27.5223 4.76471   7
  -2  -2  11 27.0032 2.20056   9
  -2   2  11 30.6030 3.61148   5
   2   2 -11 29.7340 4.18543   4
   1  -2 -11 15.5888 2.49082   6
  -1  -2  11 16.8773 1.72082   9
  -1  -2  11 19.5565 2.70920   2
   1  -2 -11 17.4347 3.97547   7
  -1   2  11 16.8096 2.94618   5
   1   2 -11 20.1132 3.66057   7
   0  -2  11 88.6759 5.90683   2
   0  -2 -11 87.5492 6.14269  10
   0  -2  11 80.7694 4.96459   9
   0  -2 -11 85.1165 7.37207   7
   0   2 -11 90.4225 4.73197   5
   0   2 -11 90.7530 6.90956   7
   0   2  11 90.4258 6.75260   5
   1  -2  11 275.581 14.6824   2
  -1  -2 -11 279.018 15.3702  10
  -1   2 -11 255.765 15.5224   7
  -1   2 -11 282.771 14.3492   5
  -2  -2 -11 33.9695 4.35794  10
   2  -2  11 33.3082 3.53339   2
  -2   2 -11 25.1593 3.12729   5
   2   2  11 30.9903 4.59521   5
  -2   2 -11 23.0644 3.78186   7
   3  -2  11 3.45343 1.70977   2
  -3  -2 -11 2.51924 2.57232  10
   3   2  11 0.51203 2.42039   5
  -3   2 -11 2.39505 4.58468  10
  -4  -2 -11 534.538 26.8889  10
  -4  -2 -11 487.591 25.5933   3
   4  -2  11 483.372 24.7288   2
   4   2  11 406.775 26.9338   5
  -4   2 -11 526.621 26.9563  10
  -4   2 -11 474.595 26.5660   8
  -5  -2 -11 142.402 10.7212  10
   5  -2  11 135.066 8.34736   2
  -5  -2 -11 144.447 9.68242   3
  -5   2 -11 149.015 10.7513  10
  -6  -2 -11 9.85321 3.96768  10
  -6  -2 -11 7.05394 3.16436   3
  -6   2 -11 11.9041 4.06600   3
  -6   2 -11 7.67204 3.85377  10
  -7  -2 -11 6.08237 3.91980  10
  -7  -2 -11 5.56317 3.02334   3
  -7   2 -11 5.48986 3.63488  10
  -7   2 -11 8.05238 4.01819   3
  -8  -2 -11 -0.0105 2.96835  10
   8  -2  11 6.72130 5.03910   6
  -8  -2 -11 4.04595 2.83101   3
  -8   2 -11 3.67474 3.29803  10
  -9  -2 -11 5.06656 2.46594   3
   9  -2  11 5.59246 2.96729   6
  -9   2 -11 8.16052 2.90143  10
  -9   2 -11 4.09756 3.15616   3
 -12  -3  11 22.4652 2.22013   9
  12   3 -11 18.7403 3.31319   7
  12   3 -11 22.7161 4.03902   4
 -11  -3  11 -0.6438 1.54449   9
  11   3 -11 1.64157 3.06568   4
 -10  -3  11 1.37033 2.44450   9
  10   3 -11 3.86660 4.03227   4
  -9  -3  11 28.1523 3.19405   9
   9  -3 -11 28.7778 5.50319   4
   9   3 -11 20.7697 5.45381   4
   8  -3 -11 38.4627 6.45606   4
   8  -3 -11 27.3719 6.30390   7
  -8  -3  11 49.4110 4.07359   9
   8   3 -11 47.9395 7.13657   4
   7  -3 -11 87.4092 8.74453   4
   7  -3 -11 68.0834 6.95291   7
  -7  -3  11 80.2450 5.55918   9
   7  -3 -11 86.4458 6.30550   6
   7   3 -11 91.7162 9.15148   4
   6  -3 -11 94.1531 7.81184   7
  -6  -3  11 72.8293 5.56520   2
  -6  -3  11 91.6587 5.86448   9
   6  -3 -11 102.669 9.25216   4
   6  -3 -11 96.6849 6.55766   6
  -6   3  11 92.0617 6.90565   5
   6   3 -11 110.066 8.93057   4
   5  -3 -11 162.472 9.88828   6
   5  -3 -11 173.890 12.2700   4
  -5  -3  11 154.609 9.18897   2
  -5  -3  11 167.154 9.10067   9
   5   3 -11 183.859 11.8634   4
  -5   3  11 156.024 10.1512   5
  -4  -3  11 66.6991 4.55864   9
   4  -3 -11 75.5926 5.49857   6
   4  -3 -11 69.3625 7.04957   7
  -4  -3  11 69.3275 5.03122   2
   4   3 -11 82.6628 7.03722   4
  -4   3  11 79.0403 6.46514   8
  -4   3  11 72.9980 5.83029   5
   3  -3 -11 101.823 8.38249   7
  -3  -3  11 98.4599 5.65516   9
  -3  -3  11 103.146 6.40574   2
   3  -3 -11 92.1167 6.46948   6
  -3   3  11 94.7555 6.85236   5
  -3   3  11 94.1253 7.48109   8
   3   3 -11 92.8826 7.31365   4
   2  -3 -11 486.637 25.8080  10
   2  -3 -11 529.008 28.3256   7
   2  -3 -11 527.646 26.6685   6
  -2  -3  11 507.230 25.5921   9
  -2  -3  11 530.269 26.3531   2
  -2   3  11 531.803 27.3636   5
   2   3 -11 493.829 26.9310   4
  -2   3  11 529.236 27.3311   8
   1  -3 -11 144.101 8.88879   6
  -1  -3  11 143.808 8.72519   2
   1  -3 -11 155.844 10.7787   7
   1  -3 -11 134.929 8.28272  10
  -1  -3  11 147.363 7.88750   9
  -1   3  11 151.697 9.56281   5
   0  -3  11 160.752 9.46539   2
   0  -3 -11 147.232 9.36018  10
   0  -3 -11 175.079 9.81945   6
   0  -3  11 169.297 8.75295   9
   0   3 -11 151.097 10.1972   7
   0   3  11 171.235 10.5710   5
   1  -3  11 593.530 29.2129   9
   1  -3  11 572.183 29.9591   6
  -1  -3 -11 604.612 30.3911  10
   1  -3  11 602.158 32.1826   2
  -1   3 -11 557.909 30.5135   7
  -1   3 -11 608.248 29.2767   5
   1   3  11 590.307 31.2914   5
  -2  -3 -11 411.224 21.7275  10
   2  -3  11 399.978 21.3345   6
   2  -3  11 416.278 20.9967   2
   2   3  11 374.953 22.5055   5
   3  -3  11 8.65435 2.35572   2
   3  -3  11 8.64648 2.51311   6
  -3  -3 -11 3.45692 2.67855   3
  -3  -3 -11 13.1999 3.44693  10
  -3   3 -11 8.56405 3.37015  10
   3   3  11 7.59091 2.82303   5
  -4  -3 -11 10.4928 3.50126  10
  -4  -3 -11 14.4060 3.57174   3
   4  -3  11 17.9793 2.90870   2
   4  -3  11 18.1684 3.69172   6
  -4   3 -11 15.1447 4.02568  10
  -5  -3 -11 56.6560 6.78417  10
   5  -3  11 46.7632 4.51430   2
  -5  -3 -11 52.0725 5.28427   3
   5  -3  11 58.4761 6.27380   6
  -5   3 -11 61.0645 6.81889  10
  -6  -3 -11 282.600 16.8225  10
  -6  -3 -11 252.553 15.2595   3
   6  -3  11 269.161 16.3853   6
  -6   3 -11 271.918 16.8610  10
  -7  -3 -11 53.1850 6.61143  10
  -7  -3 -11 37.7147 4.95763   3
   7  -3  11 47.7002 6.05718   6
  -7   3 -11 47.2599 6.30391  10
  -7   3 -11 46.5495 6.20608   3
  -8  -3 -11 15.8375 2.88989   3
  -8  -3 -11 10.5540 1.96092   9
   8  -3  11 9.79351 3.80949   6
  -8   3 -11 9.19674 3.67023   3
  -8   3 -11 8.46927 3.29181  10
  -9  -3 -11 12.5661 1.78826   9
   9  -3  11 15.1295 3.23925   6
  -9   3 -11 17.2784 3.05761  10
  -9   3 -11 24.2370 4.03550   3
 -11  -4  11 -1.6017 1.36144   9
  11   4 -11 6.38234 3.17806   4
 -10  -4  11 34.7375 3.69342   9
  10   4 -11 34.8287 5.73454   4
  -9  -4  11 42.2051 4.07340   9
   9   4 -11 38.0221 6.23474   4
  -8  -4  11 17.0653 2.62493   9
   8  -4 -11 20.1438 3.45107   6
   8   4 -11 26.6010 6.05681   4
   7  -4 -11 14.7682 3.37398   6
   7   4 -11 13.9281 4.90884   4
   6  -4 -11 78.2561 6.87592   7
   6  -4 -11 85.2044 6.48852   6
  -6  -4  11 71.1594 5.50061   2
  -6  -4  11 89.8330 5.63459   9
   5  -4 -11 12.4711 3.54286   7
   5  -4 -11 13.0151 3.02709   6
  -5  -4  11 10.0832 2.16958   9
  -5  -4  11 7.33756 1.97811   2
  -5   4  11 8.87019 2.54546   5
  -4  -4  11 26.9818 3.04400   9
   4  -4 -11 28.2892 4.87622   7
   4  -4 -11 30.0939 3.89016   6
  -4  -4  11 32.2662 3.53410   2
  -4   4  11 22.8854 3.59263   5
   3  -4 -11 4.28513 3.23437   7
  -3  -4  11 2.12104 1.49811   9
  -3  -4  11 3.67272 1.87893   2
   3  -4 -11 1.55059 2.11041   6
  -3   4  11 1.61977 2.20191   8
   3   4 -11 3.30172 2.72852   4
  -3   4  11 1.33065 1.95117   5
  -2  -4  11 90.9176 6.38473   2
  -2  -4  11 88.8680 5.49497   9
   2  -4 -11 94.8001 6.78030   6
   2  -4 -11 92.0432 8.01496   7
  -2   4  11 85.4215 6.92615   8
   2   4 -11 90.8559 6.74676   4
  -2   4  11 89.1364 7.00983   5
  -1  -4  11 88.2288 5.63895   9
   1  -4 -11 111.079 7.21542   6
  -1  -4  11 94.7950 6.54356   2
  -1   4  11 87.9849 7.38709   5
   0  -4  11 -0.4969 2.24037   9
   0  -4  11 0.32523 1.98814   2
   0   4 -11 -2.4638 2.01281   7
   0   4  11 -0.2044 1.95632   5
  -1  -4 -11 200.890 11.5775  10
   1  -4  11 214.655 11.8653   2
   1  -4  11 195.063 11.6258   6
   1  -4  11 211.185 10.9844   9
  -1  -4 -11 222.700 12.3606   6
  -1   4 -11 195.768 11.9170   7
   1   4  11 191.734 12.9591   5
   2  -4  11 14.0460 2.90337   2
  -2  -4 -11 15.4607 2.93458  10
   2  -4  11 12.4655 3.10761   6
   2   4  11 23.1218 4.11159   5
   3  -4  11 387.091 21.1261   6
   3  -4  11 386.219 20.4546   2
  -3  -4 -11 377.014 21.1608  10
  -3   4 -11 390.075 21.7837  10
   4  -4  11 363.581 21.4043   6
  -4  -4 -11 406.021 21.7126  10
   4  -4  11 369.984 20.2903   2
  -4   4 -11 400.911 22.0207  10
   5  -4  11 89.0483 6.30483   2
   5  -4  11 80.7252 7.84834   6
  -5  -4 -11 94.0396 7.78696  10
  -5  -4 -11 79.3982 5.23511   9
  -5   4 -11 94.9778 8.20216  10
   6  -4  11 27.2108 5.00825   6
  -6  -4 -11 25.6320 2.60421   9
   6  -4  11 29.7854 3.42006   2
  -6   4 -11 28.3260 4.91183  10
   7  -4  11 12.9716 3.85208   6
  -7   4 -11 19.4228 4.16884  10
  -7   4 -11 14.6001 4.46586   3
   8  -4  11 21.4944 3.88388   6
  -8  -4 -11 15.5433 2.09460   9
  -8   4 -11 34.6979 5.04639   3
  -8   4 -11 24.4407 4.01697  10
   9  -4  11 -1.4000 2.83230   6
  -9   4 -11 -0.4092 2.05465   3
 -11  -5  11 10.1682 1.67310   9
  11   5 -11 7.54759 3.19997   4
 -10  -5  11 16.4599 2.24755   9
  10   5 -11 19.4319 4.47514   4
  -9  -5  11 5.06276 3.01145   9
   9  -5 -11 14.8914 2.80923   6
   9   5 -11 4.89422 4.12179   4
  -8  -5  11 3.97800 2.26048   9
   8  -5 -11 8.68982 2.73809   6
   8   5 -11 1.56859 4.19564   4
   7  -5 -11 44.9860 5.27805   6
  -7  -5  11 44.4551 4.35053   9
   6  -5 -11 108.918 8.15006   6
  -5  -5  11 44.4833 4.50407   2
  -5  -5  11 62.2272 4.68647   9
   5  -5 -11 59.5294 5.86928   6
  -4  -5  11 84.0330 6.37069   2
  -4  -5  11 94.5079 6.05360   9
   4  -5 -11 95.6704 7.27253   6
   3  -5 -11 229.893 13.5234   6
  -3  -5  11 228.910 12.1291   9
  -3  -5  11 233.596 12.8648   2
  -3   5  11 221.171 13.6656   8
   3   5 -11 221.073 13.5931   4
  -3   5  11 213.038 13.7128   5
  -2  -5  11 211.861 11.8619   2
  -2  -5  11 206.506 10.9305   9
   2  -5 -11 205.892 12.3575   6
   2   5 -11 194.073 11.9106   4
  -2   5  11 193.514 12.6181   5
  -2   5  11 189.147 12.1262   8
   1  -5 -11 205.767 12.4407   6
  -1  -5  11 197.048 10.9371   9
  -1  -5  11 206.058 11.9759   2
   0  -5  11 44.3025 3.74752   9
   0  -5  11 43.2868 4.97198   2
   0  -5 -11 42.3306 5.12077   6
   0   5 -11 29.9589 4.21755   7
   0   5  11 48.4392 5.39498   5
   1  -5  11 15.0771 3.22325   2
  -1  -5 -11 11.5068 3.37520   6
   1  -5  11 8.50460 2.66311   6
   1  -5  11 12.8656 2.24195   9
   2  -5  11 4.61002 2.29084   6
   2  -5  11 5.46780 2.78983   2
   3  -5  11 269.078 14.7033   2
   3  -5  11 247.743 15.1012   6
  -3   5 -11 254.365 15.7440  10
   4  -5  11 328.425 17.4242   2
   4  -5  11 305.365 18.3045   6
  -4   5 -11 320.916 18.7239  10
   5  -5  11 177.067 10.4756   2
   5  -5  11 179.162 11.8495   6
  -5   5 -11 168.121 13.7790  10
   6  -5  11 4.53808 2.03434   2
   6  -5  11 8.57005 3.38684   6
  -6   5 -11 7.28784 3.23603  10
  -6   5 -11 7.46790 3.59090   3
   7  -5  11 5.09300 3.21160   6
  -7   5 -11 2.05107 2.97982   3
   8  -5  11 7.27995 3.08237   6
  -8   5 -11 1.96367 2.73289  10
  -8   5 -11 6.18410 3.03686   3
 -10  -6  11 2.10932 1.67567   9
  10   6 -11 2.00859 3.10653   4
  -9  -6  11 -1.0519 1.79710   9
   9  -6 -11 2.79077 2.12042   6
   9   6 -11 -0.3586 3.42899   4
  -8  -6  11 2.51411 2.25323   9
   8   6 -11 -2.9635 3.36001   4
  -7  -6  11 11.6329 2.62793   9
   7  -6 -11 8.15078 3.04535   6
   6  -6 -11 64.5212 6.53869   6
  -6  -6  11 68.0215 5.33689   9
   5  -6 -11 2.04684 2.71772   6
  -5  -6  11 6.51119 2.16732   2
  -5  -6  11 5.16183 2.40116   9
  -4  -6  11 3.14616 2.17789   2
  -4  -6  11 0.77545 2.00159   9
   4  -6 -11 2.65094 2.87784   6
   3  -6 -11 5.50676 2.96926   6
  -3  -6  11 0.91866 2.47004   2
  -3  -6  11 5.69773 2.08497   9
   3   6 -11 6.66711 3.05683   4
  -2  -6  11 3.01615 2.01207   9
  -2  -6  11 1.71298 2.63116   2
   2  -6 -11 -0.2522 2.81132   6
   2   6 -11 6.62712 2.73759   8
  -2   6  11 -0.1641 2.75537   8
  -1  -6  11 139.215 9.05424   2
  -1  -6  11 139.612 7.96204   9
   1  -6 -11 141.285 9.70594   6
   1   6 -11 114.627 8.66260   8
   0  -6 -11 9.80813 3.32727   6
   0  -6  11 9.92278 3.10054   2
   0  -6  11 10.1643 2.44818   9
   1  -6  11 17.7955 3.27781   6
   1  -6  11 22.2223 3.89156   2
   1  -6  11 25.1223 2.94172   9
  -1  -6 -11 23.5286 4.10090   6
   2  -6  11 4.04506 2.90703   2
   2  -6  11 2.19087 1.96454   9
   2  -6  11 -1.9019 2.51032   6
  -2   6 -11 -2.2188 2.47634  10
   3  -6  11 169.309 11.6956   6
   3  -6  11 197.513 11.5625   2
  -3   6 -11 192.770 12.1848  10
   4  -6  11 36.8713 4.82862   6
   4  -6  11 44.1717 4.98470   2
  -4   6 -11 31.4420 5.93668  10
   5  -6  11 -1.9129 1.95183   2
   5  -6  11 1.36485 2.73314   6
  -5   6 -11 -4.6709 2.14426  10
   6  -6  11 1.81366 1.71273   2
   6  -6  11 2.12789 2.61242   6
  -6   6 -11 5.26591 2.81588  10
  -6   6 -11 4.80599 3.01123   3
   7  -6  11 13.2780 3.45139   6
  -7   6 -11 19.0079 3.70761  10
  -7   6 -11 13.8175 3.17091   3
   8  -6  11 0.77534 2.17611   6
  -8   6 -11 -0.1531 2.04325   3
   9  -7 -11 -0.8422 1.86521   6
  -9  -7  11 2.59570 1.79729   9
   9   7 -11 0.86641 2.82125   4
  -8  -7  11 0.59542 1.80752   9
   8  -7 -11 4.98759 2.30925   6
   8   7 -11 -6.4339 2.67394   4
   7  -7 -11 38.7766 6.24626   6
  -7  -7  11 58.3694 4.74055   9
   7   7 -11 60.6917 7.29122   4
   6  -7 -11 1.71274 2.67410   6
  -6  -7  11 11.0656 2.50940   9
   5  -7 -11 23.3715 4.24812   6
  -5  -7  11 25.3268 3.22546   2
  -5  -7  11 25.3915 3.26059   9
   4  -7 -11 17.2757 4.07267   6
  -4  -7  11 21.2067 2.97792   9
  -4  -7  11 18.6701 3.24516   2
  -3  -7  11 689.899 35.3704   2
  -3  -7  11 716.451 34.7152   9
   3  -7 -11 731.190 36.5458   6
   3   7 -11 632.473 35.5812   4
  -2  -7  11 73.3373 5.38669   9
   2  -7 -11 69.1632 7.10581   6
  -2  -7  11 71.5840 6.51360   2
   1  -7 -11 35.1993 5.16028   6
  -1  -7  11 27.4686 3.36753   9
  -1  -7  11 34.8179 4.69934   2
   0  -7 -11 64.6791 6.87826   6
   0  -7  11 60.6543 6.29820   2
   0  -7  11 57.8331 5.00237   9
  -1  -7 -11 372.598 20.5128   6
   1  -7  11 311.656 19.6600   6
   1  -7  11 367.092 18.8140   9
   1  -7  11 394.554 20.0446   2
   2  -7  11 354.506 19.6713   6
   2  -7  11 380.170 20.0066   2
  -2   7 -11 350.318 20.2146  10
   3  -7  11 16.0612 3.49993   2
   3  -7  11 22.0070 3.79216   6
  -3   7 -11 17.3836 3.61366  10
   4  -7  11 7.28373 2.83117   2
   4  -7  11 8.38603 3.14315   6
  -4   7 -11 3.76395 2.47713  10
   5  -7  11 4.01969 2.68579   6
   5  -7  11 0.49694 1.89651   2
  -5   7 -11 1.43882 2.75567   3
  -5   7 -11 1.35649 2.66348  10
   6  -7  11 4.12537 2.56337   6
   6  -7  11 1.36667 1.71848   2
  -6   7 -11 1.84453 2.57708   3
   7  -7  11 27.8694 3.62461   6
  -7   7 -11 24.7007 3.37039   3
  -8  -8  11 -1.2014 1.49291   9
   8  -8 -11 0.52649 1.80900   6
   8   8 -11 4.94005 2.52700   4
  -7  -8  11 1.60146 1.82588   9
   7  -8 -11 6.33304 2.48959   6
   7   8 -11 0.43353 2.65415   4
  -6  -8  11 1.46541 2.11554   9
   6  -8 -11 1.37309 2.33923   6
   6   8 -11 -0.2263 2.81631   4
  -5  -8  11 15.1268 2.58854   9
   5  -8 -11 16.3087 3.79882   6
  -4  -8  11 17.1773 2.83274   2
   4  -8 -11 22.5671 4.56989   6
  -4  -8  11 15.9966 2.90058   9
   4   8 -11 14.1089 3.76215   4
   3  -8 -11 4.45789 3.15213   6
  -3  -8  11 3.95000 2.71755   2
  -3  -8  11 3.52702 2.41870   9
   2  -8 -11 2.08001 3.06349   6
  -2  -8  11 -0.3369 2.49454   2
  -2  -8  11 1.80627 2.27755   9
  -1  -8  11 6.13790 3.02932   2
  -1  -8  11 4.76599 2.24640   9
   1  -8 -11 4.01722 3.26414   6
   0  -8  11 12.7365 3.45022   2
   0  -8 -11 11.5520 3.88640   6
   0  -8  11 11.8156 2.55398   9
   1  -8  11 15.7972 3.56267   2
   1  -8  11 19.4459 2.94860   9
  -1  -8 -11 19.5164 4.30973   6
  -1   8 -11 12.9421 3.06488  10
   2  -8  11 2.08025 2.24809   6
   2  -8  11 -1.1770 2.44128   2
  -2   8 -11 8.90529 2.59606  10
   3  -8  11 13.9642 4.11011   2
   3  -8  11 20.7766 3.20309   6
   4  -8  11 3.66284 2.20238   2
   4  -8  11 2.97801 2.24445   6
   5  -8  11 1.25796 2.20375   6
   5  -8  11 5.16950 2.01647   2
  -5   8 -11 -0.7999 1.82358   3
   6  -8  11 3.84395 1.75818   2
   6  -8  11 -0.3338 1.81287   6
  -6   8 -11 -4.1968 1.71876   3
  -7  -9  11 0.81487 1.57740   9
   7  -9 -11 -3.0876 1.57971   6
   7   9 -11 -1.4555 1.99663   4
   6  -9 -11 -2.4039 1.86838   6
  -6  -9  11 3.88144 1.86518   9
   6   9 -11 -2.1292 2.25094   4
   5  -9 -11 42.5254 5.19855   6
  -5  -9  11 46.3194 4.20768   9
   4  -9 -11 91.7583 7.54413   6
  -4  -9  11 90.6813 5.99649   9
  -4  -9  11 80.4199 6.06837   2
   3  -9 -11 87.2361 7.53654   6
  -3  -9  11 85.2400 6.45060   2
  -3  -9  11 86.1132 5.94397   9
   2  -9 -11 4.87825 4.13098   6
  -2  -9  11 4.20386 2.89800   9
  -1  -9  11 8.84597 2.81672   9
   1  -9 -11 11.5111 5.38469   6
  -1  -9  11 10.1120 4.81771   2
   0  -9 -11 5.42966 5.40902   6
   0  -9  11 1.48467 3.59453   2
   0  -9  11 4.07830 2.86942   9
   1  -9  11 89.4791 7.06567   2
   2  -9  11 65.7532 5.75993   2
   3  -9  11 45.9976 4.69206   2
  -3   9 -11 47.9418 6.48698   3
   4  -9  11 90.8076 6.21601   2
  -4   9 -11 90.9152 7.10683   3
   5  -9  11 30.7894 2.84317   2
   5 -10 -11 4.26121 1.82124   6
  -5 -10  11 4.22215 1.63726   9
  -4 -10  11 20.2510 2.42425   9
  -4 -10  11 19.4795 2.26005   2
   4 -10 -11 24.4416 3.42006   6
   3 -10 -11 18.4920 3.32512   6
  -3 -10  11 28.4344 2.84063   9
  -3 -10  11 23.5183 3.04578   2
  -2 -10  11 1.20900 1.69833   9
   2 -10 -11 2.14443 2.50542   6
  -2 -10  11 -1.3376 1.81623   2
   1 -10 -11 2.31164 2.45251   6
  -1 -10  11 9.30534 2.53174   2
  -1 -10  11 5.37461 1.82700   9
   0 -10  11 9.00532 2.69838   2
   0 -10  11 14.1649 2.25048   9
   1 -10  11 4.38381 2.42710   2
   2 -10  11 1.38614 2.01101   2
   3 -10  11 4.96677 1.86180   2
  12   0 -12 10.6577 3.67242   4
  11   0 -12 3.77269 3.61445   4
  10   0 -12 14.8288 3.85978   7
 -10   0  12 20.4363 2.08926   9
  10   0 -12 24.0640 5.47956   4
  -9   0  12 6.30106 1.57853   9
   9   0 -12 0.13755 4.02616   4
   9   0 -12 3.41243 3.67110   7
   8   0 -12 5.30395 3.60643   7
   8   0 -12 2.22941 4.22280   4
  -8   0  12 1.16018 1.38076   9
   7   0 -12 389.024 22.4348   4
  -7   0  12 365.526 19.1082   9
   6   0 -12 240.177 15.2044   4
  -6   0  12 216.808 13.8942   8
  -6   0  12 236.782 12.4389   5
   5   0 -12 342.684 19.2862   4
  -5   0  12 294.734 17.1755   5
  -5   0  12 330.829 16.5426   5
   4   0 -12 117.719 8.97209   7
   4   0 -12 110.825 8.62617   4
  -4   0  12 96.9407 6.67972   5
   3   0 -12 767.084 39.7757   7
   3   0 -12 768.730 39.3501   4
  -3   0  12 733.135 37.1791   5
  -2   0  12 248.185 13.1385   5
   2   0 -12 254.485 15.3669   7
   2   0 -12 246.375 14.7305   4
   1   0 -12 44.7257 5.46679   7
  -1   0  12 38.5513 3.56696   5
   0   0  12 498.987 26.5636   5
   0   0 -12 533.309 28.0276   7
   1   0  12 411.269 22.7526   5
  -1   0 -12 427.699 23.4125   7
  -1   0 -12 436.757 22.1345   5
  -2   0 -12 12.4958 3.37712  10
   3   0  12 101.939 8.34421   5
  -4   0 -12 25.8934 4.66514  10
   4   0  12 14.9900 2.24400   2
   5   0  12 39.2343 3.41393   2
  -5   0 -12 38.2677 5.77929  10
  -6   0 -12 18.6978 4.82815  10
  -6   0 -12 11.5374 3.79550   3
  -7   0 -12 158.430 10.9871   3
  -7   0 -12 152.631 11.6888  10
  -8   0 -12 116.123 9.47297  10
  -8   0 -12 119.683 8.82045   3
  -9   0 -12 44.9605 5.33912  10
  -9   0 -12 47.6344 5.09149   3
  12  -1 -12 -0.3256 2.45382   4
  12   1 -12 0.90154 2.99987   4
 -11  -1  12 0.19713 1.33075   9
  11  -1 -12 4.76653 3.60723   4
  11   1 -12 7.34739 3.10653   7
  11   1 -12 3.69094 3.65411   4
 -10  -1  12 1.19875 1.51570   9
  10  -1 -12 2.24268 3.61475   4
  10  -1 -12 5.43176 3.03494   7
  10   1 -12 2.25100 3.26792   7
  10   1 -12 2.81501 4.16811   4
  -9  -1  12 14.0996 2.12303   9
   9  -1 -12 15.5280 5.16430   4
   9  -1 -12 13.9163 3.78196   7
   9   1 -12 15.9117 5.16303   4
   8  -1 -12 83.2972 8.59285   4
   8  -1 -12 70.9259 7.55341   7
  -8  -1  12 66.1559 4.58226   9
   8   1 -12 65.2123 8.08895   4
   7  -1 -12 -1.6933 2.70984   7
  -7  -1  12 2.83846 1.37057   9
   7  -1 -12 -0.6043 3.85069   4
   7   1 -12 0.26198 3.85356   4
   6  -1 -12 14.0403 4.68586   4
  -6  -1  12 15.8572 1.99136   9
  -6  -1  12 12.3505 2.11432   2
   6  -1 -12 20.2568 4.67619   7
   6   1 -12 15.0621 4.67641   4
  -6   1  12 18.4363 3.77096   8
  -6   1  12 21.2472 2.95012   5
   5  -1 -12 40.2401 6.00194   7
   5  -1 -12 41.8692 6.30415   4
  -5  -1  12 41.0544 3.08331   9
   5   1 -12 50.5977 6.23158   4
  -5   1  12 48.1461 3.96960   5
  -5   1  12 48.0757 5.55379   8
   4  -1 -12 86.5960 7.67467   4
   4  -1 -12 85.8381 7.75767   7
   4   1 -12 71.3790 7.24113   4
  -4   1  12 83.5695 5.55470   5
  -4   1  12 84.6989 6.94541   8
   3  -1 -12 0.62006 2.80364   7
   3  -1 -12 -1.2331 2.50748   4
   3   1 -12 -3.8381 1.85100   4
  -3   1  12 0.75587 1.33509   5
   2  -1 -12 63.4314 6.39236   7
   2  -1 -12 64.6839 6.10004   4
   2   1 -12 58.2412 6.10533   7
   2   1 -12 57.2985 5.46652   4
  -2   1  12 57.2884 4.64542   5
   1  -1 -12 39.8073 5.61291   7
  -1   1  12 30.0404 3.61253   5
   1   1 -12 34.2561 4.97734   7
   1   1 -12 34.0997 3.92163   4
   0  -1 -12 13.7108 3.64825   7
   0  -1  12 13.2899 2.14219   5
   0   1  12 13.7729 2.78312   5
   0   1 -12 18.8899 3.73326   7
   1  -1  12 6.88169 2.01082   5
  -1  -1 -12 14.3908 3.01503  10
  -1  -1 -12 16.6929 3.79298   7
  -1   1 -12 10.1117 1.80371   5
  -1   1 -12 15.4972 3.15742   7
   1   1  12 15.0985 3.02812   5
   2  -1  12 546.576 28.6670   2
  -2  -1 -12 593.112 29.8287  10
  -2   1 -12 545.997 29.5683   7
  -2   1 -12 607.534 30.0776  10
   2   1  12 518.121 29.8859   5
  -3  -1 -12 26.7335 6.99667  10
   3  -1  12 26.1183 3.23186   2
   3   1  12 19.1614 3.85431   5
  -3   1 -12 31.4902 4.83874  10
   4  -1  12 123.277 7.45278   2
  -4  -1 -12 131.029 9.56433  10
   4   1  12 111.743 7.12668   2
   4   1  12 119.811 10.6892   5
  -4   1 -12 129.719 9.68757  10
  -5  -1 -12 288.131 17.2982  10
  -5  -1 -12 288.829 16.4936   3
   5  -1  12 259.687 14.7144   2
  -5   1 -12 295.294 17.5844  10
  -6  -1 -12 12.3593 4.28053  10
  -6  -1 -12 21.2768 4.33727   3
  -6   1 -12 22.8259 5.06591  10
  -6   1 -12 12.9182 4.07312   3
  -7  -1 -12 31.3535 5.27949  10
  -7  -1 -12 18.1252 3.81643   3
  -7   1 -12 18.1771 4.61952  10
  -7   1 -12 23.8975 4.58069   3
  -8  -1 -12 25.4918 3.89621   3
  -8  -1 -12 28.8390 4.77739  10
  -8   1 -12 28.8261 4.71158  10
  -8   1 -12 26.9499 4.35399   3
  -9  -1 -12 -0.5705 2.18224   3
   9  -1  12 0.56548 2.42098   6
  -9   1 -12 -0.3151 2.29484  10
  -9   1 -12 -2.7405 2.44554   3
 -12  -2  12 2.46692 1.86917   9
  12   2 -12 0.96166 3.29058   4
  11  -2 -12 5.14593 2.96104   4
 -11  -2  12 2.98840 1.63318   9
  11   2 -12 8.38140 3.91321   4
  11   2 -12 0.01704 2.93844   7
 -10  -2  12 17.1796 2.62146   9
  10  -2 -12 18.4533 4.72367   4
  10   2 -12 18.3508 5.37466   4
  -9  -2  12 61.6732 4.43474   9
   9  -2 -12 52.7882 6.47191   7
   9  -2 -12 53.4467 7.47027   4
   9   2 -12 55.9409 7.80217   4
   8  -2 -12 43.0767 5.97848   7
  -8  -2  12 33.0733 3.84567   9
   8  -2 -12 39.8874 6.61011   4
   8   2 -12 56.4015 7.61481   4
   7  -2 -12 66.6280 8.16595   4
  -7  -2  12 70.9806 4.55893   9
   7  -2 -12 67.5195 7.01098   7
  -7   2  12 50.5244 5.31596   5
   7   2 -12 78.3959 8.22151   4
  -6  -2  12 67.5660 4.78714   2
   6  -2 -12 82.1460 7.96472   4
  -6  -2  12 72.4148 4.72277   9
   6  -2 -12 75.5676 7.43942   7
  -6   2  12 75.9239 5.76691   5
   6   2 -12 78.2753 7.80912   4
  -6   2  12 56.0858 7.51812   8
   5  -2 -12 66.9121 7.36480   7
   5  -2 -12 83.5026 7.95093   4
  -5  -2  12 79.6187 5.33004   2
  -5  -2  12 81.8313 4.81570   9
  -5   2  12 73.3866 5.80236   5
  -5   2  12 81.0945 6.96658   8
   5   2 -12 79.6138 7.61774   4
   4  -2 -12 101.367 8.70462   4
   4  -2 -12 104.319 12.3985   7
  -4  -2  12 101.832 5.79137   9
  -4  -2  12 109.069 6.63604   2
  -4   2  12 99.7127 6.84273   5
  -4   2  12 101.320 8.07331   8
   4   2 -12 96.2323 8.26793   4
   3  -2 -12 305.314 17.7881   4
  -3  -2  12 305.659 15.8986   2
  -3  -2  12 276.232 15.1904   9
   3  -2 -12 318.434 18.2309   7
  -3   2  12 299.805 17.0296   8
   3   2 -12 287.932 17.0234   4
  -3   2  12 291.188 16.1105   5
  -2  -2  12 572.184 29.4746   9
   2  -2 -12 638.568 32.7502   7
  -2   2  12 620.358 30.8622   5
   2   2 -12 577.468 31.1279   4
  -1  -2  12 775.849 39.1533   9
  -1  -2  12 838.713 40.1278   2
   1  -2 -12 825.635 42.1112   7
  -1   2  12 820.488 40.7235   5
   1   2 -12 741.367 40.3595   4
   1   2 -12 814.118 41.6079   7
   0  -2 -12 327.585 17.3915  10
   0  -2 -12 321.784 18.7607   7
   0  -2  12 305.452 16.0059   9
   0  -2  12 330.948 16.9493   2
   0   2  12 316.610 17.7941   5
   0   2 -12 310.468 18.1246   7
  -1  -2 -12 751.293 37.5323  10
   1   2  12 730.053 38.0559   5
  -1   2 -12 705.739 37.7549   7
  -1   2 -12 742.917 36.3129   5
   2  -2  12 396.121 20.6196   2
  -2  -2 -12 409.484 21.7803  10
  -2   2 -12 423.165 22.2446  10
   2   2  12 376.435 22.2166   5
  -2   2 -12 380.564 21.2617   7
   3  -2  12 147.151 8.94647   2
  -3   2 -12 160.249 10.9542  10
   3   2  12 145.464 13.4559   5
  -4  -2 -12 81.3667 6.57727   3
  -4  -2 -12 77.7875 7.67246  10
   4  -2  12 78.9303 5.73852   2
  -4   2 -12 91.7304 8.07637  10
   5  -2  12 231.045 13.4531   2
  -5  -2 -12 238.558 14.7119   3
  -5  -2 -12 278.589 16.0644  10
  -5   2 -12 263.580 16.0632  10
  -6  -2 -12 220.046 13.6154   3
  -6  -2 -12 214.941 15.9956  10
  -6   2 -12 251.625 14.7599   3
  -6   2 -12 222.283 17.5755  10
   7  -2  12 53.0871 6.71712   6
  -7  -2 -12 65.8974 5.87215   3
  -7  -2 -12 62.4986 7.13893  10
  -7   2 -12 61.1538 7.09177   3
  -7   2 -12 58.8859 7.16245  10
  -8  -2 -12 7.56171 2.68313   3
  -8  -2 -12 3.99575 3.32432  10
   8  -2  12 -1.4520 2.90893   6
  -8   2 -12 0.09890 2.93400  10
  -8   2 -12 5.01219 3.07210   3
   9  -2  12 0.26989 2.22847   6
  -9  -2 -12 3.17531 1.31375   9
  -9  -2 -12 7.00548 2.18929   3
  -9   2 -12 1.78754 2.37334   3
  -9   2 -12 1.05223 2.25834  10
 -12  -3  12 16.7068 1.96429   9
  12   3 -12 18.6988 3.57171   4
 -11  -3  12 -0.8611 1.35342   9
  11   3 -12 2.99441 3.28572   4
 -10  -3  12 21.8426 2.54396   9
  10   3 -12 23.9211 6.56637   4
   9  -3 -12 -0.4196 3.45865   4
  -9  -3  12 3.08559 1.86037   9
   9   3 -12 5.99211 4.44978   4
   8  -3 -12 2.99544 3.97342   4
  -8  -3  12 -1.3635 1.64923   9
   8   3 -12 1.99839 3.97116   4
   7  -3 -12 -1.2099 3.74733   4
  -7  -3  12 1.40674 1.58333   9
   7  -3 -12 1.78322 2.92266   7
   7   3 -12 8.04607 6.57270   4
   6  -3 -12 0.45857 3.70910   4
   6  -3 -12 -0.3653 2.92633   7
   6  -3 -12 -2.9407 2.75263   6
  -6  -3  12 1.78356 1.59187   9
  -6  -3  12 6.19817 2.78056   2
   6   3 -12 0.30091 3.71135   4
  -6   3  12 1.69273 1.94843   5
   5  -3 -12 220.832 12.3494   6
   5  -3 -12 214.408 14.1204   7
  -5  -3  12 215.254 12.4166   2
   5  -3 -12 230.500 14.9321   4
  -5  -3  12 222.784 11.6183   9
  -5   3  12 210.774 13.7115   8
  -5   3  12 209.617 12.8093   5
   5   3 -12 224.614 14.2174   4
   4  -3 -12 -1.6458 1.78706   6
  -4  -3  12 3.04887 1.43453   9
   4  -3 -12 -0.3661 2.89089   7
  -4   3  12 0.29253 1.64654   5
   4   3 -12 -0.2211 2.53015   4
  -4   3  12 6.15550 2.72748   8
   3  -3 -12 308.792 16.2364   6
   3  -3 -12 304.180 18.9606   7
  -3  -3  12 293.567 15.3029   9
  -3   3  12 292.657 16.6266   5
  -3   3  12 298.692 17.2722   8
   3   3 -12 305.331 17.2076   4
   2  -3 -12 38.1755 3.92926   6
  -2  -3  12 37.7762 2.93668   9
   2  -3 -12 31.5307 3.35772  10
   2   3 -12 47.2122 4.53483   4
  -2   3  12 44.0546 4.51615   5
  -1  -3  12 -0.3535 1.04979   9
   1  -3 -12 -2.5789 1.35081  10
   1  -3 -12 3.88114 3.16066   7
  -1  -3  12 -0.2520 1.87655   2
   1  -3 -12 1.08183 1.80170   6
   1   3 -12 4.34990 2.39205   7
  -1   3  12 1.28137 2.00191   5
   0  -3 -12 400.494 22.9188  10
   0  -3  12 446.354 22.1224   2
   0  -3  12 434.869 21.2647   9
   0   3 -12 416.245 23.0760   7
   0   3  12 418.649 23.1270   5
   1  -3  12 252.340 13.2519   2
   1  -3  12 215.125 12.9775   6
   1  -3  12 251.653 12.4266   9
  -1  -3 -12 246.049 13.5794  10
   1   3  12 231.232 14.5802   5
  -1   3 -12 222.086 13.8063   7
   2  -3  12 21.4806 3.08592   2
  -2  -3 -12 21.0214 3.53620  10
   2  -3  12 24.8951 3.36745   6
   2   3  12 17.2166 3.93251   5
   3  -3  12 39.2026 4.75198   6
  -3  -3 -12 45.9988 5.37457  10
   3  -3  12 43.1013 4.35098   2
  -3   3 -12 34.8410 5.28075  10
   4  -3  12 2.28943 2.17113   2
  -4  -3 -12 -0.5973 2.64301  10
  -4  -3 -12 5.21475 2.57809   3
   4  -3  12 -1.8945 2.40937   6
  -4   3 -12 0.88520 3.04893  10
   5  -3  12 2.43062 2.19548   2
  -5  -3 -12 2.53925 2.40917   3
   5  -3  12 -0.5326 3.03447   6
  -5  -3 -12 5.78541 3.68659  10
  -5   3 -12 2.64586 3.54532  10
  -6  -3 -12 -0.1898 2.94013  10
   6  -3  12 -1.5835 2.94531   6
  -6  -3 -12 -6.4091 2.40288   3
  -6   3 -12 -1.2565 3.06021  10
   7  -3  12 14.9044 3.91967   6
  -7  -3 -12 12.1587 3.38712  10
  -7   3 -12 16.7603 4.18911   3
  -7   3 -12 8.43193 3.42359  10
   8  -3  12 7.10940 2.93111   6
  -8  -3 -12 2.92789 1.48660   9
  -8   3 -12 2.31497 2.93341   3
  -8   3 -12 5.28685 3.03699  10
   9  -3  12 -0.2377 3.00519   6
  -9   3 -12 1.69634 1.95070  10
  -9   3 -12 -4.9601 2.00154   3
 -11  -4  12 1.05925 1.63206   9
  11   4 -12 7.20098 3.43858   4
 -10  -4  12 0.95578 1.55839   9
  10   4 -12 -0.4973 3.55340   4
  -9  -4  12 1.98328 1.89064   9
   9   4 -12 0.44539 3.81019   4
  -8  -4  12 18.6405 2.70300   9
   8   4 -12 18.1400 5.41586   4
   7  -4 -12 6.30833 2.33135   6
  -7  -4  12 6.79236 1.97977   9
   7  -4 -12 9.57495 3.42413   7
   7   4 -12 7.64322 4.65557   4
  -6  -4  12 63.2209 4.69008   2
  -6  -4  12 66.4220 4.79411   9
   6  -4 -12 60.4686 5.48646   6
   6  -4 -12 56.4997 6.39062   7
   6   4 -12 68.1532 7.74757   4
   5  -4 -12 67.5021 5.77743   6
  -5  -4  12 71.8325 4.90950   9
   5  -4 -12 70.6112 7.02803   7
  -5  -4  12 69.4958 5.11586   2
   5   4 -12 66.2863 7.29886   4
   4  -4 -12 248.072 15.5201   7
   4  -4 -12 254.860 15.0075   6
  -4  -4  12 253.308 12.9790   9
  -4  -4  12 248.973 13.5008   2
  -4   4  12 242.017 14.9285   8
  -4   4  12 205.374 14.7921   5
   4   4 -12 266.243 15.3219   4
  -3  -4  12 36.5352 3.29745   9
   3  -4 -12 46.9952 6.38934   7
  -3  -4  12 40.3155 4.22702   2
   3  -4 -12 42.3334 4.44480   6
   3   4 -12 39.5720 4.89344   4
  -3   4  12 36.6727 4.59307   5
  -3   4  12 31.7793 4.57612   8
  -2  -4  12 35.1265 3.99408   2
  -2  -4  12 24.6194 2.87086   9
   2  -4 -12 32.3643 4.17399   6
   2   4 -12 37.2934 4.48830   4
  -2   4  12 25.2375 3.89462   5
  -1  -4  12 245.441 13.1666   2
   1  -4 -12 234.272 16.4278   6
  -1  -4  12 218.371 12.0172   9
   1   4 -12 225.089 14.1230   7
  -1   4  12 224.857 13.8559   5
   0  -4 -12 315.643 16.8345   6
   0  -4  12 299.311 15.4792   9
   0  -4  12 304.076 16.4731   2
   0   4  12 292.476 17.5200   5
   0   4 -12 289.683 17.0354   7
   1  -4  12 330.038 16.2071   9
   1  -4  12 332.234 17.1197   2
   1  -4  12 304.170 16.8607   6
  -1  -4 -12 315.585 16.9129  10
   1   4  12 303.074 18.4171   5
  -1   4 -12 296.652 17.3408   7
   2  -4  12 248.359 14.3861   6
  -2  -4 -12 258.075 14.6925  10
   2  -4  12 258.042 14.3697   2
   3  -4  12 16.2818 3.30440   6
  -3  -4 -12 18.1948 3.37044  10
   3  -4  12 21.4728 3.51074   2
  -3   4 -12 20.6071 4.34260  10
   4  -4  12 13.2065 3.41455   6
   4  -4  12 26.7036 4.48649   2
  -4  -4 -12 15.7000 3.50319  10
  -4   4 -12 16.5333 4.21300  10
   5  -4  12 1.24841 2.86954   6
  -5  -4 -12 3.66071 3.17929  10
   5  -4  12 5.17034 2.14092   2
  -5   4 -12 2.56565 3.59160  10
   6  -4  12 62.3305 4.77418   2
   6  -4  12 53.4250 6.57938   6
  -6   4 -12 68.6009 7.25530   3
  -6   4 -12 67.1992 7.08609  10
   7  -4  12 45.8016 5.92647   6
  -7   4 -12 51.9745 6.02679  10
  -7   4 -12 56.8580 6.64898   3
   8  -4  12 11.5755 2.97592   6
  -8   4 -12 14.7451 3.02040  10
  -8   4 -12 14.6701 3.58631   3
 -11  -5  12 2.58029 1.11491   9
  11   5 -12 1.76532 2.65689   4
 -10  -5  12 10.4313 1.92761   9
  10   5 -12 6.10163 3.46931   4
  -9  -5  12 11.8133 2.21654   9
   9   5 -12 12.3130 5.87353   4
  -8  -5  12 9.73648 2.25206   9
   8  -5 -12 10.0199 2.65277   6
   8   5 -12 8.23329 4.88798   4
   7  -5 -12 0.35368 2.27076   6
  -7  -5  12 -0.9273 1.75847   9
   7   5 -12 4.10619 4.09912   4
  -6  -5  12 5.02582 1.96141   2
   6  -5 -12 3.50824 2.44143   6
  -6  -5  12 5.39432 2.24645   9
   6   5 -12 4.41477 3.87656   4
  -5  -5  12 44.7190 4.12150   9
   5  -5 -12 41.1367 5.06172   6
  -5  -5  12 48.4032 4.33306   2
   5   5 -12 44.3449 6.25436   4
  -4  -5  12 38.1747 3.70405   9
  -4  -5  12 36.0126 4.35267   2
   4  -5 -12 34.3390 4.54450   6
   4   5 -12 39.2261 5.57740   4
  -3  -5  12 45.5469 4.96568   2
  -3  -5  12 45.5258 3.97751   9
   3  -5 -12 50.2567 5.27847   6
   3   5 -12 53.9816 5.59269   4
  -2  -5  12 5.61568 1.88469   9
  -2  -5  12 6.85079 2.74665   2
   2  -5 -12 6.78376 2.77794   6
   2   5 -12 8.66822 2.98343   4
  -1  -5  12 35.4214 3.57270   9
   1  -5 -12 45.3486 4.98793   6
  -1  -5  12 37.7671 4.79647   2
   0  -5  12 -1.4067 1.64711   9
   0  -5 -12 4.59866 2.68274   6
   0  -5  12 1.50464 2.54862   2
   0   5 -12 -1.8945 2.23368   7
   1  -5  12 48.7219 5.15898   2
   1  -5  12 36.4537 4.60016   6
   1  -5  12 43.0295 3.87721   9
   2  -5  12 74.2530 6.40893   2
   2  -5  12 81.6133 6.34852   6
  -2   5 -12 83.5695 7.55507  10
   3  -5  12 2.24202 2.60397   2
   3  -5  12 4.53159 2.70827   6
  -3   5 -12 4.15100 3.43205  10
   4  -5  12 44.7152 5.52561   6
  -4   5 -12 44.6194 6.19167  10
   5  -5  12 2.22428 2.25844   2
   5  -5  12 -5.4654 2.20723   6
  -5   5 -12 3.93969 3.01515  10
   6  -5  12 15.6400 2.58589   2
   6  -5  12 12.9606 4.19699   6
  -6   5 -12 9.32343 3.34188  10
  -6   5 -12 22.1634 4.65133   3
   7  -5  12 1.50663 2.83059   6
  -7   5 -12 3.96745 2.31517  10
  -7   5 -12 5.42457 3.27624   3
   8  -5  12 4.44787 3.82852   6
  -8   5 -12 -1.0424 1.88098   3
  10   6 -12 25.5810 4.42744   4
  -9  -6  12 13.8933 2.15211   9
   9   6 -12 10.5349 3.77205   4
   8  -6 -12 23.3456 3.36098   6
   8   6 -12 18.2610 6.68986   4
   7  -6 -12 74.2030 6.53639   6
  -7  -6  12 80.6955 5.72738   9
   7   6 -12 77.0179 8.30249   4
  -6  -6  12 192.993 10.7933   9
   6  -6 -12 183.344 11.9271   6
   6   6 -12 195.276 13.2333   4
   5  -6 -12 293.023 16.7719   6
  -5  -6  12 262.502 15.4661   2
  -5  -6  12 299.013 15.3951   9
   5   6 -12 300.195 17.5986   4
  -4  -6  12 150.885 10.9231   2
  -4  -6  12 145.022 8.56087   9
   4   6 -12 135.144 10.1192   4
  -3  -6  12 35.8333 3.99672   9
  -3  -6  12 45.7153 5.11683   2
   3  -6 -12 33.8550 4.96073   6
   3   6 -12 37.9226 5.03913   4
  -2  -6  12 27.8723 3.26929   9
  -2  -6  12 24.5510 3.95745   2
   2  -6 -12 21.4700 4.08820   6
  -1  -6  12 5.45333 2.83289   2
   1  -6 -12 3.31395 3.09494   6
  -1  -6  12 4.87316 1.99895   9
   1   6 -12 3.98262 2.67303   7
   0  -6  12 41.7088 4.05881   9
   0  -6 -12 36.5239 4.97007   6
   1  -6  12 13.0745 2.43344   9
   1  -6  12 14.4953 3.45880   2
   2  -6  12 25.8269 4.01006   2
   2  -6  12 21.0023 3.51072   6
  -2   6 -12 35.1761 5.05949  10
   3  -6  12 146.521 9.63357   6
   3  -6  12 135.327 9.29519   2
  -3   6 -12 140.774 10.0943  10
   4  -6  12 55.3989 5.58200   2
   4  -6  12 62.6561 5.98109   6
  -4   6 -12 71.1690 6.62776  10
   5  -6  12 30.2948 3.70490   2
   5  -6  12 27.5784 4.27637   6
  -5   6 -12 44.3016 4.98663  10
   6  -6  12 5.35205 2.29924   6
   6  -6  12 5.06748 1.74375   2
  -6   6 -12 2.52301 3.19168   3
  -6   6 -12 9.27834 2.43667  10
   7  -6  12 5.38189 2.23749   6
  -7   6 -12 10.8305 3.05167   3
  -7   6 -12 2.12452 3.29411  10
  -9  -7  12 2.79154 1.61957   9
   9   7 -12 3.93052 2.66985   4
  -8  -7  12 1.32205 1.83925   9
   8  -7 -12 6.24153 2.19459   6
   8   7 -12 6.27271 3.55243   4
   7  -7 -12 16.3725 3.52247   6
  -7  -7  12 18.6791 2.87962   9
   7   7 -12 16.9935 3.98857   4
   6  -7 -12 2.70913 2.79736   6
  -6  -7  12 3.17925 2.27407   9
   6   7 -12 6.51708 3.61001   4
  -5  -7  12 10.4750 2.45361   9
  -5  -7  12 9.97250 2.37513   2
   5  -7 -12 12.6013 3.65075   6
   5   7 -12 10.1556 3.90172   4
  -4  -7  12 -1.2819 1.90470   9
   4  -7 -12 -2.0019 2.54521   6
  -4  -7  12 1.18623 2.38432   2
   4   7 -12 -3.1317 2.82772   4
  -3  -7  12 36.7264 4.69372   2
   3  -7 -12 26.6073 4.60085   6
  -3  -7  12 39.0135 3.94064   9
  -2  -7  12 3.39909 2.82955   2
  -2  -7  12 0.94446 1.94953   9
   2  -7 -12 1.20250 2.77537   6
  -1  -7  12 12.6615 3.61546   2
  -1  -7  12 7.56944 2.34015   9
   1  -7 -12 9.37379 3.55477   6
   0  -7  12 2.83869 2.80387   2
   0  -7 -12 2.26066 2.96467   6
   0  -7  12 0.51350 2.16010   9
   1  -7  12 5.83336 2.34716   9
   1  -7  12 4.71800 2.96787   2
   2  -7  12 14.1986 2.77961   6
   2  -7  12 17.8858 3.69053   2
  -2   7 -12 14.4854 3.20639  10
   3  -7  12 -1.8632 2.51156   6
   3  -7  12 2.22061 2.93181   2
  -3   7 -12 5.18256 2.74082  10
   4  -7  12 2.20152 3.05593   2
   4  -7  12 8.10603 2.97817   6
  -4   7 -12 3.60763 2.33816  10
   5  -7  12 17.9644 2.58418   2
   5  -7  12 16.8720 3.11739   6
  -5   7 -12 18.4121 3.16045  10
  -5   7 -12 17.2770 3.44955   3
   6  -7  12 6.14379 1.79827   2
   6  -7  12 7.29550 4.37274   6
  -6   7 -12 1.41417 2.15781   3
   8  -8 -12 3.16731 1.73431   6
  -8  -8  12 2.82964 1.56861   9
   8   8 -12 -0.2779 2.11030   4
  -7  -8  12 8.06473 1.88639   9
   7  -8 -12 13.0723 2.61972   6
   7   8 -12 10.3128 3.14897   4
  -6  -8  12 4.84343 2.10717   9
   6  -8 -12 3.01824 2.40245   6
   6   8 -12 0.11869 2.86327   4
  -5  -8  12 31.6015 4.94833   9
  -5  -8  12 20.4173 2.67782   2
   5  -8 -12 25.7838 5.69947   6
   5   8 -12 17.4556 3.75216   4
   4  -8 -12 177.178 11.6099   6
  -4  -8  12 169.908 10.4898   2
  -4  -8  12 181.853 10.1539   9
  -3  -8  12 17.1110 3.42502   2
  -3  -8  12 11.2772 2.54195   9
   3  -8 -12 16.5073 4.01054   6
  -2  -8  12 138.888 9.39906   2
  -2  -8  12 139.825 8.38122   9
   2  -8 -12 133.256 9.89276   6
   1  -8 -12 54.2422 6.44705   6
  -1  -8  12 52.8519 5.79022   2
  -1  -8  12 48.8009 4.74347   9
   0  -8  12 71.5511 6.38172   2
   0  -8  12 70.1591 5.43480   9
   0  -8 -12 66.7863 6.76287   6
   1  -8  12 152.404 8.93990   9
   1  -8  12 159.794 10.1993   2
  -1   8 -12 148.769 9.97490  10
   2  -8  12 240.982 13.4261   2
  -2   8 -12 212.302 13.0994  10
   3  -8  12 55.7685 5.51631   2
   3  -8  12 71.5184 7.50836   6
   4  -8  12 11.0179 2.59688   6
   4  -8  12 10.0358 2.37890   2
   5  -8  12 51.1557 5.72025   2
   5  -8  12 56.8536 4.78760   6
   7  -9 -12 3.50007 1.63159   6
  -7  -9  12 2.04470 1.35631   9
   7   9 -12 0.77627 3.17247   4
  -6  -9  12 1.49283 1.43440   9
   6  -9 -12 0.58637 3.25823   6
   5  -9 -12 2.04093 2.24096   6
  -5  -9  12 -2.0536 1.44580   9
   4  -9 -12 11.9996 2.86862   6
  -4  -9  12 13.4992 2.62924   2
  -4  -9  12 12.1965 2.10260   9
  -3  -9  12 16.7810 3.04505   2
  -3  -9  12 11.2378 2.41059   9
   3  -9 -12 13.1112 3.15026   6
  -2  -9  12 3.49459 2.41019   2
   2  -9 -12 -2.1427 2.47480   6
  -2  -9  12 4.34899 1.98077   9
  -1  -9  12 -0.6965 2.51862   2
   1  -9 -12 -1.0100 2.23029   6
  -1  -9  12 -0.3374 1.68416   9
   0  -9  12 0.61362 2.57190   2
   0  -9 -12 0.05941 2.44221   6
   0  -9  12 0.01200 1.82301   9
   1  -9  12 6.25076 2.87139   2
   2  -9  12 1.67856 2.34192   2
   3  -9  12 7.24736 2.14638   2
  -3   9 -12 11.2471 2.28504   3
   4  -9  12 14.4604 2.26762   2
  -4   9 -12 17.9360 3.35857   3
  -4 -10  12 27.0599 2.98623   2
   4 -10 -12 39.2209 4.31383   6
  -4 -10  12 35.8592 3.09243   9
  -3 -10  12 3.12222 1.42665   9
  -3 -10  12 -0.1226 1.93569   2
   3 -10 -12 3.13598 2.09790   6
  -2 -10  12 1.49527 1.33803   9
   2 -10 -12 3.58970 2.03514   6
  -2 -10  12 0.84847 1.91486   2
  -1 -10  12 1.94648 1.53498   9
   1 -10 -12 3.07517 2.14123   6
  -1 -10  12 4.13352 2.25479   2
   0 -10  12 43.4240 4.43328   2
   1 -10  12 9.92764 2.43055   2
   2 -10  12 27.6483 3.27702   2
  12   0 -13 3.65235 2.91615   4
  11   0 -13 -2.7652 2.99714   4
  11   0 -13 -0.6245 3.07716   7
  10   0 -13 2.16949 2.97151   7
  10   0 -13 4.14733 3.97365   4
   9   0 -13 -4.8313 3.41611   4
   9   0 -13 -0.8201 3.26702   7
   8   0 -13 4.75400 3.80499   7
   8   0 -13 -0.3524 3.78001   4
   7   0 -13 -5.6157 3.15701   4
   7   0 -13 -1.7519 3.28563   7
   6   0 -13 1.69414 3.60637   4
   6   0 -13 1.25381 3.49622   7
   5   0 -13 -5.8950 2.70386   7
   5   0 -13 1.85626 3.31894   4
  -5   0  13 1.63855 1.02981   5
  -4   0  13 0.47085 0.98735   5
   4   0 -13 2.25190 3.29838   4
  -4   0  13 -1.0856 1.43334   5
   4   0 -13 3.73015 3.21857   7
   3   0 -13 -1.7945 3.50225   7
   3   0 -13 -3.2438 2.49433   4
  -3   0  13 -0.4302 0.89301   5
   2   0 -13 3.75081 2.55019   4
   2   0 -13 0.77913 2.83816   7
  -2   0  13 -0.0276 1.02690   5
   1   0 -13 2.06034 2.89878   7
  -1   0  13 1.73856 1.31473   5
   0   0  13 3.11245 1.56343   5
   0   0 -13 2.29809 3.00731   7
   1   0  13 -1.3029 1.95218   5
  -1   0 -13 -3.6818 1.90080  10
  -1   0 -13 -2.8484 2.37957   7
   2   0  13 0.04950 1.86633   5
  -2   0 -13 -0.9357 2.50892  10
  -3   0 -13 0.97969 2.99285  10
   3   0  13 -3.9927 2.10516   5
   3   0  13 1.87413 1.54211   2
   4   0  13 -0.6825 1.38250   2
  -4   0 -13 -0.2277 3.13470  10
   5   0  13 0.51949 1.49333   2
  -5   0 -13 -1.3914 2.94563  10
  -6   0 -13 -0.2046 2.97630  10
  -6   0 -13 -0.6148 3.12799   3
  -7   0 -13 -2.0688 2.89844   3
  -7   0 -13 -1.1786 3.59140  10
  -8   0 -13 2.93455 2.64766   3
  -8   0 -13 -2.0635 2.89114  10
   9   0  13 1.65017 2.68856   6
  -9   0 -13 2.27786 2.82646   3
  12  -1 -13 2.11330 2.73046   4
  12   1 -13 -0.3641 3.70418   4
  11  -1 -13 11.7935 3.79578   4
  11   1 -13 11.2030 3.15707   7
  11   1 -13 13.8095 4.49687   4
  10  -1 -13 15.3223 4.84715   4
 -10  -1  13 15.5368 2.74549   9
  10  -1 -13 9.98189 7.13784   7
  10   1 -13 18.4710 4.49697   7
  10   1 -13 15.2160 4.60140   4
   9  -1 -13 55.9385 6.75275   7
  -9  -1  13 57.0704 4.18821   9
   9  -1 -13 70.1140 7.99850   4
   9   1 -13 69.5119 8.22472   4
   8  -1 -13 61.4869 8.05849   4
   8  -1 -13 52.1399 6.72727   7
  -8  -1  13 56.7560 4.00316   9
   8   1 -13 56.5527 8.06190   4
   7  -1 -13 20.1724 4.60894   7
   7  -1 -13 16.4005 5.37181   4
  -7  -1  13 18.1824 2.09509   9
   7   1 -13 18.3405 5.59216   4
   6  -1 -13 24.2978 5.09208   7
  -6  -1  13 27.6332 3.04485   2
   6  -1 -13 27.6946 5.91403   4
  -6  -1  13 32.9197 2.65997   9
  -6   1  13 35.3670 3.55887   5
   6   1 -13 39.7556 6.41693   4
  -6   1  13 35.4780 6.79141   8
   5  -1 -13 89.8262 8.30869   7
   5  -1 -13 76.0852 8.15065   4
  -5  -1  13 77.4670 5.45432   9
  -5   1  13 79.1565 5.51300   5
   5   1 -13 89.1241 7.96725   4
  -5   1  13 77.8003 8.78315   8
   4  -1 -13 130.703 9.75175   4
   4  -1 -13 123.032 9.77876   7
  -4   1  13 119.694 7.47900   5
   4   1 -13 121.744 9.44642   4
   3  -1 -13 41.1980 5.47836   4
   3   1 -13 39.8065 5.33674   4
  -3   1  13 44.2529 3.85018   5
   2  -1 -13 927.539 46.4500   7
   2   1 -13 916.430 46.2180   7
   2   1 -13 842.896 45.1024   4
  -2   1  13 863.762 44.2114   5
   1  -1 -13 301.033 17.6166   7
   1   1 -13 265.443 15.9092   4
  -1   1  13 280.918 15.7560   5
   1   1 -13 305.170 17.4602   7
   0  -1 -13 228.666 14.7392   7
   0   1  13 218.838 13.2041   5
   0   1 -13 234.697 14.2694   7
  -1  -1 -13 134.805 9.98393   7
  -1  -1 -13 137.793 9.36241  10
  -1   1 -13 132.853 9.51090   7
   1   1  13 132.885 9.34468   5
  -1   1 -13 139.784 8.02622   5
  -2  -1 -13 275.463 15.8289  10
   2  -1  13 275.513 14.4754   2
  -2   1 -13 286.862 16.8503  10
   2   1  13 230.740 15.6673   5
  -3  -1 -13 67.7033 6.80017  10
   3  -1  13 59.2259 4.85108   2
   3   1  13 57.1346 8.53603   5
  -3   1 -13 63.2637 6.81715  10
   4  -1  13 2.47021 1.69222   2
  -4  -1 -13 5.15875 3.53569  10
   4   1  13 4.58129 1.72043   2
  -4   1 -13 3.43266 3.49201  10
  -5  -1 -13 81.1114 8.03950  10
  -5  -1 -13 71.3761 9.93910   3
   5  -1  13 70.5279 5.09894   2
  -5   1 -13 82.5046 8.16732  10
  -6  -1 -13 43.0780 5.67923   3
  -6  -1 -13 48.0937 6.51763  10
  -6   1 -13 35.4623 5.44200   3
  -6   1 -13 34.0507 5.48784  10
  -7  -1 -13 56.2292 6.99135  10
  -7  -1 -13 52.3027 5.88435   3
  -7   1 -13 49.2785 6.30417   3
  -7   1 -13 57.8814 6.94284  10
   8  -1  13 66.0480 6.34153   6
  -8  -1 -13 55.0552 5.49235   3
  -8  -1 -13 52.5444 7.44623  10
  -8   1 -13 60.5978 6.21057   3
  -8   1 -13 47.2838 7.77103  10
  -9  -1 -13 34.8785 3.79109   3
   9  -1  13 35.2126 4.50673   6
  -9   1 -13 26.0348 3.63959  10
  -9   1 -13 37.9298 5.28929   3
  12   2 -13 2.63750 2.70991   4
  12   2 -13 -1.3168 3.15601   7
 -11  -2  13 5.10989 1.71998   9
  11   2 -13 5.43363 3.42906   7
  11   2 -13 7.58571 3.86531   4
 -10  -2  13 1.72321 1.40828   9
  10  -2 -13 4.45945 4.36707   4
  10   2 -13 -1.5987 3.41532   4
   9  -2 -13 2.25579 4.09381   4
  -9  -2  13 7.42546 1.87450   9
   9  -2 -13 11.3981 3.75034   7
   9   2 -13 1.91438 4.26156   4
   8  -2 -13 9.44650 3.59749   7
  -8  -2  13 13.0774 2.11991   9
   8  -2 -13 6.42474 4.22848   4
   8   2 -13 7.29404 4.69828   4
   7  -2 -13 15.8912 4.98804   4
   7  -2 -13 14.6111 4.28380   7
  -7  -2  13 13.7445 2.05542   9
   7   2 -13 18.4451 5.11876   4
  -6  -2  13 90.4803 5.48777   9
  -6  -2  13 94.3061 5.78165   2
   6  -2 -13 89.7363 8.95806   4
   6  -2 -13 85.6732 8.40787   7
   6   2 -13 103.403 9.13353   4
  -6   2  13 81.4938 6.42554   5
  -5  -2  13 13.8455 2.44502   2
   5  -2 -13 18.3942 5.00356   4
   5  -2 -13 25.7294 5.08891   7
  -5  -2  13 20.3685 2.19982   9
  -5   2  13 26.0098 4.47796   8
  -5   2  13 13.3136 2.51992   5
   5   2 -13 21.4889 5.03934   4
   4  -2 -13 -0.0960 3.48094   4
  -4  -2  13 0.81258 1.09923   9
  -4  -2  13 -0.8909 1.57729   2
   4  -2 -13 4.55498 3.45928   7
  -4   2  13 2.58876 1.71410   5
  -4   2  13 2.39882 2.56823   8
   4   2 -13 -0.1308 2.94714   4
   3  -2 -13 17.3948 4.59090   7
  -3  -2  13 13.9503 1.55066   9
  -3  -2  13 11.4737 2.89204   2
   3   2 -13 12.9452 3.28204   4
  -3   2  13 13.4125 2.54372   5
  -2  -2  13 2.37575 2.07862   2
   2  -2 -13 -0.4303 3.01806   7
  -2  -2  13 0.68348 1.01486   9
   2   2 -13 2.03768 2.95223   7
   2   2 -13 7.94900 2.59009   4
  -2   2  13 1.27477 1.77844   5
   1  -2 -13 173.301 10.2904  10
  -1  -2  13 168.391 9.09099   9
  -1  -2  13 172.498 10.1790   2
   1  -2 -13 180.042 12.1603   7
   1   2 -13 179.547 11.1274   4
   1   2 -13 180.922 11.7377   7
  -1   2  13 165.223 13.2143   5
   0  -2  13 7.58406 2.36939   2
   0  -2 -13 6.69578 3.39918   7
   0  -2 -13 7.54191 2.21985  10
   0   2  13 2.71685 1.97059   5
   0   2 -13 1.41566 2.87671   7
   1  -2  13 14.8078 2.71778   2
  -1  -2 -13 17.6283 3.25282  10
  -1   2 -13 18.7290 3.39843   7
   1   2  13 9.40876 2.91287   5
   2  -2  13 72.5829 5.51352   2
  -2  -2 -13 67.7088 6.33943  10
   2   2  13 65.4769 6.58789   5
  -2   2 -13 77.0847 6.99298  10
  -2   2 -13 66.8627 5.88189   7
  -3  -2 -13 0.73110 2.84261  10
   3  -2  13 -1.2886 1.71464   2
   3   2  13 2.80310 3.54757   5
  -3   2 -13 2.14618 3.10743  10
  -4  -2 -13 2.66187 2.51723   3
  -4  -2 -13 2.99203 2.83546  10
   4  -2  13 -0.3566 1.71389   2
[truncated: 133,095 more chars]
